# Supplementary material for: A systematic literature review informing the consensus statement on efficacy and safety of pharmacological treatment with interleukin-6 pathway inhibition with biological DMARDs in immune-mediated inflammatory diseases
Source: PubMed Central journal article supplement (PMC9462104; doi:10.1136/rmdopen-2022-002359), 2022-09-07
Supplement: rmdopen-2022-002359supp001.pdf [file rmdopen-2022-002359supp001.pdf]

# **A systematic literature review informing the consensus statement on efficacy and safety of pharmacological treatment with interleukin-6 pathway inhibition with biological DMARDs**

## **Online Supplementary appendix**

**Section 2: Characteristics of articles and abstracts included: Efficacy for approved indications**

**Section 3: Characteristics of articles and abstracts included: Efficacy for other studied diseases**

**Section 4: Characteristics of articles and abstracts included: Safety aspects of interleukin-6 pathway inhibition**

**Section 5: Characteristics of articles and abstracts included: Biomarkers for prediction of therapeutic response of interleukin-6 pathway inhibition**

**Section 6: Characteristics of articles and abstracts included: Patient adherence/preferences and economic aspects of interleukin-6 pathway inhibition**

**Section 7: Figures and tables for colorblind persons**

**Section 8: References**

## Table of contents

|                                                                                                                                                                                                 |    |
|-------------------------------------------------------------------------------------------------------------------------------------------------------------------------------------------------|----|
| Section 2: Characteristics of articles and abstracts included: Efficacy for approved indications .....                                                                                          | 15 |
| 2.1. Details of articles and abstracts selected for inclusion .....                                                                                                                             | 15 |
| Table S2.1.1: Rheumatoid arthritis (RA) .....                                                                                                                                                   | 15 |
| Table S2.1.2: Systemic juvenile idiopathic arthritis (sJIA) .....                                                                                                                               | 18 |
| Table S2.1.3: Polyarticular-course juvenile idiopathic arthritis (pcJIA) .....                                                                                                                  | 18 |
| Table S2.1.4: Adult-onset Still's disease (AoSD) .....                                                                                                                                          | 18 |
| Table S2.1.5: Giant cell arteritis (GCA) .....                                                                                                                                                  | 19 |
| Table S2.1.6: Takayasu arteritis (TAK) .....                                                                                                                                                    | 20 |
| Table S2.1.7: Multicentric Castleman's disease (MCD) .....                                                                                                                                      | 20 |
| Table S2.1.8: CAR-T cell induced Cytokine Release Syndrome (CRS) .....                                                                                                                          | 20 |
| Table S2.1.9: Neuromyelitis optica spectrum disorders (NMOSD) .....                                                                                                                             | 21 |
| 2.2. Risk of bias analysis .....                                                                                                                                                                | 22 |
| Table S2.2.1: Rheumatoid arthritis (RA) .....                                                                                                                                                   | 22 |
| Table S2.2.2: Systemic juvenile idiopathic arthritis (sJIA) .....                                                                                                                               | 26 |
| Table S2.2.3: Polyarticular-course juvenile idiopathic arthritis (pcJIA) .....                                                                                                                  | 26 |
| Table S2.2.4: Adult-onset Still's disease (AoSD) .....                                                                                                                                          | 27 |
| Table S2.2.5: Giant cell arteritis (GCA) .....                                                                                                                                                  | 27 |
| Table S2.2.6: Takayasu arteritis (TAK) .....                                                                                                                                                    | 28 |
| Table S2.2.7: Multicentric Castleman's disease (MCD) .....                                                                                                                                      | 28 |
| Table S2.2.8: CAR-T cell induced Cytokine Release Syndrome (CRS) .....                                                                                                                          | 29 |
| Table S2.2.9: Neuromyelitis optica spectrum disorders (NMOSD) .....                                                                                                                             | 29 |
| 2.3. Baseline characteristics .....                                                                                                                                                             | 30 |
| 2.3.1: Rheumatoid arthritis (RA) .....                                                                                                                                                          | 30 |
| Table S2.3.1.1: Baseline characteristics of trials investigating IL-6R/L blockers + MTX or csDMARDs versus placebo in patients with inadequate response or intolerance to MTX or csDMARDs ..... | 30 |
| Table S2.3.1.2: Baseline characteristics of trials investigating IL-6R/L blockers in patients with inadequate response or intolerance to TNF-inhibitors .....                                   | 33 |
| Table S2.3.1.3: Baseline characteristics of trials investigating IL-6R/L blockers in patients with inadequate response or intolerance to csDMARDs or TNF-inhibitors .....                       | 34 |
| Table S2.3.1.4: Baseline characteristics of trials investigating IL-6R/L blockers vs. other bDMARDs (Head-to-Head trials) .....                                                                 | 35 |
| Table S2.3.1.5: Switch studies. Part 1: Baseline characteristics of trials investigating (switching) route of administration and dosage adaptation of IL-6R/L blockers .....                    | 36 |
| Table S2.3.1.6: Switch studies. Part 2: Baseline characteristics of trials investigating add-on versus switching to IL-6R blockers .....                                                        | 37 |

|                                                                                                                                                                                                     |    |
|-----------------------------------------------------------------------------------------------------------------------------------------------------------------------------------------------------|----|
| Table S2.3.1.7: Switch studies. Part 3: Baseline characteristics of trials investigating switching to another IL-6R blocker. ....                                                                   | 38 |
| Table S2.3.1.8: Induction/Strategic studies. Part 1: Baseline characteristics of trials comparing the effectiveness of IL-6R blocker monotherapy and combination therapy with MTX in early RA. .... | 39 |
| Table S2.3.1.9: Induction/Strategic studies. Part 2: Baseline characteristics of trials comparing the effectiveness of IL-6R blocker + MTX with conventional treatment in early RA.....             | 40 |
| Table S2.3.1.10: Tapering studies. Part 1: Baseline characteristics of trials investigating tapering of csDMARDs while on IL-6R blocker therapy. ....                                               | 41 |
| Table S2.3.1.11: Tapering studies. Part 2: Baseline characteristics of trials investigating tapering of glucocorticoids while on IL-6R blocker therapy. ....                                        | 42 |
| Table S2.3.1.12: Tapering studies. Part 3: Baseline characteristics of trials investigating tapering of IL-6R blockers. ....                                                                        | 42 |
| 2.3.2: Systemic juvenile idiopathic arthritis (sJIA).....                                                                                                                                           | 44 |
| Table S2.3.2.1: Baseline characteristics of trials investigating IL-6R/L blockers in sJIA. ....                                                                                                     | 44 |
| 2.3.3: Polyarticular-course juvenile idiopathic arthritis (pcJIA) .....                                                                                                                             | 45 |
| Table S2.3.3.1: Baseline characteristics of trials investigating IL-6R/L blockers in pcJIA. ....                                                                                                    | 45 |
| 2.3.4: Adult-onset Still’s disease (AoSD).....                                                                                                                                                      | 47 |
| Table S2.3.4.1: Baseline characteristics of trials investigating IL-6R/L blockers in AoSD.....                                                                                                      | 47 |
| 2.3.5: Giant cell arteritis (GCA).....                                                                                                                                                              | 48 |
| Table S2.3.5.1: Baseline characteristics of trials investigating IL-6R/L blockers in GCA. ....                                                                                                      | 48 |
| 2.3.6: Takayasu arteritis (TAK).....                                                                                                                                                                | 50 |
| Table S2.3.6.1: Baseline characteristics of trials investigating IL-6R/L blockers in TAK. ....                                                                                                      | 50 |
| 2.3.7: Multicentric Castleman’s disease (MCD) .....                                                                                                                                                 | 51 |
| Table S2.3.7.1: Baseline characteristics of trials investigating IL-6R/L blockers in MCD. ....                                                                                                      | 51 |
| 2.3.8: CAR-T cell induced Cytokine Release Syndrome (CRS).....                                                                                                                                      | 52 |
| Table S2.3.8.1: Baseline characteristics of trials investigating IL-6R/L blockers in CRS. ....                                                                                                      | 52 |
| 2.3.9: Neuromyelitis optica spectrum disorders (NMOSD).....                                                                                                                                         | 53 |
| Table S2.3.9.1: Baseline characteristics of trials investigating IL-6R/L blockers in NMOSD. ....                                                                                                    | 53 |
| 2.4. Efficacy outcomes.....                                                                                                                                                                         | 54 |
| 2.4.1: Rheumatoid arthritis (RA).....                                                                                                                                                               | 54 |
| Table S2.4.1.1: Efficacy outcomes of trials investigating IL-6R/L blockers + MTX or csDMARDs versus placebo in patients with inadequate response or intolerance to MTX or csDMARDs.....             | 54 |
| Table S2.4.1.2: Efficacy outcomes of trials investigating IL-6R/L blockers in patients with inadequate response or intolerance to TNF-inhibitors. ....                                              | 56 |
| Table S2.4.1.3: Efficacy outcomes of trials investigating IL-6R/L blockers in patients with inadequate response or intolerance to csDMARDs or TNF-inhibitors. ....                                  | 58 |
| Table S2.4.1.4: Efficacy outcomes of trials investigating IL-6R/L blockers vs. other bDMARDs (Head-to-Head trials). ....                                                                            | 59 |

|                                                                                                                                                                                              |    |
|----------------------------------------------------------------------------------------------------------------------------------------------------------------------------------------------|----|
| Table S2.4.1.5: Switch studies. Part 1: Efficacy outcomes of trials investigating (switching) route of administration and dosage adaptation of IL-6R/L blockers. ....                        | 60 |
| Table S2.4.1.6: Switch studies. Part 2: Efficacy outcomes of trials investigating add-on versus switching to IL-6R blockers. ....                                                            | 61 |
| Table S2.4.1.7: Switch studies. Part 3: Efficacy outcomes of trials investigating switching to another IL-6R blocker. ....                                                                   | 63 |
| Table S2.4.1.8: Induction/Strategic studies. Part 1: Efficacy outcomes of trials comparing the effectiveness of IL-6R blocker monotherapy and combination therapy with MTX in early RA. .... | 64 |
| Table S2.4.1.9: Induction/Strategic studies. Part 2: Efficacy outcomes of trials comparing the effectiveness of IL-6R blocker + MTX with conventional treatment in early RA. ....            | 66 |
| Table S2.4.1.10: Tapering studies. Part 1: Efficacy outcomes of trials investigating tapering of csDMARDs while on IL-6R blocker therapy. ....                                               | 66 |
| Table S2.4.1.11: Tapering studies. Part 2: Efficacy outcomes of trials investigating tapering of glucocorticoids while on IL-6R blocker therapy. ....                                        | 68 |
| Table S2.4.1.12: Tapering studies. Part 3: Efficacy outcomes of trials investigating tapering of IL-6R blockers. ....                                                                        | 69 |
| 2.4.2: Systemic juvenile idiopathic arthritis (sJIA) .....                                                                                                                                   | 71 |
| Table S2.4.2.1: Efficacy outcomes of trials investigating IL-6R/L blockers in sJIA. ....                                                                                                     | 71 |
| 2.4.3: Polyarticular-course juvenile idiopathic arthritis (pcJIA) .....                                                                                                                      | 72 |
| Table S2.4.3.1: Efficacy outcomes of trials investigating IL-6R/L blockers in pcJIA. ....                                                                                                    | 72 |
| 2.4.4: Adult-onset Still's disease (AoSD).....                                                                                                                                               | 73 |
| Table S2.4.4.1: Efficacy outcomes of trials investigating IL-6R/L blockers in AoSD. ....                                                                                                     | 73 |
| 2.4.5: Giant cell arteritis (GCA).....                                                                                                                                                       | 74 |
| Table S2.4.5.1: Efficacy outcomes of trials investigating IL-6R/L blockers in GCA. ....                                                                                                      | 74 |
| 2.4.6: Takayasu arteritis (TAK).....                                                                                                                                                         | 76 |
| Table S2.4.6.1: Efficacy outcomes of trials investigating IL-6R/L blockers in TAK.....                                                                                                       | 76 |
| 2.4.7: Multicentric Castleman's disease (MCD) .....                                                                                                                                          | 77 |
| Table S2.4.7.1: Efficacy outcomes of trials investigating IL-6R/L blockers in MCD.....                                                                                                       | 77 |
| 2.4.8: CAR-T cell induced Cytokine Release Syndrome (CRS).....                                                                                                                               | 78 |
| Table S2.4.8.1: Efficacy outcome of trials investigating IL-6R/L blockers in CRS. ....                                                                                                       | 78 |
| 2.4.9: Neuromyelitis optica spectrum disorders (NMOSD).....                                                                                                                                  | 79 |
| Table S2.4.9.1: Efficacy outcomes of trials investigating IL-6R/L blockers in NMOSD. ....                                                                                                    | 79 |
| Section 3: Characteristics of articles and abstracts included: Efficacy for other studied diseases.....                                                                                      | 81 |
| 3.1. Details of articles and abstracts selected for inclusion .....                                                                                                                          | 81 |
| Table S3.1.1: Psoriatic arthritis (PsA) .....                                                                                                                                                | 81 |
| Table S3.1.2: Axial spondyloarthritis (axSpA).....                                                                                                                                           | 81 |
| Table S3.1.3: Osteoarthritis (OA).....                                                                                                                                                       | 82 |
| Table S3.1.4: Polymyalgia rheumatica (PMR).....                                                                                                                                              | 82 |
| Table S3.1.5: ANCA-associated vasculitis (GPA, MPA) .....                                                                                                                                    | 83 |

|                                                                                                                                                                                          |     |
|------------------------------------------------------------------------------------------------------------------------------------------------------------------------------------------|-----|
| Table S3.1.6: Remitting seronegative symmetric synovitis with pitting edema (RS3PE).....                                                                                                 | 83  |
| Table S3.1.7: Systemic sclerosis associated interstitial lung disease (SSc-ILD) .....                                                                                                    | 84  |
| Table S3.1.8: Idiopathic inflammatory myopathies (IIM).....                                                                                                                              | 84  |
| Table S3.1.9: Systemic lupus erythematosus (SLE) .....                                                                                                                                   | 85  |
| Table S3.1.10: Primary Sjögren’s syndrome (pSS).....                                                                                                                                     | 86  |
| Table S3.1.11: Amyloid A (AA)- Amyloidosis (AAA).....                                                                                                                                    | 86  |
| Table S3.1.12: Multiple Myeloma (MM) .....                                                                                                                                               | 87  |
| Table S3.1.13: Refractory relapsing polychondritis.....                                                                                                                                  | 88  |
| Table S3.1.14: Cytokine release syndrome CRS (associated with severe SARS-CoV-2 infection,<br>Macrophage activating syndrome).....                                                       | 89  |
| Table S3.1.15: Tumor necrosis factor receptor-associated periodic fever syndrome (TRAPS).....                                                                                            | 92  |
| Table S3.1.16: Chronic infantile neurological cutaneous and articular syndrome (CINCA) .....                                                                                             | 92  |
| Table S3.1.17: Late antibody-mediated kidney transplant rejection (ABMR).....                                                                                                            | 92  |
| 3.2. Risk of bias analysis .....                                                                                                                                                         | 93  |
| Table S3.2.1: Psoriatic arthritis (PsA) .....                                                                                                                                            | 93  |
| Table S3.2.2: Axial spondyloarthritis (axSpA).....                                                                                                                                       | 93  |
| Table S3.2.3: Osteoarthritis (OA).....                                                                                                                                                   | 94  |
| Table S3.2.4: Polymyalgia rheumatica (PMR).....                                                                                                                                          | 94  |
| Table S3.2.5: ANCA-associated vasculitis (GPA, MPA) .....                                                                                                                                | 95  |
| Table S3.2.6: Remitting seronegative symmetric synovitis with pitting edema (RS3PE).....                                                                                                 | 95  |
| Table S3.2.7: Systemic sclerosis associated interstitial lung disease (SSc-ILD) .....                                                                                                    | 96  |
| Table S3.2.8: Idiopathic inflammatory myopathies (IIM).....                                                                                                                              | 96  |
| Table S3.2.9: Systemic lupus erythematosus (SLE) .....                                                                                                                                   | 97  |
| Table S3.2.10: Primary Sjögren’s syndrome (pSS).....                                                                                                                                     | 97  |
| Table S3.2.11: Amyloid A (AA)-Amyloidosis (AAA) .....                                                                                                                                    | 98  |
| Table S3.2.12: Multiple Myeloma (MM) .....                                                                                                                                               | 98  |
| Table S3.2.13: Refractory relapsing polychondritis.....                                                                                                                                  | 99  |
| Table S3.2.14.1: Cytokine release syndrome CRS (associated with severe SARS-CoV-2 infection,<br>Macrophage activating syndrome): Cohort studies/historically controlled comparison ..... | 99  |
| Table S3.2.14.2: Cytokine release syndrome CRS (associated with severe SARS-CoV-2 infection,<br>Macrophage activating syndrome): RCTs.....                                               | 100 |
| Table S3.2.15: Tumor necrosis factor receptor-associated periodic fever syndrome (TRAPS).....                                                                                            | 101 |
| Table S3.2.16: Chronic infantile neurological cutaneous and articular syndrome (CINCA) .....                                                                                             | 101 |
| Table S3.2.17: Late antibody-mediated kidney transplant rejection (ABMR).....                                                                                                            | 102 |
| 3.3. Baseline characteristics .....                                                                                                                                                      | 103 |
| 3.3.1: Psoriatic arthritis (PsA) .....                                                                                                                                                   | 103 |
| Table S3.3.1.1: Baseline characteristics of trials investigating IL-6R/L blockers in PsoA. ....                                                                                          | 103 |

|                                                                                                                                                                                                   |     |
|---------------------------------------------------------------------------------------------------------------------------------------------------------------------------------------------------|-----|
| 3.3.2: Axial spondyloarthritis (axSpA) .....                                                                                                                                                      | 104 |
| Table S3.3.2.1: Baseline characteristics of trials investigating IL-6R/L blockers in axSpA.....                                                                                                   | 104 |
| 3.3.3: Osteoarthritis (OA) .....                                                                                                                                                                  | 105 |
| Table S3.3.3.1: Baseline characteristics of trials investigating IL-6R/L blockers in OA. ....                                                                                                     | 105 |
| 3.3.4: Polymyalgia rheumatica (PMR) .....                                                                                                                                                         | 106 |
| Table S3.3.4.1: Baseline characteristics of trials investigating IL-6R/L blockers in PMR.....                                                                                                     | 106 |
| 3.3.5: ANCA-associated vasculitis (GPA, MPA).....                                                                                                                                                 | 107 |
| Table S3.3.5.1: Baseline characteristics of trials investigating IL-6R/L blockers in ANCA-associated vasculitis. ....                                                                             | 107 |
| 3.3.6: Remitting seronegative symmetric synovitis with pitting edema (RS3PE) .....                                                                                                                | 108 |
| Table S3.3.6.1: Baseline characteristics of trials investigating IL-6R/L blockers in RS3PE. ....                                                                                                  | 108 |
| 3.3.7: Systemic sclerosis associated interstitial lung disease (SSc-ILD).....                                                                                                                     | 109 |
| Table S3.3.7.1: Baseline characteristics of trials investigating IL-6R/L blockers in SSc-ILD.....                                                                                                 | 109 |
| 3.3.8: Idiopathic inflammatory myopathies (IIM) .....                                                                                                                                             | 110 |
| Table S3.3.8.1: Baseline characteristics of trials investigating IL-6R/L blockers in IIM. ....                                                                                                    | 110 |
| 3.3.9: Systemic lupus erythematosus (SLE) .....                                                                                                                                                   | 111 |
| Table S3.3.9.1: Baseline characteristics of trials investigating IL-6R/L blockers in SLE. ....                                                                                                    | 111 |
| 3.3.10: Primary Sjögren’s syndrome (pSS) .....                                                                                                                                                    | 112 |
| Table S3.3.10.1: Baseline characteristics of trials investigating IL-6R/L blockers in pSS.....                                                                                                    | 112 |
| 3.3.11: Amyloid A (AA)-Amyloidosis (AAA).....                                                                                                                                                     | 113 |
| Table S3.3.11.1: Baseline characteristics of trials investigating IL-6R/L blockers in AAA.....                                                                                                    | 113 |
| 3.3.12: Multiple Myeloma (MM).....                                                                                                                                                                | 114 |
| Table S3.3.12.1: Baseline characteristics of trials investigating IL-6R/L blockers in MM.....                                                                                                     | 114 |
| 3.3.13: Refractory relapsing polychondritis .....                                                                                                                                                 | 115 |
| Table S3.3.13.1: Baseline characteristics of trials investigating IL-6R/L blockers in refractory relapsing polychondritis.....                                                                    | 115 |
| 3.3.13: Cytokine release syndrome CRS (associated with severe SARS-CoV-2 infection, Macrophage activating syndrome).....                                                                          | 116 |
| Table S3.3.14.1: Baseline characteristics of trials investigating IL-6R/L blockers in CRS (associated with severe SARS-CoV-2 infection, Macrophage activating syndrome): Cohort studies I .....   | 116 |
| Table S3.3.14.2: Baseline characteristics of trials investigating IL-6R/L blockers in CRS (associated with severe SARS-CoV-2 infection, Macrophage activating syndrome): Cohort studies II .....  | 117 |
| Table S3.3.14.3: Baseline characteristics of trials investigating IL-6R/L blockers in CRS (associated with severe SARS-CoV-2 infection, Macrophage activating syndrome): Cohort studies III ..... | 117 |
| Table S3.3.14.4: Baseline characteristics of trials investigating IL-6R/L blockers in CRS (associated with severe SARS-CoV-2 infection, Macrophage activating syndrome): Cohort studies IV .....  | 118 |
| Table S3.3.14.5: Baseline characteristics of trials investigating IL-6R/L blockers in CRS (associated with severe SARS-CoV-2 infection, Macrophage activating syndrome): Cohort studies V .....   | 118 |

|                                                                                                                                                                                                                   |     |
|-------------------------------------------------------------------------------------------------------------------------------------------------------------------------------------------------------------------|-----|
| Table S3.3.14.6: Baseline characteristics of trials investigating IL-6R/L blockers in CRS (associated with severe SARS-CoV-2 infection, Macrophage activating syndrome): Cohort studies VI .....                  | 119 |
| Table S3.3.14.7: Baseline characteristics of trials investigating IL-6R/L blockers in CRS (associated with severe SARS-CoV-2 infection, Macrophage activating syndrome): Historically controlled comparison ..... | 119 |
| Table S3.3.14.8: Baseline characteristics of trials investigating IL-6R/L blockers in CRS (associated with severe SARS-CoV-2 infection, Macrophage activating syndrome): RCTs .....                               | 120 |
| 3.3.15: Tumor necrosis factor receptor-associated periodic fever syndrome (TRAPS) .....                                                                                                                           | 121 |
| Table S3.3.15.1: Baseline characteristics of trials investigating IL-6R/L blockers in TRAPS. ....                                                                                                                 | 121 |
| 3.3.16: Chronic infantile neurological cutaneous and articular syndrome (CINCA).....                                                                                                                              | 122 |
| Table S3.3.16.1: Baseline characteristics of trials investigating IL-6R/L blockers in CINCA. ....                                                                                                                 | 122 |
| 3.3.17: Late antibody-mediated kidney transplant rejection (ABMR) .....                                                                                                                                           | 123 |
| Table S3.3.17.1: Baseline characteristics of trials investigating IL-6R/L blockers in ABMR. ....                                                                                                                  | 123 |
| 3.4. Efficacy outcomes.....                                                                                                                                                                                       | 124 |
| 3.4.1: Psoriatic arthritis (PsA) .....                                                                                                                                                                            | 124 |
| Table S3.4.1.1: Efficacy outcomes of trials investigating IL-6R/L blockers in PsoA.....                                                                                                                           | 124 |
| 3.4.2: Axial spondyloarthritis (axSpA) .....                                                                                                                                                                      | 125 |
| Table S3.4.2.1: Efficacy outcomes of trials investigating IL-6R/L blockers in axSpA.....                                                                                                                          | 125 |
| 3.4.3: Osteoarthritis (OA) .....                                                                                                                                                                                  | 126 |
| Table S3.4.3.1: Efficacy outcomes of trials investigating IL-6R/L blockers in OA.....                                                                                                                             | 126 |
| 3.4.4: Polymyalgia rheumatica (PMR) .....                                                                                                                                                                         | 127 |
| Table S3.4.4.1: Efficacy outcomes of trials investigating IL-6R/L blockers in PMR. ....                                                                                                                           | 127 |
| 3.4.5: ANCA-associated vasculitis (GPA, MPA).....                                                                                                                                                                 | 128 |
| Table S3.4.5.1: Efficacy outcomes of trials investigating IL-6R/L blockers in ANCA-associated vasculitis. ....                                                                                                    | 128 |
| 3.4.6: Remitting seronegative symmetric synovitis with pitting edema (RS3PE) .....                                                                                                                                | 129 |
| Table S3.4.6.1: Efficacy outcomes of trials investigating IL-6R/L blockers in RS3PE.....                                                                                                                          | 129 |
| 3.4.7: Systemic sclerosis associated interstitial lung disease (SSc-ILD).....                                                                                                                                     | 130 |
| Table S3.4.7.1: Efficacy outcomes of trials investigating IL-6R/L blockers in SSc-ILD. ....                                                                                                                       | 130 |
| 3.4.8: Idiopathic inflammatory myopathies (IIM) .....                                                                                                                                                             | 131 |
| Table S3.4.8.1: Efficacy outcomes of trials investigating IL-6R/L blockers in IIM. ....                                                                                                                           | 131 |
| 3.4.9: Systemic lupus erythematosus (SLE) .....                                                                                                                                                                   | 132 |
| Table S3.4.9.1: Efficacy outcomes of trials investigating IL-6R/L blockers in SLE. ....                                                                                                                           | 132 |
| 3.4.10: Primary Sjögren's syndrome (pSS) .....                                                                                                                                                                    | 133 |
| Table S3.4.10.1: Efficacy outcomes of trials investigating IL-6R/L blockers in pSS.....                                                                                                                           | 133 |
| 3.4.11: Amyloid A (AA)-Amyloidosis (AAA).....                                                                                                                                                                     | 134 |
| Table S3.4.11.1: Efficacy outcomes of trials investigating IL-6R/L blockers in AAA.....                                                                                                                           | 134 |
| 3.4.12: Multiple Myeloma (MM).....                                                                                                                                                                                | 135 |

|                                                                                                                                                                                                            |     |
|------------------------------------------------------------------------------------------------------------------------------------------------------------------------------------------------------------|-----|
| Table S3.4.12.1: Efficacy outcomes of trials investigating IL-6R/L blockers in MM. ....                                                                                                                    | 135 |
| 3.4.13: Refractory relapsing polychondritis .....                                                                                                                                                          | 136 |
| Table S3.4.13.1: Efficacy outcomes of trials investigating IL-6R/L blockers in refractory relapsing polychondritis. ....                                                                                   | 136 |
| 3.4.14: Cytokine release syndrome CRS (associated with severe SARS-CoV-2 infection, Macrophage activating syndrome) .....                                                                                  | 137 |
| Table S3.4.14.1: Efficacy outcome of trials investigating IL-6R/L blockers in CRS (associated with severe SARS-CoV-2 infection, Macrophage activating syndrome): Cohort studies I .....                    | 137 |
| Table S3.4.14.2: Efficacy outcome of trials investigating IL-6R/L blockers in CRS (associated with severe SARS-CoV-2 infection, Macrophage activating syndrome): Cohort studies II .....                   | 138 |
| Table S3.4.14.3: Efficacy outcome of trials investigating IL-6R/L blockers in CRS (associated with severe SARS-CoV-2 infection, Macrophage activating syndrome): Cohort studies III .....                  | 138 |
| Table S3.4.14.4: Efficacy outcome of trials investigating IL-6R/L blockers in CRS (associated with severe SARS-CoV-2 infection, Macrophage activating syndrome): Cohort studies IV .....                   | 139 |
| Table S3.4.14.5: Efficacy outcome of trials investigating IL-6R/L blockers in CRS (associated with severe SARS-CoV-2 infection, Macrophage activating syndrome): Cohort studies V .....                    | 140 |
| Table S3.4.14.6: Efficacy outcome of trials investigating IL-6R/L blockers in CRS (associated with severe SARS-CoV-2 infection, Macrophage activating syndrome): Cohort studies VI .....                   | 141 |
| Table S3.4.14.7: Efficacy outcomes of trials investigating IL-6R/L blockers in CRS (associated with severe SARS-CoV-2 infection, Macrophage activating syndrome): Historically controlled comparison ..... | 142 |
| Table S3.4.14.8: Efficacy outcomes of trials investigating IL-6R/L blockers in CRS (associated with severe SARS-CoV-2 infection, Macrophage activating syndrome): RCTs .....                               | 143 |
| 3.4.15: Tumor necrosis factor receptor-associated periodic fever syndrome (TRAPS) .....                                                                                                                    | 146 |
| Table S3.4.15.1: Efficacy outcomes of trials investigating IL-6R/L blockers in TRAPS.....                                                                                                                  | 146 |
| 3.4.16: Chronic infantile neurological cutaneous and articular syndrome (CINCA).....                                                                                                                       | 147 |
| Table S3.4.16.1: Efficacy outcomes of trials investigating IL-6R/L blockers in CINCA.....                                                                                                                  | 147 |
| 3.4.17: Late antibody-mediated kidney transplant rejection (ABMR) .....                                                                                                                                    | 148 |
| Table S3.4.17.1: Efficacy outcomes of trials investigating IL-6R/L blockers in ABMR.....                                                                                                                   | 148 |
| Section 4: Characteristics of articles and abstracts included: Safety aspects of interleukin-6 pathway inhibition .....                                                                                    | 149 |
| 4.1. Cardiovascular events.....                                                                                                                                                                            | 149 |
| 4.1.1: Composite Outcome (MACE): Comparison between IL-6R/L blockers and different bDMARDs (observational studies/randomized controlled trials).....                                                       | 149 |
| Table S4.1.1.1: Baseline characteristics of observational studies investigating IL-6R/L blockers regarding MACE (major adverse cardiac events).....                                                        | 149 |
| Table S4.1.1.2: Risk of bias analysis (Newcastle-Ottawa Scale [NOS] for Cohort studies).....                                                                                                               | 150 |
| Table S4.1.1.3: Safety outcomes of observational studies regarding MACE.....                                                                                                                               | 151 |
| Table S4.1.1.4: Baseline characteristics of RCTs investigating IL-6R/L blockers regarding MACE (major adverse cardiac events).....                                                                         | 152 |



|                                                                                                                                                               |     |
|---------------------------------------------------------------------------------------------------------------------------------------------------------------|-----|
| Table S4.1.1.5: Risk of bias analysis (Cochrane Risk of Bias Tool for RCTs).....                                                                              | 152 |
| Table S4.1.1.6: Safety outcomes of RCTs regarding MACE. ....                                                                                                  | 153 |
| 4.1.2: Myocardial infarction: Comparison between IL-6R/L blockers and different bDMARDs (observational studies/randomized controlled trials).....             | 154 |
| Table S4.1.2.1: Baseline characteristics of observational studies investigating IL-6R/L blockers regarding myocardial infarction. ....                        | 154 |
| Table S4.1.2.2: Risk of bias analysis (Newcastle-Ottawa Scale [NOS] for Cohort studies).....                                                                  | 155 |
| Table S4.1.2.3: Safety outcomes of observational studies regarding myocardial infarction.....                                                                 | 155 |
| Table S4.1.2.4: Baseline characteristics of RCTs investigating IL-6R/L blockers regarding myocardial infarction. ....                                         | 157 |
| Table S4.1.2.5: Safety outcomes of RCTs regarding MACE. ....                                                                                                  | 157 |
| 4.1.3: Stroke/Transient ischemic attack: Comparison between IL-6R/L blockers and different bDMARDs (observational studies/randomized controlled trials) ..... | 158 |
| Table S4.1.3.1: Baseline characteristics of observational studies investigating IL-6R/L blockers regarding stroke/transient ischemic attack. ....             | 158 |
| Table S4.1.3.2: Safety outcomes of observational studies regarding stroke/transient ischemic attack. ....                                                     | 159 |
| Table S4.1.3.3: Baseline characteristics of RCTs investigating IL-6R/L blockers regarding stroke/transient ischemic attack.....                               | 160 |
| Table S4.1.3.4: Safety outcomes of RCTs regarding stroke/transient ischemic attack. ....                                                                      | 160 |
| 4.1.4: Heart failure: Comparison between IL-6R/L blockers and different bDMARDs (observational studies/randomized controlled trials).....                     | 161 |
| Table S4.1.4.1: Baseline characteristics of observational studies investigating IL-6R/L blockers regarding heart failure. ....                                | 161 |
| Table S4.1.4.2: Safety outcomes of observational studies regarding heart failure. ....                                                                        | 161 |
| Table S4.1.4.3: Baseline characteristics of RCTs investigating IL-6R/L blockers regarding stroke/transient ischemic attack.....                               | 162 |
| Table S4.1.4.4: Safety outcomes of RCTs regarding stroke/transient ischemic attack. ....                                                                      | 162 |
| 4.1.5: Coronary Revascularisation: Comparison between IL-6R/L blockers and different bDMARDs (observational studies/randomized controlled trials).....        | 163 |
| Table S4.1.5.1: Baseline characteristics of observational studies investigating IL-6R/L blockers regarding coronary revascularization.....                    | 163 |
| Table S4.1.5.2: Safety outcomes of observational studies regarding coronary revascularization. ....                                                           | 163 |
| 4.1.6: Venous thromboembolism (VTE): Comparison between IL-6R/L blockers and different bDMARDs (randomized controlled trials) .....                           | 164 |
| Table S4.1.6.1: Baseline characteristics of RCTs investigating IL-6R/L blockers regarding VTE.....                                                            | 164 |
| Table S4.1.6.2: Safety outcomes of RCTs regarding VTE.....                                                                                                    | 164 |
| 4.2. Vaccination .....                                                                                                                                        | 165 |
| 4.2.1: Vaccination: Comparison between IL-6R/L blockers and different b/csDMARDs (clinical trials) .....                                                      | 165 |

|                                                                                                                                                               |     |
|---------------------------------------------------------------------------------------------------------------------------------------------------------------|-----|
| Table S4.2.1.1: Included clinical trials investigating IL-6R/L blockers regarding antibody response after vaccination.....                                    | 165 |
| Table S4.2.1.2: Risk of bias analysis.....                                                                                                                    | 166 |
| Table S4.2.1.3: Outcomes of clinical trials investigating IL-6R/L blockers regarding antibody response after vaccination.....                                 | 167 |
| 4.3. Infections.....                                                                                                                                          | 170 |
| 4.3.1: Serious infections: Comparison between IL-6R/L blockers and different bDMARDs (observational studies/randomized controlled trials).....                | 170 |
| Table S4.3.1.1: Baseline characteristics of observational studies investigating IL-6R/L blockers regarding serious infections. ....                           | 170 |
| Table S4.3.1.2: Risk of bias analysis (Newcastle-Ottawa Scale [NOS] for Cohort studies).....                                                                  | 171 |
| Table S4.3.1.3: Safety outcomes of observational studies regarding serious infections.....                                                                    | 172 |
| Table S4.3.1.4.1: Safety outcomes of observational studies regarding subtypes of serious infections. ....                                                     | 176 |
| Table S4.3.1.4.2: Safety outcomes of observational studies regarding subtypes of serious infections. ....                                                     | 177 |
| 4.3.2: Opportunistic infections: Comparison between IL-6R/L blockers and different bDMARDs (observational studies/randomized controlled trials).....          | 178 |
| Table S4.3.2.1: Baseline characteristics of observational studies investigating IL-6R/L blockers regarding opportunistic infections. ....                     | 178 |
| Table S4.3.2.2: Risk of bias analysis (Newcastle-Ottawa Scale [NOS] for Cohort studies).....                                                                  | 179 |
| Table S4.3.2.3: Safety outcomes of observational studies regarding opportunistic infections.....                                                              | 179 |
| 4.3.3: Tuberculosis: Comparison between IL-6R/L blockers and different bDMARDs (observational studies/randomized controlled trials).....                      | 181 |
| Table S4.3.3.1: Baseline characteristics of observational studies investigating IL-6R/L blockers regarding tuberculosis.....                                  | 181 |
| Table S4.3.3.2: Risk of bias analysis (Newcastle-Ottawa Scale [NOS] for Cohort studies).....                                                                  | 182 |
| Table S4.3.3.3: Safety outcomes of observational studies regarding tuberculosis.....                                                                          | 183 |
| 4.3.4: Pneumocystis jirovecii pneumonia: Comparison between IL-6R/L blockers and different bDMARDs (observational studies/randomized controlled trials) ..... | 185 |
| Table S4.3.4.1: Baseline characteristics of observational studies investigating IL-6R/L blockers regarding pneumocystis jirovecii pneumonia. ....             | 185 |
| Table S4.3.4.2: Safety outcomes of observational studies regarding pneumocystis jirovecii pneumonia. ....                                                     | 185 |
| 4.3.5: Herpes zoster: Comparison between IL-6R/L blockers and different bDMARDs (observational studies/randomized controlled trials).....                     | 186 |
| Table S4.3.5.1: Baseline characteristics of observational studies investigating IL-6R/L blockers regarding herpes zoster.....                                 | 186 |
| Table S4.3.5.2: Risk of bias analysis (Newcastle-Ottawa Scale [NOS] for Cohort studies).....                                                                  | 187 |
| Table S4.3.5.3: Safety outcomes of observational studies regarding herpes zoster. ....                                                                        | 187 |

|                                                                                                                                                                |     |
|----------------------------------------------------------------------------------------------------------------------------------------------------------------|-----|
| 4.4. Malignancies.....                                                                                                                                         | 190 |
| 4.4.1: All types of cancer: Comparison between IL-6R/L blockers and different bDMARDs (observational studies/randomized controlled trials).....                | 190 |
| Table S4.4.1.1: Baseline characteristics of observational studies investigating IL-6R/L blockers regarding all types of cancer (excluding NMSC).....           | 190 |
| Table S4.4.1.2: Risk of bias analysis (Newcastle-Ottawa Scale [NOS] for Cohort studies).....                                                                   | 191 |
| Table S4.4.1.3: Safety outcomes of observational studies regarding all types of cancer (invasive solid or hematologic malignant neoplasm excluding NMSC). .... | 191 |
| 4.4.2: Invasive solid cancer: Comparison between IL-6R/L blockers and different bDMARDs (observational studies/randomized controlled trials).....              | 193 |
| Table S4.4.2.1: Baseline characteristics of observational studies investigating IL-6R/L blockers regarding invasive solid cancer. ....                         | 193 |
| Table S4.4.2.2: Safety outcomes of observational studies regarding invasive solid cancer. ....                                                                 | 193 |
| 4.4.3: Invasive hematologic cancer: Comparison between IL-6R/L blockers and different bDMARDs (observational studies/randomized controlled trials).....        | 194 |
| Table S4.4.3.1: Baseline characteristics of observational studies investigating IL-6R/L blockers regarding invasive hematologic cancer. ....                   | 194 |
| Table S4.4.3.2: Safety outcomes of observational studies regarding invasive hematologic cancer... ..                                                           | 195 |
| 4.4.4: Non-Hodgkin's Lymphoma: Comparison between IL-6R/L blockers and different bDMARDs (observational studies/randomized controlled trials).....             | 196 |
| Table S4.4.4.1: Baseline characteristics of observational studies investigating IL-6R/L blockers regarding Non-Hodgkin's Lymphoma.....                         | 196 |
| Table S4.4.4.2: Risk of bias analysis (Newcastle-Ottawa Scale [NOS] for Cohort studies).....                                                                   | 196 |
| Table S4.4.4.3: Safety outcomes of observational studies regarding Non-Hodgkin's Lymphoma. ....                                                                | 197 |
| 4.4.5: Non melanoma skin cancer (NMSC): Comparison between IL-6R/L blockers and different bDMARDs (observational studies/randomized controlled trials) .....   | 198 |
| Table S4.4.5.1: Baseline characteristics of observational studies investigating IL-6R/L blockers regarding NMSC.....                                           | 198 |
| Table S4.4.5.2: Safety outcomes of observational studies regarding NMSC. ....                                                                                  | 199 |
| 4.4.6: Melanoma: Comparison between IL-6R/L blockers and different bDMARDs (observational studies/randomized controlled trials).....                           | 200 |
| Table S4.4.6.1: Baseline characteristics of observational studies investigating IL-6R/L blockers regarding invasive melanoma. ....                             | 200 |
| Table S4.4.6.2: Risk of bias analysis (Newcastle-Ottawa Scale [NOS] for Cohort studies).....                                                                   | 201 |
| Table S4.4.6.3: Safety outcomes of observational studies regarding invasive melanoma. ....                                                                     | 201 |
| 4.5. Gastrointestinal and hepatic events.....                                                                                                                  | 203 |
| 4.5.1: Diverticulitis: Comparison between IL-6R/L blockers and different bDMARDs (observational studies/randomized controlled trials).....                     | 203 |
| Table S4.5.1.1: Baseline characteristics of observational studies investigating IL-6R/L blockers regarding diverticulitis.....                                 | 203 |

|                                                                                                                                                                                                                               |     |
|-------------------------------------------------------------------------------------------------------------------------------------------------------------------------------------------------------------------------------|-----|
| Table S4.5.1.2: Risk of bias analysis (Newcastle-Ottawa Scale [NOS] for Cohort studies).....                                                                                                                                  | 204 |
| Table S4.5.1.3: Safety outcomes of observational studies regarding diverticulitis. ....                                                                                                                                       | 204 |
| 4.5.2: Gastrointestinal perforation (GIP): Comparison between IL-6R/L blockers and different bDMARDs (observational studies/randomized controlled trials) .....                                                               | 206 |
| Table S4.5.2.1: Baseline characteristics of observational studies investigating IL-6R/L blockers regarding GIP.....                                                                                                           | 206 |
| Table S4.5.2.2: Risk of bias analysis (Newcastle-Ottawa Scale [NOS] for Cohort studies).....                                                                                                                                  | 207 |
| Table S4.5.2.3: Safety outcomes of observational studies regarding GIP.....                                                                                                                                                   | 208 |
| 4.5.3: Hepatic events:.....                                                                                                                                                                                                   | 213 |
| Table S4.5.3.1: Baseline characteristics of observational studies investigating IL-6R/L blockers regarding hepatic events. ....                                                                                               | 213 |
| Table S4.5.3.2: Risk of bias analysis (Newcastle-Ottawa Scale [NOS] for Cohort studies).....                                                                                                                                  | 214 |
| Table S4.5.3.3: Safety outcomes of observational studies regarding hepatic events I.....                                                                                                                                      | 214 |
| Table S4.5.3.4: Safety outcomes of observational studies regarding hepatic events (transaminase elevations) II .....                                                                                                          | 215 |
| 4.6. Adverse events of special interest.....                                                                                                                                                                                  | 216 |
| 4.6.1: Withdrawal and immunologic events: Comparison between IL-6R/L blockers and different bDMARDs (observational studies/randomized controlled trials) .....                                                                | 216 |
| Table S4.6.1.1: Safety outcomes of observational studies investigating IL-6R/L blockers regarding withdrawals. ....                                                                                                           | 216 |
| Table S4.6.1.2: Safety outcomes of observational studies investigating IL-6R/L blockers regarding immunologic events. ....                                                                                                    | 218 |
| 4.6.2: Changes in lipid profile: Comparison between IL-6R/L blockers and different bDMARDs (observational studies/randomized controlled trials).....                                                                          | 219 |
| Table S4.6.2.1: Baseline characteristics of RCTs investigating IL-6R/L blockers regarding changes in lipid profile.....                                                                                                       | 219 |
| Table S4.6.2.2: Outcomes of RCTs investigating IL-6R/L blockers regarding changes in lipid profile. ....                                                                                                                      | 219 |
| 4.6.3: Diabetes and changes in HbA1c: Comparison between IL-6R/L blockers and different bDMARDs (observational studies/randomized controlled trials).....                                                                     | 221 |
| Table S4.6.3.1: Safety outcomes of observational studies investigating IL-6R/L blockers regarding risk of diabetes treatment intensification and switching to insulin. ....                                                   | 221 |
| Table S4.6.3.2: Baseline characteristics of post hoc analyses investigating effects of IL-6R/L blockers vs. TNF-i on glycosylated hemoglobin (HbA1c) in patients with RA and subgroups of patients with RA and diabetes ..... | 221 |
| Table S4.6.3.3: Outcomes of post hoc analyses investigating effects of IL-6R/L blockers vs. TNF-i on glycosylated hemoglobin (HbA1c) in patients with RA and subgroups of patients with RA and diabetes. ....                 | 222 |
| 4.6.4: Effects on anemia and risk of neutropenia: Comparison between IL-6R/L blockers and different bDMARDs (observational studies/randomized controlled trials) .....                                                        | 223 |
| Table S4.6.4.1: Safety outcomes of observational studies investigating IL-6R/L blockers regarding changes in hemoglobin in patients with anemia at index date. ....                                                           | 223 |

|                                                                                                                                                                            |     |
|----------------------------------------------------------------------------------------------------------------------------------------------------------------------------|-----|
| Table S4.6.4.2: Safety outcomes of observational studies investigating IL-6R/L blockers regarding changes in neutrophils and neutropenia associated risk of infection..... | 224 |
| 4.6.5: Renal insufficiency: Comparison between IL-6R/L blockers and different bDMARDs (observational studies/randomized controlled trials).....                            | 225 |
| Table S4.6.5.1: Safety outcomes of observational studies investigating IL-6R/L blockers in patients with RA and renal insufficiency .....                                  | 225 |
| 4.6.6: Interstitial lung disease (ILD): Comparison between IL-6R/L blockers and different bDMARDs (observational studies/randomized controlled trials).....                | 227 |
| Table S4.6.6.1: Safety outcomes of observational studies investigating IL-6R/L blockers regarding risk of ILD and its complications.....                                   | 227 |
| 4.6.7: Neurological AEs: Comparison between IL-6R/L blockers and different bDMARDs (observational studies/randomized controlled trials).....                               | 228 |
| Table S4.6.7.1: Safety outcomes of observational studies investigating IL-6R/L blockers regarding risk of idiopathic facial nerve palsy.....                               | 228 |
| 4.6.8: Bone mineral density and osteoporosis: Comparison between IL-6R/L blockers and different bDMARDs (observational studies/randomized controlled trials) .....         | 229 |
| Table S4.6.8.1: Safety outcomes of observational studies investigating IL-6R/L blockers regarding risk of osteoporotic fracture and other subtypes of fractures. ....      | 229 |
| Table S4.6.8.2: Outcomes of prospective studies investigating effects of IL-6R/L blockers on bone mineral density.....                                                     | 230 |
| 4.6.9: Pregnancy: Clinical trials and post-marketing data.....                                                                                                             | 231 |
| Table S4.6.9.1: Pregnancy outcome after exposure to IL-6R inhibition.....                                                                                                  | 231 |
| Table S4.6.9.2: Pregnancy outcome after exposure to IL-6R inhibition.....                                                                                                  | 232 |
| 4.6.10: Randomized controlled trials (RCTs) and long-term extension studies (LTEs).....                                                                                    | 232 |
| Table S4.6.10.1: Sarilumab: Overview of RCTs.....                                                                                                                          | 232 |
| Table S4.6.10.2: Sarilumab: Rates of serious AEs, serious infections, opportunistic infections, deaths, malignancies and CVE (RCTs).....                                   | 233 |
| Table S4.6.10.3: Sarilumab: Rates of GIP, injection-site / infusion reactions, immunogenicity and neutropenia (RCTs).....                                                  | 234 |
| Table S4.6.10.4: Sarilumab: Rates of serious AEs, deaths, malignancies and CVE (LTE).....                                                                                  | 235 |
| Table S4.6.10.5: Sarilumab: Rates of serious infections, opportunistic infections, serious demyelinating disorders and VTE (LTE).....                                      | 236 |
| Table S4.6.10.6: Sarilumab: Rates of GIP, injection-site / infusion reactions, immunogenicity, neutropenia and hepatic disorders (LTE).....                                | 236 |
| Table S4.6.10.7: Sirukumab: Overview of RCTs.....                                                                                                                          | 237 |
| Table S4.6.10.8: Sirukumab: Rates of serious AEs, serious infections, opportunistic infections, deaths, malignancies and CVE (RCTs).....                                   | 238 |
| Table S4.6.10.9: Sirukumab: Rates of GIP, injection-site / infusion reactions, immunogenicity, neutropenia and hepatic disorders (RCTs).....                               | 239 |
| Table S4.6.10.10: Sirukumab: Rates of serious AEs, serious infections, opportunistic infections, deaths, malignancies and CVE (LTE).....                                   | 240 |

|                                                                                                                                                                                                                                                                                                          |     |
|----------------------------------------------------------------------------------------------------------------------------------------------------------------------------------------------------------------------------------------------------------------------------------------------------------|-----|
| Table S4.6.10.11: Sirukumab: Rates of GIP, injection-site / infusion reactions, immunogenicity, neutropenia and hepatic disorders (LTE). .....                                                                                                                                                           | 240 |
| 4.6.11: Juvenile idiopathic arthritis (JIA): Comparison between IL-6R/L blockers and different bDMARDs (observational studies/randomized controlled trials) .....                                                                                                                                        | 241 |
| Table S4.6.11.1: Safety outcomes of observational studies investigating IL-6R/L blockers in JIA regarding serious AEs. ....                                                                                                                                                                              | 241 |
| Table S4.6.11.2: Safety outcomes of observational studies investigating IL-6R/L blockers in JIA regarding serious infections. ....                                                                                                                                                                       | 242 |
| Table S4.6.11.3: Safety outcomes of observational studies investigating IL-6R/L blockers in JIA regarding malignancies. ....                                                                                                                                                                             | 243 |
| Table S4.6.11.4: Safety outcomes of observational studies investigating IL-6R/L blockers in JIA regarding GIP. ....                                                                                                                                                                                      | 244 |
| Table S4.6.11.5: Safety outcomes of observational studies investigating IL-6R/L blockers in JIA regarding hepatic events. ....                                                                                                                                                                           | 244 |
| Table S4.6.11.6: Safety outcomes of observational studies investigating IL-6R/L blockers in JIA regarding demyelination. ....                                                                                                                                                                            | 245 |
| Table S4.6.11.7: Safety outcomes of observational studies investigating IL-6R/L blockers in JIA regarding tuberculosis. ....                                                                                                                                                                             | 246 |
| Table S4.6.11.8: Safety outcomes of observational studies investigating IL-6R/L blockers in JIA regarding withdrawals. ....                                                                                                                                                                              | 247 |
| Table S4.6.11.9: Safety outcomes of observational studies investigating IL-6R/L blockers in JIA regarding macrophage activation syndrome (MAS). ....                                                                                                                                                     | 247 |
| Section 5: Characteristics of articles and abstracts included: Biomarkers for prediction of therapeutic response of interleukin-6 pathway inhibition. ....                                                                                                                                               | 249 |
| Table S5.1: Overview of included studies. ....                                                                                                                                                                                                                                                           | 249 |
| Table S5.2: Outcomes of studies investigating biomarkers for prediction of therapeutic response of interleukin-6 pathway inhibition. ....                                                                                                                                                                | 250 |
| Section 6: Characteristics of articles and abstracts included: Patient adherence/preferences and economic aspects of interleukin-6 pathway inhibition. ....                                                                                                                                              | 256 |
| Table S6.1: Outcomes of studies investigating patient adherence and preferences in patients treated with IL-6R/L blockers. ....                                                                                                                                                                          | 256 |
| Table S6.2: Outcomes of studies investigating economic aspects of treatment with IL-6R/L blockers. ....                                                                                                                                                                                                  | 261 |
| Section 7: Figures and tables for colorblind persons .....                                                                                                                                                                                                                                               | 264 |
| Figure S7.1: Efficacy of biological disease modifying anti-rheumatic drugs targeting the IL-6 receptor or ligand and their relative efficacy and or regulatory approvals .....                                                                                                                           | 264 |
| Table S7.2: Efficacy outcomes of clinical trials published from 2012 to 2020 investigating biologic disease modifying antirheumatic drugs (bDMARDs) specifically inhibiting IL-6 receptor or ligand compared against placebo or control group, shown across other studied immune-mediated diseases. .... | 265 |
| Section 8 References .....                                                                                                                                                                                                                                                                               | 266 |

## Section 2: Characteristics of articles and abstracts included: Efficacy for approved indications

### 2.1. Details of articles and abstracts selected for inclusion

Table S2.1.1: Rheumatoid arthritis (RA)

| Study                               | Treatment                       | Target | Population |
|-------------------------------------|---------------------------------|--------|------------|
| Huizinga 2014 (MOBILITY Part A) (1) | Sarilumab                       | IL-6R  | MTX-IR     |
| Genovese 2015 (MOBILITY Part B) (2) | Sarilumab                       | IL-6R  | MTX-IR     |
| Tanaka 2019 (KAKEHASI) (3)          | Sarilumab                       | IL-6R  | MTX-IR     |
| Mazurov 2020 (AURORA, 1-year) (4)   | Levilimab (BCD-089)             | IL-6R  | MTX-IR     |
| NCT02309359 (not published) (5)     | Vobarilizumab (ALX-0061)        | IL-6R  | MTX-IR     |
| NCT02287922 (not published) (6)     | Vobarilizumab (ALX-0061)        | IL-6R  | MTX-IR     |
| Nasonov 2020 (CREDO-1) (7)          | Olokizumab                      | IL-6   | MTX-IR     |
| Mease 2012 (8)                      | Clazakizumab (BMS945429/ALD518) | IL-6   | MTX-IR     |
| Baek 2019 (9)                       | Tocilizumab                     | IL-6R  | csDMARD    |
| NCT00773461 (not published) (10)    | Tocilizumab                     | IL-6R  | csDMARD    |
| Takeuchi 2017 (SIRROUND-D) (11)     | Sirukumab                       | IL-6   | csDMARD    |
| Fleischmann 2017 (TARGET) (12)      | Sarilumab                       | IL-6R  | TNFi-IR    |
| Takeuchi 2016 (RA0083) (13)         | Olokizumab                      | IL-6   | TNFi-IR    |

|                                           |                                                                                               |                                    |                                                            |
|-------------------------------------------|-----------------------------------------------------------------------------------------------|------------------------------------|------------------------------------------------------------|
| Aletaha 2017 (SIRROUND-T) (14)            | Sirukumab                                                                                     | IL-6                               | TNFi-IR                                                    |
| Genovese 2014 (15)                        | Olokizumab                                                                                    | IL-6                               | TNFi-IR                                                    |
| Yazici 2012 (ROSE) (16)                   | Tocilizumab                                                                                   | IL-6R                              | cs-/bDMARD-IR (mixed)                                      |
| Kivitz 2014 (BREVACTA) (17)               | Tocilizumab                                                                                   | IL-6R                              | cs-/bDMARD-IR (mixed)                                      |
| NCT00977106 (TORPEDO, not published) (18) | Tocilizumab                                                                                   | IL-6R                              | cs-/bDMARD-IR (mixed)                                      |
| Gabay 2013 (ADACTA) (19)                  | Tocilizumab vs. Adalimumab                                                                    | IL-6R vs. TNF                      | MTX-IR                                                     |
| Burmester 2017 (MONARCH) (20)             | Sarilumab vs. Adalimumab                                                                      | IL-6R vs. TNF                      | MTX-IR                                                     |
| Taylor 2018 (SIRROUND-H) (21)             | Sirukumab vs. Adalimumab                                                                      | IL-6 vs. TNF                       | MTX-IR                                                     |
| Weinblatt 2015 (22)                       | Clazakizumab (Adalimumab + MTX as active reference)                                           | IL-6 (TNF+MTX as active reference) | MTX-IR                                                     |
| Burmester 2014 (SUMMACTA) (23)            | Tocilizumab SC vs. Tocilizumab IV                                                             | IL-6R                              | cs-/bDMARD-IR                                              |
| Ogata 2014 (MUSASHI) (24)                 | Tocilizumab SC vs. Tocilizumab IV                                                             | IL-6R                              | cs-/bDMARD-IR                                              |
| Ogata 2015 (MUSASHI-OLE) (25)             | Tocilizumab IV/SC vs. Tocilizumab SC/SC                                                       | IL-6R                              | MUSASHI:<br>TCZ-SC or TCZ-IV mono                          |
| Ogata 2018 (SHINOBI) (26)                 | Tocilizumab QW vs. Tocilizumab Q2W                                                            | IL-6R                              | TCZ-SC Q2W-IR                                              |
| Dougados 2013 (ACT-RAY) (27)              | Tocilizumab + MTX vs. Tocilizumab mono                                                        | IL-6R                              | MTX-IR                                                     |
| Dougados 2014 (ACT-RAY, 1-year) (28)      | Tocilizumab + MTX vs. Tocilizumab mono                                                        | IL-6R                              | ACT-RAY, prespecified exploratory analyses (up to week 52) |
| Kaneko 2016 (SURPRISE) (29)               | Tocilizumab + MTX vs. Tocilizumab mono                                                        | IL-6R                              | MTX-IR                                                     |
| Emery 2020 (EXTEND, OLE) (30)             | Switching from Tocilizumab (or Sarilumab 150mg SC) to, or continuing, Sarilumab 200 mg SC Q2W | IL-6R                              | TNFi-IR, concom. csDMARD                                   |



|                                             |                                                                                                                           |                               |                                                          |
|---------------------------------------------|---------------------------------------------------------------------------------------------------------------------------|-------------------------------|----------------------------------------------------------|
| Burmester 2016 (FUNCTION) (31)              | Tocilizumab + MTX vs. Tocilizumab vs. MTX                                                                                 | IL-6R                         | MTX naïve, early RA                                      |
| Burmester 2017 (FUNCTION, 2-years) (32)     | Tocilizumab + MTX vs. Tocilizumab vs. MTX                                                                                 | IL-6R                         | MTX naïve, early RA                                      |
| Bijlsma 2016 (U-ACT-EARLY) (33)             | Tocilizumab + MTX vs. Tocilizumab vs. MTX                                                                                 | IL-6R                         | DMARD naïve, early RA                                    |
| Hetland 2020 (NORD-STAR) (34)               | MTX+ active conventional treatment vs. Tocilizumab + MTX vs. Abatacept + MTX vs. Certolizumab + MTX                       | IL-6R vs. TNF vs. CD-80/CD-86 | treatment-naïve, early RA                                |
| Edwards 2018 (ACT-TAPER) (35)               | Tocilizumab + MTX tapering vs. Tocilizumab + MTX continuation                                                             | IL-6R                         | DMARD-IR (bDMARD-naïve)                                  |
| Kremer 2018 (COMP-ACT) (36)                 | Tocilizumab + MTX discontinuation vs. Tocilizumab + MTX continuation                                                      | IL-6R                         | MTX-IR                                                   |
| Pablos 2019 (JUST-ACT) (37)                 | Tocilizumab + MTX discontinuation vs. Tocilizumab + MTX continuation                                                      | IL-6R                         | MTX-IR (bDMARD-naïve)                                    |
| Peterfy 2020 (COMP-ACT MRI Substudy) (38)   | Tocilizumab + MTX discontinuation vs. Tocilizumab + MTX continuation                                                      | IL-6R                         | MTX-IR                                                   |
| Burmester 2020 (SEMIRA) (39)                | Tocilizumab + GC tapering vs. Tocilizumab + GC continuation                                                               | IL-6R                         | TCZ SC/IV ± (cs)DMARD and GC                             |
| Huizinga 2015 (ACT-RAY, 2 and 3-years) (40) | Discontinuation of Tocilizumab + csDMARD/MTX                                                                              | IL-6R                         | Tocilizumab + MTX (add-on) vs. Tocilizumab mono (switch) |
| Kaneko 2018 (SURPRISE, 2-years) (41)        | After Tocilizumab discontinuation: MTX vs. no DMARD                                                                       | IL-6R                         | Tocilizumab + MTX (add-on) vs. Tocilizumab mono (switch) |
| Kedra 2019 (TOLEDO) (42)                    | Tocilizumab (or Abatacept) maintenance vs. Tocilizumab (or Abatacept) progressive injection spacing up to discontinuation | IL-6R, CD-80/CD-86            | ABA or TCZ for ≥ 1 year (mono +/-csDMARD, GC)            |

Table S2.1.2: Systemic juvenile idiopathic arthritis (sJIA)

| Study                           | Treatment   | Target | Population               |
|---------------------------------|-------------|--------|--------------------------|
| De Benedetti 2012 (TENDER) (43) | Tocilizumab | IL-6R  | NSAID-IR, GC-IR;         |
| Malattia 2020 (44)              | Tocilizumab | IL-6R  | s/pc-JIA: TENDER/CHERISH |

Table S2.1.3: Polyarticular-course juvenile idiopathic arthritis (pcJIA)

| Study                       | Treatment   | Target | Population               |
|-----------------------------|-------------|--------|--------------------------|
| Brunner 2015 (CHERISH) (45) | Tocilizumab | IL-6R  | MTX-IR                   |
| Malattia 2020 (44)          | Tocilizumab | IL-6R  | s/pc-JIA: TENDER/CHERISH |

Table S2.1.4: Adult-onset Still's disease (AoSD)

| Study            | Treatment   | Target | Population |
|------------------|-------------|--------|------------|
| Kaneko 2018 (46) | Tocilizumab | IL-6R  | GC-IR      |

Table S2.1.5: Giant cell arteritis (GCA)

| Study                                       | Treatment                         | Target | Population                                                              |
|---------------------------------------------|-----------------------------------|--------|-------------------------------------------------------------------------|
| Stone 2017 (GiACTA) (47)                    | Tocilizumab                       | IL-6R  | GCA patients $\geq$ 50 years of age, new-onset or relapsing GCA         |
| Stone 2019 (3-year analysis) (48)           | Tocilizumab                       | IL-6R  | GiACTA: GCA patients $\geq$ 50 years of age, new-onset or relapsing GCA |
| Calderón-Goercke 2019 (49)                  | Tocilizumab IV vs. Tocilizumab SC | IL-6R  | GC-IR                                                                   |
| Schmidt 2020 (50)<br>study terminated early | Sirukumab                         | IL-6   | New-onset GCA                                                           |

Table S2.1.6: Takayasu arteritis (TAK)

| Study                              | Treatment   | Target | Population                                     |
|------------------------------------|-------------|--------|------------------------------------------------|
| Nakaoka 2018 (the TAKT study) (51) | Tocilizumab | IL-6R  | TAK relapse and induced into remission with GC |

Table S2.1.7: Multicentric Castleman's disease (MCD)

| Study              | Treatment  | Target | Population                                                                                      |
|--------------------|------------|--------|-------------------------------------------------------------------------------------------------|
| Van Rhee 2014 (52) | Siltuximab | IL-6   | Human immunodeficiency virus and human herpesvirus-8-seronegative patients with symptomatic MCD |

Table S2.1.8: CAR-T cell induced Cytokine Release Syndrome (CRS)

| Study        | Treatment   | Target | Population                                                                                                  |
|--------------|-------------|--------|-------------------------------------------------------------------------------------------------------------|
| Le 2018 (53) | Tocilizumab | IL-6R  | severe or life-threatening CAR-T cell-induced CRS in adults and in pediatric patients $\geq 2$ years of age |

Table S2.1.9: Neuromyelitis optica spectrum disorders (NMOSD)

| Study                           | Treatment                    | Target                                   | Population                                                                   |
|---------------------------------|------------------------------|------------------------------------------|------------------------------------------------------------------------------|
| Zhang 2020 (TANGO) (54)         | Tocilizumab vs. Azathioprine | IL-6R vs. inhibition of purine synthesis | AQP4-IgG seropositive/negative relapsing NMOSD                               |
| Yamamura 2019 (SAkuraStar) (55) | Satralizumab                 | IL-6R                                    | AQP4-IgG seropositive/negative relapsing NMOSD, GC and/or DMARD allowed      |
| Traboulosee 2020 (56)           | Satralizumab                 | IL-6R                                    | AQP4-IgG seropositive/negative relapsing NMOSD, no concomitant DMARD allowed |

## 2.2. Risk of bias analysis

Table S2.2.1: Rheumatoid arthritis (RA)

| Study                               | Random sequence generation | Allocation concealment | Blinding of participants and personnel | Blinding of outcome assessment | Incomplete outcome data | Selective reporting | Other sources of bias | Summary  | Comment             |
|-------------------------------------|----------------------------|------------------------|----------------------------------------|--------------------------------|-------------------------|---------------------|-----------------------|----------|---------------------|
| Huizinga 2014 (MOBILITY Part A) (1) | Low                        | Low                    | Low                                    | Low                            | Low                     | Low                 | Low                   | Low      |                     |
| Genovese 2015 (MOBILITY Part B) (2) | Low                        | Low                    | Low                                    | Low                            | Low                     | Low                 | Low                   | Low      |                     |
| Tanaka 2019 (KAKEHASI) (3)          | Low                        | Low                    | Low                                    | Low                            | Low                     | Low                 | Low                   | Low      |                     |
| Mazurov 2020 (AURORA, 1-year) (4)   | Abstract                   | Abstract               | Abstract                               | Abstract                       | Abstract                | Abstract            | Abstract              | Abstract | Open label          |
| NCT02309359 (not published) (5)     | -                          | -                      | -                                      | -                              | -                       | -                   | -                     | -        | Not fully published |
| NCT02287922 (not published) (6)     | -                          | -                      | -                                      | -                              | -                       | -                   | -                     | -        | Not fully published |
| Nasonov 2020 CREDO-1 (7)            | Abstract                   | Abstract               | Abstract                               | Abstract                       | Abstract                | Abstract            | Abstract              | Abstract |                     |
| Mease 2012 (8)                      | Low                        | Low                    | Low                                    | Low                            | Low                     | Low                 | Low                   | Low      |                     |
| Baek 2019 (9)                       | Low                        | Low                    | Low                                    | Low                            | Low                     | Low                 | Low                   | Low      |                     |

|                                  |         |         |     |     |     |     |     |      |         |                                 |
|----------------------------------|---------|---------|-----|-----|-----|-----|-----|------|---------|---------------------------------|
| NCT00773461 (not published) (10) | -       | -       | -   | -   | -   | -   | -   | -    | -       | Not fully published             |
| Takeuchi 2017 (SIRROUND-D) (11)  | Unclear | Unclear | Low | Low | Low | Low | Low | Low  | Unclear |                                 |
| Fleischmann 2017 (TARGET) (12)   | Low     | Low     | Low | Low | Low | Low | Low | Low  | Low     |                                 |
| Takeuchi 2016 (RA0083) (13)      | Low     | Low     | Low | Low | Low | Low | Low | Low  | Low     |                                 |
| Aletaha 2017 (SIRROUND-T) (14)   | Low     | Low     | Low | Low | Low | Low | Low | Low  | Low     |                                 |
| Genovese 2014 (15)               | Low     | Low     | Low | Low | Low | Low | Low | Low  | Low     |                                 |
| Yazici 2012 (ROSE) (16)          | Low     | Low     | Low | Low | Low | Low | Low | Low  | Low     |                                 |
| Kivitz 2014 (BREVACTA) (17)      | Unclear | Unclear | Low | Low | Low | Low | Low | Low  | Unclear |                                 |
| NCT00977106 (TORPEDO) (18)       | -       | -       | -   | -   | -   | -   | -   | -    | -       | Not fully published             |
| Gabay 2013 (ADACTA) (19)         | Low     | Low     | Low | Low | Low | Low | Low | High | High    | Δ DAS28-ESR as primary endpoint |
| Burmester 2017 (MONARCH) (20)    | Low     | Low     | Low | Low | Low | Low | Low | High | High    | Δ DAS28-ESR as primary endpoint |
| Taylor 2018 (SIRROUND-H) (21)    | Low     | Low     | Low | Low | Low | Low | Low | High | High    | Δ DAS28-ESR as primary endpoint |
| Weinblatt 2015 (22)              | Unclear | Unclear | Low | Low | Low | Low | Low | Low  | Unclear |                                 |
| Burmester 2014 (SUMMACTA) (23)   | Low     | Low     | Low | Low | Low | Low | Low | Low  | Low     |                                 |

|                                         |         |         |      |      |      |         |      |         |                                                                                            |
|-----------------------------------------|---------|---------|------|------|------|---------|------|---------|--------------------------------------------------------------------------------------------|
| Ogata 2014 (MUSASHI) (24)               | Low     | Low     | Low  | Low  | Low  | Low     | Low  | Low     |                                                                                            |
| Ogata 2015 (MUSASHI-OLE) (25)           | Low     | Low     | High | High | Low  | Low     | Low  | High    | Open label study                                                                           |
| Ogata 2018 (SHINOBI) (26)               | Low     | Low     | Low  | Low  | Low  | Low     | Low  | Low     |                                                                                            |
| Dougados 2013 (ACT-RAY) (27)            | Unclear | Unclear | Low  | Low  | Low  | Unclear | Low  | Unclear |                                                                                            |
| Dougados 2014 (ACT-RAY, 1-year) (28)    | Unclear | Unclear | High | High | Low  | Low     | Low  | High    | Open-label study; csDMARDs other than MTX were added at week 24 or later if DAS28 >3.2     |
| Kaneko 2016 (SURPRISE) (29)             | Low     | Low     | High | High | High | Low     | Low  | High    | not double-blind, number of patients enrolled lower as planned                             |
| Emery 2020 (EXTEND, OLE) (30)           | Unclear | Low     | High | High | Low  | Low     | Low  | High    | Open label extension study of ASCERTAIN trial (57)                                         |
| Burmester 2016 (FUNCTION) (31)          | Low     | Low     | Low  | Low  | Low  | Low     | High | High    | $\Delta$ DAS28-ESR as primary endpoint                                                     |
| Burmester 2017 (FUNCTION, 2-years) (32) | Low     | Low     | High | High | Low  | Low     | High | High    | Patients not achieving DAS28-ESR $\leq$ 3.2 at week 52 switched to escape therapy (8 mg/kg |



|                                             |          |          |          |          |          |          |          |          |                                               |
|---------------------------------------------|----------|----------|----------|----------|----------|----------|----------|----------|-----------------------------------------------|
|                                             |          |          |          |          |          |          |          |          | TCZ+MTX). Analyses were exploratory.          |
| Bijlsma 2016 (U-ACT-EARLY) (33)             | Low      | Low      | Low      | Low      | Low      | Low      | High     | High     | Δ DAS28-ESR as primary endpoint               |
| Hetland 2020 (NORD-STAR) (34)               | Low      | Low      | Low      | High     | Low      | Low      | Low      | High     | Open label design                             |
| Edwards 2018 (ACT-TAPER) (35)               | Unclear  | Unclear  | Low      | Low      | Unclear  | Unclear  | Unclear  | Unclear  | Study terminated early due to low recruitment |
| Kremer 2018 (COMP-ACT) (36)                 | Unclear  | Unclear  | Low      | Low      | Low      | Low      | Low      | Unclear  |                                               |
| Pablos 2019 (JUST-ACT) (37)                 | Low      | Low      | Low      | Low      | Low      | Low      | Low      | Low      |                                               |
| Peterfy 2020 (COMP-ACT MRI Substudy) (38)   | Unclear  | Unclear  | Low      | Low      | Low      | Low      | Low      | Unclear  |                                               |
| Burmester 2020 (SEMIRA) (39)                | Low      | Low      | Low      | Low      | Low      | Low      | Low      | Low      |                                               |
| Huizinga 2015 (ACT-RAY, 2 and 3-years) (40) | Unclear  | Unclear  | High     | High     | Low      | Low      | Low      | High     |                                               |
| Kaneko 2018 (SURPRISE, 2-years) (41)        | Low      | Low      | High     | High     | High     | Low      | Low      | High     |                                               |
| Kedra 2019 (TOLEDO) (42)                    | Abstract | Abstract | Abstract | Abstract | Abstract | Abstract | Abstract | Abstract |                                               |

Table S2.2.2: Systemic juvenile idiopathic arthritis (sJIA)

| Study                           | Random sequence generation | Allocation concealment | Blinding of participants and personnel | Blinding of outcome assessment | Incomplete outcome data | Selective reporting | Other sources of bias | Summary | Comment                                                                                                      |
|---------------------------------|----------------------------|------------------------|----------------------------------------|--------------------------------|-------------------------|---------------------|-----------------------|---------|--------------------------------------------------------------------------------------------------------------|
| De Benedetti 2012 (TENDER) (43) | Low                        | Low                    | Low                                    | Low                            | Low                     | Unclear             | Low                   | Unclear | ACR Pediatric 50,70,90 with inclusion of systemic features (fever, rash) only reported for tocilizumab group |
| Malattia 2020 (44)              | Low                        | Low                    | High                                   | High                           | Low                     | Low                 | Low                   | High    | post hoc radiographic analysis from two randomized controlled trials                                         |

Table S2.2.3: Polyarticular-course juvenile idiopathic arthritis (pcJIA)

| Study                       | Random sequence generation | Allocation concealment | Blinding of participants and personnel | Blinding of outcome assessment | Incomplete outcome data | Selective reporting | Other sources of bias | Summary | Comment                                                |
|-----------------------------|----------------------------|------------------------|----------------------------------------|--------------------------------|-------------------------|---------------------|-----------------------|---------|--------------------------------------------------------|
| Brunner 2015 (CHERISH) (45) | Low                        | Low                    | Low                                    | Low                            | Low                     | Low                 | Low                   | Low     | In part 2, JIA-ACR30 responders were randomly assigned |

|                    |     |     |      |      |     |     |     |      |                                     |
|--------------------|-----|-----|------|------|-----|-----|-----|------|-------------------------------------|
|                    |     |     |      |      |     |     |     |      | to PBO or continue TCZ as in part 1 |
| Malattia 2020 (44) | Low | Low | High | High | Low | Low | Low | High |                                     |

Table S2.2.4: Adult-onset Still's disease (AoSD)

| Study            | Random sequence generation | Allocation concealment | Blinding of participants and personnel | Blinding of outcome assessment | Incomplete outcome data | Selective reporting | Other sources of bias | Summary | Comment |
|------------------|----------------------------|------------------------|----------------------------------------|--------------------------------|-------------------------|---------------------|-----------------------|---------|---------|
| Kaneko 2018 (46) | Low                        | Low                    | Low                                    | Low                            | Low                     | Low                 | Low                   | Low     |         |

Table S2.2.5: Giant cell arteritis (GCA)

| Study                             | Random sequence generation | Allocation concealment | Blinding of participants and personnel | Blinding of outcome assessment | Incomplete outcome data | Selective reporting | Other sources of bias | Summary  | Comment |
|-----------------------------------|----------------------------|------------------------|----------------------------------------|--------------------------------|-------------------------|---------------------|-----------------------|----------|---------|
| Stone 2017 (GiACTA) (47)          | Low                        | Low                    | Low                                    | Low                            | Low                     | Low                 | Low                   | Low      |         |
| Stone 2019 (3-year analysis) (48) | Abstract                   | Abstract               | Abstract                               | Abstract                       | Abstract                | Abstract            | Abstract              | Abstract |         |
| Calderón-Goercke 2019 (49)        | Abstract                   | Abstract               | Abstract                               | Abstract                       | Abstract                | Abstract            | Abstract              | Abstract |         |

|                   |     |     |     |     |         |         |         |         |                                                   |
|-------------------|-----|-----|-----|-----|---------|---------|---------|---------|---------------------------------------------------|
| Schmidt 2020 (50) | Low | Low | Low | Low | Unclear | Unclear | Unclear | Unclear | terminated early (October 2017; sponsor decision) |
|-------------------|-----|-----|-----|-----|---------|---------|---------|---------|---------------------------------------------------|

Table S2.2.6: Takayasu arteritis (TAK)

| Study                              | Random sequence generation | Allocation concealment | Blinding of participants and personnel | Blinding of outcome assessment | Incomplete outcome data | Selective reporting | Other sources of bias | Summary | Comment |
|------------------------------------|----------------------------|------------------------|----------------------------------------|--------------------------------|-------------------------|---------------------|-----------------------|---------|---------|
| Nakaoka 2018 (the TAKT study) (51) | Low                        | Low                    | Low                                    | Low                            | Low                     | Low                 | Low                   | Low     |         |

Table S2.2.7: Multicentric Castleman's disease (MCD)

| Study              | Random sequence generation | Allocation concealment | Blinding of participants and personnel | Blinding of outcome assessment | Incomplete outcome data | Selective reporting | Other sources of bias | Summary | Comment |
|--------------------|----------------------------|------------------------|----------------------------------------|--------------------------------|-------------------------|---------------------|-----------------------|---------|---------|
| Van Rhee 2014 (52) | Low                        | Low                    | Low                                    | Low                            | Low                     | Low                 | Low                   | Low     |         |

Table S2.2.8: CAR-T cell induced Cytokine Release Syndrome (CRS)

| Study        | Random sequence generation | Allocation concealment | Blinding of participants and personnel | Blinding of outcome assessment | Incomplete outcome data | Selective reporting | Other sources of bias | Summary | Comment                                                                |
|--------------|----------------------------|------------------------|----------------------------------------|--------------------------------|-------------------------|---------------------|-----------------------|---------|------------------------------------------------------------------------|
| Le 2018 (53) | Unclear                    | Unclear                | High                                   | High                           | Low                     | High                | Unclear               | High    | retrospective analysis of pooled data from prospective clinical trials |

Table S2.2.9: Neuromyelitis optica spectrum disorders (NMOSD)

| Study                           | Random sequence generation | Allocation concealment | Blinding of participants and personnel | Blinding of outcome assessment | Incomplete outcome data | Selective reporting | Other sources of bias | Summary | Comment                                    |
|---------------------------------|----------------------------|------------------------|----------------------------------------|--------------------------------|-------------------------|---------------------|-----------------------|---------|--------------------------------------------|
| Zhang 2020 (TANGO) (54)         | Low                        | Low                    | High                                   | Unclear                        | Low                     | Low                 | Low                   | High    | not blinded for investigators and patients |
| Yamamura 2019 (SAkuraStar) (55) | Low                        | Low                    | Low                                    | Low                            | Low                     | Low                 | Low                   | Low     |                                            |
| Traboulee 2020 (56)             | Low                        | Low                    | Low                                    | Low                            | Low                     | Low                 | Low                   | Low     |                                            |

## 2.3. Baseline characteristics

### 2.3.1: Rheumatoid arthritis (RA)

Table S2.3.1.1: Baseline characteristics of trials investigating IL-6R/L blockers + MTX or csDMARDs versus placebo in patients with inadequate response or intolerance to MTX or csDMARDs.

| Study                               | Treatment                       | No. of patients (n) | Mean age (years) | Mean disease duration (years) | Mean DAS28 | Mean CDAI | Mean HAQ | Mean mTSS |
|-------------------------------------|---------------------------------|---------------------|------------------|-------------------------------|------------|-----------|----------|-----------|
| Huizinga 2014 (MOBILITY Part A) (1) | Placebo + MTX                   | 52                  | 55.2             | 8.07                          | 6.08       | 40.63     |          |           |
|                                     | SAR 100 mg Q2W + MTX            | 51                  | 53.5             | 9.76                          | 6.28       | 44.74     |          |           |
|                                     | SAR 150 mg Q2W + MTX            | 51                  | 51.2             | 7.74                          | 6.11       | 41.41     |          |           |
|                                     | SAR 100 mg QW + MTX             | 50                  | 53.9             | 8.07                          | 6.05       | 40.32     |          |           |
|                                     | SAR 200 mg Q2W + MTX            | 52                  | 48.7             | 5.95                          | 6.06       | 40.37     |          |           |
|                                     | SAR 150 mg QW + MTX             | 50                  | 50.9             | 7.30                          | 6.07       | 40.48     |          |           |
| Genovese 2015 (MOBILITY Part B) (2) | Placebo + MTX                   | 398                 | 50.9             | 9.1                           | 5.9        |           | 1.6      |           |
|                                     | SAR 150 mg Q2W + MTX            | 400                 | 50.1             | 9.5                           | 6.0        |           | 1.6      |           |
|                                     | SAR 200 mg Q2W + MTX            | 399                 | 50.8             | 8.6                           | 6.0        |           | 1.7      |           |
| Tanaka 2019 (KAKEHASI) (3)          | Placebo to SAR 150 mg Q2W + MTX | 42                  | 51.9             | 7.6                           | 5.6        | 34.4      | 1.1      |           |

|                                   |                                 |     |      |     |     |      |     |  |
|-----------------------------------|---------------------------------|-----|------|-----|-----|------|-----|--|
|                                   | Placebo to SAR 200 mg Q2W + MTX | 40  | 55.0 | 8.8 | 5.3 | 31.9 | 1.0 |  |
|                                   | SAR 150 mg Q2W + MTX            | 81  | 56.1 | 7.0 | 5.7 | 35.9 | 1.2 |  |
|                                   | SAR 200 mg Q2W + MTX            | 80  | 55.3 | 8.3 | 5.4 | 32.9 | 1.1 |  |
| Mazurov 2020 (AURORA, 1-year) (4) | LVL (BCD-089) 162 mg QW + MTX   | 35  |      |     |     |      |     |  |
|                                   | LVL (BCD-089) 162 mg Q2W + MTX  | 35  |      |     |     |      |     |  |
| NCT02309359 (not published) (5)   | Placebo + MTX                   | 69  | 52.8 |     |     |      |     |  |
|                                   | ALX-0061 75 mg Q4W + MTX        | 69  | 53.3 |     |     |      |     |  |
|                                   | ALX-0061 150 mg Q4W + MTX       | 70  | 52   |     |     |      |     |  |
|                                   | ALX-0061 150 mg Q2W + MTX       | 68  | 51.9 |     |     |      |     |  |
|                                   | ALX-0061 225 mg Q2W + MTX       | 69  | 52.3 |     |     |      |     |  |
| NCT02287922 (not published) (6)   | ALX-0061 150 mg Q4W Mono        | 62  | 53.0 |     |     |      |     |  |
|                                   | ALX-0061 150 mg Q2W Mono        | 62  | 51.2 |     |     |      |     |  |
|                                   | ALX-0061 225 mg Q2W Mono        | 63  | 51.3 |     |     |      |     |  |
|                                   | TCZ 162 mg QW or Q2W            | 64  | 50.0 |     |     |      |     |  |
| Nasonov 2020 (CREDO-1) (7)        | Placebo + MTX                   | 143 | 52.7 |     |     |      |     |  |
|                                   | OKZ 64 mg Q2W + MTX             | 143 | 52.0 |     |     |      |     |  |
|                                   | OKZ 64 mg Q4W + MTX             | 142 | 49.1 |     |     |      |     |  |
| Mease 2012 (8)                    | Placebo + MTX                   | 33  | 52   | 8   | 6.1 |      | 1.6 |  |

|                                                                                                                                                                                                                                                                                                                                                                                                                                      |                                   |     |      |      |     |  |     |      |
|--------------------------------------------------------------------------------------------------------------------------------------------------------------------------------------------------------------------------------------------------------------------------------------------------------------------------------------------------------------------------------------------------------------------------------------|-----------------------------------|-----|------|------|-----|--|-----|------|
|                                                                                                                                                                                                                                                                                                                                                                                                                                      | CLZ 80 mg (day 1 and wk 8) + MTX  | 32  | 53   | 7    | 6.3 |  | 1.7 |      |
|                                                                                                                                                                                                                                                                                                                                                                                                                                      | CLZ 160 mg (day 1 and wk 8) + MTX | 33  | 55   | 7    | 6.2 |  | 1.7 |      |
|                                                                                                                                                                                                                                                                                                                                                                                                                                      | CLZ 320 mg (day 1 and wk 8) + MTX | 29  | 50   | 6    | 6.2 |  | 1.7 |      |
| Baek 2019 (9)                                                                                                                                                                                                                                                                                                                                                                                                                        | Placebo + csDMARDs                | 48  | 52.0 | 8.9  | 6.1 |  | 1.4 |      |
|                                                                                                                                                                                                                                                                                                                                                                                                                                      | TCZ 8 mg/kg Q4W + csDMARDs        | 47  | 52.6 | 10.8 | 6.1 |  | 1.3 |      |
| NCT00773461 (not published) (10)                                                                                                                                                                                                                                                                                                                                                                                                     | Placebo + csDMARDs                | 69  | 47.8 |      |     |  |     |      |
|                                                                                                                                                                                                                                                                                                                                                                                                                                      | TCZ 8 mg/kg Q4W + csDMARDs        | 139 | 46.8 |      |     |  |     |      |
| Takeuchi 2017 (SIRROUND-D) (11)                                                                                                                                                                                                                                                                                                                                                                                                      | Placebo + csDMARDs                | 556 | 52.9 | 8.3  | 5.9 |  | 1.6 | 41.9 |
|                                                                                                                                                                                                                                                                                                                                                                                                                                      | SRK 50 mg Q4W + csDMARDs          | 557 | 52.9 | 8.7  | 5.9 |  | 1.5 | 41.8 |
|                                                                                                                                                                                                                                                                                                                                                                                                                                      | SRK 100 mg Q2W + csDMARDs         | 557 | 53   | 8.8  | 5.8 |  | 1.5 | 42.5 |
| MTX: methotrexate; csDMARD: conventional synthetic disease modifying drug; DAS28: Disease Activity Score 28; CDAI: Clinical Disease Activity Index; HAQ: Health assessment Questionnaire, mTSS: modified Total Sharp Score; SAR: sarilumab; Q2W: every other week; QW: once weekly; LVL: levilimab; ALX-0061: vobarilizumab; Q4W: once every 4 weeks; OKZ: olokizumab; CLZ: clazakizumab; wk: week; TCZ: tocilizumab; SRK: sirukumab |                                   |     |      |      |     |  |     |      |



Table S2.3.1.2: Baseline characteristics of trials investigating IL-6R/L blockers in patients with inadequate response or intolerance to TNF-inhibitors.

| Study                          | Treatment                 | No. of patients (n) | Mean age (years) | Mean disease duration (years) | Mean DAS28 | Mean CDAI | Mean HAQ | Mean mTSS |
|--------------------------------|---------------------------|---------------------|------------------|-------------------------------|------------|-----------|----------|-----------|
| Fleischmann 2017 (TARGET) (12) | Placebo + csDMARDs        | 181                 | 51.9             | 12.0                          | 6.2        |           | 1.8      |           |
|                                | SAR 150 mg Q2W + csDMARDs | 181                 | 54.0             | 11.6                          | 6.1        |           | 1.7      |           |
|                                | SAR 200 mg Q2W + csDMARDs | 184                 | 52.9             | 12.7                          | 6.3        |           | 1.8      |           |
| Takeuchi 2016 (RA0083) (13)    | Placebo + MTX             | 29                  | 52.6             | 6.5*                          | 5.3*       | 35.7*     | 1.13*    |           |
|                                | OKZ 60 mg Q4W + MTX       | 32                  | 53.9             | 7.6*                          | 5.5*       | 34.3*     | 1.19*    |           |
|                                | OKZ 120 mg Q4W + MTX      | 32                  | 55.7             | 6.9*                          | 5.2*       | 27.3*     | 1.25*    |           |
|                                | OKZ 240 mg Q4W + MTX      | 26                  | 56.7             | 6.9*                          | 5.3*       | 29.8*     | 0.88*    |           |
| Aletaha 2017 (SIRROUND-T) (14) | Placebo ± csDMARDs        | 294                 | 55.4             | 12.25                         | 5.84       | 39.06     | 1.57     |           |
|                                | SRK 50 mg Q4W ± csDMARDs  | 292                 | 55.8             | 12.85                         | 5.94       | 40.41     | 1.65     |           |
|                                | SRK 100 mg Q2W ± csDMARDs | 292                 | 55.0             | 12.27                         | 5.87       | 39.99     | 1.61     |           |
| Genovese 2014 (15)             | Placebo Q2W ± MTX         | 22                  | 59.36            | 10.56*                        | 5.53       | 36.83*    | 1.56*    |           |
|                                | Placebo Q4W ± MTX         | 22                  | 58.18            | 7.45*                         | 5.69       | 36.25*    | 1.38*    |           |
|                                | OKZ 60 mg Q2W ± MTX       | 20                  | 55.50            | 12.30*                        | 5.57       | 36.28*    | 1.63*    |           |
|                                | OKZ 120 mg Q2W ± MTX      | 22                  | 53.09            | 8.07*                         | 5.96       | 42.90*    | 1.44*    |           |
|                                | OKZ 240 mg Q2W ± MTX      | 23                  | 55.48            | 8.22*                         | 5.94       | 45.20*    | 1.75*    |           |

|                                                            |                       |    |       |        |      |        |       |  |
|------------------------------------------------------------|-----------------------|----|-------|--------|------|--------|-------|--|
|                                                            | OKZ 60 mg Q4W ± MTX   | 22 | 52.64 | 10.89* | 6.14 | 46.60* | 1.81* |  |
|                                                            | OKZ 120 mg Q4W ± MTX  | 23 | 53.52 | 11.58* | 5.61 | 39.92* | 1.50* |  |
|                                                            | OKZ 240 mg Q4W ± MTX  | 22 | 54.55 | 7.83*  | 5.83 | 40.50* | 1.69* |  |
|                                                            | TCZ 8 mg/kg Q4W ± MTX | 43 | 56.58 | 10.55* | 5.72 | 35.65* | 1.63* |  |
| TNF: Tumor Necrosis Factor<br>* numbers reported as median |                       |    |       |        |      |        |       |  |

Table S2.3.1.3: Baseline characteristics of trials investigating IL-6R/L blockers in patients with inadequate response or intolerance to csDMARDs or TNF-inhibitors.

| Study                                                                              | Treatment                  | No. of patients (n) | Mean age (years) | Mean disease duration (years) | Mean DAS28 | Mean CDAI | Mean HAQ | Mean mTSS |
|------------------------------------------------------------------------------------|----------------------------|---------------------|------------------|-------------------------------|------------|-----------|----------|-----------|
| Yazici 2012 (ROSE) (16)                                                            | Placebo + csDMARDs         | 205                 | 55.8             | 8.52                          | 6.55       |           | 4.00*    |           |
|                                                                                    | TCZ 8 mg/kg Q4W + csDMARDs | 409                 | 55.2             | 8.62                          | 6.53       |           | 4.07*    |           |
| Kivitz 2014 (BREVACTA) (17)                                                        | Placebo + csDMARDs         | 219                 | 52.0             | 11.1                          | 6.6        |           | 1.6      | 60.38     |
|                                                                                    | TCZ 162 mg Q2W + csDMARDs  | 437                 | 52.1             | 11.1                          | 6.7        |           | 1.6      | 59.01     |
| NCT00977106 (TORPEDO, not published) (18)                                          | Placebo + csDMARDs         | 50                  | 51.3             |                               |            |           |          |           |
|                                                                                    | TCZ 8 mg/kg Q4W + csDMARDs | 53                  | 52.8             |                               |            |           |          |           |
| * MDHAQ-PF, multidimensional health assessment questionnaire for physical function |                            |                     |                  |                               |            |           |          |           |

Table S2.3.1.4: Baseline characteristics of trials investigating IL-6R/L blockers vs. other bDMARDs (Head-to-Head trials).

| Study                                                                              | Treatment                | No. of patients (n) | Mean age (years) | Mean disease duration (years) | Mean DAS28 | Mean CDAI | Mean HAQ | Mean mTSS |
|------------------------------------------------------------------------------------|--------------------------|---------------------|------------------|-------------------------------|------------|-----------|----------|-----------|
| Gabay 2013 (ADACTA) (19)                                                           | ADA 40 mg Q2W            | 162                 | 53.3             | 6.3                           | 6.8        | 43.1      | 1.7      |           |
|                                                                                    | TCZ 8 mg/kg Q4W          | 163                 | 54.4             | 7.3                           | 6.7        | 40.8      | 1.6      |           |
| Burmester 2017 (MONARCH) (20)                                                      | ADA 40 mg Q2W            | 185                 | 53.6             | 6.6                           | 6.0        | 42.4      | 1.6      |           |
|                                                                                    | SAR 200 mg Q2W           | 184                 | 50.9             | 8.1                           | 6.0        | 43.6      | 1.6      |           |
| Taylor 2018 (SIRROUND-H) (21)                                                      | ADA 40mg Q2W             | 186                 | 52.6             | 4.00                          | 6.05       | 44.09     | 1.70     |           |
|                                                                                    | SRK 50 mg Q4W            | 186                 | 52.5             | 4.24                          | 6.12       | 44.62     | 1.75     |           |
|                                                                                    | SRK 100 mg Q2W           | 187                 | 49.              | 4.60                          | 6.08       | 45.39     | 1.62     |           |
| Weinblatt 2015 (22)                                                                | Placebo + MTX            | 61                  | 51.4             | 6.4                           | 6.1        |           | 1.6      |           |
|                                                                                    | ADA* 40 mg Q2W + MTX     | 59                  | 52.8             | 6.1                           | 6.3        |           | 1.9      |           |
|                                                                                    | CLZ 25 mg Q4W + MTX      | 59                  | 47.4             | 5.0                           | 5.7        |           | 1.5      |           |
|                                                                                    | CLZ 100 mg Q4W + MTX     | 60                  | 49.9             | 5.6                           | 5.8        |           | 1.5      |           |
|                                                                                    | CLZ 200 mg Q4W + MTX     | 60                  | 46.4             | 6.0                           | 5.8        |           | 1.4      |           |
|                                                                                    | CLZ 100 mg Q4W + Placebo | 60                  | 55.0             | 7.4                           | 5.9        |           | 1.6      |           |
|                                                                                    | CLZ 200 mg Q4W + Placebo | 59                  | 50.0             | 5.0                           | 6.1        |           | 1.7      |           |
| * adalimumab (40 mg) plus MTX was included as an active reference; ADA: adalimumab |                          |                     |                  |                               |            |           |          |           |

Table S2.3.1.5: Switch studies. Part 1: Baseline characteristics of trials investigating (switching) route of administration and dosage adaptation of IL-6R/L blockers.

| Study                                                                                                                                                            | Treatment                                                    | No. of patients (n) | Mean age (years) | Mean disease duration (years) | Mean DAS28 | Mean CDAI | Mean HAQ | Mean mTSS |
|------------------------------------------------------------------------------------------------------------------------------------------------------------------|--------------------------------------------------------------|---------------------|------------------|-------------------------------|------------|-----------|----------|-----------|
| Burmester 2014 (SUMMACTA) (23)                                                                                                                                   | TCZ SC 162 mg QW ± MTX                                       | 558                 | 52.4             | 8.7                           | 6.6        |           | 1.6      |           |
|                                                                                                                                                                  | TCZ IV 8 mg/kg Q4W ± MTX                                     | 537                 | 52.5             | 8.7                           | 6.7        |           | 1.7      |           |
| Ogata 2014 (MUSASHI) (24)                                                                                                                                        | TCZ SC 162 mg Q2W                                            | 159                 | 52.1             | 7.3                           | 6.1        | 34.2      | 1.18***  |           |
|                                                                                                                                                                  | TCZ IV 8 mg/kg Q4W                                           | 156                 | 51.8             | 8.0                           | 6.2        | 33.7      | 1.25***  |           |
| Ogata 2015 (MUSASHI-OLE) (25)                                                                                                                                    | TCZ SC/SC* 162 mg Q2W                                        | 159                 | 52.5             | 7.4                           | 6.1        |           |          |           |
|                                                                                                                                                                  | TCZ IV 8 mg/kg Q4W switched to TCZ SC 162 mg Q2W (TCZ IV/SC) | 160                 | 51.5             | 8.0                           | 6.2        |           |          |           |
| Ogata 2018 (SHINOBI) (26) **                                                                                                                                     | TCZ SC 162 mg QW                                             | 21                  | 56.4             | 9.7                           | 5.9        | 35.3      |          |           |
|                                                                                                                                                                  | TCZ SC 162 mg Q2W                                            | 20                  | 55.1             | 7.0                           | 5.5        | 31.5      |          |           |
| * TCZ SC/SC: continued TCZ-SC<br>** TCZ SC Q2W non-responders randomized to TCZ SC QW or TCZ SC Q2W<br>*** Japanese HAQ<br>IV: intravenously; SC: subcutaneously |                                                              |                     |                  |                               |            |           |          |           |

Table S2.3.1.6: Switch studies. Part 2: Baseline characteristics of trials investigating add-on versus switching to IL-6R blockers.

| Study                                                                                            | Treatment                                         | No. of patients (n) | Mean age (years) | Mean disease duration (years) | Mean DAS28 | Mean CDAI | Mean HAQ | Mean mTSS |
|--------------------------------------------------------------------------------------------------|---------------------------------------------------|---------------------|------------------|-------------------------------|------------|-----------|----------|-----------|
| Dougados 2013 (ACT-RAY) (27)                                                                     | add-on strategy arm:<br>TCZ 8 mg/kg Q4W + MTX     | 277                 | 53.0             | 8.2                           | 6.33       |           | 1.46     | 30.4*     |
|                                                                                                  | switch strategy arm:<br>TCZ 8 mg/kg Q4W + Placebo | 276                 | 53.6             | 8.3                           | 6.36       |           | 1.48     | 37.1*     |
| Dougados 2014 (ACT-RAY, 1-year) ** (28)                                                          | add-on strategy arm:<br>TCZ 8 mg/kg Q4W + MTX     | 277                 | 53.0             | 8.2                           | 6.33       |           | 1.46     | 30.8*     |
|                                                                                                  | switch strategy arm:<br>TCZ 8 mg/kg Q4W + Placebo | 276                 | 53.6             | 8.3                           | 6.36       |           | 1.48     | 37.2*     |
| Kaneko 2016 (SURPRISE) (29)                                                                      | add-on strategy arm:<br>TCZ 8 mg/kg Q4W + MTX     | 115                 | 55.8             | 3.6                           | 5.1        | 22.6      | 1.0      |           |
|                                                                                                  | switch strategy arm:<br>TCZ 8 mg/kg Q4W           | 111                 | 56.3             | 3.8                           | 5.3        | 24.2      | 1.0      |           |
| * Genant-modified Sharp score (GSS)                                                              |                                                   |                     |                  |                               |            |           |          |           |
| ** open-label csDMARDs other than MTX were added at week 24 or later in patients with DAS28 >3.2 |                                                   |                     |                  |                               |            |           |          |           |

Table S2.3.1.7: Switch studies. Part 3: Baseline characteristics of trials investigating switching to another IL-6R blocker.

| Study                                                                    | Treatment                                                               | No. of patients (n) | Mean age (years) | Mean disease duration (years) | Mean DAS28 | Mean CDAI | Mean HAQ | Mean mTSS |
|--------------------------------------------------------------------------|-------------------------------------------------------------------------|---------------------|------------------|-------------------------------|------------|-----------|----------|-----------|
| Emery 2020 (EXTEND, OLE) (30)*                                           | SAR 150 mg SC Q2W + csDMARDs                                            | 37                  | 53.5             | 12.9                          | 3.0        | 11.9      | 1.1      | 5.66      |
|                                                                          | SAR 200 mg SC Q2W + csDMARDs                                            | 38                  | 52.2             | 8.8                           | 3.0        | 13.0      | 1.2      |           |
|                                                                          | TCZ 4 mg/kg IV Q4W (no change in dose) + csDMARDs                       | 35                  | 51.2             | 9.1                           | 3.3        | 10.6      | 1.0      |           |
|                                                                          | TCZ 4→8 mg/kg IV Q4W + csDMARDs at wk 4, then continuing 8 mg/kg IV Q4W | 38                  | 50.1             | 11.5                          | 3.2        | 13.7      | 1.3      |           |
|                                                                          | All TCZ (including pat. changing dose after wk 4 of the RCT)            | 93                  | 50.4             | 9.9                           | 3.2        | 12.4      | 1.2      |           |
| * treatment during RCT, before switching to SAR 200 mg SC Q2W in the OLE |                                                                         |                     |                  |                               |            |           |          |           |

Table S2.3.1.8: Induction/Strategic studies. Part 1: Baseline characteristics of trials comparing the effectiveness of IL-6R blocker monotherapy and combination therapy with MTX in early RA.

| Study                                                                                                                                                                                                   | Treatment                        | No. of patients (n) | Mean age (years) | Mean disease duration (years) | Mean DAS28 | Mean CDAI | Mean HAQ | Mean mTSS |
|---------------------------------------------------------------------------------------------------------------------------------------------------------------------------------------------------------|----------------------------------|---------------------|------------------|-------------------------------|------------|-----------|----------|-----------|
| Burmester 2016 (FUNCTION) (31)                                                                                                                                                                          | Placebo + MTX                    | 287                 | 49.6             | 0.4                           | 6.6        |           | 1.48     | 5.66      |
|                                                                                                                                                                                                         | TCZ 4 mg/kg Q4W + MTX            | 288                 | 51.2             | 0.4                           | 6.7        |           | 1.62     | 7.72      |
|                                                                                                                                                                                                         | TCZ 8 mg/kg Q4W + MTX            | 290                 | 49.5             | 0.5                           | 6.7        |           | 1.50     | 6.17      |
|                                                                                                                                                                                                         | TCZ 8 mg/kg Q4W + Placebo        | 292                 | 49.9             | 0.5                           | 6.7        |           | 1.58     | 6.85      |
| Burmester 2017 (FUNCTION, 2-years) (32)*                                                                                                                                                                | Placebo + MTX pre-escape         | 142                 | 49.9             | 0.5                           | 6.7        |           | 1.5      | 7.04      |
|                                                                                                                                                                                                         | TCZ 4 mg/kg Q4W + MTX pre-escape | 95                  | 50.6             | 0.5                           | 6.9        |           | 1.7      | 8.31      |
| Bijlsma 2016 (U-ACT-EARLY) (33)                                                                                                                                                                         | Placebo + MTX                    | 108                 | 53.5             | < 0.1**                       | 5.1        |           | 1.1      | 0.0       |
|                                                                                                                                                                                                         | TCZ 8 mg/kg Q4W + MTX            | 106                 | 53.0             | < 0.1**                       | 5.2        |           | 1.1      | 0.0       |
|                                                                                                                                                                                                         | TCZ 8 mg/kg Q4W + Placebo        | 103                 | 55.0             | < 0.1**                       | 5.3        |           | 1.3      | 0.0       |
| * patients not receiving 8 mg/kg TCZ and not achieving Disease Activity Score-28 joints (DAS28-erythrocyte sedimentation rate (ESR)) $\leq$ 3.2 at week 52 switched to escape therapy (8 mg/kg TCZ+MTX) |                                  |                     |                  |                               |            |           |          |           |
| ** symptom duration                                                                                                                                                                                     |                                  |                     |                  |                               |            |           |          |           |

Table S2.3.1.9: Induction/Strategic studies. Part 2: Baseline characteristics of trials comparing the effectiveness of IL-6R blocker + MTX with conventional treatment in early RA.

| Study                                                                                                                                                                                                                                                                                                                                                                                                                             | Treatment                                  | No. of patients (n) | Mean age (years) | Mean disease duration (years) | Mean DAS28 | Mean CDAI | Mean HAQ | Mean mTSS |
|-----------------------------------------------------------------------------------------------------------------------------------------------------------------------------------------------------------------------------------------------------------------------------------------------------------------------------------------------------------------------------------------------------------------------------------|--------------------------------------------|---------------------|------------------|-------------------------------|------------|-----------|----------|-----------|
| Hetland 2020 (NORD-STAR) (34)                                                                                                                                                                                                                                                                                                                                                                                                     | MTX + active conventional treatment*       | 200                 | 54.6             | 0.5*                          | 5.1        | 28.6      | 1.1      |           |
|                                                                                                                                                                                                                                                                                                                                                                                                                                   | CZP 200 mg Q2W** + MTX                     | 203                 | 55.3             | 0.5*                          | 5.0        | 27.9      | 1        |           |
|                                                                                                                                                                                                                                                                                                                                                                                                                                   | ABA 125 mg QW + MTX                        | 204                 | 54.7             | 0.6*                          | 5.1        | 28.6      | 1.1      |           |
|                                                                                                                                                                                                                                                                                                                                                                                                                                   | TCZ IV 8 mg/kg Q4W (or SC 162 mg QW) + MTX | 188                 | 52.4             | 0.6*                          | 4.9        | 26.6      | 1.1      |           |
| <p>* active conventional treatment: (a) oral prednisolone (tapered from 20 to 5 mg/day in nine weeks) or (b) sulfasalazine (2 g/day) combined with hydroxychloroquine (35 mg/kg every week or 200 mg/day) and mandatory intra-articular triamcinolone hexacetonide injection (or equivalent)</p> <p>** CZP loading dose 400 mg at week 0, 2, and 4</p> <p>*** symptom duration</p> <p>CZP: certolizumab pegol; ABA: abatacept</p> |                                            |                     |                  |                               |            |           |          |           |



Table S2.3.1.10: Tapering studies. Part 1: Baseline characteristics of trials investigating tapering of csDMARDs while on IL-6R blocker therapy.

| Study                                                              | Treatment                                      | No. of patients (n) | Mean age (years) | Mean disease duration (years) | Mean DAS28 | Mean CDAI | Mean HAQ | Mean mTSS |
|--------------------------------------------------------------------|------------------------------------------------|---------------------|------------------|-------------------------------|------------|-----------|----------|-----------|
| Edwards 2018 (ACT-TAPER) (35)                                      | TCZ 8 mg/kg Q4W + Placebo (tapering MTX)       | 136                 | 54.4             | 7.9                           | 6.58       |           |          |           |
|                                                                    | TCZ 8 mg/kg Q4W + MTX (stable MTX)             | 136                 | 56.4             | 7.2                           | 6.61       |           |          |           |
| Kremer 2018 (COMP-ACT) (36)                                        | TCZ 162 mg QW/Q2W* + Placebo                   | 147                 | 54.6             | 6.8                           | 6.2        | 37.3      | 1.3      |           |
|                                                                    | TCZ 162 mg QW/Q2W* + MTX                       | 147                 | 56.4             | 6.8                           | 6.3        | 39.1      | 1.4      |           |
| Pablos 2019 (JUST-ACT) (37)                                        | TCZ 8 mg/kg Q4W + Placebo (switch to TCZ mono) | 82                  | 51.0             | 6.4                           | 2.0        |           | 0.7      |           |
|                                                                    | TCZ 8 mg/kg Q4W + MTX                          | 82                  | 50.2             | 5.8                           | 1.8        |           | 0.5      |           |
| Peterfy 2020 (COMP-ACT MRI Substudy) (38)                          | TCZ 162 mg QW/Q2W* + Placebo                   | 38                  | 54.2             | 6.8                           | 6.4        | 37.4      |          |           |
|                                                                    | TCZ 162 mg QW/Q2W* + MTX                       | 41                  | 58.3             | 7.0                           | 6.2        | 38.5      |          |           |
| * $\geq 100$ kg start QW; DAS28-ESR > 3.2 increase frequency to QW |                                                |                     |                  |                               |            |           |          |           |

Table S2.3.1.11: Tapering studies. Part 2: Baseline characteristics of trials investigating tapering of glucocorticoids while on IL-6R blocker therapy.

| Study                        | Treatment                                                                   | No. of patients (n) | Mean age (years) | Mean disease duration (years) | Mean DAS28 | Mean CDAI | Mean HAQ | Mean mTSS |
|------------------------------|-----------------------------------------------------------------------------|---------------------|------------------|-------------------------------|------------|-----------|----------|-----------|
| Burmester 2020 (SEMIRA) (39) | TCZ IV 8 mg/kg Q4W or SC 162 mg QW ± csDMARDs + Glucocorticoid tapering     | 131                 | 54.8             | 9.6                           | 1.88       | 5.5       |          |           |
|                              | TCZ IV 8 mg/kg Q4W or SC 162 mg QW ± csDMARDs + Glucocorticoid continuation | 128                 | 54.0             | 8.6                           | 1.95       | 5.7       |          |           |

Table S2.3.1.12: Tapering studies. Part 3: Baseline characteristics of trials investigating tapering of IL-6R blockers.

| Study                                         | Treatment                                      | No. of patients (n) | Mean age (years) | Mean disease duration (years) | Mean DAS28 | Mean CDAI | Mean HAQ | Mean mTSS |
|-----------------------------------------------|------------------------------------------------|---------------------|------------------|-------------------------------|------------|-----------|----------|-----------|
| Huizinga 2015 (ACT-RAY, 2 and 3-years) (40) * | add-on strategy arm: TCZ 8 mg/kg Q4W + MTX     | 277                 | 53.0             | 8.2                           | 6.33       |           | 1.46     | 36.9**    |
|                                               | switch strategy arm: TCZ 8 mg/kg Q4W + Placebo | 276                 | 53.6             | 8.3                           | 6.36       |           | 1.48     | 41.2**    |

|                                                                                                                                                                                                                                  |                                                                                       |     |      |     |     |  |      |  |
|----------------------------------------------------------------------------------------------------------------------------------------------------------------------------------------------------------------------------------|---------------------------------------------------------------------------------------|-----|------|-----|-----|--|------|--|
| Kaneko 2018<br>(SURPRISE, 2-years)<br>(41)                                                                                                                                                                                       | add-on arm (TCZ+MTX:<br>discontinuing TCZ → MTX<br>mono                               | 49  | 57.5 | 3.6 | 1.4 |  | 0.32 |  |
|                                                                                                                                                                                                                                  | switch arm (TCZ mono):<br>discontinuing TCZ → no<br>DMARD                             | 53  | 54.4 | 3.5 | 1.4 |  | 0.31 |  |
| Kedra 2019 (TOLEDO)<br>(42)                                                                                                                                                                                                      | TCZ (or ABA) maintenance at<br>full dose                                              | 116 |      |     |     |  |      |  |
|                                                                                                                                                                                                                                  | progressive injection interval<br>increase (by stage) up to<br>bDMARD discontinuation | 117 |      |     |     |  |      |  |
| <p>* week 52-104, patients in sustained clinical remission (DAS28-ESR &lt;2.6) discontinued TCZ. If sustained remission was maintained, csDMARDs, then MTX/PBO, were discontinued</p> <p>** GSS, Genant-modified Sharp Score</p> |                                                                                       |     |      |     |     |  |      |  |

## 2.3.2: Systemic juvenile idiopathic arthritis (sJIA)

Table S2.3.2.1: Baseline characteristics of trials investigating IL-6R/L blockers in sJIA.

| Study                                                                                                                                                                           | Treatment                                        | No. of patients (n) | Mean age (years) | Mean disease duration (years) | Criteria for active disease                                               | Fever (%) | Rash (%) | Mean CRP (mg/L) | Mean CHAQ | aSH*  | Poznanski score* | Steroids at baseline (%) |
|---------------------------------------------------------------------------------------------------------------------------------------------------------------------------------|--------------------------------------------------|---------------------|------------------|-------------------------------|---------------------------------------------------------------------------|-----------|----------|-----------------|-----------|-------|------------------|--------------------------|
| De Benedetti 2012 (TENDER) (43)<br>12-week RCT followed by a long-term extension                                                                                                | Placebo                                          | 37                  | 9.1              | 5.1                           | ≥5 active joints<br><br>or<br>≥2 active joints and fever (>38°C; ≥5 days) | 65        | 49       |                 | 1.7       |       |                  | 84                       |
|                                                                                                                                                                                 | TCZ IV 8mg/kg (if ≥30 kg) or 12mg/kg (<30kg) Q2W | 75                  | 10.0             | 5.2                           |                                                                           | 55        | 29       |                 | 1.7       |       |                  | 93                       |
| Malattia 2020 (44)                                                                                                                                                              | TCZ (TENDER trial)                               | aSH: n=47**         | 9.9              | 5.2                           | see TENDER (43)                                                           |           |          |                 | 1.6       | 24.60 |                  | 49                       |
|                                                                                                                                                                                 |                                                  | Poznanski: n=33**   | 8.4              | 4.8                           |                                                                           |           |          |                 | 1.6       |       | -2.38            | 36                       |
| CHAQ: Childhood Health Assessment Questionnaire; aSH: adapted Sharp–van der Heijde score; CRP: C-reactive protein<br>* numbers reported as median<br>** radiographic population |                                                  |                     |                  |                               |                                                                           |           |          |                 |           |       |                  |                          |

## 2.3.3: Polyarticular-course juvenile idiopathic arthritis (pcJIA)

Table S2.3.3.1: Baseline characteristics of trials investigating IL-6R/L blockers in pcJIA.

| Study                                                                                                    | Treatment                                                                                                                                                                                                                                                                                                              | No. of patients (n) | Mean age (years) | Mean disease duration (years) | Criteria for active disease  | Joints with active arthritis (n) | Joints with LOM (n) | Mean CRP (mg/L) | Mean CHAQ | aSH** | Poznanski score** | Steroids at baseline (%) |
|----------------------------------------------------------------------------------------------------------|------------------------------------------------------------------------------------------------------------------------------------------------------------------------------------------------------------------------------------------------------------------------------------------------------------------------|---------------------|------------------|-------------------------------|------------------------------|----------------------------------|---------------------|-----------------|-----------|-------|-------------------|--------------------------|
| Brunner 2015 (CHERISH) (45)                                                                              | <p><i>Part 1: 16-week open-label, lead-in period:</i></p> <p>TCZ 8 mg/kg (if body weight ≥30 kg) Q2W ± MTX or 10 mg or 8mg/kg (if weight &lt;30kg) Q2W ± MTX</p> <p><i>Part 2: pat. with ≥JIA- (ACR) 30 improvement entered double-blind, randomized 24-week, withdrawal phase:</i></p> <p>Continue TCZ or Placebo</p> | 188*                | 11.0*            | 4.2*                          | ≥ 5 active joints and MTX-IR | 20.3*                            | 17.6*               | 23.3*           | 1.4*      |       |                   | 46*                      |
| Malattia 2020 (44)                                                                                       | TCZ (CHERISH trial)                                                                                                                                                                                                                                                                                                    | aSH: n=45***        | 10.8             | 3.9                           | see<br>CHERISH<br>(45)       | 20.9                             | 14.8                |                 | 1.3       | 8.00  |                   | 42                       |
|                                                                                                          |                                                                                                                                                                                                                                                                                                                        | Poznanski: n=35***  | 9.9              | 3.2                           |                              | 21.7                             | 16.3                |                 | 1.3       |       | - 1.45            | 43                       |
| LOM: limitation of movement; MTX-IR: inadequate response to methotrexate<br>* baseline data study part 1 |                                                                                                                                                                                                                                                                                                                        |                     |                  |                               |                              |                                  |                     |                 |           |       |                   |                          |

\*\* numbers reported as median  
\*\*\* radiographic population

### 2.3.4: Adult-onset Still's disease (AoSD)

Table S2.3.4.1: Baseline characteristics of trials investigating IL-6R/L blockers in AoSD.

| Study                                                                                                                                                                                                                                                                  | Treatment      | No. of patients (n) | Mean age (years) | Mean disease duration (years) | Fever (%) | Skin rash (%) | Mean HAQ | SFS | Mean CRP (mg/dl) |
|------------------------------------------------------------------------------------------------------------------------------------------------------------------------------------------------------------------------------------------------------------------------|----------------|---------------------|------------------|-------------------------------|-----------|---------------|----------|-----|------------------|
| Kaneko 2018 (46)                                                                                                                                                                                                                                                       | Placebo        | 13                  | 55.5             | 0.1                           | 46.2      | 53.8          | 1.0      | 5.1 | 4.7              |
|                                                                                                                                                                                                                                                                        | TCZ 8mg/kg Q2W | 13                  | 51.3             | 0.5                           | 46.2      | 61.5          | 0.7      | 4.6 | 4.2              |
| SFS: systemic feature score (consists of five clinical and five laboratory assessments; clinical assessment include fever, rash, lymphadenopathy, hepatosplenomegaly and serositis; laboratory aspects include ESR, CRP, leucocyte count, hb level and platelet count) |                |                     |                  |                               |           |               |          |     |                  |

## 2.3.5: Giant cell arteritis (GCA)

Table S2.3.5.1: Baseline characteristics of trials investigating IL-6R/L blockers in GCA.

| Study                             | Treatment                          | No. of patients (n) | Mean age (years) | GCA newly diagnosed (%) | Mean disease duration (years) | Cranial signs or symptoms (%) | PMR symptoms (%) | Mean CRP (mg/dl) | Mean ESR (mm/h) |
|-----------------------------------|------------------------------------|---------------------|------------------|-------------------------|-------------------------------|-------------------------------|------------------|------------------|-----------------|
| Stone 2017 (GiACTA) (47)          | Placebo + GC-26-Wk Taper           | 50                  | 69.3             | 46                      | 1                             | 80                            | 60               |                  | 28.8            |
|                                   | Placebo + GC-52-Wk Taper           | 51                  | 67.8             | 45                      | 0.7                           | 78                            | 69               |                  | 24.2            |
|                                   | TCZ 162 mg SC QW + GC-26-Wk taper  | 100                 | 69.5             | 47                      | 0.8                           | 78                            | 59               |                  | 24.6            |
|                                   | TCZ 162 mg SC Q2W + GC-26-Wk taper | 50                  | 69.4             | 52                      | 0.7                           | 82                            | 64               |                  | 20.8            |
| Stone 2019 (3-year analysis) (48) | Pooled Placebo (new onset)         | 46                  |                  |                         |                               |                               |                  |                  |                 |
|                                   | Pooled Placebo (relapsing)         | 55                  |                  |                         |                               |                               |                  |                  |                 |
|                                   | TCZ QW (new onset)                 | 47                  |                  |                         |                               |                               |                  |                  |                 |
|                                   | TCZ QW (relapsing)                 | 53                  |                  |                         |                               |                               |                  |                  |                 |
|                                   | TCZ Q2W (new onset)                | 26                  |                  |                         |                               |                               |                  |                  |                 |
|                                   | TCZ Q2W (relapsing)                | 23                  |                  |                         |                               |                               |                  |                  |                 |
| Calderón-Goercke 2019 (49)        | TCZ IV                             | 104                 | 73.4             |                         |                               |                               |                  | 3.3              | 41.8            |
|                                   | TCZ SC                             | 30                  | 71.9             |                         |                               |                               |                  | 2.1              | 35.9            |
| Schmidt 2020 (50)                 | Placebo + GC-6-month Taper         | 27                  | 71.6             | 59.3                    |                               |                               | 40.7             |                  |                 |



|                                                                                                       |                                   |    |      |      |  |  |      |  |  |
|-------------------------------------------------------------------------------------------------------|-----------------------------------|----|------|------|--|--|------|--|--|
|                                                                                                       | Placebo + GC-12-month Taper       | 27 | 70.7 | 55.6 |  |  | 48.1 |  |  |
|                                                                                                       | SRK 50 mg Q4W + GC-6-month Taper  | 26 | 67.5 | 46.2 |  |  | 61.5 |  |  |
|                                                                                                       | SRK 100 mg Q2W + GC-3-month Taper | 39 | 68.1 | 56.4 |  |  | 56.4 |  |  |
|                                                                                                       | SRK 100 mg Q2W + GC-6-month Taper | 42 | 70.5 | 59.5 |  |  | 59.5 |  |  |
| PMR: polymyalgia rheumatica; ESR: erythrocyte sedimentation rate; GC: glucocorticoid (i.e prednisone) |                                   |    |      |      |  |  |      |  |  |

## 2.3.6: Takayasu arteritis (TAK)

Table S2.3.6.1: Baseline characteristics of trials investigating IL-6R/L blockers in TAK.

| Study                                                                                                                                                                                                                 | Treatment                 | No. of patients (n) | Mean age (years) | Mean disease duration (years) | Mean CRP (mg/dl) | Mean GC dose (mg/kg) | HLA-B52 positive (%) |
|-----------------------------------------------------------------------------------------------------------------------------------------------------------------------------------------------------------------------|---------------------------|---------------------|------------------|-------------------------------|------------------|----------------------|----------------------|
| Nakaoka 2018 (the TAKT study) (51)                                                                                                                                                                                    | Placebo + GC Taper*       | 18                  | 30.8             | 3.57                          |                  | 0.52                 | 72.2                 |
|                                                                                                                                                                                                                       | TCZ 162 mg QW + GC taper* | 18                  | 31.1             | 6.46                          |                  | 0.57                 | 38.9                 |
| * relapsing patients were induced into remission with oral glucocorticoid (GC) therapy; after randomization GC were tapered 10% per week from week 4 to a minimum of 0.1mg/kg per day<br>HLA: human leucocyte antigen |                           |                     |                  |                               |                  |                      |                      |

### 2.3.7: Multicentric Castleman's disease (MCD)

Table S2.3.7.1: Baseline characteristics of trials investigating IL-6R/L blockers in MCD.

| Study                                                                                                                                                                                                                                                                        | Treatment             | No. of patients (n) | Age* (years) | Disease duration (years)* | Overall symptom score | Steroids at baseline (%) | Hb level (g/l)* | CRP (mg/l)* | ESR (mm/h)* | Albumin (g/l)* |
|------------------------------------------------------------------------------------------------------------------------------------------------------------------------------------------------------------------------------------------------------------------------------|-----------------------|---------------------|--------------|---------------------------|-----------------------|--------------------------|-----------------|-------------|-------------|----------------|
| Van Rhee 2014 (52)                                                                                                                                                                                                                                                           | Placebo + BSC         | 26                  | 48           |                           | 10                    | 35                       | 134             | 4.2         | 23.5        | 36             |
|                                                                                                                                                                                                                                                                              | SIL 11mg/kg Q3W + BSC | 53                  | 47           |                           | 6                     | 25                       | 118             | 17.6        | 62.0        | 35             |
| <p>* numbers reported as median<br/>           Hb: haemoglobin; BSC: best supportive care (management of disease related symptoms as well as conditions, infections, and infusion-related reactions referred to institutional guidelines, transfusions); SIL: siltuximab</p> |                       |                     |              |                           |                       |                          |                 |             |             |                |

## 2.3.8: CAR-T cell induced Cytokine Release Syndrome (CRS)

Table S2.3.8.1: Baseline characteristics of trials investigating IL-6R/L blockers in CRS.

| Study                                                                                                                                                                               | Treatment                             | (CAR) T-cell therapy                     | No. of patients (n) | Age (years)* | Underlying malignancy (%)                 | 1 dose of TCZ (%) | ≥3 doses of TCZ (%) | Baseline CRS grade 3 (%) | Baseline CRS grade 4 (%) |
|-------------------------------------------------------------------------------------------------------------------------------------------------------------------------------------|---------------------------------------|------------------------------------------|---------------------|--------------|-------------------------------------------|-------------------|---------------------|--------------------------|--------------------------|
| Le 2018 (53)                                                                                                                                                                        | TCZ 8 mg/kg (12 mg/kg for pts <30 kg) | CTL019 (Tisagenlecleucel) series         | 45                  | 12           | ALL (100)                                 | 55.5              | 15.6                | 22.2                     | 77.8                     |
|                                                                                                                                                                                     |                                       | KTE-C19 (Axicabtagene Ciloleucel) series | 15                  | 60           | ALL (13.3)<br>DLBCL (80.0)<br>PMBCL (6.7) | 40.0              | 26.7                | 93.3                     | 6.7                      |
| * numbers reported as median<br>CAR: chimeric antigen receptor; ALL: acute lymphoblastic leukemia; DLBCL: diffuse large B cell lymphoma; PMBCL: primary mediastinal B cell lymphoma |                                       |                                          |                     |              |                                           |                   |                     |                          |                          |

## 2.3.9: Neuromyelitis optica spectrum disorders (NMOSD)

Table S2.3.9.1: Baseline characteristics of trials investigating IL-6R/L blockers in NMOSD.

| Study                                                                                                                                                                                                                                                                      | Treatment                                                                                  | No. of patients (n) | Mean age (years) | Mean disease duration (years) | AQP4-IgG positivity (%) | EDSS score | Annualized relapse rate |
|----------------------------------------------------------------------------------------------------------------------------------------------------------------------------------------------------------------------------------------------------------------------------|--------------------------------------------------------------------------------------------|---------------------|------------------|-------------------------------|-------------------------|------------|-------------------------|
| Zhang 2020 (TANGO) (54)                                                                                                                                                                                                                                                    | AZA (2-3mg/kg) ± concomitant immunosuppressants                                            | 59                  | 45.3             | 6.2                           | 90                      | 4.5        | 1.68*                   |
|                                                                                                                                                                                                                                                                            | TCZ 8mg/kg Q4W + concomitant immunosuppressants for the first 12 wks; then TCZ monotherapy | 59                  | 48.1             | 6.0                           | 85                      | 4.5        | 1.71*                   |
| Yamamura 2019 (SAkuraStar) (55)                                                                                                                                                                                                                                            | Placebo + concomitant immunosuppressants                                                   | 42                  | 43.4             |                               | 67                      | 3.63       | 1.4*                    |
|                                                                                                                                                                                                                                                                            | SAT SC 120 mg wk 0, 2, 4; then Q4W + concomitant immunosuppressants                        | 41                  | 40.8             |                               | 66                      | 3.83       | 1.5*                    |
| Trabouisee 2020 (56)                                                                                                                                                                                                                                                       | Placebo                                                                                    | 32                  | 40.5             | 214.7**                       | 72                      | 3.7        | 1.5                     |
|                                                                                                                                                                                                                                                                            | SAT SC 120 mg wk 0, 2, 4 and Q4W                                                           | 63                  | 45.3             | 317.8**                       | 65                      | 3.9        | 1.4                     |
| <p>* annualized relapse rate in previous 2 years<br/> ** mean disease duration in weeks<br/> AZA: azathioprine; AQP4-IgG: aquaporin-4 autoantibody; EDSS: Expanded Disability Status Scale, ranging from 0 (normal neurologic status) to 10 (death); SAT: satralizumab</p> |                                                                                            |                     |                  |                               |                         |            |                         |

## 2.4. Efficacy outcomes

### 2.4.1: Rheumatoid arthritis (RA)

Table S2.4.1.1: Efficacy outcomes of trials investigating IL-6R/L blockers + MTX or csDMARDs versus placebo in patients with inadequate response or intolerance to MTX or csDMARDs.

| Study                               | Treatment                       | No. of patients (n) | Timepoint (weeks) | ACR20 (%) | ACR50 (%) | ACR70 (%) | DAS28 <2.6 (%) | CDAI ≤2.8 (%) | ACR/EULAR Boolean rem. (%) | ΔHAQ (mean)        | ΔmTSS (mean)      |
|-------------------------------------|---------------------------------|---------------------|-------------------|-----------|-----------|-----------|----------------|---------------|----------------------------|--------------------|-------------------|
| Huizinga 2014 (MOBILITY Part A) (1) | Placebo + MTX                   | 52                  | 12                | 46        | 15        | 2         | 9              |               |                            | -0.26              |                   |
|                                     | SAR 100 mg Q2W + MTX            | 51                  |                   | 49        | 22        | 6         | 8              |               |                            | -0.35              |                   |
|                                     | SAR 150 mg Q2W + MTX            | 51                  |                   | 67        | 35        | 12        | 20             |               |                            | -0.62              |                   |
|                                     | SAR 100 mg QW + MTX             | 50                  |                   | 62        | 40        | 16        | 20             |               |                            | -0.42              |                   |
|                                     | SAR 200 mg Q2W + MTX            | 52                  |                   | 65        | 40        | 17        | 26             |               |                            | -0.57              |                   |
|                                     | SAR 150 mg QW + MTX             | 50                  |                   | 72        | 30        | 16        | 30             |               |                            | -0.45              |                   |
| Genovese 2015 (MOBILITY Part B) (2) | Placebo + MTX                   | 398                 | 24                | 33.4      | 17        | 7         | 10.1           | 5.0           |                            | -0.29 <sup>a</sup> | 2.78 <sup>b</sup> |
|                                     | SAR 150 mg Q2W + MTX            | 400                 |                   | 58.0      | 37        | 20        | 27.8           | 10.3          |                            | -0.53 <sup>a</sup> | 0.90 <sup>b</sup> |
|                                     | SAR 200 mg Q2W + MTX            | 399                 |                   | 66.4      | 46        | 25        | 34.1           | 13.8          |                            | -0.55 <sup>a</sup> | 0.25 <sup>b</sup> |
| Tanaka 2019 (KAKEHASI) (3)          | Placebo to SAR 150 mg Q2W + MTX | 42                  | 24                | 14.8      | 9.9       | 3.7       | 7.4            | 1.2           |                            | -0.3               |                   |
|                                     | Placebo to SAR 200 mg Q2W + MTX | 40                  |                   |           |           |           |                |               |                            |                    |                   |

|                                      |                                  |     |    |      |                   |      |                 |                  |     |                    |  |
|--------------------------------------|----------------------------------|-----|----|------|-------------------|------|-----------------|------------------|-----|--------------------|--|
|                                      | SAR 150 mg Q2W + MTX             | 81  |    | 67.9 | 43.2              | 18.5 | 35.8            | 6.2              |     | -0.5               |  |
|                                      | SAR 200 mg Q2W + MTX             | 80  |    | 57.5 | 38.8              | 15.0 | 40.0            | 10.0             |     | -0.6               |  |
| Mazurov 2020<br>(AURORA, 1-year) (4) | LVL (BCD-089) 162 mg QW + MTX    | 35  | 52 | 91.4 | 74.3              | 65.7 |                 |                  |     |                    |  |
|                                      | LVL (BCD-089) 162 mg Q2W + MTX   | 35  |    | 71.4 | 65.7              | 45.7 |                 |                  |     |                    |  |
| NCT02309359 (not published) (5)      | Placebo + MTX                    | 69  | 12 | 62.3 | 27.5              | 8.7  | 8.7             | 4.3              | 4.3 | -0.613             |  |
|                                      | ALX-0061 75 mg Q4W + MTX         | 69  |    | 75.4 | 29.0              | 14.5 | 4.3             | 4.3              | 0.0 | -0.696             |  |
|                                      | ALX-0061 150 mg Q4W + MTX        | 70  |    | 81.4 | 44.3              | 21.4 | 37.1            | 10.0             | 7.1 | -0.619             |  |
|                                      | ALX-0061 150 mg Q2W + MTX        | 68  |    | 77.9 | 41.2              | 19.1 | 22.1            | 5.9              | 2.9 | -0.771             |  |
|                                      | ALX-0061 225 mg Q2W + MTX        | 69  |    | 72.5 | 44.9              | 17.4 | 30.4            | 7.2              | 5.8 | -0.615             |  |
| NCT02287922 (not published) (6)      | ALX-0061 150 mg Q4W Mono         | 62  | 12 | 72.6 | 43.5              | 16.1 | 33.9            | 9.7              | 3.2 | -0.541             |  |
|                                      | ALX-0061 150 mg Q2W Mono         | 62  |    | 77.4 | 37.1              | 24.2 | 21.0            | 4.8              | 4.8 | -0.746             |  |
|                                      | ALX-0061 225 mg Q2W Mono         | 63  |    | 81.0 | 49.2              | 20.6 | 39.7            | 6.3              | 6.3 | -0.817             |  |
|                                      | TCZ 162 mg QW or Q2W             | 64  |    | 78.1 | 45.3              | 23.4 | 25.0            | 9.4              | 6.3 | -0.689             |  |
| Nasonov 2020<br>(CREDO-1) (7)        | Placebo + MTX                    | 143 | 12 | 25.9 | 7.7 <sup>c</sup>  |      |                 | 0 <sup>c</sup>   |     | -0.20              |  |
|                                      | OKZ 64 mg Q2W + MTX              | 143 |    | 63.6 | 42.7 <sup>c</sup> |      |                 | 8.4 <sup>c</sup> |     | -0.54              |  |
|                                      | OKZ 64 mg Q4W + MTX              | 142 |    | 70.4 | 48.6 <sup>c</sup> |      |                 | 7.7 <sup>c</sup> |     | -0.56              |  |
| Mease 2012 (8)                       | Placebo + MTX                    | 33  | 12 | 27   | 9                 | 3    | 0 <sup>a</sup>  |                  |     | -0.47 <sup>a</sup> |  |
|                                      | CLZ 80 mg (day 1 and wk 8) + MTX | 32  |    | 81   | 34                | 13   | 14 <sup>a</sup> |                  |     | -0.57 <sup>a</sup> |  |

|                                                                                                                                      |                                   |     |    |      |      |      |                   |                  |  |  |                    |                   |
|--------------------------------------------------------------------------------------------------------------------------------------|-----------------------------------|-----|----|------|------|------|-------------------|------------------|--|--|--------------------|-------------------|
|                                                                                                                                      | CLZ 160 mg (day 1 and wk 8) + MTX | 33  |    | 71   | 27   | 12   | 28 <sup>a</sup>   |                  |  |  | -0.58 <sup>a</sup> |                   |
|                                                                                                                                      | CLZ 320 mg (day 1 and wk 8) + MTX | 29  |    | 82   | 50   | 25   | 44 <sup>a</sup>   |                  |  |  | -0.67 <sup>a</sup> |                   |
| Baek 2019 (9)                                                                                                                        | Placebo + csDMARDs                | 48  | 24 | 16.7 | 2.1  | 2.1  | 3.3               |                  |  |  | -0.2               |                   |
|                                                                                                                                      | TCZ 8 mg/kg Q4W + csDMARDs        | 47  |    | 61.7 | 29.8 | 4.3  | 42.5              |                  |  |  | -0.3               |                   |
| NCT00773461 (not published) (10)                                                                                                     | Placebo + csDMARDs                | 69  | 24 | 24.6 | 10.1 | 2.9  | 3.1               |                  |  |  | -0.06              |                   |
|                                                                                                                                      | TCZ 8 mg/kg Q4W + csDMARDs        | 139 |    | 69.8 | 38.8 | 12.9 | 30.5              |                  |  |  | -0.52              |                   |
| Takeuchi 2017 (SIRROUND-D) (11)                                                                                                      | Placebo + csDMARDs                | 556 | 16 | 26   | 10.8 | 4.0  | 5.6 <sup>c</sup>  | 3.1 <sup>c</sup> |  |  | -0.22 <sup>c</sup> | 1.96 <sup>c</sup> |
|                                                                                                                                      | SRK 50 mg Q4W + csDMARDs          | 557 |    | 55   | 30.0 | 13.5 | 26.0 <sup>c</sup> | 7.0 <sup>c</sup> |  |  | -0.43 <sup>c</sup> | 0.35 <sup>c</sup> |
|                                                                                                                                      | SRK 100 mg Q2W + csDMARDs         | 557 |    | 54   | 26.2 | 13.5 | 25.5 <sup>c</sup> | 8.4 <sup>c</sup> |  |  | -0.46 <sup>c</sup> | 0.30 <sup>c</sup> |
| <sup>a</sup> efficacy outcome at week 16<br><sup>b</sup> radiographic outcome at week 52<br><sup>c</sup> efficacy outcome at week 24 |                                   |     |    |      |      |      |                   |                  |  |  |                    |                   |

Table S2.4.1.2: Efficacy outcomes of trials investigating IL-6R/L blockers in patients with inadequate response or intolerance to TNF-inhibitors.

| Study | Treatment          | No. of patients (n) | Timepoint (weeks) | ACR20 (%) | ACR50 (%) | ACR70 (%) | DAS28 <2.6 (%) | CDAI ≤2.8 (%) | ACR/EULAR Boolean rem. (%) | ΔHAQ (mean) | ΔmTSS (mean) |
|-------|--------------------|---------------------|-------------------|-----------|-----------|-----------|----------------|---------------|----------------------------|-------------|--------------|
|       | Placebo + csDMARDs | 181                 | 24                | 33.7      | 18.2      | 7.2       | 7.2            |               |                            | -0.3        |              |



|                                         |                           |     |    |      |      |      |      |  |     |                    |  |
|-----------------------------------------|---------------------------|-----|----|------|------|------|------|--|-----|--------------------|--|
| Fleischmann 2017 (TARGET) (12)          | SAR 150 mg Q2W + csDMARDs | 181 |    | 55.8 | 37.0 | 19.9 | 24.9 |  |     | -0.5               |  |
|                                         | SAR 200 mg Q2W + csDMARDs | 184 |    | 60.9 | 40.8 | 16.3 | 28.8 |  |     | -0.6               |  |
| Takeuchi 2016 (RA0083) (13)             | Placebo + MTX             | 29  | 12 | 21.9 | 8.6  | 3.8  | 3.4  |  |     | 0                  |  |
|                                         | OKZ 60 mg Q4W + MTX       | 32  |    | 58.7 | 35.7 | 9.6  | 21.9 |  |     | -0.4               |  |
|                                         | OKZ 120 mg Q4W + MTX      | 32  |    | 62.5 | 42.1 | 22.5 | 40.6 |  |     | -0.4               |  |
|                                         | OKZ 240 mg Q4W + MTX      | 26  |    | 73.8 | 39.1 | 17.1 | 53.8 |  |     | -0.4               |  |
| Aletaha 2017 (SIRROUND-T) (14)          | Placebo ± csDMARDs        | 294 | 16 | 24   | 9    | 3    | 5.8  |  | 1   | -0.12              |  |
|                                         | SRK 50 mg Q4W ± csDMARDs  | 292 |    | 40   | 21   | 6    | 17.5 |  | 1.7 | -0.25              |  |
|                                         | SRK 100 mg Q2W ± csDMARDs | 292 |    | 45   | 22   | 10   | 15.8 |  | 3.1 | -0.32              |  |
| Genovese 2014 (15)                      | Placebo Q2W ± MTX         | 22  | 12 | 29.9 | 4.9  |      | 4.5  |  |     | 0.0 <sup>a</sup>   |  |
|                                         | Placebo Q4W ± MTX         | 22  |    | 17.1 | 1.3  |      | 0.0  |  |     | 0.06 <sup>a</sup>  |  |
|                                         | OKZ 60 mg Q2W ± MTX       | 20  |    | 49.7 | 19.1 |      | 10.0 |  |     | -0.25 <sup>a</sup> |  |
|                                         | OKZ 120 mg Q2W ± MTX      | 22  |    | 55.5 | 24.9 |      | 13.6 |  |     | -0.25 <sup>a</sup> |  |
|                                         | OKZ 240 mg Q2W ± MTX      | 23  |    | 55.5 | 31.9 |      | 26.1 |  |     | -0.38 <sup>a</sup> |  |
|                                         | OKZ 60 mg Q4W ± MTX       | 22  |    | 60.7 | 33.2 |      | 13.6 |  |     | -0.50 <sup>a</sup> |  |
|                                         | OKZ 120 mg Q4W ± MTX      | 23  |    | 58.4 | 21.3 |      | 21.7 |  |     | -0.25 <sup>a</sup> |  |
|                                         | OKZ 240 mg Q4W ± MTX      | 22  |    | 32.5 | 11.5 |      | 9.1  |  |     | 0.0 <sup>a</sup>   |  |
|                                         | TCZ 8 mg/kg Q4W ± MTX     | 43  |    | 68.3 | 27.7 |      | 20.9 |  |     | -0.25 <sup>a</sup> |  |
| <sup>a</sup> numbers reported as median |                           |     |    |      |      |      |      |  |     |                    |  |

Table S2.4.1.3: Efficacy outcomes of trials investigating IL-6R/L blockers in patients with inadequate response or intolerance to csDMARDs or TNF-inhibitors.

| Study                                     | Treatment                  | No. of patients (n) | Timepoint (weeks) | ACR20 (%) | ACR50 (%) | ACR70 (%) | DAS28 <2.6 (%) | CDAI ≤2.8 (%) | ACR/EULAR Boolean rem. (%) | ΔHAQ (mean) | ΔmTSS (mean) |
|-------------------------------------------|----------------------------|---------------------|-------------------|-----------|-----------|-----------|----------------|---------------|----------------------------|-------------|--------------|
| Yazici 2012 (ROSE) (16)                   | Placebo + csDMARDs         | 205                 | 24                |           | 11.2      |           |                |               |                            |             |              |
|                                           | TCZ 8 mg/kg Q4W + csDMARDs | 409                 |                   |           | 30.1      |           |                |               |                            |             |              |
| Kivitz 2014 (BREVACTA) (17)               | Placebo + csDMARDs         | 219                 | 24                | 31.5      | 12        | 5         | 4              |               |                            |             | 1.23         |
|                                           | TCZ 162 mg Q2W + csDMARDs  | 437                 |                   | 60.9      | 40        | 20        | 32             |               |                            |             | 0.62         |
| NCT00977106 (TORPEDO, not published) (18) | Placebo + csDMARDs         | 50                  | 4                 |           |           |           |                |               |                            |             |              |
|                                           | TCZ 8 mg/kg Q4W + csDMARDs | 53                  |                   |           |           |           |                |               |                            |             |              |

Table S2.4.1.4: Efficacy outcomes of trials investigating IL-6R/L blockers vs. other bDMARDs (Head-to-Head trials).

| Study                                    | Treatment                | No. of patients (n) | Timepoint (weeks) | ACR20 (%) | ACR50 (%) | ACR70 (%)         | DAS28 <2.6 (%) | CDAI ≤2.8 (%)     | ACR/EULAR Boolean rem. (%) | ΔHAQ (mean)        | ΔmTSS (mean) |
|------------------------------------------|--------------------------|---------------------|-------------------|-----------|-----------|-------------------|----------------|-------------------|----------------------------|--------------------|--------------|
| Gabay 2013 (ADACTA) (19)                 | ADA 40 mg Q2W            | 162                 | 24                | 49.4      | 27.8      | 17.9              | 10.5           | 9.3 <sup>a</sup>  |                            | -0.5               |              |
|                                          | TCZ 8 mg/kg Q4W          | 163                 |                   | 65.0      | 47.2      | 32.5              | 39.9           | 17.2 <sup>a</sup> |                            | -0.7               |              |
| Burmester 2017 (MONARCH) (20)            | ADA 40 mg Q2W            | 185                 | 24                | 58.4      | 29.7      | 11.9              | 7.0            | 2.7               |                            | -0.43              |              |
|                                          | SAR 200 mg Q2W           | 184                 |                   | 71.7      | 45.7      | 23.4              | 26.6           | 7.1               |                            | -0.61              |              |
| Taylor 2018 (SIRROUND-H) (21)            | ADA 40mg Q2W             | 186                 | 24                | 56.5      | 31.7      | 12.9              | 7.5            |                   | 3.8                        | -0.52              |              |
|                                          | SRK 50 mg Q4W            | 186                 |                   | 53.8      | 26.9      | 11.8              | 12.9           |                   | 3.8                        | -0.51              |              |
|                                          | SRK 100 mg Q2W           | 187                 |                   | 58.8      | 35.3      | 15.5              | 20.3           |                   | 3.7                        | -0.53              |              |
| Weinblatt 2015 (22)                      | Placebo + MTX            | 61                  | 12                | 39.3      |           | 6.6 <sup>b</sup>  | 1.6            | 3.3               | 3.3                        | -0.62 <sup>b</sup> |              |
|                                          | ADA 40 mg Q2W + MTX      | 59                  |                   | 76.3      |           | 18.6 <sup>b</sup> | 20.3           | 8.5               | 5.1                        | -0.66 <sup>b</sup> |              |
|                                          | CLZ 25 mg Q4W + MTX      | 59                  |                   | 76.3      |           | 27.1 <sup>b</sup> | 35.6           | 11.9              | 8.5                        | -0.68 <sup>b</sup> |              |
|                                          | CLZ 100 mg Q4W + MTX     | 60                  |                   | 73.3      |           | 40.0 <sup>b</sup> | 35.0           | 8.3               | 10.0                       | -0.79 <sup>b</sup> |              |
|                                          | CLZ 200 mg Q4W + MTX     | 60                  |                   | 60.0      |           | 30.0 <sup>b</sup> | 26.7           | 3.3               | 5.0                        | -0.71 <sup>b</sup> |              |
|                                          | CLZ 100 mg Q4W + Placebo | 60                  |                   | 55.0      |           | 16.7 <sup>b</sup> | 21.7           | 8.3               | 6.7                        | -0.64 <sup>b</sup> |              |
|                                          | CLZ 200 mg Q4W + Placebo | 59                  |                   | 61.0      |           | 25.4 <sup>b</sup> | 25.4           | 3.4               | 1.7                        | -0.60 <sup>b</sup> |              |
| <sup>a</sup> post-hoc analysis           |                          |                     |                   |           |           |                   |                |                   |                            |                    |              |
| <sup>b</sup> efficacy outcome at week 24 |                          |                     |                   |           |           |                   |                |                   |                            |                    |              |

Table S2.4.1.5: Switch studies. Part 1: Efficacy outcomes of trials investigating (switching) route of administration and dosage adaptation of IL-6R/L blockers.

| Study                          | Design           | Primary / Secondary outcome                                                                                                                                                           | Timepoint (weeks) | Treatment arm                | No. of patients (n) | Result                                                                    | p / 95% CI                                                                                                                                             |
|--------------------------------|------------------|---------------------------------------------------------------------------------------------------------------------------------------------------------------------------------------|-------------------|------------------------------|---------------------|---------------------------------------------------------------------------|--------------------------------------------------------------------------------------------------------------------------------------------------------|
| Burmester 2014 (SUMMACTA) (23) | NI (margin: 12%) | ACR20 response; ACR50/70 response, %DAS28-ESR<2.6, %of decrease $\geq$ 0.3 from baseline in HAQ                                                                                       | 24                | TCZ SC 162 mg QW $\pm$ MTX   | 558                 | 69.4%; 47%, 24%, 38%, 65%                                                 | PE: ACR20: -4.0% (CI:-9.2, 1.2)<br>ACR50/70: -1.8% (CI:-7.5, 4.0) /-3.8% (CI:-9.0, 1.3)<br>DAS28-rem: 0.9% (CI:-5.0, 6.8)<br>HAQ: -2.3% (CI:-8.1, 3.4) |
|                                |                  |                                                                                                                                                                                       |                   | TCZ IV 8 mg/kg Q4W $\pm$ MTX | 537                 | 73.4%; 49%, 28%, 36%, 67%                                                 |                                                                                                                                                        |
| Ogata 2014 (MUSASHI) (24)      | NI (margin: 18%) | ACR20 response; ACR50/70 response, ACR/EULAR Boolean remission, CDAI $\leq$ 2.8, DAS28-ESR<2.6, mean $\Delta$ DAS28, mean $\Delta$ CDAI, %of decrease $\geq$ 0.3 from baseline in HAQ | 24                | TCZ SC 162 mg Q2W            | 159                 | 79.2%; 63.5%, 37.1%, 15.7%, 16.4%, 49.7%, 6.1 to 2.8, 34.2 to 10.3, 56.6% | PE: ACR20: -9.4% (CI:-17.6, -1.2)<br>ACR50/70: -4.3% (CI:-14.7, 6.0)/-3.8% (CI -14.5, 6.8)                                                             |
|                                |                  |                                                                                                                                                                                       |                   | TCZ IV 8 mg/kg Q4W           | 156                 | 88.5%; 67.3%, 41.0%, 16.0%, 23.1%, 62.2%, 6.2 to 2.5, 33.7 to 8.2, 67.9%  |                                                                                                                                                        |
|                                | OLE              | Mean DAS28-ESR, mean CDAI, ACR20/50/70 response,                                                                                                                                      |                   | TCZ SC/SC* 162 mg Q2W        | 159                 | 2.6, 9.6, 86.1%, 65.8%, 39.9%, 57.0%                                      | NR                                                                                                                                                     |

|                                                                                                                                                                                         |                     |                                                                     |                             |                                                              |     |                                                |                                                                                                                      |
|-----------------------------------------------------------------------------------------------------------------------------------------------------------------------------------------|---------------------|---------------------------------------------------------------------|-----------------------------|--------------------------------------------------------------|-----|------------------------------------------------|----------------------------------------------------------------------------------------------------------------------|
| Ogata 2015 (MUSASHI-OLE) (25)                                                                                                                                                           |                     | %DAS28-ESR<2.6, CDAI ≤2.8 <sup>a</sup> , CDAI >2.8-≤10 <sup>a</sup> | 36 (12 wks after switching) | TCZ IV 8 mg/kg Q4W switched to TCZ SC 162 mg Q2W (TCZ IV/SC) | 160 | 2.6, 8.7, 85.0%, 66.9%, 36.9%, 62.5%           |                                                                                                                      |
| Ogata 2018 (SHINOBI) (26)                                                                                                                                                               | S (TCZ QW over Q2W) | ΔDAS28-ESR; %DAS28-ESR<2.6, CDAI ≤2.8, ΔCDAI, ACR20/50/70 response  | 12                          | TCZ SC 162 mg QW                                             | 21  | -2.10; 19.0%, 4.8%, -16.0, 52.4%, 38.1%, 14.3% | difference in:<br>PE: ΔDAS28-ESR: -1.21 (CI:-2.13, -0.30, p=0.0108)<br><br>ΔCDAI: -7.26 (CI:-15.93, 1.40, p= 0.0979) |
|                                                                                                                                                                                         |                     |                                                                     |                             | TCZ SC 162 mg Q2W                                            | 20  | -0.89; 10.0%, 0.0%, -8.7, 20.0%, 15.0%, 15.0%  |                                                                                                                      |
| NI: non-inferiority; S: superiority; OLE: open-label extension; PE: primary endpoint; NR: not reported<br>* TCZ SC/SC: continued TCZ-SC<br><sup>a</sup> numbers not shown or calculated |                     |                                                                     |                             |                                                              |     |                                                |                                                                                                                      |

Table S2.4.1.6: Switch studies. Part 2: Efficacy outcomes of trials investigating add-on versus switching to IL-6R blockers.

| Study                        | Design                 | Primary / Secondary outcome                                                                                                                 | Timepoint (weeks) | Treatment arm                          | No. of patients (n) | Result                                                                                        | p / 95% CI                                                                 |
|------------------------------|------------------------|---------------------------------------------------------------------------------------------------------------------------------------------|-------------------|----------------------------------------|---------------------|-----------------------------------------------------------------------------------------------|----------------------------------------------------------------------------|
| Dougados 2013 (ACT-RAY) (27) | S (add-on over switch) | DAS28-ESR<2.6; mean ΔDAS28, DAS28 <3.2, EULAR good plus moderate responders, ACR–EULAR Boolean remission, SDAI ≤3.3, CDAI ≤2.8, Δtotal GSS, | 24                | add-on strategy: TCZ 8 mg/kg Q4W + MTX | 277                 | 40.4%; -3.43, 61.7%, 89.5%, 6.9%, 11.9%, 11.9%, 0.08, 90.6%, 65.7%, 71.5%, 45.5%, 24.5%, 5.8% | PE: DAS28-ESR<2.6: p=0.19, 95% CI: -2.41, 13.71<br><br>0.051, 0.029, 0.30, |

|                                              |                                   |                                                                                                                                                                                                                                                                                                                                                            |    |                                               |     |                                                                                                             |                                                                                                                        |
|----------------------------------------------|-----------------------------------|------------------------------------------------------------------------------------------------------------------------------------------------------------------------------------------------------------------------------------------------------------------------------------------------------------------------------------------------------------|----|-----------------------------------------------|-----|-------------------------------------------------------------------------------------------------------------|------------------------------------------------------------------------------------------------------------------------|
|                                              |                                   | %no progression in GSS ( $\leq$ SDC),<br>%no progression in GSS ( $\leq$ 0),<br>ACR20/50/70/90 response                                                                                                                                                                                                                                                    |    | switch strategy:<br>TCZ 8 mg/kg Q4W + Placebo | 276 | 34.8%; -3.21, 51.4%,<br>86.2%, 5.4%, 9.8%,<br>7.6%, 0.22, 87.3%,<br>59.1%; 70.3%, 40.2%,<br>25.4%, 5.1%     | 0.53, 0.56, 0.12,<br>0.26, 0.18, 0.088,<br>0.87, 0.30, 0.68,<br>0.84                                                   |
| Dougados 2014<br>(ACT-RAY, 1-year)<br>(28) * | NS<br>(1-year data of<br>ACT-RAY) | DAS28-ESR<2.6, mean $\Delta$ DAS28,<br>DAS28 <3.2, EULAR good plus<br>moderate responders, ACR-<br>EULAR Boolean remission, SDAI<br>$\leq$ 3.3, CDAI $\leq$ 2.8, $\Delta$ HQAQ, $\Delta$ total<br>GSS, %no progression in GSS<br>(SDC $\leq$ 1.5), ACR20/50/70/90<br>response                                                                              | 52 | add-on strategy:<br>TCZ 8 mg/kg Q4W + MTX     | 277 | 45.5%, -3.74, 62.5%,<br>84.5%, 17.7%, 24.2%,<br>22.7%, -0.59, 0.35,<br>92.8%, 70.8%, 50.2%,<br>31.4%, 12.6% | PE: DAS28-<br>ESR<2.6: 0.03; 0.39,<br>0.12, 0.12, 0.09,<br>0.10, 0.06, 0.14,<br>0.36, 0.016, 0.62,<br>0.22, 0.99, 0.65 |
|                                              |                                   |                                                                                                                                                                                                                                                                                                                                                            |    | switch strategy:<br>TCZ 8 mg/kg Q4W + Placebo | 276 | 36.6%, -3.67, 57.2%,<br>78.2%, 12.3%, 18.1%,<br>15.9%, -0.67, 0.63,<br>86.1%, 69.2%, 55.4%,<br>31.2%, 11.2% |                                                                                                                        |
| Kaneko 2016<br>(SURPRISE) (29)               | NI<br>(margin: 10%)               | DAS28-ESR<2.6; $\Delta$ DAS28, SDAI<br>$\leq$ 3.3, CDAI $\leq$ 2.8, EULAR<br>good/moderate responders,<br>ACR-EULAR Boolean remission,<br>$\Delta$ HQAQ, % $\Delta$ mTSS $\leq$ 0.5 <sup>a</sup> ,<br>ACR20/50/70 <sup>b</sup> ; clinically<br>relevant radiographic<br>progression rates (CRRP;<br>mTSS $\geq$ 3), mean $\Delta$ mTSS in<br>CRRP patients | 24 | add-on strategy:<br>TCZ 8 mg/kg Q4W + MTX     | 115 | 69.6%; -2.9, 44.1%,<br>39.6%, 96.5%, 20.9%,<br>-0.4, % $\Delta$ mTSS NR,<br>74.8%, 54.8%, 33.0%;<br>NR, NR  | PE: DAS28-<br>ESR<2.6: p=0.03;<br>0.41, 0.07, 0.13,<br>0.06, 0.87, 0.75                                                |
|                                              |                                   |                                                                                                                                                                                                                                                                                                                                                            |    | switch strategy:<br>TCZ 8 mg/kg Q4W           | 111 | 55.0%; -2.7, 29.6%,<br>27.8%, 90.1%, 19.8%,<br>-0.4, % $\Delta$ mTSS NR,<br>69.4%, 54.1%, 34.2%;<br>NR, NR  |                                                                                                                        |
|                                              |                                   |                                                                                                                                                                                                                                                                                                                                                            | 52 | add-on strategy:<br>TCZ 8 mg/kg Q4W + MTX     | 115 | 72.2%, -3.0, 52.2%,<br>47.8%, 94.8%, 37.1%,<br>-0.4, 66%, 73.9%,                                            | 0.77, 0.79, 0.43,<br>0.60, 0.10, 0.78,                                                                                 |

|                                                                                                                                                                                                                                                                                                                                                                                                                                                                                                                                 |  |  |  |                                     |     |                                                                                                |                        |
|---------------------------------------------------------------------------------------------------------------------------------------------------------------------------------------------------------------------------------------------------------------------------------------------------------------------------------------------------------------------------------------------------------------------------------------------------------------------------------------------------------------------------------|--|--|--|-------------------------------------|-----|------------------------------------------------------------------------------------------------|------------------------|
|                                                                                                                                                                                                                                                                                                                                                                                                                                                                                                                                 |  |  |  |                                     |     | 62.6%, 47.0%; 7% (7/95), 5.0/year                                                              | 0.50, 0.92; 0.07, 0.04 |
|                                                                                                                                                                                                                                                                                                                                                                                                                                                                                                                                 |  |  |  | switch strategy:<br>TCZ 8 mg/kg Q4W | 111 | 70.3%; -3.0, 46.8%, 44.1%, 88.3%, 35.1%, -0.5, 64%, 77.5%, 63.1%, 44.1%; 15% (15/98), 9.0/year |                        |
| <p>SDAI: Simplified Disease Activity Index; SDC: smallest detectable change; NS: not specified; NR: not reported; CRRP: clinically relevant radiographic progression rates</p> <p>* open-label csDMARDs other than MTX were added at week 24 or later (week 36) in patients with DAS28 &gt;3.2</p> <p><sup>a</sup> radiological outcomes (mTSS) reported at week 52</p> <p><sup>b</sup> ACR20/50/70 response rates at week 24/52 between both treatment arms not statistically significant (5% significance level was used)</p> |  |  |  |                                     |     |                                                                                                |                        |

Table S2.4.1.7: Switch studies. Part 3: Efficacy outcomes of trials investigating switching to another IL-6R blocker.

| Study                         | Treatment*                   | No. of patients (n) | Timepoint (weeks) | ACR20 (%) | ACR50 (%) | ACR70 (%) | DAS28 <2.6 (%) | CDAI ≤2.8 (%) | ACR/EULAR Boolean rem. (%) | ΔHAQ (mean) | ΔmTSS (mean) |
|-------------------------------|------------------------------|---------------------|-------------------|-----------|-----------|-----------|----------------|---------------|----------------------------|-------------|--------------|
| Emery 2020 (EXTEND, OLE) (30) | SAR 150 mg SC Q2W + csDMARDs | 37                  | 96                |           |           |           | 76.9           | 80.0          |                            |             |              |
|                               | SAR 200 mg SC Q2W + csDMARDs | 38                  |                   |           |           |           | 56.3           | 33.3          |                            |             |              |

|                                                                                                                                                     |                                                                         |    |  |  |  |  |      |      |  |  |  |
|-----------------------------------------------------------------------------------------------------------------------------------------------------|-------------------------------------------------------------------------|----|--|--|--|--|------|------|--|--|--|
|                                                                                                                                                     | TCZ 4 mg/kg IV Q4W (no change in dose) + csDMARDs                       | 35 |  |  |  |  | 80.0 | 55.6 |  |  |  |
|                                                                                                                                                     | TCZ 4→8 mg/kg IV Q4W + csDMARDs at wk 4, then continuing 8 mg/kg IV Q4W | 38 |  |  |  |  | 72.7 | 50.0 |  |  |  |
|                                                                                                                                                     | All TCZ (including pat. changing dose after wk 4 of the RCT)            | 93 |  |  |  |  | 79.3 | 58.8 |  |  |  |
| EXTEND: all patients received open-label sarilumab 200 mg SC Q2W<br>* treatment during the RCT, before switch to sarilumab 200 mg SC Q2W in the OLE |                                                                         |    |  |  |  |  |      |      |  |  |  |

Table S2.4.1.8: Induction/Strategic studies. Part 1: Efficacy outcomes of trials comparing the effectiveness of IL-6R blocker monotherapy and combination therapy with MTX in early RA.

| Study                          | Treatment                 | No. of patients (n) | Timepoint (weeks)                 | ACR20 (%)         | ACR50 (%)         | ACR70 (%)         | DAS28 <2.6 (%)    | CDAI ≤2.8 (%) | ACR/EULAR Boolean rem. (%) | ΔHAQ (mean) | ΔmTSS (mean)      |
|--------------------------------|---------------------------|---------------------|-----------------------------------|-------------------|-------------------|-------------------|-------------------|---------------|----------------------------|-------------|-------------------|
| Burmester 2016 (FUNCTION) (31) | Placebo + MTX             | 287                 | 24                                | 65.2              | 43.2              | 25.4              | 15                |               |                            | -0.71       | 1.14 <sup>b</sup> |
|                                | TCZ 4 mg/kg Q4W + MTX     | 288                 |                                   | 73.6              | 47.9              | 34.7              | 31.9              |               |                            | -0.92       | 0.42 <sup>b</sup> |
|                                | TCZ 8 mg/kg Q4W + MTX     | 290                 |                                   | 74.5              | 56.9              | 38.6              | 44.8              |               |                            | -0.91       | 0.08 <sup>b</sup> |
|                                | TCZ 8 mg/kg Q4W + Placebo | 292                 |                                   | 70.2              | 47.6              | 30.1              | 38.7              |               |                            | -0.82       | 0.26 <sup>b</sup> |
| Burmester 2017                 | Placebo + MTX pre-escape  | 142                 | 52 <sup>b</sup> /104 <sup>c</sup> | 43.0 <sup>c</sup> | 30.3 <sup>c</sup> | 16.2 <sup>c</sup> | 51.4 <sup>c</sup> |               |                            |             |                   |



|                                                                                                                                                                                                                                                                                                                                                                                                                                                             |                                     |     |                                      |                                      |                                      |                                      |                                           |                                      |                                      |  |                                      |
|-------------------------------------------------------------------------------------------------------------------------------------------------------------------------------------------------------------------------------------------------------------------------------------------------------------------------------------------------------------------------------------------------------------------------------------------------------------|-------------------------------------|-----|--------------------------------------|--------------------------------------|--------------------------------------|--------------------------------------|-------------------------------------------|--------------------------------------|--------------------------------------|--|--------------------------------------|
| (FUNCTION, 2-<br>years) (32) <sup>a</sup>                                                                                                                                                                                                                                                                                                                                                                                                                   | TCZ 4 mg/kg Q4W +<br>MTX pre-escape | 95  |                                      | 29.5 <sup>c</sup>                    | 16.8 <sup>c</sup>                    | 6.3 <sup>c</sup>                     | 30.5 <sup>c</sup>                         |                                      |                                      |  |                                      |
|                                                                                                                                                                                                                                                                                                                                                                                                                                                             | Placebo + MTX                       | 287 |                                      | 58.5 <sup>b</sup> /25.4 <sup>c</sup> | 41.5 <sup>b</sup> /22.0 <sup>c</sup> | 29.3 <sup>b</sup> /17.4 <sup>c</sup> | 20.2 <sup>b</sup> /16.0 <sup>c</sup>      | 19.5 <sup>b</sup> /20.2 <sup>c</sup> | 12.2 <sup>b</sup> /10.1 <sup>c</sup> |  | 1.88 <sup>d</sup>                    |
|                                                                                                                                                                                                                                                                                                                                                                                                                                                             | TCZ 4 mg/kg Q4W +<br>MTX            | 288 |                                      | 65.3 <sup>b</sup> /39.6 <sup>c</sup> | 54.9 <sup>b</sup> /36.5 <sup>c</sup> | 37.8 <sup>b</sup> /31.6 <sup>c</sup> | 36.1 <sup>b</sup> /28.1 <sup>c</sup>      | 25.3 <sup>b</sup> /27.8 <sup>c</sup> | 17.0 <sup>b</sup> /17.0 <sup>c</sup> |  | 1.43 <sup>d</sup>                    |
|                                                                                                                                                                                                                                                                                                                                                                                                                                                             | TCZ 8 mg/kg Q4W +<br>MTX            | 290 |                                      | 67.9 <sup>b</sup> /65.2 <sup>c</sup> | 56.2 <sup>b</sup> /57.6 <sup>c</sup> | 43.4 <sup>b</sup> /46.6 <sup>c</sup> | 49.3 <sup>b</sup> /47.6 <sup>c</sup>      | 32.1 <sup>b</sup> /37.9 <sup>c</sup> | 20.7 <sup>b</sup> /23.1 <sup>c</sup> |  | 0.19 <sup>d</sup>                    |
|                                                                                                                                                                                                                                                                                                                                                                                                                                                             | TCZ 8 mg/kg Q4W +<br>Placebo        | 292 |                                      | 65.4 <sup>b</sup> /61.6 <sup>c</sup> | 50.7 <sup>b</sup> /53.1 <sup>c</sup> | 37.0 <sup>b</sup> /39.4 <sup>c</sup> | 40.4 <sup>b</sup> /43.5 <sup>c</sup>      | 24.0 <sup>b</sup> /32.5 <sup>c</sup> | 15.1 <sup>b</sup> /19.2 <sup>c</sup> |  | 0.62 <sup>d</sup>                    |
| Bijlsma 2016<br>(U-ACT-EARLY)<br>(33) <sup>e</sup>                                                                                                                                                                                                                                                                                                                                                                                                          | Placebo + MTX                       | 108 | 24/52 <sup>b</sup> /104 <sup>c</sup> | 59/69 <sup>b</sup> /61 <sup>c</sup>  | 34/51 <sup>b</sup> /48 <sup>c</sup>  | 15/33 <sup>b</sup> /35 <sup>c</sup>  | 39.6/61.2 <sup>b</sup> /58.6 <sup>c</sup> | 13/36 <sup>b</sup> /37 <sup>c</sup>  |                                      |  | 0.96 <sup>b</sup> /1.53 <sup>c</sup> |
|                                                                                                                                                                                                                                                                                                                                                                                                                                                             | TCZ 8 mg/kg Q4W +<br>MTX            | 106 |                                      | 75/75 <sup>b</sup> /63 <sup>c</sup>  | 64/62 <sup>b</sup> /49 <sup>c</sup>  | 44/44 <sup>b</sup> /36 <sup>c</sup>  | 80.0/71.0 <sup>b</sup> /63.5 <sup>c</sup> | 30/42 <sup>b</sup> /47 <sup>c</sup>  |                                      |  | 0.50 <sup>b</sup> /1.18 <sup>c</sup> |
|                                                                                                                                                                                                                                                                                                                                                                                                                                                             | TCZ 8 mg/kg Q4W +<br>Placebo        | 103 |                                      | 75/72 <sup>b</sup> /65 <sup>c</sup>  | 59/59 <sup>b</sup> /55 <sup>c</sup>  | 37/44 <sup>b</sup> /39 <sup>c</sup>  | 75.5/80.8 <sup>b</sup> /70.5 <sup>c</sup> | 27/35 <sup>b</sup> /40 <sup>c</sup>  |                                      |  | 0.79 <sup>b</sup> /1.45 <sup>c</sup> |
| <sup>a</sup> patients not receiving 8 mg/kg TCZ and not achieving DAS28-ESR ≤3.2 at week 52 switched to escape therapy (8 mg/kg TCZ+MTX)<br><sup>b</sup> efficacy outcome at week 52<br><sup>c</sup> efficacy outcome at week 104<br><sup>d</sup> mean change from baseline to week 104<br><sup>e</sup> outcome definition: remission according DAS28 remission criteria and swollen joint count ≤ 4 joints; CDAI remission rate based on post-hoc analysis |                                     |     |                                      |                                      |                                      |                                      |                                           |                                      |                                      |  |                                      |

Table S2.4.1.9: Induction/Strategic studies. Part 2: Efficacy outcomes of trials comparing the effectiveness of IL-6R blocker + MTX with conventional treatment in early RA.

| Study                                                                                                    | Treatment                                  | No. of patients (n) | Timepoint (weeks) | ACR20 (%) | ACR50 (%) | ACR70 (%) | DAS28 <2.6 (%)    | CDAI ≤2.8 (%) | ACR/EULAR Boolean rem. (%) | ΔHAQ (mean) | ΔmTSS (mean) |
|----------------------------------------------------------------------------------------------------------|--------------------------------------------|---------------------|-------------------|-----------|-----------|-----------|-------------------|---------------|----------------------------|-------------|--------------|
| Hetland 2020 (NORD-STAR) (34)                                                                            | MTX + active conventional treatment        | 200                 | 24                |           |           |           | reference         | 48.2          | reference                  |             |              |
|                                                                                                          | CZP 200 mg Q2W + MTX                       | 203                 |                   |           |           |           | 2.6 <sup>a</sup>  | 52.6          | 3.6 <sup>a</sup>           |             |              |
|                                                                                                          | ABA 125 mg QW + MTX                        | 204                 |                   |           |           |           | 4.5 <sup>a</sup>  | 56.3          | 4.6 <sup>a</sup>           |             |              |
|                                                                                                          | TCZ IV 8 mg/kg Q4W (or SC 162 mg QW) + MTX | 188                 |                   |           |           |           | -0.7 <sup>a</sup> | 48.7          | -3.8 <sup>a</sup>          |             |              |
| <sup>a</sup> numbers are percentage differences in rates with active conventional treatment as reference |                                            |                     |                   |           |           |           |                   |               |                            |             |              |

Table S2.4.1.10: Tapering studies. Part 1: Efficacy outcomes of trials investigating tapering of csDMARDs while on IL-6R blocker therapy.

| Study                         | Design           | Primary / Secondary outcome | Timepoint (weeks) | Treatment arm                            | No. of patients (n) | Result       | p / 95% CI               |
|-------------------------------|------------------|-----------------------------|-------------------|------------------------------------------|---------------------|--------------|--------------------------|
| Edwards 2018 (ACT-TAPER) (35) | NI (margin: 10%) |                             | 60                | TCZ 8 mg/kg Q4W + Placebo (tapering MTX) | 136                 | 76.5%; 51.5% | PE: Maintenance of EULAR |

|                                           |                      |                                                                                                                                                                                                                                            |    |                                                |     |                                                                            |                                                                                                                                                                                                                                                                                                 |
|-------------------------------------------|----------------------|--------------------------------------------------------------------------------------------------------------------------------------------------------------------------------------------------------------------------------------------|----|------------------------------------------------|-----|----------------------------------------------------------------------------|-------------------------------------------------------------------------------------------------------------------------------------------------------------------------------------------------------------------------------------------------------------------------------------------------|
|                                           |                      | Maintenance of EULAR good/moderate response from week 24 to 60; DAS28<2.6                                                                                                                                                                  |    | TCZ 8 mg/kg Q4W + MTX (stable MTX)             | 136 | 65.4%; 47.1%                                                               | good/moderate response from week 24 to 60: 0.036; 0.342                                                                                                                                                                                                                                         |
| Kremer 2018 (COMP-ACT) (36)               | NI (margin: 0.6)     | $\Delta$ DAS28-ESR week 24 to 40; DAS28<2.6, DAS28 $\leq$ 3.2, ACR 20/50/70                                                                                                                                                                | 40 | TCZ 162 mg QW/Q2W + Placebo                    | 147 | 0.46; 49.7%, 63.3%, 69%, 50%, 34%                                          | PE: $\Delta$ DAS28-ESR week 24 to 40: 0.318 (CI: 0.045, 0.592)                                                                                                                                                                                                                                  |
|                                           |                      |                                                                                                                                                                                                                                            |    | TCZ 162 mg QW/Q2W + MTX                        | 147 | 0.14; 59.2%, 76.9%, 79%, 64%, 42%                                          |                                                                                                                                                                                                                                                                                                 |
| Pablos 2019 (JUST-ACT) (37)               | NI (margin: 0.6)     | $\Delta$ DAS28-ESR week 16 to 28, DAS28<2.6, CDAI<2.6, SDAI<3.3, $\Delta$ HQAQ                                                                                                                                                             | 28 | TCZ 8 mg/kg Q4W + Placebo (switch to TCZ mono) | 82  | 0.073; 75.9%, 35.8%, 28.2%, 0.02                                           | PE: $\Delta$ DAS28-ESR week 16 to 28: -0.06 (CI: -0.40, 0.27)<br>0.328, 0.518, 0.358, 0.674                                                                                                                                                                                                     |
|                                           |                      |                                                                                                                                                                                                                                            |    | TCZ 8 mg/kg Q4W + MTX                          | 82  | 0.007; 82.3%, 40.7%, 35.1%, 0.06                                           |                                                                                                                                                                                                                                                                                                 |
| Peterfy 2020 (COMP-ACT MRI Substudy) (38) | Substudy of COMP-ACT | Mean $\Delta$ MRI-assessed synovitis, osteitis, erosion, and cartilage loss from week 24 to 40 (each outcome: both hands/dominant hand); %pat not progressing more than SDC in dominant hand and wrist at Week 40 for each outcome measure | 40 | TCZ 162 mg QW/Q2W + Placebo                    | 38  | -0.18/-0.11, 0.37/0.69, 0.18/0.49, -0.03/-0.05; 97%, 87.9%, 84.8%, 93.9%   | Difference (95%CI): 0.06 (CI:-0.30, 0.41)/0.11 (CI:-0.18, 0.40), 0.53 (CI:-0.30, 1.36)/1.07 (CI:-0.18, 2.33), 0.24 (CI:-0.21, 0.68)/0.43 (CI:-0.14,1.01), -0.23 (CI:-0.58, 0.11)/-0.16 (CI:-0.59,0.27); -3.0 (CI: -8.9, 2.8), -4.4 (CI:-18.4, 9.5), -12.6 (CI:-25.8, 0.6), -3.5 (CI:-13.0, 6.0) |
|                                           |                      |                                                                                                                                                                                                                                            |    | TCZ 162 mg QW/Q2W + MTX                        | 41  | -0.24/-0.22, -0.16/-0.39, -0.06/0.06, 0.20/0.11; 100%, 92.3%, 97.4%, 97.4% |                                                                                                                                                                                                                                                                                                 |

Table S2.4.1.11: Tapering studies. Part 2: Efficacy outcomes of trials investigating tapering of glucocorticoids while on IL-6R blocker therapy.

| Study                        | Design          | Primary / Secondary outcome                                                                        | Timepoint (weeks) | Treatment arm                                                               | No. of patients (n) | Result                         | p / 95% CI                                                                                                       |
|------------------------------|-----------------|----------------------------------------------------------------------------------------------------|-------------------|-----------------------------------------------------------------------------|---------------------|--------------------------------|------------------------------------------------------------------------------------------------------------------|
| Burmester 2020 (SEMIRA) (39) | S (margin: 0.6) | ΔDAS28-ESR; DAS28-ESR ≤3.2 + no flare + no confirmed adrenal insufficiency; ΔCDAI, %no flare, ΔHAQ | 24                | TCZ IV 8 mg/kg Q4W or SC 162 mg QW ± csDMARDs + Glucocorticoid tapering     | 131                 | 0.538; 65%, 2.663, 74%, 0.17   | PE: ΔDAS28-ESR: p<0.0001; relative risk 0.83 (CI:0.71 to 0.97); CI: 0.661 to 4.023, flare not assessed, p<0.0001 |
|                              |                 |                                                                                                    |                   | TCZ IV 8 mg/kg Q4W or SC 162 mg QW ± csDMARDs + Glucocorticoid continuation | 128                 | -0.075; 77%, 0.321, 89%, -0.09 |                                                                                                                  |

Table S2.4.1.12: Tapering studies. Part 3: Efficacy outcomes of trials investigating tapering of IL-6R blockers.

| Study                                       | Design                                            | Primary / Secondary outcome                                                                                                                                                                                                                                                                                         | Timepoint (weeks) | Treatment arm                                                                   | No. of patients (n) | Result                                                                                         | p / 95% CI                                                                                                                                                                                                           |
|---------------------------------------------|---------------------------------------------------|---------------------------------------------------------------------------------------------------------------------------------------------------------------------------------------------------------------------------------------------------------------------------------------------------------------------|-------------------|---------------------------------------------------------------------------------|---------------------|------------------------------------------------------------------------------------------------|----------------------------------------------------------------------------------------------------------------------------------------------------------------------------------------------------------------------|
| Huizinga 2015 (ACT-RAY, 2 and 3-years) (40) | NS                                                | DAS28-ESR<2.6; mean ΔDAS28, EULAR good/moderate responders, ACR–EULAR Boolean remission, SDAI ≤3.3, CDAI ≤2.8, ΔHAQ, Δtotal GSS, %no progression in GSS (≤2.1), %TCZ-free remission, median time to TCZ-free rem., %total drug-free remission, %flare after TCZ-free rem., median time to flare after TCZ-free rem. | 104               | add-on strategy arm: TCZ 8 mg/kg Q4W + MTX                                      | 277                 | 38.3%; -3.60, 75.8%, 14.8%, 22.0%, 22.7%, -0.67, 0.35, 94.4%, 53.1%, 645 d, 8.6%, 82.5%, 113 d | DAS28-ESR<2.6: 0.452; 0.934, 0.056, 0.048, 0.627, 0.203, 0.833, 0.034, 0.098, 0.170, p-values for time to TCZ-free rem not reported, 0.010, CI: 0.815, 0.973, p-values for time to flare after TCZ-rem. not reported |
|                                             |                                                   |                                                                                                                                                                                                                                                                                                                     |                   | switch strategy arm: TCZ 8 mg/kg Q4W + Placebo                                  | 276                 | 35.1%; -3.61, 66.7%, 9.4%, 19.9%, 18.1%, -0.69, 0.95, 91.1%, 47.6%, 786 d, 3.1%, 88.5%, 84 d   |                                                                                                                                                                                                                      |
| Kaneko 2018 (SURPRISE, 2-years) (41)        | NS                                                | TCZ free rate, TCZ free DAS28-ESR<2.6, TCZ-free DAS28≤3.2, HAQ, ΔmTSS                                                                                                                                                                                                                                               | 104               | add-on arm (TCZ+MTX: discontinuing TCZ → MTX mono)                              | 49                  | 67.3%, 24.4%; 55.1%, 0.30, 0.37                                                                | TCZ free rate: 0.001, 0.29, 0.005, 0.29, 0.36                                                                                                                                                                        |
|                                             |                                                   |                                                                                                                                                                                                                                                                                                                     |                   | switch arm (TCZ mono): discontinuing TCZ → no DMARD                             | 53                  | 28.5%, 14.3%; 26.6%, 0.17, 0.64                                                                |                                                                                                                                                                                                                      |
| Kedra 2019 (TOLEDO) (42)                    | NI (margin: 0.25 for DAS44; 0.07 for flare rates) | DAS-44; flare (DAS28 > 3.2), major flare (DAS28 >3.2+ no recovery at following visit despite previous bDMARD escalation)                                                                                                                                                                                            | 104               | TCZ (or ABA) maintenance at full dose                                           | 116                 | DAS-44 slope difference for TCZ subgroup: 0.02 (95% CI: -0.22, 0.26)                           | DAS-44: NI: 0.22, p=0.03                                                                                                                                                                                             |
|                                             |                                                   |                                                                                                                                                                                                                                                                                                                     |                   | progressive injection interval increase (by stage) up to bDMARD discontinuation | 117                 | flare:                                                                                         |                                                                                                                                                                                                                      |

|         |  |  |  |  |  |                                                                          |  |
|---------|--|--|--|--|--|--------------------------------------------------------------------------|--|
|         |  |  |  |  |  | +0.42 (95% CI: 0.27, 0.57)<br>major flare: +0.07<br>(95%CI: -0.03, 0.16) |  |
| d: days |  |  |  |  |  |                                                                          |  |

## 2.4.2: Systemic juvenile idiopathic arthritis (sJIA)

Table S2.4.2.1: Efficacy outcomes of trials investigating IL-6R/L blockers in sJIA.

| Study                                                                                                                           | Treatment                                        | No. of patients (n)                           | Timepoint (weeks)                 | JIA ACR 30 + no fever (%) | JIA ACR30 (%) | JIA ACR50 (%) | JIA ACR70 (%) | JIA ACR90 (%) | Fever/Rash (%) | Mean ESR (mm/h) | CFB in CHAQ score (%) | ΔaSH*                                | ΔPoznanski score*                    |
|---------------------------------------------------------------------------------------------------------------------------------|--------------------------------------------------|-----------------------------------------------|-----------------------------------|---------------------------|---------------|---------------|---------------|---------------|----------------|-----------------|-----------------------|--------------------------------------|--------------------------------------|
| De Benedetti 2012 (TENDER) (43)                                                                                                 | Placebo                                          | 37                                            | 12                                | 24                        | 24.3          | 10.8          | 8.1           | 5.4           | 79/89          | 59.8            | -10.3                 |                                      |                                      |
|                                                                                                                                 | TCZ IV 8mg/kg (if ≥30 kg) or 12mg/kg (<30kg) Q2W | 75                                            |                                   | 85                        | 90.7          | 85.3          | 70.7          | 37.3          | 15/36          | 4.4             | -45.6                 |                                      |                                      |
| Malattia 2020 (44)                                                                                                              | TCZ (TENDER trial)                               | aSH: n=45 <sup>a</sup> /37 <sup>b</sup>       | 52 <sup>a</sup> /104 <sup>b</sup> |                           |               |               |               |               |                |                 |                       | 0.00 <sup>a</sup> /0.50 <sup>b</sup> |                                      |
|                                                                                                                                 |                                                  | Poznanski: n=32 <sup>a</sup> /26 <sup>b</sup> |                                   |                           |               |               |               |               |                |                 |                       |                                      | 0.29 <sup>a</sup> /0.16 <sup>b</sup> |
| CFB: change from baseline<br>* values reported as median, change from baseline<br><sup>a</sup> week 52<br><sup>b</sup> week 104 |                                                  |                                               |                                   |                           |               |               |               |               |                |                 |                       |                                      |                                      |

## 2.4.3: Polyarticular-course juvenile idiopathic arthritis (pcJIA)

Table S2.4.3.1: Efficacy outcomes of trials investigating IL-6R/L blockers in pcJIA.

| Study                                             | Treatment           | No. of patients (n)                           | Timepoint (weeks)                              | JIA-ACR30 flare (%) | JIA ACR30 (%) | JIA ACR50 (%) | JIA ACR70 (%) | JIA ACR90 (%) | ΔESR (mm/h) | ΔCHAQ | ΔaSH*                                 | ΔPoznanski score* |
|---------------------------------------------------|---------------------|-----------------------------------------------|------------------------------------------------|---------------------|---------------|---------------|---------------|---------------|-------------|-------|---------------------------------------|-------------------|
| Brunner 2015 (CHERISH) (45)                       | all Placebo         | 81                                            | 40 (16 wks open label TCZ + 24 wks withdrawal) | 48.1                | 54.3          | 51.9          | 42.0          | 23.5          | -12.0       | -0.6  |                                       |                   |
|                                                   | all TCZ             | 82                                            |                                                | 25.6                | 74.4          | 73.2          | 64.6          | 45.1          | -26.3       | -0.8  |                                       |                   |
| Malattia 2020 (44)                                | TCZ (CHERISH trial) | aSH: n=40 <sup>a</sup> /35 <sup>b</sup>       | 52 <sup>a</sup> /104 <sup>b</sup>              |                     |               |               |               |               |             |       | 0.50 <sup>a</sup> /-1.00 <sup>b</sup> |                   |
|                                                   |                     | Poznanski: n=31 <sup>a</sup> /25 <sup>b</sup> |                                                |                     |               |               |               |               |             |       | 0.26 <sup>a</sup> /0.55 <sup>b</sup>  |                   |
| * values reported as median, change from baseline |                     |                                               |                                                |                     |               |               |               |               |             |       |                                       |                   |
| <sup>a</sup> week 52                              |                     |                                               |                                                |                     |               |               |               |               |             |       |                                       |                   |
| <sup>b</sup> week 104                             |                     |                                               |                                                |                     |               |               |               |               |             |       |                                       |                   |



## 2.4.4: Adult-onset Still's disease (AoSD)

Table S2.4.4.1: Efficacy outcomes of trials investigating IL-6R/L blockers in AoSD.

| Study                                                                                                                                                                                                                                                         | Treatment      | No. of patients (n) | Timepoint (weeks)               | ACR20 (%)                            | ACR50 (%)                            | ACR70 (%)                            | Fever (%)                           | Rash (%)                             | ΔHAQ | ΔSFS                                 | ΔCRP (mg/dl) | Decrease in GC dose (%) |
|---------------------------------------------------------------------------------------------------------------------------------------------------------------------------------------------------------------------------------------------------------------|----------------|---------------------|---------------------------------|--------------------------------------|--------------------------------------|--------------------------------------|-------------------------------------|--------------------------------------|------|--------------------------------------|--------------|-------------------------|
| Kaneko 2018 (46)*                                                                                                                                                                                                                                             | Placebo        | 13                  | 4 <sup>a</sup> /12 <sup>b</sup> | 38.5 <sup>a</sup> /30.8 <sup>b</sup> | 30.8 <sup>a</sup> /30.8 <sup>b</sup> | 30.8 <sup>a</sup> /30.8 <sup>b</sup> | 7.7 <sup>a</sup> /15.4 <sup>b</sup> | 38.5 <sup>a</sup> /38.5 <sup>b</sup> |      | -2.7 <sup>a</sup> /-2.3 <sup>b</sup> |              | 21.0 <sup>b</sup>       |
|                                                                                                                                                                                                                                                               | TCZ 8mg/kg Q2W | 13                  |                                 | 76.9 <sup>a</sup> /61.5 <sup>b</sup> | 61.5 <sup>a</sup> /61.5 <sup>b</sup> | 38.5 <sup>a</sup> /46.2 <sup>b</sup> | 0.0 <sup>a</sup> /0.0 <sup>b</sup>  | 15.4 <sup>a</sup> /15.4 <sup>b</sup> |      | -4.1 <sup>a</sup> /-4.1 <sup>b</sup> |              | 46.2 <sup>b</sup>       |
| <p>* two coprimary endpoints of double-blind phase (part 1,2):<br/> part 1<sup>a</sup>: proportion of patients who achieved ACR 50% improvement at 4 weeks.<br/> part 2<sup>b</sup>: proportion of patients who achieved ACR 50% improvement at 12 weeks.</p> |                |                     |                                 |                                      |                                      |                                      |                                     |                                      |      |                                      |              |                         |

## 2.4.5: Giant cell arteritis (GCA)

Table S2.4.5.1: Efficacy outcomes of trials investigating IL-6R/L blockers in GCA.

| Study                             | Primary / Secondary outcome                                                                                                                                                                                                                                                               | Timepoint (weeks) | Treatment arm                      | No. of patients (n) | Result                | p / 95% CI                                                                                                                                                                                                          |
|-----------------------------------|-------------------------------------------------------------------------------------------------------------------------------------------------------------------------------------------------------------------------------------------------------------------------------------------|-------------------|------------------------------------|---------------------|-----------------------|---------------------------------------------------------------------------------------------------------------------------------------------------------------------------------------------------------------------|
| Stone 2017 (GiACTA) (47)          | % of sustained GC-free remission at week 52 versus placebo + GC-26-wk taper (primary endpoint); % of sustained GC-free remission at week 52 vs placebo + GC-52-wk taper (key secondary outcome); cumulative GC dose (mg), first flare incidence after remission, Δquality of life (SF-36) | 52                | Placebo + GC-26-Wk Taper           | 50                  | 14%; 3296, 68%, -0.28 | PE: p<0.001 for the comparison of each TCZ group with PBO<br>SE: p<0.001;<br>GC-dose: 0.001 (for both comparisons), flare: HR 0.23 (CI:0.11,0.46) 0.28 (CI:0.12,0.66) p<0.001, SF-36: 0.002 (TCZ QW vs 52-wk taper) |
|                                   |                                                                                                                                                                                                                                                                                           |                   | Placebo + GC-52-Wk Taper           | 51                  | 18%; 3818, 49%, -1.49 |                                                                                                                                                                                                                     |
|                                   |                                                                                                                                                                                                                                                                                           |                   | TCZ 162 mg SC QW + GC-26-Wk taper  | 100                 | 56%; 1862, 23%, 4.10  |                                                                                                                                                                                                                     |
|                                   |                                                                                                                                                                                                                                                                                           |                   | TCZ 162 mg SC Q2W + GC-26-Wk taper | 50                  | 53%; 1862, 26%, 2.76  |                                                                                                                                                                                                                     |
| Stone 2019 (3-year analysis) (48) | Median time to first flare (days), %flare during entire 3-year study period                                                                                                                                                                                                               | 156               | Pooled Placebo (new onset)         | 46                  | 179; 72%              | PBO new onset CI:149-331; PBO relapsing CI:148-322; TCZ QW new onset CI:499-NE; TCZ QW relapsing CI:463-NE; TCZ Q2W new onset CI:341-778; TCZ Q2W relapsing CI:162-645                                              |
|                                   |                                                                                                                                                                                                                                                                                           |                   | Pooled Placebo (relapsing)         | 55                  | 224; 69%              |                                                                                                                                                                                                                     |
|                                   |                                                                                                                                                                                                                                                                                           |                   | TCZ QW (new onset)                 | 47                  | 577; 51%              |                                                                                                                                                                                                                     |
|                                   |                                                                                                                                                                                                                                                                                           |                   | TCZ QW (relapsing)                 | 53                  | 575; 53%              |                                                                                                                                                                                                                     |
|                                   |                                                                                                                                                                                                                                                                                           |                   | TCZ Q2W (new onset)                | 26                  | 479; 73%              |                                                                                                                                                                                                                     |
|                                   |                                                                                                                                                                                                                                                                                           |                   | TCZ Q2W (relapsing)                | 23                  | 428; 65%              |                                                                                                                                                                                                                     |

|                                                                                                                                                                                                                                                                                                                                      |                                                             |                                                    |                                   |                 |                                                                                                                                                                                           |                                                                     |
|--------------------------------------------------------------------------------------------------------------------------------------------------------------------------------------------------------------------------------------------------------------------------------------------------------------------------------------|-------------------------------------------------------------|----------------------------------------------------|-----------------------------------|-----------------|-------------------------------------------------------------------------------------------------------------------------------------------------------------------------------------------|---------------------------------------------------------------------|
| Calderón-Goercke 2019 (49)                                                                                                                                                                                                                                                                                                           | %prolonged remission, %relapse, GC-sparing effects (median) | 26 <sup>a</sup> /52 <sup>b</sup> /104 <sup>c</sup> | TCZ IV                            | 104             | 56.3% <sup>a</sup> , 61.4% <sup>b</sup> , 63.6% <sup>c</sup> ;<br>6.3% <sup>a</sup> ; 15.8% <sup>b</sup> , 21.2% <sup>c</sup> ;<br>6.9 <sup>a</sup> , 3.7 <sup>b</sup> , 2.4 <sup>c</sup> | 0.712, 0.043, 0.257;<br>0.251, 0.140, 0.180;<br>0.032, 0.085, 0.021 |
|                                                                                                                                                                                                                                                                                                                                      |                                                             |                                                    | TCZ SC                            | 30              | 65% <sup>a</sup> , 91.7% <sup>b</sup> , 85.7% <sup>c</sup> ;<br>0.0% <sup>a</sup> ; 0.0% <sup>b</sup> , 0.0% <sup>c</sup> ;<br>3.8 <sup>a</sup> , 1.7 <sup>b</sup> , 0.0 <sup>c</sup>     |                                                                     |
| Schmidt 2020 (50)<br><br>study terminated early (October 2017)                                                                                                                                                                                                                                                                       | % of sustained remission at week 52, %flare (wk 12- wk 52)  | 52                                                 | Placebo + GC-6-month Taper        | 9 <sup>d</sup>  | 0%, 88.9%,                                                                                                                                                                                | NA                                                                  |
|                                                                                                                                                                                                                                                                                                                                      |                                                             |                                                    | Placebo + GC-12-month Taper       | 7 <sup>d</sup>  | 0%, 71.4%                                                                                                                                                                                 |                                                                     |
|                                                                                                                                                                                                                                                                                                                                      |                                                             |                                                    | SRK 50 mg Q4W + GC-6-month Taper  | 9 <sup>d</sup>  | 11.1%, 55.6%                                                                                                                                                                              |                                                                     |
|                                                                                                                                                                                                                                                                                                                                      |                                                             |                                                    | SRK 100 mg Q2W + GC-3-month Taper | 13 <sup>d</sup> | 15.4%, 69.2%                                                                                                                                                                              |                                                                     |
|                                                                                                                                                                                                                                                                                                                                      |                                                             |                                                    | SRK 100 mg Q2W + GC-6-month Taper | 17 <sup>d</sup> | 17.6%, 52.9%                                                                                                                                                                              |                                                                     |
| SE: secondary endpoint; PBO: placebo; SF-36: 36- item Short Form Health Survey<br><sup>a</sup> week 26<br><sup>b</sup> week 52<br><sup>c</sup> week 104<br><sup>d</sup> patients in the revised intent-to-treat population (data presented with imputation; imputation rule: pat. withdrawing from the study early counted as flare) |                                                             |                                                    |                                   |                 |                                                                                                                                                                                           |                                                                     |

## 2.4.6: Takayasu arteritis (TAK)

Table S2.4.6.1: Efficacy outcomes of trials investigating IL-6R/L blockers in TAK.

| Study                                                                                                                                                                                                                                                                                                                                                                                                      | Treatment                | No. of patients (n) | Timepoint (weeks)      | Relapse protocol definition* (%) | Relapse Kerr's definition (%) | Relapse clinical definition (%) | Time to relapse (weeks) <sup>a</sup> | Time to relapse (weeks) <sup>b</sup> | Time to relapse (weeks) <sup>c</sup> |
|------------------------------------------------------------------------------------------------------------------------------------------------------------------------------------------------------------------------------------------------------------------------------------------------------------------------------------------------------------------------------------------------------------|--------------------------|---------------------|------------------------|----------------------------------|-------------------------------|---------------------------------|--------------------------------------|--------------------------------------|--------------------------------------|
| Nakaoka 2018 (the TAKT study) (51)                                                                                                                                                                                                                                                                                                                                                                         | Placebo + GC Taper       | 18                  | until 19 pat. relapsed | 61.1                             | 61.1                          | 61.1                            | 12.1                                 | 12.1                                 | 12.0                                 |
|                                                                                                                                                                                                                                                                                                                                                                                                            | TCZ 162 mg QW + GC taper | 18                  |                        | 44.4                             | 44.4                          | 61.1                            | NE                                   | NE                                   | 16.0                                 |
| <p>* defined as ≥2 of the following: objective systemic symptoms, subjective systemic symptoms, elevated inflammation markers, vascular signs/symptoms or ischemic symptoms<br/> NE: not evaluable<br/> <sup>a</sup> protocol definition, numbers reported as median<br/> <sup>b</sup> Kerr's definition, numbers reported as median<br/> <sup>c</sup> clinical definition, numbers reported as median</p> |                          |                     |                        |                                  |                               |                                 |                                      |                                      |                                      |

## 2.4.7: Multicentric Castleman's disease (MCD)

Table S2.4.7.1: Efficacy outcomes of trials investigating IL-6R/L blockers in MCD.

| Study                                                                                                                                                                                                                                                                                                                                                                                                                                                                                                                                                                                                                                                                                                                                                                                 | Treatment             | No. of patients (n) | Timepoint (weeks)                     | Durable tumor + symptomatic response (%) <sup>a</sup> | Tumor response (%) <sup>b</sup> | Tumor response (%) <sup>c</sup> | Duration of durable tumor + symptomatic response (days) <sup>d</sup> | Time to durable symptomatic response (days) <sup>e</sup> | Time to treatment failure (days) <sup>d</sup> | Hb $\geq$ 15g/L (%) <sup>f</sup> | 1-year survival (%) |
|---------------------------------------------------------------------------------------------------------------------------------------------------------------------------------------------------------------------------------------------------------------------------------------------------------------------------------------------------------------------------------------------------------------------------------------------------------------------------------------------------------------------------------------------------------------------------------------------------------------------------------------------------------------------------------------------------------------------------------------------------------------------------------------|-----------------------|---------------------|---------------------------------------|-------------------------------------------------------|---------------------------------|---------------------------------|----------------------------------------------------------------------|----------------------------------------------------------|-----------------------------------------------|----------------------------------|---------------------|
| Van Rhee 2014 (52)                                                                                                                                                                                                                                                                                                                                                                                                                                                                                                                                                                                                                                                                                                                                                                    | Placebo + BSC         | 26                  | $\geq$ 18 wks during masked treatment | 0                                                     | 4                               | 0                               | NE                                                                   | 65                                                       | 134                                           | 0                                | 92                  |
|                                                                                                                                                                                                                                                                                                                                                                                                                                                                                                                                                                                                                                                                                                                                                                                       | SIL 11mg/kg Q3W + BSC | 53                  |                                       | 34                                                    | 38                              | 51                              | 383                                                                  | 155                                                      | NE                                            | 61                               | 100                 |
| <p>NE: not evaluable</p> <p><sup>a</sup> by independent review, intention-to-treat population, defined as a complete or partial response by modified Cheson criteria with improvement or stabilization of disease-related symptoms for at least 18 weeks (= primary endpoint)</p> <p><sup>b</sup> according to independent review, response-evaluable population</p> <p><sup>c</sup> according to investigator assessment, response-evaluable population</p> <p><sup>d</sup> intention-to-treat population, numbers reported as median</p> <p><sup>e</sup> by independent review for responders (response-evaluable population), numbers reported as median</p> <p><sup>f</sup> week 13 compared with baseline (evaluable population, n=31 in SIL group vs n=11 in placebo group)</p> |                       |                     |                                       |                                                       |                                 |                                 |                                                                      |                                                          |                                               |                                  |                     |

## 2.4.8: CAR-T cell induced Cytokine Release Syndrome (CRS)

Table S2.4.8.1: Efficacy outcome of trials investigating IL-6R/L blockers in CRS.

| Study                                                                                                                                                                                                                                                                     | Treatment                             | (CAR) T-cell therapy                     | No. of patients (n) | Response by day 14 (%) <sup>a</sup> | Time to response (days) <sup>b</sup> | Response by day 2 (%) | Response by day 7 (%) | Response by day 21 (%) |
|---------------------------------------------------------------------------------------------------------------------------------------------------------------------------------------------------------------------------------------------------------------------------|---------------------------------------|------------------------------------------|---------------------|-------------------------------------|--------------------------------------|-----------------------|-----------------------|------------------------|
| Le 2018 (53)                                                                                                                                                                                                                                                              | TCZ 8 mg/kg (12 mg/kg for pts <30 kg) | CTL019 (Tisagenlecleucel) series         | 45                  | 68.9                                | 4                                    | 20.0                  | 57.8                  | 68.9                   |
|                                                                                                                                                                                                                                                                           |                                       | KTE-C19 (Axicabtagene Ciloleucel) series | 15                  | 53.3                                | 4.5                                  | 20.0                  | 53.3                  | 53.3                   |
| <sup>a</sup> primary analysis (response defined as resolving of CRS within 14 days of 1. dose of TCZ, if no more than 2 doses of TCZ were needed, and if no drugs other than TCZ and GCs were used for treatment)<br><sup>b</sup> median time from first dose to response |                                       |                                          |                     |                                     |                                      |                       |                       |                        |

## 2.4.9: Neuromyelitis optica spectrum disorders (NMOSD)

Table S2.4.9.1: Efficacy outcomes of trials investigating IL-6R/L blockers in NMOSD.

| Study                           | Primary / Secondary outcome                                                                                                                                                                                                                                                                                                             | Timepoint                             | Treatment arm                                                                              | No. of patients (n) | Result                                                   | Hazard Ratio or Difference (95% CI), p-value                                                                                                                                                                                   |
|---------------------------------|-----------------------------------------------------------------------------------------------------------------------------------------------------------------------------------------------------------------------------------------------------------------------------------------------------------------------------------------|---------------------------------------|--------------------------------------------------------------------------------------------|---------------------|----------------------------------------------------------|--------------------------------------------------------------------------------------------------------------------------------------------------------------------------------------------------------------------------------|
| Zhang 2020 (TANGO) (54)         | Time to first relapse (weeks); % first relapse, %confirmed disease progression at 12 weeks, $\Delta$ serum AQP4-IgG titres (change from baseline), $\Delta$ serum AQP4-IgG titres (percentage change), %confirmed disease progression at 24 weeks                                                                                       | $\geq 60$ wks following randomization | AZA (2-3mg/kg) $\pm$ concomitant immunosuppressants                                        | 59                  | 56.7; 47%, 25%, 0, 0%, 10%                               | PE: Time to first relapse (weeks): HR -14.3 (-26.7,-3.4) p=0.0026; HR 0.236 (0.107,0.518) p<0.0001; HR 0.288 (0.105,0.795) p=0.0087; HR -240 (-480,-240) p<0.0001; HR -33% (-50,-17) p<0.0001; HR 0.221 (0.047,1.042) p=0.0004 |
|                                 |                                                                                                                                                                                                                                                                                                                                         |                                       | TCZ 8mg/kg Q4W + concomitant immunosuppressants for the first 12 wks; then TCZ monotherapy | 59                  | 78.9; 14%, 8%, -240, -50%, 3%                            |                                                                                                                                                                                                                                |
| Yamamura 2019 (SAkuraStar) (55) | %protocol-defined relapse; $\Delta$ VAS pain score at wk 24, $\Delta$ FACIT-F score at wk 24, annualized relapse rate, $\Delta$ SF-36 score at wk 24 (physical component), $\Delta$ SF-36 score at wk 24 (mental component), $\Delta$ EDSS score at 24 wk, $\Delta$ EQ-5D score at 24 wk, $\Delta$ modified Rankin scale score at 24 wk | median treatment duration: 107.4 wks  | Placebo + concomitant immunosuppressants                                                   | 42                  | 43%; -3.73, 3.12, 0.32, 2.46, 2.28, -0.21, 0.04, -0.05   | PE: %protocol-defined relapse: 0.38 (0.16,0.88), p=0.02; 4.08 (-8.44,16.61), p=0.52; -3.10 (-8.38,2.18); 0.34 (0.15,0.77);                                                                                                     |
|                                 |                                                                                                                                                                                                                                                                                                                                         |                                       | SAT SC 120 mg wk 0, 2, 4; then Q4W + concomitant immunosuppressants                        | 41                  | 20%; 0.35, 0.02, 0.11, 1.10, -0.03, -0.10, -0.002, -0.03 |                                                                                                                                                                                                                                |

|                                                                                                                               |                                                                                                                                                                                                                                                                                 |                                                                                                              |                                  |    |                                                        |                                                                                                                                |
|-------------------------------------------------------------------------------------------------------------------------------|---------------------------------------------------------------------------------------------------------------------------------------------------------------------------------------------------------------------------------------------------------------------------------|--------------------------------------------------------------------------------------------------------------|----------------------------------|----|--------------------------------------------------------|--------------------------------------------------------------------------------------------------------------------------------|
| Trabousee 2020 (56)                                                                                                           | %protocol-defined relapse; ΔVAS pain score at wk 24, ΔFACIT-F score at wk 24, annualized relapse rate, ΔSF-36 score at wk 24 (physical component), ΔSF-36 score at wk 24 (mental component), ΔEDSS score at 24 wk, ΔEQ-5D score at 24 wk, Δmodified Rankin scale score at 24 wk | Occurrence of 44 protocol-defined relapses or 1.5 years after random assignment of the last enrolled patient | Placebo                          | 32 | 50%; -5.95, 3.60, 0.41, 3.59, 1.39, -0.17, 0.04, -0.19 | PE: %protocol-defined relapse: HR 0.45 (0.23,0.89), p=0.018; 3.21 (-5.09,11.52), p=0.44; 2.11 (-1.01, 5.22); 0.41 (0.21,0.79); |
|                                                                                                                               |                                                                                                                                                                                                                                                                                 |                                                                                                              | SAT SC 120 mg wk 0, 2, 4 and Q4W | 63 | 30%; -2.74, 5.71, 0.17, 2.54,4.84, 0.34, 0.04, -0.03   |                                                                                                                                |
| VAS: Visual Analogue Scale; FACIT-F: Functional Assessment of Chronic Illness Therapy–Fatigue; EQ-5D: EuroQoL-five dimensions |                                                                                                                                                                                                                                                                                 |                                                                                                              |                                  |    |                                                        |                                                                                                                                |



### Section 3: Characteristics of articles and abstracts included: Efficacy for other studied diseases

#### 3.1. Details of articles and abstracts selected for inclusion

Table S3.1.1: Psoriatic arthritis (PsA)

| Study           | Treatment    | Target | Population                                                                   |
|-----------------|--------------|--------|------------------------------------------------------------------------------|
| Mease 2016 (58) | Clazakizumab | IL-6   | NSAID-IR and/or csDMARD-IR; bDMARD naïve; all DMARDs except MTX discontinued |

Table S3.1.2: Axial spondyloarthritis (axSpA)

| Study                        | Treatment   | Target | Population                                                                                                       |
|------------------------------|-------------|--------|------------------------------------------------------------------------------------------------------------------|
| Sieper 2014 (BUILDER-1) (59) | Tocilizumab | IL-6R  | r-axSpA, NSAID-IR, active disease: BASDAI $\geq 4$ + spinal pain $\geq 40$ VAS (0-100 mm); BUILDER-1: TNFi-naïve |
| Sieper 2015 (ALIGN) (60)     | Sarilumab   | IL-6R  | r-axSpA, NSAID-IR, active disease: BASDAI + total back pain score $\geq 4$                                       |

Table S3.1.3: Osteoarthritis (OA)

| Study              | Treatment   | Target | Population                                                                                                                                                                                 |
|--------------------|-------------|--------|--------------------------------------------------------------------------------------------------------------------------------------------------------------------------------------------|
| Richette 2020 (61) | Tocilizumab | IL-6R  | painful hand OA; pain level $\geq 40$ mm VAS pain (0-100 mm); at least 3 painful joints, Kellgren-Lawrence grade $\geq 2$ ; pain not responding to acetaminophen or NSAID and weak opioids |

Table S3.1.4: Polymyalgia rheumatica (PMR)

| Study                                | Treatment   | Target | Population                                                                                                                                                                                                                   |
|--------------------------------------|-------------|--------|------------------------------------------------------------------------------------------------------------------------------------------------------------------------------------------------------------------------------|
| Lally 2016 (62)                      | Tocilizumab | IL-6R  | newly diagnosed PMR, treated with glucocorticoids (GCs) for $< 1$ month and $\leq 20$ mg of prednisone daily or its equivalent                                                                                               |
| Devauchelle-Pensec 2016 (TENOR) (63) | Tocilizumab | IL-6R  | PMR according to Chuang's PMR criteria, symptom onset within the last 12 months; active disease defined as PMR-AS $> 10$ ; either no history of GC or GC for no longer than 1 month stopped at least 7 days before inclusion |

Table S3.1.5: ANCA-associated vasculitis (GPA, MPA)

| Study                                                | Treatment | Target | Population |
|------------------------------------------------------|-----------|--------|------------|
| No study fulfilling criteria for inclusion was found | -         | -      | -          |

Table S3.1.6: Remitting seronegative symmetric synovitis with pitting edema (RS3PE)

| Study                                                | Treatment | Target | Population |
|------------------------------------------------------|-----------|--------|------------|
| No study fulfilling criteria for inclusion was found | -         | -      | -          |

Table S3.1.7: Systemic sclerosis associated interstitial lung disease (SSc-ILD)

| Study                        | Treatment   | Target | Population                                                                                                                                                                                                                                                                                                                                                                                                                                                                                                                                                                                                                                                                                              |
|------------------------------|-------------|--------|---------------------------------------------------------------------------------------------------------------------------------------------------------------------------------------------------------------------------------------------------------------------------------------------------------------------------------------------------------------------------------------------------------------------------------------------------------------------------------------------------------------------------------------------------------------------------------------------------------------------------------------------------------------------------------------------------------|
| Khanna 2020 (focuSSced) (64) | Tocilizumab | IL-6R  | adult patients with: <ul style="list-style-type: none"> <li>• early diffuse cutaneous systemic sclerosis (dcSSc)</li> <li>• classified according to 2013 ACR/EULAR criteria</li> <li>• 60 months total disease duration or less (from first non-raynaud symptom)</li> <li>• mRSS 10-35 units at baseline</li> <li>• elevated acute-phase (CRP <math>\geq 6</math> mg/L, ESR <math>\geq 28</math> mm/h, or platelet count <math>\geq 330 \times 10^9</math>/L)</li> <li>• patients with pulmonary disease with FVC (FVC% predicted) <math>\leq 55\%</math>, or a diffusing capacity for carbon monoxide (DLCo) <math>\leq 45\%</math> were excluded</li> <li>• no immunosuppressive treatment</li> </ul> |

Table S3.1.8: Idiopathic inflammatory myopathies (IIM)

| Study                                     | Treatment   | Target | Population                                                                                                                                                                                           |
|-------------------------------------------|-------------|--------|------------------------------------------------------------------------------------------------------------------------------------------------------------------------------------------------------|
| NCT02043548 (phase 2, not published) (65) | Tocilizumab | IL-6R  | definite or probable polymyositis (PM) or dermatomyositis (DM) classified by Bohan and Peter criteria and refractory to treatment with GC or GC+DMARDs/intravenous immunoglobulin/anti-TNF/Rituximab |

Table S3.1.9: Systemic lupus erythematosus (SLE)

| Study                                     | Treatment                | Target | Population                                                                                                                                                                                                                                                                                                                                                                |
|-------------------------------------------|--------------------------|--------|---------------------------------------------------------------------------------------------------------------------------------------------------------------------------------------------------------------------------------------------------------------------------------------------------------------------------------------------------------------------------|
| Wallace 2017 (phase 2, BUTTERFLY) (66)    | PF-04236921              | IL-6   | adult SLE patients with active disease: <ul style="list-style-type: none"> <li>• SLEDAI-2K <math>\geq 6</math></li> <li>• BILAG Level A disease in <math>\geq 1</math> organ system (except renal or central nervous system)</li> </ul> or <ul style="list-style-type: none"> <li>• BILAG B disease in <math>\geq 2</math> organ systems if no level A disease</li> </ul> |
| Rovin 2016 (phase 2) (67)                 | Sirukumab                | IL-6   | patients with biopsy proven class III or class IV lupus nephritis and persistent proteinuria ( $>0.5$ g/day) despite immunosuppressive treatment (MMF/AZA $\pm$ GC) and renin-angiotensin system blockade                                                                                                                                                                 |
| NCT02437890 (phase 2, not published) (68) | Vobarilizumab (ALX-0061) | IL-6R  | adult patients with moderate to severe active, seropositive systemic lupus erythematosus (SLE)                                                                                                                                                                                                                                                                            |

Table S3.1.10: Primary Sjögren's syndrome (pSS)

| Study            | Treatment   | Target | Population                                                                                                                        |
|------------------|-------------|--------|-----------------------------------------------------------------------------------------------------------------------------------|
| Felten 2020 (69) | Tocilizumab | IL-6R  | pSS according to American European Consensus Group (AECG) criteria and an ESSDAI $\geq$ 5; concomitant GC and/or csDMARDs allowed |

Table S3.1.11: Amyloid A (AA)- Amyloidosis (AAA)

| Study           | Treatment                           | Target                        | Population                                                                                                                                                                                                                              |
|-----------------|-------------------------------------|-------------------------------|-----------------------------------------------------------------------------------------------------------------------------------------------------------------------------------------------------------------------------------------|
| Okuda 2014 (70) | Tocilizumab vs. TNF-i               | IL-6R vs. TNF                 | patients with biopsy-proven AA amyloidosis complicating rheumatic diseases (n=39 rheumatoid arthritis, n=2 juvenile idiopathic arthritis carry-over, n=1 adult-onset Still's disease)                                                   |
| Okuda 2018 (71) | Tocilizumab vs. TNF-i vs. Abatacept | IL-6R vs. TNF vs. CD-80/CD-86 | survey of 199 pat. with AAA with rheumatoid arthritis (60.3%), uncharacterized inflammatory disorders (11.1%), neoplasms (7.0%), other rheumatic diseases (6.5%) etc. TCZ was used in n=66 pat., anti-TNF in n=27 and ABA in n=4 cases. |

Table S3.1.12: Multiple Myeloma (MM)

| Study                          | Treatment  | Target | Population                                                                                                                                                                                                                                                                                                                           |
|--------------------------------|------------|--------|--------------------------------------------------------------------------------------------------------------------------------------------------------------------------------------------------------------------------------------------------------------------------------------------------------------------------------------|
| San-Miguel 2014 (phase 2) (72) | Siltuximab | IL-6   | patients with untreated multiple myeloma and not candidate for high dose chemotherapy with stem cell transplantation due to age ( $\geq 65$ years) or important comorbid conditions.                                                                                                                                                 |
| Brighton 2019 (phase 2) (73)   | Siltuximab | IL-6   | adult patients with High-Risk Smoldering Multiple Myeloma (SMM) for <4 years (defined as BMPC $\geq 10\%$ and either serum M-protein $\geq 3$ g/dL, or abnormal free light chain ratio [ $<0.126$ or $>8$ ] and serum M-protein $\geq 1$ <3g/dL) and an Eastern Cooperative Oncology Group (ECOG) Performance Status score of 0 or 1 |

Table S3.1.13: Refractory relapsing polychondritis

| Study                                                | Treatment | Target | Population |
|------------------------------------------------------|-----------|--------|------------|
| No study fulfilling criteria for inclusion was found | -         | -      | -          |



Table S3.1.14: Cytokine release syndrome CRS (associated with severe SARS-CoV-2 infection, Macrophage activating syndrome)

| Study                                   | Treatment   | Target | Population                                                                                                                                                                                                                                                                                                                                                                                                                                                                                                                                                                                                                                                                                                                                                                                       |
|-----------------------------------------|-------------|--------|--------------------------------------------------------------------------------------------------------------------------------------------------------------------------------------------------------------------------------------------------------------------------------------------------------------------------------------------------------------------------------------------------------------------------------------------------------------------------------------------------------------------------------------------------------------------------------------------------------------------------------------------------------------------------------------------------------------------------------------------------------------------------------------------------|
| Rodriguez-Bano 2020 (SAM-COVID-19) (74) | Tocilizumab | IL-6R  | <p>adult patients with laboratory-confirmed COVID-19 infection by real-time polymerase chain reaction (RT-PCR) assay and admitted to hospital. COVID-19 infection- with at least one clinical criterion and one laboratory criterion suggestive of hyperinflammatory state</p> <p>clinical criteria:</p> <ul style="list-style-type: none"> <li>a) temperature <math>\geq 38^{\circ}\text{C}</math> and b) increase in oxygen support required to achieve O<sub>2</sub> saturation <math>&gt;92\%</math>.</li> </ul> <p>laboratory criteria:</p> <ul style="list-style-type: none"> <li>a) ferritin <math>&gt;2000</math> ng/mL or increase <math>&gt;1000</math> ng/mL since admission, b) D-dimers <math>&gt;1500</math> mg/ mL (or doubled), and c) IL6 <math>&gt;50</math> pg/mL.</li> </ul> |
| Ip 2020 (75)                            | Tocilizumab | IL-6R  | <p>patients with COVID-19 infection confirmed by polymerase chain reaction (PCR) assay and admitted to hospital, did not die during first day of hospitalization, and were not discharged to home within 24 hours. For tocilizumab, exposure was defined as receipt of the drug within the ICU setting</p>                                                                                                                                                                                                                                                                                                                                                                                                                                                                                       |

|                                      |             |       |                                                                                                                                                                                                                                                                                                                                                                                                                                                                                                                                                           |
|--------------------------------------|-------------|-------|-----------------------------------------------------------------------------------------------------------------------------------------------------------------------------------------------------------------------------------------------------------------------------------------------------------------------------------------------------------------------------------------------------------------------------------------------------------------------------------------------------------------------------------------------------------|
| Guaraldi/Meschiari 2020 (TESEO) (76) | Tocilizumab | IL-6R | adult patients with PCR-confirmed severe COVID-19 pneumonia defined as at least one of the following: presence of a respiratory rate of $\geq 30$ breaths per minute, peripheral blood oxygen saturation (SaO <sub>2</sub> ) of $< 93\%$ in room air, a ratio of arterial oxygen partial pressure (PaO <sub>2</sub> ) to fractional inspired oxygen (FiO <sub>2</sub> ) of $< 300$ mm Hg in room air, and lung infiltrates of $> 50\%$ within 24–48 h.                                                                                                    |
| Biran/lp 2020 (77)                   | Tocilizumab | IL-6R | adult patients with PCR-confirmed COVID-19 infection and requiring intensive care unit (ICU) support                                                                                                                                                                                                                                                                                                                                                                                                                                                      |
| Gupta 2020 (STOP-COVID) (78)         | Tocilizumab | IL-6R | adult patients with laboratory confirmed COVID-19 infection admitted to an ICU directly attributable to COVID-19                                                                                                                                                                                                                                                                                                                                                                                                                                          |
| Della-Torre 2020 (79)                | Sarilumab   | IL-6R | patients with PCR-confirmed severe COVID-19 infection as defined by either $\leq 92\%$ of oxygen saturation (room air) or by a partial pressure of arterial oxygen/fraction of inspired oxygen (PaO <sub>2</sub> /FiO <sub>2</sub> ) ratio $\leq 300$ mmHg on supplemental oxygen, and a hyper-inflamed phenotype as defined by an elevation of lactate dehydrogenase (LDH) above the upper limit of normal (ULN), and by at least one of the following: C-reactive protein (CRP) $\geq 100$ mg/L; IL-6 $\geq 40$ pg/ml; or ferritin ( $\geq 900$ ng/ml). |
| Ramiro (CHIC study) 2020 (80)        | Tocilizumab | IL-6R | patients with PCR-confirmed severe COVID-19-associated cytokine storm syndrome (CSS), defined as rapid respiratory deterioration + at least two out of three biomarkers with important elevations (C-reactive protein $>100$ mg/L; ferritin $>900$ $\mu$ g/L; D-dimer $>1500$ $\mu$ g/L), received high-dose intravenous methylprednisolone for 5 consecutive days. If no clinical improvement or worsening in respiratory status, TCZ was added on or after day 2.                                                                                       |
| Hermine 2020 (CORIMUNO-TOCI 1) (81)  | Tocilizumab | IL-6R | adults with confirmed COVID-19 infection (positive on RT-PCR and/or typical chest CT scan) with moderate to severe pneumonia (WHO Clinical Progression Scale [WHO-CPS] score                                                                                                                                                                                                                                                                                                                                                                              |

|                                                       |             |       |                                                                                                                                                                                                                                                                                                                                                                                                                                                                                                       |
|-------------------------------------------------------|-------------|-------|-------------------------------------------------------------------------------------------------------------------------------------------------------------------------------------------------------------------------------------------------------------------------------------------------------------------------------------------------------------------------------------------------------------------------------------------------------------------------------------------------------|
|                                                       |             |       | of 5 with O <sub>2</sub> levels of ≥3 L/min but without noninvasive ventilation [NIV] or mechanical ventilation [MV] or admission to intensive care unit)                                                                                                                                                                                                                                                                                                                                             |
| Salvarani 2020 (RCT-TCZ-COVID-19) (82)                | Tocilizumab | IL-6R | adults with PCR-confirmed COVID-19 pneumonia and presence of acute respiratory failure with PaO <sub>2</sub> /FIO <sub>2</sub> ratio 200-300mmHg, an inflammatory phenotype defined by a temperature > 38 °C during the last 2 days, and/or serum CRP levels ≥10 mg/dL and/or CRP level increased to at least twice the admission measurement                                                                                                                                                         |
| Stone 2020 (phase 3, BACC Bay Tocilizumab Trial) (83) | Tocilizumab | IL-6R | adults with PCR- or IgM antibody assay confirmed COVID-19 infection and: <ul style="list-style-type: none"> <li>• fever (body temperature &gt;38°C) within 72 hours before enrollment</li> <li>• pulmonary infiltrates, or need for supplemental oxygen to maintain oxygen saturation &gt; 92%</li> <li>• at least one of the following laboratory criteria: CRP &gt; 50 mg/L, ferritin &gt; 500 ng/mL, d-dimer level &gt; 1000 ng/mL, or a lactate dehydrogenase (LDH) level &gt;250 U/L.</li> </ul> |
| Salama 2020 (phase 3, EMPACTA) (84)                   | Tocilizumab | IL-6R | adult patients with COVID-19 pneumonia confirmed by PCR and radiographic imaging and SpO <sub>2</sub> < 94% while on ambient air                                                                                                                                                                                                                                                                                                                                                                      |

Table S3.1.15: Tumor necrosis factor receptor-associated periodic fever syndrome (TRAPS)

| Study                                                | Treatment | Target | Population |
|------------------------------------------------------|-----------|--------|------------|
| No study fulfilling criteria for inclusion was found | -         | -      | -          |

Table S3.1.16: Chronic infantile neurological cutaneous and articular syndrome (CINCA)

| Study                                                | Treatment | Target | Population |
|------------------------------------------------------|-----------|--------|------------|
| No study fulfilling criteria for inclusion was found | -         | -      | -          |

Table S3.1.17: Late antibody-mediated kidney transplant rejection (ABMR)

| Study                       | Treatment    | Target | Population                                                                                                                                                                                                                                                                                                                                                                                                                                                                                          |
|-----------------------------|--------------|--------|-----------------------------------------------------------------------------------------------------------------------------------------------------------------------------------------------------------------------------------------------------------------------------------------------------------------------------------------------------------------------------------------------------------------------------------------------------------------------------------------------------|
| Doberer 2020 (phase 2) (85) | Clazakizumab | IL-6   | adult kidney transplant recipients with biopsy-proven late active or chronic active antibody-mediated rejection (ABMR) $\geq 365$ days after transplantation according to Banff 2013/2015 (with or without C4d deposits along the peritubular capillaries), associated with a molecular pattern of ABMR in gene array analysis, detection of HLA class I and/or II antigen-specific antibodies (performed and/or de novo donor-specific antibodies [DSA]) and eGFR $>30$ ml/min/1.73 m <sup>2</sup> |

### 3.2. Risk of bias analysis

Table S3.2.1: Psoriatic arthritis (PsA)

| Study           | Random sequence generation | Allocation concealment | Blinding of participants and personnel | Blinding of outcome assessment | Incomplete outcome data | Selective reporting | Other sources of bias | Summary | Comment |
|-----------------|----------------------------|------------------------|----------------------------------------|--------------------------------|-------------------------|---------------------|-----------------------|---------|---------|
| Mease 2016 (58) | Low                        | Low                    | Low                                    | Low                            | Low                     | Low                 | Unclear               | Unclear |         |

Table S3.2.2: Axial spondyloarthritis (axSpA)

| Study                        | Random sequence generation | Allocation concealment | Blinding of participants and personnel | Blinding of outcome assessment | Incomplete outcome data | Selective reporting | Other sources of bias | Summary | Comment |
|------------------------------|----------------------------|------------------------|----------------------------------------|--------------------------------|-------------------------|---------------------|-----------------------|---------|---------|
| Sieper 2014 (BUILDER-1) (59) | Low                        | Low                    | Low                                    | Low                            | Low                     | Low                 | Low                   | Low     |         |
| Sieper 2015 (ALIGN) (60)     | Low                        | Low                    | Low                                    | Low                            | Low                     | Low                 | Low                   | Low     |         |

Table S3.2.3: Osteoarthritis (OA)

| Study              | Random sequence generation | Allocation concealment | Blinding of participants and personnel | Blinding of outcome assessment | Incomplete outcome data | Selective reporting | Other sources of bias | Summary | Comment |
|--------------------|----------------------------|------------------------|----------------------------------------|--------------------------------|-------------------------|---------------------|-----------------------|---------|---------|
| Richette 2020 (61) | Low                        | Low                    | Low                                    | Low                            | Low                     | Low                 | Low                   | Low     |         |

Table S3.2.4: Polymyalgia rheumatica (PMR)

| Study                                | Random sequence generation | Allocation concealment | Blinding of participants and personnel | Blinding of outcome assessment | Incomplete outcome data | Selective reporting | Other sources of bias | Summary | Comment                                                           |
|--------------------------------------|----------------------------|------------------------|----------------------------------------|--------------------------------|-------------------------|---------------------|-----------------------|---------|-------------------------------------------------------------------|
| Lally 2016 (62)                      | High                       | High                   | High                                   | High                           | Low                     | Low                 | Unclear               | High    | phase 2a, non-blinded, single-center open-label prospective study |
| Devauchelle-Pensec 2016 (TENOR) (63) | High                       | High                   | High                                   | High                           | Low                     | Low                 | Low                   | High    | phase 2 study, no control group, non-randomized design            |

Table S3.2.5: ANCA-associated vasculitis (GPA, MPA)

| Study          | Random sequence generation | Allocation concealment | Blinding of participants and personnel | Blinding of outcome assessment | Incomplete outcome data | Selective reporting | Other sources of bias | Summary | Comment |
|----------------|----------------------------|------------------------|----------------------------------------|--------------------------------|-------------------------|---------------------|-----------------------|---------|---------|
| No study found | -                          | -                      | -                                      | -                              | -                       | -                   | -                     | -       |         |

Table S3.2.6: Remitting seronegative symmetric synovitis with pitting edema (RS3PE)

| Study          | Random sequence generation | Allocation concealment | Blinding of participants and personnel | Blinding of outcome assessment | Incomplete outcome data | Selective reporting | Other sources of bias | Summary | Comment |
|----------------|----------------------------|------------------------|----------------------------------------|--------------------------------|-------------------------|---------------------|-----------------------|---------|---------|
| No study found | -                          | -                      | -                                      | -                              | -                       | -                   | -                     | -       |         |

Table S3.2.7: Systemic sclerosis associated interstitial lung disease (SSc-ILD)

| Study                        | Random sequence generation | Allocation concealment | Blinding of participants and personnel | Blinding of outcome assessment | Incomplete outcome data | Selective reporting | Other sources of bias | Summary | Comment |
|------------------------------|----------------------------|------------------------|----------------------------------------|--------------------------------|-------------------------|---------------------|-----------------------|---------|---------|
| Khanna 2020 (focuSSced) (64) | Low                        | Low                    | Low                                    | Low                            | Low                     | Low                 | Low                   | Low     |         |

Table S3.2.8: Idiopathic inflammatory myopathies (IIM)

| Study                                     | Random sequence generation | Allocation concealment | Blinding of participants and personnel | Blinding of outcome assessment | Incomplete outcome data | Selective reporting | Other sources of bias | Summary | Comment             |
|-------------------------------------------|----------------------------|------------------------|----------------------------------------|--------------------------------|-------------------------|---------------------|-----------------------|---------|---------------------|
| NCT02043548 (phase 2, not published) (65) | -                          | -                      | -                                      | -                              | -                       | -                   | -                     | -       | Not fully published |



Table S3.2.9: Systemic lupus erythematosus (SLE)

| Study                                     | Random sequence generation | Allocation concealment | Blinding of participants and personnel | Blinding of outcome assessment | Incomplete outcome data | Selective reporting | Other sources of bias | Summary | Comment                                                         |
|-------------------------------------------|----------------------------|------------------------|----------------------------------------|--------------------------------|-------------------------|---------------------|-----------------------|---------|-----------------------------------------------------------------|
| Wallace 2017 (phase 2, BUTTERFLY) (66)    | Low                        | Low                    | Low                                    | Low                            | Unclear                 | Unclear             | Low                   | Unclear | 200 mg dosage group terminated prematurely due to safety issues |
| Rovin 2016 (phase 2) (67)                 | Unclear                    | Unclear                | Low                                    | Low                            | Low                     | Low                 | Low                   | Unclear | Randomization sequence generation and allocation not reported   |
| NCT02437890 (phase 2, not published) (68) | -                          | -                      | -                                      | -                              | -                       | -                   | -                     | -       | Not fully published                                             |

Table S3.2.10: Primary Sjögren's syndrome (pSS)

| Study            | Random sequence generation | Allocation concealment | Blinding of participants and personnel | Blinding of outcome assessment | Incomplete outcome data | Selective reporting | Other sources of bias | Summary | Comment |
|------------------|----------------------------|------------------------|----------------------------------------|--------------------------------|-------------------------|---------------------|-----------------------|---------|---------|
| Felten 2020 (69) | Low                        | Low                    | Low                                    | Low                            | Low                     | Low                 | Low                   | Low     |         |

Table S3.2.11: Amyloid A (AA)-Amyloidosis (AAA)

| Study                                                                                     | Representative-ness | Selection of non-exposed cohort | Ascertainment of exposure | Demonstration of outcome of interest | Comparability | Assessment of outcome | Follow-up length | Adequacy of follow-up of cohorts | Summary | Comment |
|-------------------------------------------------------------------------------------------|---------------------|---------------------------------|---------------------------|--------------------------------------|---------------|-----------------------|------------------|----------------------------------|---------|---------|
| Okuda 2014 (70)*                                                                          | Low                 | Low                             | Low                       | Low                                  | Low           | Low                   | Low              | Low                              | Low     |         |
| Okuda 2018 (71)*                                                                          | Low                 | Low                             | Low                       | Low                                  | Low           | Low                   | Low              | Low                              | Low     |         |
| * risk of bias assessment using the Newcastle-Ottawa Scale (NOS) for Case-control studies |                     |                                 |                           |                                      |               |                       |                  |                                  |         |         |

Table S3.2.12: Multiple Myeloma (MM)

| Study                          | Random sequence generation | Allocation concealment | Blinding of participants and personnel | Blinding of outcome assessment | Incomplete outcome data | Selective reporting | Other sources of bias | Summary | Comment    |
|--------------------------------|----------------------------|------------------------|----------------------------------------|--------------------------------|-------------------------|---------------------|-----------------------|---------|------------|
| San-Miguel 2014 (phase 2) (72) | Unclear                    | Unclear                | High                                   | High                           | Low                     | Low                 | Low                   | High    | Open label |
| Brighton 2019 (phase 2) (73)   | Low                        | Low                    | Low                                    | Low                            | Low                     | Low                 | Low                   | Low     |            |

Table S3.2.13: Refractory relapsing polychondritis

| Study          | Random sequence generation | Allocation concealment | Blinding of participants and personnel | Blinding of outcome assessment | Incomplete outcome data | Selective reporting | Other sources of bias | Summary | Comment |
|----------------|----------------------------|------------------------|----------------------------------------|--------------------------------|-------------------------|---------------------|-----------------------|---------|---------|
| No study found | -                          | -                      | -                                      | -                              | -                       | -                   | -                     | -       |         |

Table S3.2.14.1: Cytokine release syndrome CRS (associated with severe SARS-CoV-2 infection, Macrophage activating syndrome): Cohort studies/historically controlled comparison

| Study                                | Representativeness | Selection of non-exposed cohort | Ascertainment of exposure | Demonstration of outcome of interest | Comparability | Assessment of outcome | Follow-up length | Adequacy of follow-up of cohorts | Summary | Comment |
|--------------------------------------|--------------------|---------------------------------|---------------------------|--------------------------------------|---------------|-----------------------|------------------|----------------------------------|---------|---------|
| Rodriguez-Bano 2020 (SAM-COVID) (74) | Low                | Low                             | Low                       | Low                                  | Low           | Low                   | Low              | Low                              | Low     |         |
| Ip 2020 (75)                         | Low                | Low                             | Low                       | Low                                  | Low           | Low                   | Low              | Low                              | Low     |         |
| Guaraldi/Meschiari 2020 (TESEO) (76) | Low                | Low                             | Low                       | Low                                  | Low           | Low                   | Low              | Low                              | Low     |         |

|                               |     |     |     |     |     |     |     |     |     |  |
|-------------------------------|-----|-----|-----|-----|-----|-----|-----|-----|-----|--|
| Biran/Ip 2020 (77)            | Low | Low | Low | Low | Low | Low | Low | Low | Low |  |
| Gupta 2020 (STOP-COVID) (78)  | Low | Low | Low | Low | Low | Low | Low | Low | Low |  |
| Della-Torre 2020 (79)         | Low | Low | Low | Low | Low | Low | Low | Low | Low |  |
| Ramiro (CHIC study) 2020 (80) | Low | Low | Low | Low | Low | Low | Low | Low | Low |  |

Table S3.2.14.2: Cytokine release syndrome CRS (associated with severe SARS-CoV-2 infection, Macrophage activating syndrome): RCTs

| Study                                  | Random sequence generation | Allocation concealment | Blinding of participants and personnel | Blinding of outcome assessment | Incomplete outcome data | Selective reporting | Other sources of bias | Summary | Comment                                                                              |
|----------------------------------------|----------------------------|------------------------|----------------------------------------|--------------------------------|-------------------------|---------------------|-----------------------|---------|--------------------------------------------------------------------------------------|
| Hermine 2020 (CORIMUNO-TOCI 1) (81)    | Low                        | Low                    | High                                   | Unclear                        | Low                     | Low                 | Low                   | High    | Open label                                                                           |
| Salvarani 2020 (RCT-TCZ-COVID-19) (82) | Low                        | Low                    | High                                   | Low                            | Unclear                 | Low                 | Low                   | High    | Open label; trial was prematurely interrupted after an interim analysis for futility |

|                                                       |     |     |     |     |     |     |     |     |  |
|-------------------------------------------------------|-----|-----|-----|-----|-----|-----|-----|-----|--|
| Stone 2020 (phase 3, BACC Bay Tocilizumab Trial) (83) | Low | Low | Low | Low | Low | Low | Low | Low |  |
| Salama 2020 (phase 3, EMPACTA) (84)                   | Low | Low | Low | Low | Low | Low | Low | Low |  |

Table S3.2.15: Tumor necrosis factor receptor-associated periodic fever syndrome (TRAPS)

| Study          | Random sequence generation | Allocation concealment | Blinding of participants and personnel | Blinding of outcome assessment | Incomplete outcome data | Selective reporting | Other sources of bias | Summary | Comment |
|----------------|----------------------------|------------------------|----------------------------------------|--------------------------------|-------------------------|---------------------|-----------------------|---------|---------|
| No study found | -                          | -                      | -                                      | -                              | -                       | -                   | -                     | -       |         |

Table S3.2.16: Chronic infantile neurological cutaneous and articular syndrome (CINCA)

| Study          | Random sequence generation | Allocation concealment | Blinding of participants and personnel | Blinding of outcome assessment | Incomplete outcome data | Selective reporting | Other sources of bias | Summary | Comment |
|----------------|----------------------------|------------------------|----------------------------------------|--------------------------------|-------------------------|---------------------|-----------------------|---------|---------|
| No study found | -                          | -                      | -                                      | -                              | -                       | -                   | -                     | -       |         |

Table S3.2.17: Late antibody-mediated kidney transplant rejection (ABMR)

| Study                                                                                                                                                                      | Random sequence generation | Allocation concealment | Blinding of participants and personnel | Blinding of outcome assessment | Incomplete outcome data | Selective reporting | Other sources of bias | Summary   | Comment                                                                                                                                                                                              |
|----------------------------------------------------------------------------------------------------------------------------------------------------------------------------|----------------------------|------------------------|----------------------------------------|--------------------------------|-------------------------|---------------------|-----------------------|-----------|------------------------------------------------------------------------------------------------------------------------------------------------------------------------------------------------------|
| Doberer 2020 (phase 2) (85)<br><br><i>part A: 12-week randomized, placebo-controlled study period. part B: 40-week open-label extension, all participants received CLZ</i> | Low                        | Low                    | Low                                    | Low                            | Low                     | Low                 | Low                   | Low/High* | randomized pilot trial to evaluate safety (primary endpoint) and efficacy (secondary endpoint analysis) of CLZ.<br><br>*RoB assessment regarding part A of study: low; RoB part B: high (open label) |

### 3.3. Baseline characteristics

#### 3.3.1: Psoriatic arthritis (PsA)

Table S3.3.1.1: Baseline characteristics of trials investigating IL-6R/L blockers in PsA.

| Study                                                                                                                                                                                                                                                                                                        | Treatment               | No. of patients (n) | Mean age (years) | Mean disease duration (years) | Mean SJC 66 | Mean TJC 68 | Mean EGA | Mean CRP (mg/L) | PASI (mean) | Dactylitis (%) | Enthesitis (%)* | Mean HAQ | Mean mTSS |
|--------------------------------------------------------------------------------------------------------------------------------------------------------------------------------------------------------------------------------------------------------------------------------------------------------------|-------------------------|---------------------|------------------|-------------------------------|-------------|-------------|----------|-----------------|-------------|----------------|-----------------|----------|-----------|
| Mease 2016 (58)                                                                                                                                                                                                                                                                                              | Placebo ± MTX           | 41                  | 48.0             | 8.5                           | 11.2        | 21.2        | 58.2     | 11.0            | 7.9         | 41.5           | 80.5            | 1.4      |           |
|                                                                                                                                                                                                                                                                                                              | CLZ SC 25 mg Q4W ± MTX  | 41                  | 49.8             | 9.6                           | 12.4        | 23.0        | 64.0     | 13.2            | 9.1         | 36.6           | 75.6            | 1.4      |           |
|                                                                                                                                                                                                                                                                                                              | CLZ SC 100 mg Q4W ± MTX | 42                  | 49.3             | 5.6                           | 13.8        | 19.0        | 62.5     | 17.4            | 9.5         | 28.6           | 83.3            | 1.3      |           |
|                                                                                                                                                                                                                                                                                                              | CLZ SC 200 mg Q4W ± MTX | 41                  | 44.7             | 4.7                           | 10.8        | 16.6        | 57.8     | 16.2            | 8.7         | 31.7           | 75.6            | 1.4      |           |
| SJC 66: Swollen Joint Count (66 joints); TJC 68: Tender Joint Count (68 joints); EGA: Evaluator Global Assessment of disease activity; PASI: Psoriasis Area and Severity Index; mTSS: PsA modified total Sharp score<br>* based on Spondyloarthritis Research Consortium of Canada enthesitis index (SPARCC) |                         |                     |                  |                               |             |             |          |                 |             |                |                 |          |           |

## 3.3.2: Axial spondyloarthritis (axSpA)

Table S3.3.2.1: Baseline characteristics of trials investigating IL-6R/L blockers in axSpA.

| Study                                                                                                                                                                                                                                                                       | Treatment         | Study population | No. of patients (n) | Mean age (years) | Mean disease duration (years) | HLA-B27 positive (%) | BASDAI | SJ ≥1 (%) | CRP (mg/dL) | ASspiMRI total score (mean) |
|-----------------------------------------------------------------------------------------------------------------------------------------------------------------------------------------------------------------------------------------------------------------------------|-------------------|------------------|---------------------|------------------|-------------------------------|----------------------|--------|-----------|-------------|-----------------------------|
| Sieper 2014 (BUILDER-1) (59)                                                                                                                                                                                                                                                | Placebo           | r-axSpA          | 51                  | 42.7             | 7.5                           | 88                   | 6.8    | 59        | 1.7         |                             |
|                                                                                                                                                                                                                                                                             | TCZ 8 mg/kg Q4W   |                  | 51                  | 41.6             | 5.4                           | 84                   | 6.6    | 65        | 1.6         |                             |
| Sieper 2015 (ALIGN) (60)                                                                                                                                                                                                                                                    | Placebo           | r-axSpA          | 50                  | 40.3             | 9.45                          | 74.0                 |        |           | 56.0*       | 8.8                         |
|                                                                                                                                                                                                                                                                             | SAR SC 100 mg Q2W |                  | 49                  | 42.4             | 8.50                          | 78.7                 |        |           | 55.1*       | 6.8                         |
|                                                                                                                                                                                                                                                                             | SAR SC 150 mg Q2W |                  | 50                  | 43.0             | 8.55                          | 76.0                 |        |           | 54.0*       | 7.8                         |
|                                                                                                                                                                                                                                                                             | SAR SC 100 mg QW  |                  | 52                  | 40.4             | 7.13                          | 78.8                 |        |           | 55.8*       | 9.1                         |
|                                                                                                                                                                                                                                                                             | SAR SC 200 mg Q2W |                  | 50                  | 37.2             | 7.13                          | 78.0                 |        |           | 56.0*       | 9.2                         |
|                                                                                                                                                                                                                                                                             | SAR SC 150 mg QW  |                  | 50                  | 41.1             | 5.55                          | 81.6                 |        |           | 54.0*       | 9.7                         |
| r-axSpA: radiographic axial spondyloarthritis, according to modified New York criteria; BASDAI: Bath Ankylosing Spondylitis Disease Activity Index; SJ: swollen joints; ASspiMRI: Ankylosing Spondylitis spine MRI-active score<br>* patients with CRP level ≤1.5 mg/dL (%) |                   |                  |                     |                  |                               |                      |        |           |             |                             |



## 3.3.3: Osteoarthritis (OA)

Table S3.3.3.1: Baseline characteristics of trials investigating IL-6R/L blockers in OA.

| Study                                                                                                                                                                                                                                                                                                                | Treatment                                        | No. of patients (n) | Mean age (years) | Mean disease duration (years) | Mean VAS pain (0-100 mm) | Mean Morning stiffness (min) | PJ (mean) | SJ (mean) | Mean VAS PGA (0-100 mm) | Mean VAS PhGA (0-100 mm) | Mean FIHOA | Mean CHFS |
|----------------------------------------------------------------------------------------------------------------------------------------------------------------------------------------------------------------------------------------------------------------------------------------------------------------------|--------------------------------------------------|---------------------|------------------|-------------------------------|--------------------------|------------------------------|-----------|-----------|-------------------------|--------------------------|------------|-----------|
| Richette 2020 (61)                                                                                                                                                                                                                                                                                                   | Placebo ± acetaminophen*                         | 41                  | 64.7             | 10.7                          | 59.6                     | 56.8                         | 10.9      | 2.9       | 62.1                    | 58.6                     | 13.7       | 32.6      |
|                                                                                                                                                                                                                                                                                                                      | TCZ 8 mg/kg (week 0 and week 4) ± acetaminophen* | 42                  | 64.1             | 9.1                           | 57.6                     | 33.4                         | 12.5      | 2.9       | 60.3                    | 57.6                     | 13.2       | 29.8      |
| VAS: Visual Analogue Scale; PJ: Painful joints (pressure); SJ: Swollen joints; PGA: Patient global assessment; PhGA: Physician global assessment; FIHOA: Functional Index for Hand Osteoarthritis; CHFS: Cochin Hand Function Scale score<br>* oral NSAIDs were not allowed until week 6 and were allowed thereafter |                                                  |                     |                  |                               |                          |                              |           |           |                         |                          |            |           |

## 3.3.4: Polymyalgia rheumatica (PMR)

Table S3.3.4.1: Baseline characteristics of trials investigating IL-6R/L blockers in PMR.

| Study                                                                                                                                                                                                                                                                                         | Treatment                                         | No. of patients (n) | Mean age (years)  | Mean disease duration (days) | Mean ESR at diagnosis (mm/h) | Mean CRP at diagnosis (mg/dl) | Mean Initial prednisone dose (mg/day) | PMR-AS (ESR)      | Patient VAS pain | Patient VAS fatigue | Patient VAS disease activity | Phys. VAS disease activity |
|-----------------------------------------------------------------------------------------------------------------------------------------------------------------------------------------------------------------------------------------------------------------------------------------------|---------------------------------------------------|---------------------|-------------------|------------------------------|------------------------------|-------------------------------|---------------------------------------|-------------------|------------------|---------------------|------------------------------|----------------------------|
| Lally 2016 (62)                                                                                                                                                                                                                                                                               | TCZ 8mg/kg Q4W for 1 year + rapid GC-12 wks taper | 10                  | 68                |                              | 63.2                         | 3.8 <sup>b</sup>              | 16.5                                  |                   |                  |                     |                              |                            |
|                                                                                                                                                                                                                                                                                               | Comparator group*                                 | 10                  | 72                |                              | 62.5                         | 9.7 <sup>b</sup>              | 16.5                                  |                   |                  |                     |                              |                            |
| Devauchelle-Pensec 2016 (TENOR) (63)                                                                                                                                                                                                                                                          | TCZ 8 mg/kg week 0, 4 and 8                       | 20                  | 66.9 <sup>a</sup> | 99 <sup>a</sup>              | 51.0 <sup>a</sup>            | 65.1 <sup>a</sup>             |                                       | 35.6 <sup>a</sup> | 6.4 <sup>a</sup> | 5.4 <sup>a</sup>    | 6.6 <sup>a</sup>             | 6.8 <sup>a</sup>           |
| PMR-AS: polymyalgia rheumatica activity score<br>* declined participation in the trial, or failed to meet inclusion criteria<br><sup>a</sup> values reported as median<br><sup>b</sup> levels provided are elevations above the upper limit of normal (ULN) of the laboratory reference range |                                                   |                     |                   |                              |                              |                               |                                       |                   |                  |                     |                              |                            |

### 3.3.5: ANCA-associated vasculitis (GPA, MPA)

Table S3.3.5.1: Baseline characteristics of trials investigating IL-6R/L blockers in ANCA-associated vasculitis.

| <b>Study</b>   | <b>Treatment</b> | <b>Study population</b> | <b>No. of patients (n)</b> | <b>Mean age (years)</b> | <b>Mean disease duration (years)</b> | <b>CRP (mg/dL)</b> | <b>ESR (mm/h)</b> |
|----------------|------------------|-------------------------|----------------------------|-------------------------|--------------------------------------|--------------------|-------------------|
| No study found | -                | -                       | -                          | -                       | -                                    | -                  | -                 |

### 3.3.6: Remitting seronegative symmetric synovitis with pitting edema (RS3PE)

Table S3.3.6.1: Baseline characteristics of trials investigating IL-6R/L blockers in RS3PE.

| <b>Study</b>   | <b>Treatment</b> | <b>Study population</b> | <b>No. of patients (n)</b> | <b>Mean age (years)</b> | <b>Mean disease duration (years)</b> | <b>CRP (mg/dL)</b> | <b>ESR (mm/h)</b> |
|----------------|------------------|-------------------------|----------------------------|-------------------------|--------------------------------------|--------------------|-------------------|
| No study found | -                | -                       | -                          | -                       | -                                    | -                  | -                 |

## 3.3.7: Systemic sclerosis associated interstitial lung disease (SSc-ILD)

Table S3.3.7.1: Baseline characteristics of trials investigating IL-6R/L blockers in SSc-ILD.

| Study                                                                                                                                                                                                                                            | Treatment     | No. of patients (n) | Mean age (years) | Mean disease duration (months) | Mean mRSS | Mean FVC% | Mean DLCO%        | Baseline SSc-ILD (%) | Mean CRP (mg/mL) | Mean ESR (mm/h)   | Mean Platelet count ( $\times 10^9/L$ ) | Mean HAQ         |
|--------------------------------------------------------------------------------------------------------------------------------------------------------------------------------------------------------------------------------------------------|---------------|---------------------|------------------|--------------------------------|-----------|-----------|-------------------|----------------------|------------------|-------------------|-----------------------------------------|------------------|
| Khanna 2020 (focuSSced) (64)                                                                                                                                                                                                                     | Placebo       | 106                 | 49.3             | 23.1                           | 20.4      | 83.9      | 76.8 <sup>a</sup> | 65 (68/104)          | 7.0              | 34.7 <sup>b</sup> | 298.7                                   | 1.3 <sup>d</sup> |
|                                                                                                                                                                                                                                                  | TCZ 162 mg QW | 104                 | 47.0             | 22.2                           | 20.3      | 80.3      | 74.4              | 67 (68/102)          | 8.9              | 34.8 <sup>c</sup> | 311.1                                   | 1.1              |
| mRSS: modified Rodnan skin score; FVC: forced vital capacity (predicted); DLCO: diffusing capacity for carbon monoxide (predicted, hemoglobin corrected)<br><sup>a</sup> n=105<br><sup>b</sup> n=103<br><sup>c</sup> n=100<br><sup>d</sup> n=104 |               |                     |                  |                                |           |           |                   |                      |                  |                   |                                         |                  |

### 3.3.8: Idiopathic inflammatory myopathies (IIM)

Table S3.3.8.1: Baseline characteristics of trials investigating IL-6R/L blockers in IIM.

| Study                                                                                     | Treatment                                     | No. of patients (n) | Mean age (years) | Mean disease duration (years) | DM (%) | PM (%) |
|-------------------------------------------------------------------------------------------|-----------------------------------------------|---------------------|------------------|-------------------------------|--------|--------|
| NCT02043548<br>(phase 2, not published) (65)                                              | Placebo ± concomitant GC±csDMARDs±IVIG        | 18                  | 50.4             | NR                            | 72.2   | 27.8   |
|                                                                                           | TCZ 8mg/kg Q4W ± concomitant GC±csDMARDs±IVIG | 18                  | 52.3             | NR                            | 55.6   | 44.4   |
| IVIG: Intravenous immunoglobulin; NR: not reported; DM: dermatomyositis; PM: polymyositis |                                               |                     |                  |                               |        |        |

## 3.3.9: Systemic lupus erythematosus (SLE)

Table S3.3.9.1: Baseline characteristics of trials investigating IL-6R/L blockers in SLE.

| Study                                     | Treatment                                 | No. of patients (n) | Mean age (years) | Mean SLE duration (years) | Mean LN duration (years) | Mean SLEDAI-2K score | BILAG A in ≥1 organ system (%) | BILAG B in ≥2 organ systems (%) | Mean PhGA score | Renal biopsy class III LN (%) | Renal biopsy class IV LN (%) |
|-------------------------------------------|-------------------------------------------|---------------------|------------------|---------------------------|--------------------------|----------------------|--------------------------------|---------------------------------|-----------------|-------------------------------|------------------------------|
| Wallace 2017 (phase 2, BUTTERFLY) (66)    | Placebo ± GC+csDMARDs                     | 45                  | 42.3             | 9.1                       |                          | 9.5                  | 44.4                           | 55.6                            | 1.6             |                               |                              |
|                                           | PF-04236921 10 mg SC Q8W ± GC+csDMARDs    | 45                  | 39.9             | 7.9                       |                          | 9.6                  | 42.2                           | 60.0                            | 1.7             |                               |                              |
|                                           | PF-04236921 50 mg SC Q8W ± GC+csDMARDs    | 47                  | 38.3             | 7.5                       |                          | 9.0                  | 34.0                           | 70.2                            | 1.6             |                               |                              |
|                                           | PF-04236921 200 mg SC Q8W ± GC+csDMARDs * | 46                  | 41.3             | 8.6                       |                          | 10.1                 | 54.3                           | 56.5                            | 1.8             |                               |                              |
| Rovin 2016 (phase 2) (67)                 | Placebo + GC+csDMARD                      | 4                   | 37.8             | 6.5                       | 3.8                      | 18.0                 |                                |                                 | 4.5             | 50                            | 50                           |
|                                           | SIR 10 mg/kg IV Q4W + GC+csDMARD          | 21                  | 30.6             | 8.1                       | 5.2                      | 15.7                 |                                |                                 | 4.2             | 33.3                          | 66.7                         |
| NCT02437890 (phase 2, not published) (68) | Placebo                                   | 62                  | 42.3             |                           |                          |                      |                                |                                 |                 |                               |                              |
|                                           | ALX-0061 75 mg Q4W                        | 64                  | 42.0             |                           |                          |                      |                                |                                 |                 |                               |                              |
|                                           | ALX-0061 150 mg Q4W                       | 62                  | 41.8             |                           |                          |                      |                                |                                 |                 |                               |                              |
|                                           | ALX-0061 150 mg Q2W                       | 62                  | 39.2             |                           |                          |                      |                                |                                 |                 |                               |                              |

|                                                                                                                                                                                                                                     |                     |    |      |  |  |  |  |  |  |  |
|-------------------------------------------------------------------------------------------------------------------------------------------------------------------------------------------------------------------------------------|---------------------|----|------|--|--|--|--|--|--|--|
|                                                                                                                                                                                                                                     | ALX-0061 225 mg Q2W | 62 | 42.0 |  |  |  |  |  |  |  |
| LN: lupus nephritis; SLEDAI-2K: Systemic Lupus Erythematosus Disease Activity Index 2000; BILAG: British Isles Lupus Assessment Group; PhGA: Physician global assessment<br>* treatment group terminated early due to safety issues |                     |    |      |  |  |  |  |  |  |  |

### 3.3.10: Primary Sjögren's syndrome (pSS)

Table S3.3.10.1: Baseline characteristics of trials investigating IL-6R/L blockers in pSS.

| Study                                                                                                                                                                                                                                  | Treatment                        | No. of patients (n) | Mean age (years) | Mean disease duration (months) | Median ESSDAI | Mean PhGA | Mean ESSPRI | Steroids at BL (%) | Other immune-modulatory drugs at BL (%) | Median CRP |
|----------------------------------------------------------------------------------------------------------------------------------------------------------------------------------------------------------------------------------------|----------------------------------|---------------------|------------------|--------------------------------|---------------|-----------|-------------|--------------------|-----------------------------------------|------------|
| Felten 2020 (69)                                                                                                                                                                                                                       | Placebo ± GC ±csDMARDs           | 55                  | 54.8             | 4.9                            | 10            | 5.1       | 6.4         | 9.1                | 10.9                                    | 4          |
|                                                                                                                                                                                                                                        | TCZ 8mg/kg IV Q4W ± GC ±csDMARDs | 55                  | 50.9             | 4.4                            | 11            | 5.2       | 6.4         | 16.4               | 12.7                                    | 4.4        |
| ESSDAI: European League Against Rheumatism Sjögren's Syndrome Disease Activity Index; ESSPRI: EULAR Sjögren's Syndrome Patient Reported Index; PhGA: Physician's global evaluation of systemic disease activity (Visual Numeric Scale) |                                  |                     |                  |                                |               |           |             |                    |                                         |            |



## 3.3.11: Amyloid A (AA)-Amyloidosis (AAA)

Table S3.3.11.1: Baseline characteristics of trials investigating IL-6R/L blockers in AAA

| Study           | Treatment    | No. of patients (n) | Median age (years) | Median disease duration (years) | Median SAA ( $\mu\text{g/mL}$ ) | Median CRP (mg/dL) | Renal involvement (%) | GI symptoms or signs (%) | Cardiac involvement (%) | Median CDAI |
|-----------------|--------------|---------------------|--------------------|---------------------------------|---------------------------------|--------------------|-----------------------|--------------------------|-------------------------|-------------|
| Okuda 2014 (70) | TCZ          | 22                  | 61.5               | 20.5                            | 219.2                           | 3.1                | 81.8                  | 36.4                     | 13.6                    | 15.7        |
|                 | TNF-i        | 32                  | 68.5               | 18.0                            | 143.6                           | 2.0                | 31.3                  | 28.1                     | 3.1                     | 19.1        |
| Okuda 2018 (71) | All patients | 199                 | 65                 | NR                              | 59.9                            | 1.14               | 76.4                  | 39.7                     | 11.6                    | NR          |
|                 | TCZ          | 66                  | NR                 | NR                              | NR                              | NR                 | NR                    | NR                       | NR                      | NR          |
|                 | TNF-i        | 27                  | NR                 | NR                              | NR                              | NR                 | NR                    | NR                       | NR                      | NR          |
|                 | ABA          | 4                   | NR                 | NR                              | NR                              | NR                 | NR                    | NR                       | NR                      | NR          |

SAA: serum amyloid A; GI: gastrointestinal; NR: not reported

## 3.3.12: Multiple Myeloma (MM)

Table S3.3.12.1: Baseline characteristics of trials investigating IL-6R/L blockers in MM.

| Study                                                                                                                                                                                                                                                                                                                                                                                                                                                                                                                                                                                                                                                            | Treatment                 | No. of patients (n) | Median age (years) | Type of myeloma IgG/IgA/Light chain/Biclonal (%)     | ISS Staging I/II/III (%)         | Cytogenetic abnormality: high risk (%) <sup>a</sup> | % Plasma cells, bone marrow biopsy/aspilate >30 (%) | Median hemoglobin (g/L) | Median platelet (×10 <sup>9</sup> /L) | Median Creatinine clearance (mL/min) |
|------------------------------------------------------------------------------------------------------------------------------------------------------------------------------------------------------------------------------------------------------------------------------------------------------------------------------------------------------------------------------------------------------------------------------------------------------------------------------------------------------------------------------------------------------------------------------------------------------------------------------------------------------------------|---------------------------|---------------------|--------------------|------------------------------------------------------|----------------------------------|-----------------------------------------------------|-----------------------------------------------------|-------------------------|---------------------------------------|--------------------------------------|
| San-Miguel 2014 (phase 2) (72)*                                                                                                                                                                                                                                                                                                                                                                                                                                                                                                                                                                                                                                  | VMP                       | 54                  | 70.0               | 68.5/18.5/11/2                                       | 5/41/54                          | 10                                                  | 68.5                                                | 101.50                  | 225.5                                 | 56.40                                |
|                                                                                                                                                                                                                                                                                                                                                                                                                                                                                                                                                                                                                                                                  | SIL 11 mg/kg IV Q3W + VMP | 52                  | 71.0               | 42/41/15/2                                           | 8/38/54                          | 17                                                  | 65                                                  | 103.50                  | 236.5                                 | 58.38                                |
|                                                                                                                                                                                                                                                                                                                                                                                                                                                                                                                                                                                                                                                                  |                           |                     |                    | high-risk cytogenetic abnormalities (%) <sup>b</sup> | ultra-high risk SMM <sup>c</sup> |                                                     |                                                     |                         |                                       |                                      |
| Brighton 2019 (phase 2) (73)                                                                                                                                                                                                                                                                                                                                                                                                                                                                                                                                                                                                                                     | Placebo                   | 42                  | 62                 | 82                                                   | 41                               |                                                     |                                                     |                         |                                       |                                      |
|                                                                                                                                                                                                                                                                                                                                                                                                                                                                                                                                                                                                                                                                  | SIL 15 mg/kg IV Q3W       | 43                  | 62                 | 65                                                   | 23                               |                                                     |                                                     |                         |                                       |                                      |
| <p>VMP: velcade (bortezomib)-melphalan-prednisone; ISS: International Staging System</p> <p>* part 1 (single-arm lead-in for safety evaluation): VMP+Siltuximab 11 mg/kg IV Q3W</p> <p>* part 2 (patients were randomized 1:1 to SIL+VMP or VMP): VMP+Siltuximab 8.3 mg/kg or 11 mg/kg Q3W</p> <p><sup>a</sup> high-risk abnormality defined as t(4;14), t(14;16), and del17p</p> <p><sup>b</sup> high-risk cytogenetic abnormalities defined as: t(4;14), t(14;16), 17p deletion by FISH; t(4;14), 17p deletion by karyotype</p> <p><sup>c</sup> ultra-highrisk SMM by IMWG 2014 criteria [60% plasma cells or highrisk FLC ratio (0.01 or 100) at baseline</p> |                           |                     |                    |                                                      |                                  |                                                     |                                                     |                         |                                       |                                      |

### 3.3.13: Refractory relapsing polychondritis

Table S3.3.13.1: Baseline characteristics of trials investigating IL-6R/L blockers in refractory relapsing polychondritis.

| <b>Study</b>   | <b>Treatment</b> | <b>Study population</b> | <b>No. of patients (n)</b> | <b>Mean age (years)</b> | <b>Mean disease duration (years)</b> | <b>CRP (mg/dL)</b> | <b>ESR (mm/h)</b> |
|----------------|------------------|-------------------------|----------------------------|-------------------------|--------------------------------------|--------------------|-------------------|
| No study found | -                | -                       | -                          | -                       | -                                    | -                  | -                 |

### 3.3.13: Cytokine release syndrome CRS (associated with severe SARS-CoV-2 infection, Macrophage activating syndrome)

Table S3.3.14.1: Baseline characteristics of trials investigating IL-6R/L blockers in CRS (associated with severe SARS-CoV-2 infection, Macrophage activating syndrome): Cohort studies I

| Study                                | Treatment                 | No. of patients (n) | Median age (years) | Comorbidity: hypertension (%) | Comorbidity: cardiac disease (%) | Comorbidity: obesity (%) | Comorbidity: chronic renal failure (%) | Comorbidity: chronic pulmonary disease (%) | Median days of symptoms | Fever (%) | Ferritin >2000 ng/mL (%) | D-dimers >1500 µg/mL (%) | Worsening in O <sub>2</sub> requirements (%) |
|--------------------------------------|---------------------------|---------------------|--------------------|-------------------------------|----------------------------------|--------------------------|----------------------------------------|--------------------------------------------|-------------------------|-----------|--------------------------|--------------------------|----------------------------------------------|
| Rodriguez-Bano 2020 (SAM-COVID) (74) | No treatment              | 344                 | 69                 | 50.9                          | 18.0                             | 11.4                     | 3.8                                    | 10.8                                       | 8                       | 58.7      | 49.0                     | 61.7                     | 66.9                                         |
|                                      | TCZ                       | 88                  | 66                 | 34.1                          | 12.5                             | 14.3                     | 0                                      | 6.8                                        | 10                      | 47.7      | 32.2                     | 52.4                     | 92.0                                         |
|                                      | GC intermediate-high dose | 117                 | 71                 | 52.1                          | 17.9                             | 17.1                     | 2.6                                    | 15.4                                       | 10                      | 55.6      | 43.6                     | 49.1                     | 74.4                                         |
|                                      | GC pulse dose             | 78                  | 71                 | 53.8                          | 14.1                             | 7.4                      | 6.4                                    | 11.5                                       | 6                       | 48.7      | 46.8                     | 54.8                     | 89.7                                         |
|                                      | GC + TCZ                  | 151                 | 65                 | 48.3                          | 11.3                             | 17.2                     | 0.7                                    | 11.3                                       | 11                      | 51.0      | 51.0                     | 55.7                     | 90.1                                         |

Table S3.3.14.2: Baseline characteristics of trials investigating IL-6R/L blockers in CRS (associated with severe SARS-CoV-2 infection, Macrophage activating syndrome): Cohort studies II

| Study        | Treatment | No. of patients (n) | Median age (years) | Comorbidity: hypertension (%) | Comorbidity: coronary disease (%) | Comorbidity: obesity (%) | Comorbidity: renal failure (%) | Comorbidity: COPD/asthma (%) | Oxygenation < 94% (%) | Steroids (%) | HCQ+AZI (%) |
|--------------|-----------|---------------------|--------------------|-------------------------------|-----------------------------------|--------------------------|--------------------------------|------------------------------|-----------------------|--------------|-------------|
| Ip 2020 (75) | No TCZ    | 413                 | 69                 | 79                            | 77                                | 75                       | 85                             | 78                           | 75                    | 75           | 69          |
|              | TCZ*      | 134                 | 62                 | 21                            | 23                                | 25                       | 15                             | 22                           | 25                    | 25           | 31          |

HCQ: hydroxychloroquine; AZI: azithromycin  
 \* TCZ administration of at least one dose, and if given after entering the ICU. TCZ was administered as a single dose in 104 (78%), with the majority receiving 400 mg (96%), followed by 800 mg (1%), 8 mg/kg (1%), 4 mg/kg (1%), and missing dosing (1%).

Table S3.3.14.3: Baseline characteristics of trials investigating IL-6R/L blockers in CRS (associated with severe SARS-CoV-2 infection, Macrophage activating syndrome): Cohort studies III

| Study                                                                                       | Treatment            | No. of patients (n) | Median age (years) | Median PaO <sub>2</sub> /FiO <sub>2</sub> (mmHg) | Median SOFA score | Duration of symptoms (median, days from symptom onset) |
|---------------------------------------------------------------------------------------------|----------------------|---------------------|--------------------|--------------------------------------------------|-------------------|--------------------------------------------------------|
| Guaraldi/Meschiari 2020 (TESEO) (76): Characteristics of patients from all centres combined | Standard care*       | 365                 | 69                 | 277                                              | 2                 | 5                                                      |
|                                                                                             | TCZ* + Standard care | 179                 | 64                 | 169                                              | 3                 | 7                                                      |

PaO<sub>2</sub>/FiO<sub>2</sub>: ratio of arterial oxygen partial pressure to fractional inspired oxygen; SOFA: Subsequent Organ Failure Assessment  
 \* standard of care: supplemental oxygen, hydroxychloroquine, azithromycin, antiretrovirals, and low molecular weight heparin  
 \*\* TCZ administered IV 8 mg/kg (up to a maximum of 800 mg) in two infusions, 12 h apart, or SC 162 mg in two simultaneous doses (ie, 324 mg in total), if IV was not available.

Table S3.3.14.4: Baseline characteristics of trials investigating IL-6R/L blockers in CRS (associated with severe SARS-CoV-2 infection, Macrophage activating syndrome): Cohort studies IV

| Study              | Treatment | No. of patients (n) | Median age (years) | Comorbidity count $\geq 3$ (%) | Fever (%) | Shortness of breath (%) | Oxygenation < 94% (%) | qSOFA score 2 (%) | Intubation or ventilator (%) | Steroids (%) | HCQ+AZI at BL(%) |
|--------------------|-----------|---------------------|--------------------|--------------------------------|-----------|-------------------------|-----------------------|-------------------|------------------------------|--------------|------------------|
| Biran/Ip 2020 (77) | No TCZ*   | 420                 | 65                 | 35                             | 71        | 73                      | 49                    | 6                 | 93                           | 45           | 46               |
|                    | TCZ*      | 210                 | 62                 | 30                             | 77        | 80                      | 49                    | 4                 | 94                           | 46           | 65               |

data reported as median; qSOFA: quickSOFA-Score  
 \* propensity score-matched patients (variables used for matching: age, gender, diabetes, COPD or asthma, hypertension, cancer, renal failure, obesity, oxygenation 15 mg/dL, and intubation or mechanical ventilator support). Exposure to TCZ was defined as receipt of the drug as found in the electronic health record. The Pharmacy and Therapeutics Committee suggested one intravenous dose of 400 mg tocilizumab.

Table S3.3.14.5: Baseline characteristics of trials investigating IL-6R/L blockers in CRS (associated with severe SARS-CoV-2 infection, Macrophage activating syndrome): Cohort studies V

| Study                        | Treatment  | No. of patients (n) | Median age (years) | Comorbidity: hypertension (%) | Comorbidity: coronary disease (%) | Median BMI (kg/m <sup>2</sup> ) | Symptom onset to ICU $\leq 3$ days (%) | Fever >38°C (%) | PaO <sub>2</sub> /FiO <sub>2</sub> ratio <200 mmHg (%) | HCQ at ICU (%) |
|------------------------------|------------|---------------------|--------------------|-------------------------------|-----------------------------------|---------------------------------|----------------------------------------|-----------------|--------------------------------------------------------|----------------|
| Gupta 2020 (STOP-COVID) (78) | No TCZ*    | 3491                | 63                 | 62.6                          | 14.4                              | 30.4                            | 23.9                                   | 47.2            | 37.9                                                   | 45.4           |
|                              | TCZ IV/SC* | 433                 | 58                 | 54.0                          | 9.0                               | 31.6                            | 13.4                                   | 47.8            | 47.3                                                   | 63.0           |

data reported as median and before IPW (inverse probability weighting)  
 \* patients were categorized according to whether they received or did not receive tocilizumab during the first 2 days of ICU admission.

Table S3.3.14.6: Baseline characteristics of trials investigating IL-6R/L blockers in CRS (associated with severe SARS-CoV-2 infection, Macrophage activating syndrome): Cohort studies VI

| Study                                                                                                                                                                                                                                                                                                                      | Treatment                          | No. of patients (n) | Median age (years) | Duration of symptoms before enrollment (days) | Non-invasive positive-pressure ventilation (%) | High-flow oxygen (FiO <sub>2</sub> ≥40 mmHg) | PaO <sub>2</sub> /FiO <sub>2</sub> ratio <100 (%) | Fever >38°C (%) | CRP (mg/L) | LDH (IU/L) | CT-based lung consolidation (%) |
|----------------------------------------------------------------------------------------------------------------------------------------------------------------------------------------------------------------------------------------------------------------------------------------------------------------------------|------------------------------------|---------------------|--------------------|-----------------------------------------------|------------------------------------------------|----------------------------------------------|---------------------------------------------------|-----------------|------------|------------|---------------------------------|
| Della-Torre 2020 (79)                                                                                                                                                                                                                                                                                                      | Standard of care*                  | 28                  | 57                 | 7                                             | 71                                             | 28                                           | 46                                                | 54              | 152        | 495        | 14.2 <sup>a</sup>               |
|                                                                                                                                                                                                                                                                                                                            | SAR** IV 400 mg + Standard of care | 28                  | 56                 | 7                                             | 75                                             | 25                                           | 60                                                | 64              | 143        | 468        | 16.6 <sup>b</sup>               |
| data reported as median<br>* all patients received oral therapy with lopinavir/ritonavir, hydroxychloroquine and azithromycin as per local institutional standard of care at time of admission.<br>** SAR was initiated within 24hours from the fulfilment of inclusion criteria.<br><sup>a</sup> n=6<br><sup>b</sup> n=20 |                                    |                     |                    |                                               |                                                |                                              |                                                   |                 |            |            |                                 |

Table S3.3.14.7: Baseline characteristics of trials investigating IL-6R/L blockers in CRS (associated with severe SARS-CoV-2 infection, Macrophage activating syndrome): Historically controlled comparison

| Study                                                                                                                                                                                                                                                                                                                                                                                                                                                                                           | Treatment                       | No. of patients (n) | Mean age (years) | Mean WHO Score | COPD (%) | Mean BMI (kg/m <sup>2</sup> ) | Cardiovascular disease (%) | High-flow oxygen (%) | Mechanical ventilation (%) | Mean CO-RADS | Mean CRP (mg/L) | Chloroquine at BL (%) |
|-------------------------------------------------------------------------------------------------------------------------------------------------------------------------------------------------------------------------------------------------------------------------------------------------------------------------------------------------------------------------------------------------------------------------------------------------------------------------------------------------|---------------------------------|---------------------|------------------|----------------|----------|-------------------------------|----------------------------|----------------------|----------------------------|--------------|-----------------|-----------------------|
| Ramiro (CHIC study) 2020 (80)                                                                                                                                                                                                                                                                                                                                                                                                                                                                   | Control group*                  | 86                  | 67               | 4.4            | 8        | 29.7                          | 13                         | 8                    | 15                         | 4.8          | 167             | 79                    |
|                                                                                                                                                                                                                                                                                                                                                                                                                                                                                                 | Treated group** (TCZ 37/86;43%) | 86                  | 67               | 4.3            | 12       | 28.0                          | 20                         | 23                   | 1                          | 4.7          | 160             | 77                    |
| CO-RADS: COVID-19 CT Classification; WHO score (1-7): 1) non-hospitalised, able to resume normal activities; 2) non-hospitalised, but unable to resume normal activities; 3) hospitalised, not requiring oxygen therapy; 4) hospitalised, requiring additional oxygen therapy; 5) hospitalised, requiring high-flow nasal oxygen therapy, non-invasive mechanical ventilation or both; 6) hospitalised, requiring extracorporeal membrane oxygenation, mechanical ventilation or both; 7) death |                                 |                     |                  |                |          |                               |                            |                      |                            |              |                 |                       |

BMI: body mass index; COPD: chronic obstructive pulmonary disease

\* control patients with COVID-19-associated CSS (same definition) were retrospectively sampled from the pool of patients (n=350) admitted between 7 March and 31 March 2020, and matched 1:1 to treated patients on sex and age

\*\* two-steps treatment: (1) methylprednisolone (MP) 250mg IV on day 1, followed by MP 80mg intravenously on days 2–5, and an option for a 2-day extension if considered necessary and safe; (2) escalation with TCZ, between day 2 and day 5 (single-dose TCZ, 8mg/kg body weight intravenous, max 800mg). Criteria for escalation with TCZ were lack of clinical improvement or worsening in respiratory status (assessed on WHO scale).

Table S3.3.14.8: Baseline characteristics of trials investigating IL-6R/L blockers in CRS (associated with severe SARS-CoV-2 infection, Macrophage activating syndrome): RCTs

| Study                                  | Treatment                                                                              | No. of patients (n) | Median age (years) | Symptom onset to randomization (days) | Diabetes (%) | Hypertension (%)  | COPD (%) | Respiratory rate (median bpm) | Median PaO <sub>2</sub> /FIO <sub>2</sub> (mmHg) | Median CRP (mg/L) | Hydroxy-chloroquine at BL (%) |
|----------------------------------------|----------------------------------------------------------------------------------------|---------------------|--------------------|---------------------------------------|--------------|-------------------|----------|-------------------------------|--------------------------------------------------|-------------------|-------------------------------|
| Hermine 2020 (CORIMUNO-TOCI 1) (81)    | Usual care (UC)*                                                                       | 67                  | 63.3               | 10                                    | 34           | 30.0 <sup>a</sup> | 5        | 26.0                          |                                                  | 127.0             |                               |
|                                        | TCZ** IV 8mg/kg on day 1 + UC                                                          | 63                  | 64.0               | 10                                    | 33           | 33 <sup>a</sup>   | 5        | 24.0                          |                                                  | 119.5             |                               |
| Salvarani 2020 (RCT-TCZ-COVID-19) (82) | Standard care (±TCZ as rescue)                                                         | 66                  | 60.0               | 8.0                                   | 13.6         | 43.9              | 3.0      | 20.0                          | 268.2                                            | 6.5 <sup>b</sup>  | 93.9                          |
|                                        | Early administration of TCZ IV 8mg/kg on day 1 and 2 <sup>nd</sup> dose after 12 hours | 60                  | 61.5               | 7.0                                   | 16.7         | 45.0              | 3.3      | 20.0                          | 262.5                                            | 10.5 <sup>b</sup> | 88.3                          |
| Stone 2020 (phase 3,                   | Placebo + Standard care                                                                | 82                  | 56.5               | 10.0                                  | 37           | 46                | 9        |                               |                                                  | 94.3              |                               |



|                                                                                                                                                                                                                                                                                                                                                                                                                                                                                   |                                                |     |                   |     |    |    |   |  |  |                     |  |
|-----------------------------------------------------------------------------------------------------------------------------------------------------------------------------------------------------------------------------------------------------------------------------------------------------------------------------------------------------------------------------------------------------------------------------------------------------------------------------------|------------------------------------------------|-----|-------------------|-----|----|----|---|--|--|---------------------|--|
| BACC Bay Tocilizumab Trial) (83)                                                                                                                                                                                                                                                                                                                                                                                                                                                  | TCZ IV 8mg/kg (max. 800 mg) + Standard care    | 161 | 61.6              | 9.0 | 28 | 50 | 9 |  |  | 116.0               |  |
| Salama 2020 (phase 3, EMPACTA) (84)                                                                                                                                                                                                                                                                                                                                                                                                                                               | Placebo + Standard care                        | 128 | 55.6 <sup>c</sup> |     |    |    |   |  |  | 143.40 <sup>c</sup> |  |
|                                                                                                                                                                                                                                                                                                                                                                                                                                                                                   | TCZ IV 8mg/kg (max. 800 mg) ***+ Standard care | 249 | 56.0 <sup>c</sup> |     |    |    |   |  |  | 124.50 <sup>c</sup> |  |
| bpm: breaths per minute<br>* usual care: antibiotic agents, antiviral agents, corticosteroids, vasopressor support, anticoagulants<br>** additional administration of TCZ 400 mg IV on day 3 was recommended if oxygen requirement was not decreased by more than 50% (decision by treating physician)<br>*** up to one additional infusion may be given<br><sup>a</sup> chronic cardiac disease<br><sup>b</sup> values reported as mg/dL<br><sup>c</sup> values reported as mean |                                                |     |                   |     |    |    |   |  |  |                     |  |

### 3.3.15: Tumor necrosis factor receptor-associated periodic fever syndrome (TRAPS)

Table S3.3.15.1: Baseline characteristics of trials investigating IL-6R/L blockers in TRAPS.

| Study          | Treatment | Study population | No. of patients (n) | Mean age (years) | Mean disease duration (years) | CRP (mg/dL) | ESR (mm/h) |
|----------------|-----------|------------------|---------------------|------------------|-------------------------------|-------------|------------|
| No study found | -         | -                | -                   | -                | -                             | -           | -          |

### 3.3.16: Chronic infantile neurological cutaneous and articular syndrome (CINCA)

Table S3.3.16.1: Baseline characteristics of trials investigating IL-6R/L blockers in CINCA.

| <b>Study</b>   | <b>Treatment</b> | <b>Study population</b> | <b>No. of patients (n)</b> | <b>Mean age (years)</b> | <b>Mean disease duration (years)</b> | <b>CRP (mg/dL)</b> | <b>ESR (mm/h)</b> |
|----------------|------------------|-------------------------|----------------------------|-------------------------|--------------------------------------|--------------------|-------------------|
| No study found | -                | -                       | -                          | -                       | -                                    | -                  | -                 |

## 3.3.17: Late antibody-mediated kidney transplant rejection (ABMR)

Table S3.3.17.1: Baseline characteristics of trials investigating IL-6R/L blockers in ABMR.

| Study                                                                                                                                                                  | Treatment                                                                                  | No. of patients (n) | Median recipient age (years) | Median age of study patients (years) | HLA class I and II DSA (%) | Active ABMR (%) | Chronic/active ABMR (%) | C4d-positive ABMR (%) | Median CRP (mg/dL) | Median eGFR (ml/min) | TTV load (copies/ml)  |
|------------------------------------------------------------------------------------------------------------------------------------------------------------------------|--------------------------------------------------------------------------------------------|---------------------|------------------------------|--------------------------------------|----------------------------|-----------------|-------------------------|-----------------------|--------------------|----------------------|-----------------------|
| Doberer 2020 (phase 2) (85)<br><i>part A: 12-week randomized, placebo-controlled study period. part B: 40-week open-label extension, all participants received CLZ</i> | Placebo + calcineurin- or mTOR inhibitor-based (triple) immunosuppressive therapy          | 10                  | 31.4                         | 39.6                                 | 20                         | 0               | 100                     | 30                    | 0.42               | 39.2                 | 6.0 x 10 <sup>5</sup> |
|                                                                                                                                                                        | CLZ SC 25 mg Q4W + calcineurin- or mTOR inhibitor-based (triple) immunosuppressive therapy | 10                  | 37.4                         | 47.2                                 | 20                         | 20              | 80                      | 40                    | 0.13               | 40.5                 | 7.2 x 10 <sup>4</sup> |
| TTV: Torque Teno virus                                                                                                                                                 |                                                                                            |                     |                              |                                      |                            |                 |                         |                       |                    |                      |                       |

### 3.4. Efficacy outcomes

#### 3.4.1: Psoriatic arthritis (PsA)

Table S3.4.1.1: Efficacy outcomes of trials investigating IL-6R/L blockers in PsA.

| Study                                                                                                                                                                                                                                                               | Treatment               | No. of patients (n) | Timepoint (weeks)                | ACR20 (%)                                | ACR50 (%)                                | ACR70 (%)                                | ΔDAPSA (%) | MDA (%) | PASI 75 (%)                              | ΔHAQ                                       | Dactylitis (%)*                      | ΔSPARCC                                  | ΔmTSS |
|---------------------------------------------------------------------------------------------------------------------------------------------------------------------------------------------------------------------------------------------------------------------|-------------------------|---------------------|----------------------------------|------------------------------------------|------------------------------------------|------------------------------------------|------------|---------|------------------------------------------|--------------------------------------------|--------------------------------------|------------------------------------------|-------|
| Mease 2016 (58)                                                                                                                                                                                                                                                     | Placebo ± MTX           | 41                  | 16 <sup>a</sup> /24 <sup>b</sup> | 29.3 <sup>a</sup> /<br>34.1 <sup>b</sup> | 7.3 <sup>a</sup> /<br>4.6 <sup>b</sup>   | 2.4 <sup>a</sup> /<br>4.9 <sup>b</sup>   |            |         | 14.6 <sup>a</sup> /<br>12.2 <sup>b</sup> | -0.27 <sup>a</sup> /<br>-0.26 <sup>b</sup> | 43.8 <sup>a</sup> /61.5 <sup>b</sup> | -2.0 <sup>a</sup> /<br>-2.4 <sup>b</sup> |       |
|                                                                                                                                                                                                                                                                     | CLZ SC 25 mg Q4W ± MTX  | 41                  |                                  | 46.3 <sup>a</sup> /<br>56.1 <sup>b</sup> | 29.3 <sup>a</sup> /<br>34.1 <sup>b</sup> | 17.1 <sup>a</sup> /<br>19.5 <sup>b</sup> |            |         | 12.2 <sup>a</sup> /<br>19.5 <sup>b</sup> | -0.44 <sup>a</sup> /<br>-0.46 <sup>b</sup> | 60.0 <sup>a</sup> /42.9 <sup>b</sup> | -3.3 <sup>a</sup> /<br>-4.7 <sup>b</sup> |       |
|                                                                                                                                                                                                                                                                     | CLZ SC 100 mg Q4W ± MTX | 42                  |                                  | 52.4 <sup>a</sup> /<br>57.1 <sup>b</sup> | 35.7 <sup>a</sup> /<br>35.7 <sup>b</sup> | 14.3 <sup>a</sup> /<br>23.8 <sup>b</sup> |            |         | 16.7 <sup>a</sup> /<br>28.6 <sup>b</sup> | -0.40 <sup>a</sup> /<br>-0.43 <sup>b</sup> | 25.0 <sup>a</sup> /18.2 <sup>b</sup> | -3.0 <sup>a</sup> /<br>-3.4 <sup>b</sup> |       |
|                                                                                                                                                                                                                                                                     | CLZ SC 200 mg Q4W ± MTX | 41                  |                                  | 39.0 <sup>a</sup> /<br>39.0 <sup>b</sup> | 17.1 <sup>a</sup> /<br>24.4 <sup>b</sup> | 4.9 <sup>a</sup> /<br>12.2 <sup>b</sup>  |            |         | 4.9 <sup>a</sup> /<br>12.2 <sup>b</sup>  | -0.26 <sup>a</sup> /<br>-0.34 <sup>b</sup> | 38.5 <sup>a</sup> /33.3 <sup>b</sup> | -2.9 <sup>a</sup> /<br>-3.3 <sup>b</sup> |       |
| DAPSA: Disease Activity Index for Psoriatic Arthritis; MDA: Minimal Disease Activity<br>* patients with dactylitis in those with dactylitis (≥1 tender digit) at baseline<br><sup>a</sup> efficacy outcomes at week 16<br><sup>b</sup> efficacy outcomes at week 24 |                         |                     |                                  |                                          |                                          |                                          |            |         |                                          |                                            |                                      |                                          |       |

## 3.4.2: Axial spondyloarthritis (axSpA)

Table S3.4.2.1: Efficacy outcomes of trials investigating IL-6R/L blockers in axSpA.

| Study                                                                                                                                                                                                                                                                                    | Treatment         | No. of patients (n) | Timepoint (weeks) | ASAS 20 (%) | ASAS 40 (%) | ASAS 5/6 (%) | ASDAS partial rem. (%) | ΔASDAS (%) | ΔBASDAI (%) | ΔBASFI (%) | ΔBASMI (%) | ΔASspi-MRI total score | ΔCRP (mg/dL) |
|------------------------------------------------------------------------------------------------------------------------------------------------------------------------------------------------------------------------------------------------------------------------------------------|-------------------|---------------------|-------------------|-------------|-------------|--------------|------------------------|------------|-------------|------------|------------|------------------------|--------------|
| Sieper 2014 (BUILDER-1) (59)                                                                                                                                                                                                                                                             | Placebo           | 51                  | 12                | 27.5        | 19.6        | 15.7         | 2.0                    |            |             |            |            |                        | -0.17        |
|                                                                                                                                                                                                                                                                                          | TCZ 8 mg/kg Q4W   | 51                  |                   | 37.3        | 11.8        | 25.5         | 0.0                    |            |             |            |            |                        |              |
| Sieper 2015 (ALIGN) (60)                                                                                                                                                                                                                                                                 | Placebo           | 50                  | 12                | 24.0        | 8.0         | 6.0          | 2.0                    | -0.4       | -0.9        |            | -0.2       | -0.5                   | -3.7*        |
|                                                                                                                                                                                                                                                                                          | SAR SC 100 mg Q2W | 49                  |                   | 24.5        | 14.3        | 12.2         | 8.2                    | -0.5       | -0.8        |            | -0.2       | -0.5                   | -1.2*        |
|                                                                                                                                                                                                                                                                                          | SAR SC 150 mg Q2W | 50                  |                   | 30.0        | 16.0        | 10.0         | 2.0                    | -0.8       | -1.1        |            | -0.2       | -0.1                   | -5.8*        |
|                                                                                                                                                                                                                                                                                          | SAR SC 100 mg QW  | 52                  |                   | 19.2        | 5.8         | 13.5         | 1.9                    | -1.1       | -0.4        |            | -0.4       | 0.1                    | -13.5*       |
|                                                                                                                                                                                                                                                                                          | SAR SC 200 mg Q2W | 50                  |                   | 30.0        | 18.0        | 14.0         | 2.0                    | -1.2       | -0.9        |            | -0.1       | -0.3                   | -11.5*       |
|                                                                                                                                                                                                                                                                                          | SAR SC 150 mg QW  | 50                  |                   | 38.0        | 20.0        | 32.0         | 8.0                    | -1.6       | -1.2        |            | -0.2       | 0.3                    | -14.3*       |
| ASAS: Axial SpondyloArthritis international Society; ASDAS: Ankylosing Spondylitis Disease Activity Score; BASDAI: Bath Ankylosing Spondylitis Disease Activity Index; BASFI: Bath Ankylosing Spondylitis Functional Index; BASMI: Bath Ankylosing Spondylitis Metrology Index<br>* mg/L |                   |                     |                   |             |             |              |                        |            |             |            |            |                        |              |

## 3.4.3: Osteoarthritis (OA)

Table S3.4.3.1: Efficacy outcomes of trials investigating IL-6R/L blockers in OA.

| Study                                                                                                                                                                                                                                                                                         | Treatment                                       | No. of patients (n) | Timepoint (weeks)                                               | ΔVAS pain                                                                                | ΔMorning stiffness                                                                         | ΔPJ                                                                                    | ΔSJ                                                                                    | ΔVAS PGA                                                                                  | ΔVAS PhGA                                                                                | ΔFIHOA                                                                                 | ΔCHFS                                                                                |
|-----------------------------------------------------------------------------------------------------------------------------------------------------------------------------------------------------------------------------------------------------------------------------------------------|-------------------------------------------------|---------------------|-----------------------------------------------------------------|------------------------------------------------------------------------------------------|--------------------------------------------------------------------------------------------|----------------------------------------------------------------------------------------|----------------------------------------------------------------------------------------|-------------------------------------------------------------------------------------------|------------------------------------------------------------------------------------------|----------------------------------------------------------------------------------------|--------------------------------------------------------------------------------------|
| Richette 2020 (61)                                                                                                                                                                                                                                                                            | Placebo ± acetaminophen                         | 41                  | 4 <sup>a</sup> /6 <sup>b</sup> /8 <sup>c</sup> /12 <sup>d</sup> | -3.0 <sup>a</sup> /<br>-9.7 <sup>b</sup> /<br>-9.4 <sup>c</sup> /<br>-11.6 <sup>d</sup>  | -11.9 <sup>a</sup> /<br>-19.3 <sup>b</sup> /<br>-17.2 <sup>c</sup> /<br>-19.6 <sup>d</sup> | -0.7 <sup>a</sup> /<br>-2.4 <sup>b</sup> /<br>-1.9 <sup>c</sup> /<br>-1.6 <sup>d</sup> | -0.7 <sup>a</sup> /<br>-0.2 <sup>b</sup> /<br>-0.8 <sup>c</sup> /<br>-1.2 <sup>d</sup> | -5.4 <sup>a</sup> /<br>-10.6 <sup>c</sup> /<br>-10.1 <sup>b</sup> /<br>-12.9 <sup>d</sup> | -4.2 <sup>a</sup> /<br>-7.4 <sup>c</sup> /<br>-8.0 <sup>b</sup> /<br>-12.1 <sup>d</sup>  | 0.3 <sup>a</sup> /<br>0.2 <sup>b</sup> /<br>0.5 <sup>c</sup> /<br>-0.1 <sup>d</sup>    | 0.2 <sup>a</sup> /<br>-0.2 <sup>b</sup> /<br>0.4 <sup>c</sup> /<br>-0.8 <sup>d</sup> |
|                                                                                                                                                                                                                                                                                               | TCZ 8 mg/kg (week 0 and week 4) ± acetaminophen | 42                  |                                                                 | -0.9 <sup>a</sup> /<br>-8.3 <sup>b</sup> /<br>-12.3 <sup>c</sup> /<br>-13.5 <sup>d</sup> | 15.9 <sup>a</sup> /<br>-2.3 <sup>b</sup> /<br>-8.6 <sup>c</sup> /<br>-8.5 <sup>d</sup>     | -0.5 <sup>a</sup> /<br>-2.0 <sup>b</sup> /<br>-3.0 <sup>c</sup> /<br>-2.6 <sup>d</sup> | -0.2 <sup>a</sup> /<br>-1.1 <sup>b</sup> /<br>-1.6 <sup>c</sup> /<br>-1.4 <sup>d</sup> | -1.7 <sup>a</sup> /<br>-10.4 <sup>c</sup> /<br>-8.3 <sup>b</sup> /<br>-13.4 <sup>d</sup>  | -3.7 <sup>a</sup> /<br>-15.0 <sup>c</sup> /<br>-7.3 <sup>b</sup> /<br>-14.2 <sup>d</sup> | 0.4 <sup>a</sup> /<br>-0.04 <sup>b</sup> /<br>-0.3 <sup>c</sup> /<br>-1.0 <sup>d</sup> | 1.1 <sup>a</sup> /<br>0.8 <sup>b</sup> /<br>0.3 <sup>c</sup> /<br>-0.8 <sup>d</sup>  |
| <sup>a</sup> efficacy outcome at week 4<br><sup>b</sup> efficacy outcome at week 6; primary endpoint: ΔVAS pain at week 6: -7.9 (SD 19.4) in TCZ and -9.9 (SD 20.1) in placebo; SD: standard deviation<br><sup>c</sup> efficacy outcome at week 8<br><sup>d</sup> efficacy outcome at week 12 |                                                 |                     |                                                                 |                                                                                          |                                                                                            |                                                                                        |                                                                                        |                                                                                           |                                                                                          |                                                                                        |                                                                                      |

## 3.4.4: Polymyalgia rheumatica (PMR)

Table S3.4.4.1: Efficacy outcomes of trials investigating IL-6R/L blockers in PMR.

| Study                                                                                                                                                                                                                                                | Primary / Secondary outcome                                                                                                                                                                                                                                         | Timepoint (weeks) | Treatment arm                                     | No. of patients (n) | Result                                                                                         | p / 95% CI                                                                                               |
|------------------------------------------------------------------------------------------------------------------------------------------------------------------------------------------------------------------------------------------------------|---------------------------------------------------------------------------------------------------------------------------------------------------------------------------------------------------------------------------------------------------------------------|-------------------|---------------------------------------------------|---------------------|------------------------------------------------------------------------------------------------|----------------------------------------------------------------------------------------------------------|
| Lally 2016 (62)                                                                                                                                                                                                                                      | % pat. with steroid-free remission at 6 months; %relapse at 12 months, mean cumulative prednisone dose (mg), mean duration of prednisone exposure (months)                                                                                                          | 26/52             | TCZ 8mg/kg Q4W for 1 year + rapid GC-12 wks taper | 9 <sup>a</sup>      | 100%; 0%; 1,085.3mg; 3.9                                                                       | PE: % pat. with steroid-free remission at 6 months:<0.0001; 0.03, 0.01, 0.002                            |
|                                                                                                                                                                                                                                                      |                                                                                                                                                                                                                                                                     |                   | Comparator group                                  | 10                  | 0%; 60%; 2,562.0mg; 14.1                                                                       |                                                                                                          |
| Devauchelle-Pensec 2016 (TENOR) (63)                                                                                                                                                                                                                 | % pat. with PMR-AS≤10; %PMR-AS<7;<br><br>PMR-AS, PMR-AS (ESR), median CRP (mg/dl), median ESR (mm/h), patient VAS pain, patient VAS fatigue, patient VAS disease activity, physician VAS disease activity, morning stiffness (minutes), EUL, SF-36: MCS, SF-36: PCS | 12                | TCZ 8 mg/kg week 0, 4 and 8                       | 20                  | 100%; 85%;<br><br>4.5, 4.7, 0.2 mg/dl, 2.00 mm/h, 1.7, 2.1, 2.0, 1.1, 4.0 min, 0.0, 47.7, 40.6 | -<br><br>p Value Week 0 vs week 12: <0.001, <0.001, <0.001, <0.001, <0.001, <0.001, 0.002, 0.058, <0.001 |
| EUL: 0–3 scale for elevation of the upper limb<br>MCS: mental component summary of the SF36<br>PCS: physical component summary of the SF36<br><sup>a</sup> one subject withdrew from study due to mild infusion reaction (after second TCZ infusion) |                                                                                                                                                                                                                                                                     |                   |                                                   |                     |                                                                                                |                                                                                                          |

### 3.4.5: ANCA-associated vasculitis (GPA, MPA)

Table S3.4.5.1: Efficacy outcomes of trials investigating IL-6R/L blockers in ANCA-associated vasculitis.

| Study          | Primary / Secondary outcome | Timepoint (weeks) | Treatment arm | No. of patients (n) | Result | p / 95% CI |
|----------------|-----------------------------|-------------------|---------------|---------------------|--------|------------|
| No study found | -                           | -                 | -             | -                   | -      | -          |



### 3.4.6: Remitting seronegative symmetric synovitis with pitting edema (RS3PE)

Table S3.4.6.1: Efficacy outcomes of trials investigating IL-6R/L blockers in RS3PE.

| <b>Study</b>   | <b>Primary / Secondary outcome</b> | <b>Timepoint (weeks)</b> | <b>Treatment arm</b> | <b>No. of patients (n)</b> | <b>Result</b> | <b>p / 95% CI</b> |
|----------------|------------------------------------|--------------------------|----------------------|----------------------------|---------------|-------------------|
| No study found | -                                  | -                        | -                    | -                          | -             | -                 |

## 3.4.7: Systemic sclerosis associated interstitial lung disease (SSc-ILD)

Table S3.4.7.1: Efficacy outcomes of trials investigating IL-6R/L blockers in SSc-ILD.

| Study                                                                                                                                                                | Primary / Secondary outcome                                                                                                                                                                                                                                                                                                                                                                                                                         | Timepoint (weeks) | Treatment arm | No. of patients (n) | Result                                                           | p / 95% CI                                                                                                          |
|----------------------------------------------------------------------------------------------------------------------------------------------------------------------|-----------------------------------------------------------------------------------------------------------------------------------------------------------------------------------------------------------------------------------------------------------------------------------------------------------------------------------------------------------------------------------------------------------------------------------------------------|-------------------|---------------|---------------------|------------------------------------------------------------------|---------------------------------------------------------------------------------------------------------------------|
| Khanna 2020 (focuSSced) (64)                                                                                                                                         | ΔLSM in mRSS from BL to week 48; ΔLSM in mRSS from BL to week 24, % with improvement in mRSS from BL ≥20%/≥40%/≥60%, HAQ, ACR-CRISS (median); FVC% predicted change from BL (LSM, Intention-to-treat population), FVC% predicted change from BL (LSM, patients with SSc-ILD*), Δ from BL to week 48 in FVC (LSM ml, intention-to-treat population), Δ from BL to week 48 in FVC (LSM ml, SSc-ILD patients*); % pat. ≥15% decline in %DLCO predicted | 48                | Placebo       | 106                 | -4.4; -3.1, 50%/38%/23%, -0.06, 0.3; -4.6, -6.4, -190, -255, 10% | PE: ΔLSM in mRSS from BL to week 48: 0.10; 0.455, 0.0007/0.51/0.33, 0.45, 0.02, 0.0002, 0.0001, 0.0001, <0.0001, NA |
|                                                                                                                                                                      |                                                                                                                                                                                                                                                                                                                                                                                                                                                     |                   | TCZ 162 mg QW | 104                 | -6.1; -3.7, 72%/42%/17%, -0.11, 0.9; -0.4; 0.1, -24, -14, 9%     |                                                                                                                     |
| LSM: least squares mean; BL: baseline; ACR-CRISS: American College of Rheumatology-Combined Response Index in Systemic Sclerosis<br>* placebo: n=68; TCZ-group: n=68 |                                                                                                                                                                                                                                                                                                                                                                                                                                                     |                   |               |                     |                                                                  |                                                                                                                     |

### 3.4.8: Idiopathic inflammatory myopathies (IIM)

Table S3.4.8.1: Efficacy outcomes of trials investigating IL-6R/L blockers in IIM.

| Study                                                                         | Primary / Secondary outcome                                                                                                                                                                                                                                      | Timepoint (weeks) | Treatment arm                                | No. of patients (n) | Result               | p / 95% CI                                                                                                         |
|-------------------------------------------------------------------------------|------------------------------------------------------------------------------------------------------------------------------------------------------------------------------------------------------------------------------------------------------------------|-------------------|----------------------------------------------|---------------------|----------------------|--------------------------------------------------------------------------------------------------------------------|
| NCT02043548 (phase 2, not published) (65)                                     | Mean Total Improvement Scores at Visits 2 Through 7 (during 6-month treatment period) *; time to first Definition of Improvement (DOI); median, days); Δ steroid dose prednisone equivalent from last visit to BL (mg); mean manual muscle test measures (0-150) | 24                | Placebo ± concomitant GC±csDMARD±IVIG        | 18                  | 29.3; 55.5; 0; 137.3 | PE: Mean Total Improvement Scores at Visits 2 Through 7 (during 6-month treatment period) *:0.86; 0.77; 0.40; 0.78 |
|                                                                               |                                                                                                                                                                                                                                                                  |                   | TCZ 8mg/kg Q4W ± concomitant GC±csDMARD±IVIG | 18                  | 26.4; 42.4; 0; 130.7 |                                                                                                                    |
| * total improvement score based on 2016 ACR/EULAR myositis response criteria. |                                                                                                                                                                                                                                                                  |                   |                                              |                     |                      |                                                                                                                    |

## 3.4.9: Systemic lupus erythematosus (SLE)

Table S3.4.9.1: Efficacy outcomes of trials investigating IL-6R/L blockers in SLE.

| Study                                        | Treatment                              | No. of patients (n) | Timepoint (weeks) | SRI response (%) | BICLA response (%) | SRI response (%)* | BICLA response (%)* | Severe BILAG flares (%)** | Mean % of proteinuria reduction from BL to wk 24 | Reduction in proteinuria ≥50% from BL (%) | No eGFR worsening (%) |
|----------------------------------------------|----------------------------------------|---------------------|-------------------|------------------|--------------------|-------------------|---------------------|---------------------------|--------------------------------------------------|-------------------------------------------|-----------------------|
| Wallace 2017 (phase 2, BUTTERFLY) (66)       | Placebo + GC+csDMARDs                  | 45                  | 24                | 40.1             | 25.1               | 27.7              | 19.7                | 11.1                      |                                                  |                                           |                       |
|                                              | PF-04236921 10 mg SC Q8W + GC+csDMARDs | 45                  |                   | 59.9             | 49.7               | 73.1              | 55.7                | 4.7                       |                                                  |                                           |                       |
|                                              | PF-04236921 50 mg SC Q8W + GC+csDMARDs | 47                  |                   | 39.2             | 40.5               | 43.1              | 34.7                | 0.0                       |                                                  |                                           |                       |
| Rovin 2016 (phase 2) (67)                    | Placebo + GC+csDMARDs                  | 4                   | 24                |                  |                    |                   |                     |                           | -73.6                                            | 0.0                                       | 75.0                  |
|                                              | SIR 10 mg/kg IV Q4W + GC+csDMARDs      | 21                  |                   |                  |                    |                   |                     |                           | -37.1                                            | 20.0                                      | 45.0                  |
| NCT02437890 (phase 2, not published) (68)*** | Placebo                                | 62                  | 24                |                  | 46.8               |                   |                     | 12.9                      | 6.17****                                         |                                           |                       |
|                                              | ALX-0061 75 mg Q4W                     | 64                  |                   |                  | 43.8               |                   |                     | 9.4                       | 1.77****                                         |                                           |                       |
|                                              | ALX-0061 150 mg Q4W                    | 62                  |                   |                  | 38.7               |                   |                     | 9.7                       | 1.03****                                         |                                           |                       |
|                                              | ALX-0061 150 mg Q2W                    | 62                  |                   |                  | 38.7               |                   |                     | 11.3                      | -3.02****                                        |                                           |                       |
|                                              | ALX-0061 225 mg Q2W                    | 62                  |                   |                  | 37.1               |                   |                     | 9.7                       | 0.16****                                         |                                           |                       |

SRI: Systemic Lupus Erythematosus Responder Index; BICLA: BILAG-based Composite Lupus Assessment; BL: baseline; eGFR: estimated glomerular filtration rate  
\* summary of SRI and BICLA response at week 24 in enriched population: Placebo (n=33), 10 mg treatment arm (n=30), 50 mg treatment arm (n=38)  
\*\* defined as new BILAG A or two new BILAG B organ domain scores

\*\*\* primary endpoint defined as Modified British Isles Lupus Assessment Group (BILAG)-Based Composite Lupus Assessment (mBICLA) Score  
 \*\*\*\* Mean change From Baseline in Proteinuria at Week 24 and Week 48

### 3.4.10: Primary Sjögren's syndrome (pSS)

Table S3.4.10.1: Efficacy outcomes of trials investigating IL-6R/L blockers in pSS.

| Study                                                                                                                           | Primary / Secondary outcome                                                                                                                                                                                                                                                                                                                                      | Timepoint (weeks) | Treatment arm                             | No. of patients (n) | Result                          | Pr (diff>0)*                      |
|---------------------------------------------------------------------------------------------------------------------------------|------------------------------------------------------------------------------------------------------------------------------------------------------------------------------------------------------------------------------------------------------------------------------------------------------------------------------------------------------------------|-------------------|-------------------------------------------|---------------------|---------------------------------|-----------------------------------|
| Felten 2020 (69)                                                                                                                | Primary endpoint defined by combination of (1) a decrease of at least 3 points in ESSDAI, (2) no new moderate/severe activity in any ESSDAI domain and 3) no worsening in physician's global assessment on a visual numeric scale $\geq 1/10$ ; 3-point decrease in ESSDAI, no new systemic complication, no worsening according to physician; ESSPRI at week 24 | 24                | Placebo $\pm$ GC $\pm$ csDMARDs           | 55                  | 63.6%; 70%, 84%, 84.8%, 6.2     | PE: 0.86; 0.91, 0.79, 0.05, 0.125 |
|                                                                                                                                 |                                                                                                                                                                                                                                                                                                                                                                  |                   | TCZ 8mg/kg IV Q4W $\pm$ GC $\pm$ csDMARDs | 55                  | 52.7%; 57.1%, 77.6%, 95.7%, 5.8 |                                   |
| * proportion difference: 95% credible interval (CrI) and the probability of difference >0 in favour of TCZ group (Pr[Toc >Pla]) |                                                                                                                                                                                                                                                                                                                                                                  |                   |                                           |                     |                                 |                                   |

## 3.4.11: Amyloid A (AA)-Amyloidosis (AAA)

Table S3.4.11.1: Efficacy outcomes of trials investigating IL-6R/L blockers in AAA.

| Study                                                                                                                                                                                                                                                                                                                         | Primary / Secondary outcome                                                                                                                                                                                                                                                                                                                                                                    | Timepoint (weeks)                          | Treatment arm | No. of patients (n) | Result                                                                                                                    | p <sup>a</sup>                            |
|-------------------------------------------------------------------------------------------------------------------------------------------------------------------------------------------------------------------------------------------------------------------------------------------------------------------------------|------------------------------------------------------------------------------------------------------------------------------------------------------------------------------------------------------------------------------------------------------------------------------------------------------------------------------------------------------------------------------------------------|--------------------------------------------|---------------|---------------------|---------------------------------------------------------------------------------------------------------------------------|-------------------------------------------|
| Okuda 2014 (70)                                                                                                                                                                                                                                                                                                               | 1- and 5-year treatment retention rates (Kaplan–Meier method); median $\Delta$ SAA ( $\mu\text{g/ml}$ ); median observation period: TCZ 22.5 months, TNF-i 21.0 months); median $\Delta$ eGFR ( $\text{mL/min/1.73 m}^2$ ); median observation period: TCZ 22.5 months, TNF-I 21.0 months); mean $\Delta$ CDAI (last observation); mean $\Delta$ GC dose ( $\text{mg/day}$ , last observation) | described in “Primary / Secondary outcome” | TCZ           | 22                  | 90.4%/90.4%;<br>219.2 $\rightarrow$ 5.0; 41.6 $\rightarrow$ 50.7;<br>16.04 $\rightarrow$ 7.98; 5.5 $\rightarrow$ 2.7      | 0.0154; 0.0194;<br>0.0062; 0.0201; 0.0057 |
|                                                                                                                                                                                                                                                                                                                               |                                                                                                                                                                                                                                                                                                                                                                                                |                                            | TNF-i         | 32                  | 69.0%/34.3%;<br>143.6 $\rightarrow$ 38.1;<br>76.3 $\rightarrow$ 67.4;<br>19.11 $\rightarrow$ 12.31; 5.0 $\rightarrow$ 4.7 |                                           |
| Okuda 2018 (71)                                                                                                                                                                                                                                                                                                               | %pat. with good response*                                                                                                                                                                                                                                                                                                                                                                      | NA                                         | TCZ           | 66                  | 95.5                                                                                                                      | 0.007                                     |
|                                                                                                                                                                                                                                                                                                                               |                                                                                                                                                                                                                                                                                                                                                                                                |                                            | TNF-i         | 27                  | 74.1                                                                                                                      |                                           |
|                                                                                                                                                                                                                                                                                                                               |                                                                                                                                                                                                                                                                                                                                                                                                |                                            | ABA           | 4                   | 75                                                                                                                        |                                           |
| * variables of survey questionnaire included: age, gender, family history, medical history, underlying diseases, histological evidence for the diagnosis, manifestation at the diagnosis, therapeutic modality and response, laboratory data [CRP, SAA, creatinine, albumin, urinary protein], and echocardiographic results. |                                                                                                                                                                                                                                                                                                                                                                                                |                                            |               |                     |                                                                                                                           |                                           |
| <sup>a</sup> efficacy of TCZ was significantly superior to that of TNF inhibitors                                                                                                                                                                                                                                             |                                                                                                                                                                                                                                                                                                                                                                                                |                                            |               |                     |                                                                                                                           |                                           |

## 3.4.12: Multiple Myeloma (MM)

Table S3.4.12.1: Efficacy outcomes of trials investigating IL-6R/L blockers in MM.

| Study                                                                                                                                                                                                                                                                                                                                            | Treatment                 | No. of patients (n) | Median treatment duration (months) | Overall response (CR or PR) (%) <sup>a</sup> | Complete response (%) | Partial response (%)              | VGPR (%) <sup>b</sup>             | Progressive disease (%) | 100% M-protein response in serum (%) | 100% M-protein response in urine (%) | Median time to first response (months) | Median PFS (months)* | 1-year survival rate (%) |
|--------------------------------------------------------------------------------------------------------------------------------------------------------------------------------------------------------------------------------------------------------------------------------------------------------------------------------------------------|---------------------------|---------------------|------------------------------------|----------------------------------------------|-----------------------|-----------------------------------|-----------------------------------|-------------------------|--------------------------------------|--------------------------------------|----------------------------------------|----------------------|--------------------------|
| San-Miguel 2014 (phase 2) (72)                                                                                                                                                                                                                                                                                                                   | VMP                       | 54                  | 12.9                               | 80                                           | 22                    | 57                                | 51                                | 0                       | 38                                   | 57                                   | 1.4                                    | 17                   | 88                       |
|                                                                                                                                                                                                                                                                                                                                                  | SIL 13 mg/kg IV Q3W + VMP | 52                  | 12.5                               | 88                                           | 27                    | 61                                | 71                                | 0                       | 61                                   | 100                                  | 0.8                                    | 17                   | 88                       |
|                                                                                                                                                                                                                                                                                                                                                  |                           |                     |                                    | ITT population PFS (days) Median             | 1-year PFS rate %     | 1-year PFS rate %; Risk factor <2 | 1-year PFS rate %; Risk factor ≥2 | PFS events, %           |                                      |                                      |                                        |                      |                          |
| Brighton 2019 (phase 2) (73)                                                                                                                                                                                                                                                                                                                     | Placebo                   | 42                  | 29.2                               | 715.0                                        | 74.4                  | 100.0                             | 48.1                              | 42.9                    |                                      |                                      |                                        |                      |                          |
|                                                                                                                                                                                                                                                                                                                                                  | SIL 15 mg/kg IV Q3W       | 43                  |                                    | NE                                           | 84.5                  | 89.3                              | 79.8                              | 32.6                    |                                      |                                      |                                        |                      |                          |
| <p>* PFS: progression-free survival<br/> NE: not estimable<br/> <sup>a</sup> overall response: complete response (CR) or partial response (PR) based on European Group for Blood and Marrow Transplantation (EBMT) criteria<br/> <sup>b</sup> very good partial response (VGPR) based on International Myeloma Working Group (IMWG) criteria</p> |                           |                     |                                    |                                              |                       |                                   |                                   |                         |                                      |                                      |                                        |                      |                          |

### 3.4.13: Refractory relapsing polychondritis

Table S3.4.13.1: Efficacy outcomes of trials investigating IL-6R/L blockers in refractory relapsing polychondritis.

| <b>Study</b>   | <b>Primary / Secondary outcome</b> | <b>Timepoint (weeks)</b> | <b>Treatment arm</b> | <b>No. of patients (n)</b> | <b>Result</b> | <b>p / 95% CI</b> |
|----------------|------------------------------------|--------------------------|----------------------|----------------------------|---------------|-------------------|
| No study found | -                                  | -                        | -                    | -                          | -             | -                 |



### 3.4.14: Cytokine release syndrome CRS (associated with severe SARS-CoV-2 infection, Macrophage activating syndrome)

Table S3.4.14.1: Efficacy outcome of trials investigating IL-6R/L blockers in CRS (associated with severe SARS-CoV-2 infection, Macrophage activating syndrome): Cohort studies I

| Study                                                                                                                                                                                                                                                                                                                                                                                                                                                                                                                                | Treatment                 | No. of patients (n) | Median follow-up without endpoint (days) | Primary outcome (%) <sup>a</sup> | Scale <sup>b</sup> ≤ 3 (%) | Scale 7 (death) (%) | Digestive tract bleeding | Secondary bacterial infection |
|--------------------------------------------------------------------------------------------------------------------------------------------------------------------------------------------------------------------------------------------------------------------------------------------------------------------------------------------------------------------------------------------------------------------------------------------------------------------------------------------------------------------------------------|---------------------------|---------------------|------------------------------------------|----------------------------------|----------------------------|---------------------|--------------------------|-------------------------------|
| Rodriguez-Bano 2020 (SAM-COVID) (74)                                                                                                                                                                                                                                                                                                                                                                                                                                                                                                 | No treatment              | 344                 | 20                                       | 20.1                             | 81.1                       | 11.9                | 0.6                      | 10.3                          |
|                                                                                                                                                                                                                                                                                                                                                                                                                                                                                                                                      | TCZ                       | 88                  | 21                                       | 11.4                             | 90.9                       | 2.3                 | 1.1                      | 12.5                          |
|                                                                                                                                                                                                                                                                                                                                                                                                                                                                                                                                      | GC intermediate-high dose | 117                 | 21                                       | 23.1                             | 78.6                       | 18.8                | 1.4                      | 8.7                           |
|                                                                                                                                                                                                                                                                                                                                                                                                                                                                                                                                      | GC pulse dose             | 78                  | 21                                       | 15.4                             | 83.3                       | 10.3                | 1.4                      | 10.7                          |
|                                                                                                                                                                                                                                                                                                                                                                                                                                                                                                                                      | GC + TCZ                  | 151                 | 20                                       | 26.5                             | 80.8                       | 12.6                | 2.0                      | 12.0                          |
| <sup>a</sup> intubation or death (whichever occurred first)<br><sup>b</sup> seven-point ordinal scale at day 21: 1 not hospitalized; 2 hospitalized without supplemental oxygen; 3 hospitalized with supplemental oxygen; 4 hospitalized and requiring supplemental oxygen with a high nasal flow cannula or non-invasive ventilation; 5 hospitalized and requiring mechanical ventilation; 6 hospitalized and requiring extracorporeal membrane oxygenation (ECMO) or invasive mechanical ventilation with amine support; 7 death). |                           |                     |                                          |                                  |                            |                     |                          |                               |

Table S3.4.14.2: Efficacy outcome of trials investigating IL-6R/L blockers in CRS (associated with severe SARS-CoV-2 infection, Macrophage activating syndrome): Cohort studies II

| Study        | Primary / Secondary outcome | Timepoint (days) | Treatment arm | No. of patients (n) | Result | p/95% CI                     |
|--------------|-----------------------------|------------------|---------------|---------------------|--------|------------------------------|
| Ip 2020 (75) | unadjusted 30-day mortality | 30               | No TCZ        | 413                 | 56%    | HR, 0.76 [95% CI, 0.57–1.00] |
|              |                             |                  | TCZ           | 134                 | 46%    |                              |

Table S3.4.14.3: Efficacy outcome of trials investigating IL-6R/L blockers in CRS (associated with severe SARS-CoV-2 infection, Macrophage activating syndrome): Cohort studies III

| Study                                                                                                 | Treatment           | No. of patients (n) | Median Follow-up (days) | Mechanical ventilation (%) | Deaths after mechanical ventilation (%) | Death (%) | Cumulative probability of mechanical ventilation or death at day 14 |
|-------------------------------------------------------------------------------------------------------|---------------------|---------------------|-------------------------|----------------------------|-----------------------------------------|-----------|---------------------------------------------------------------------|
| Guaraldi/Meschiari 2020 (TESEO) (76):<br><i>Characteristics of patients from all centers combined</i> | Standard care       | 365                 | 8                       | 16                         | 25                                      | 20        | 36.5                                                                |
|                                                                                                       | TCZ + Standard care | 179                 | 12                      | 18                         | 15                                      | 7         | 22.6                                                                |

Table S3.4.14.4: Efficacy outcome of trials investigating IL-6R/L blockers in CRS (associated with severe SARS-CoV-2 infection, Macrophage activating syndrome): Cohort studies IV

| Study              | Primary / Secondary outcome                                                                                                                 | Median follow-up (days) | Treatment arm | No. of patients (n) | Result   | p/95% CI                                                                                                                         |
|--------------------|---------------------------------------------------------------------------------------------------------------------------------------------|-------------------------|---------------|---------------------|----------|----------------------------------------------------------------------------------------------------------------------------------|
| Biran/Ip 2020 (77) | median overall survival from time of admission; % death; mechanical ventilation (TCZ yes vs no); hospital-related mortality (TCZ yes vs no) | 22                      | No TCZ        | 420                 | 19; 61%; | HR 0.71, (CI 0.56–0.89)<br>log-rank p=0.0027;<br><br>NR<br>HR 0.63 (CI 0.46–0.85)<br>p=0.0029<br>HR 0.64 (0.47–0.87)<br>p=0.0040 |
|                    |                                                                                                                                             |                         | TCZ           | 210                 | 23; 49%; |                                                                                                                                  |

Table S3.4.14.5: Efficacy outcome of trials investigating IL-6R/L blockers in CRS (associated with severe SARS-CoV-2 infection, Macrophage activating syndrome): Cohort studies V

| Study                                                                                                                                                                                                                                                                                                                                                                                                                                                                                                                                                                                                                                    | Primary / Secondary outcome                                   | Median follow-up (days) | Treatment arm | No. of patients (n) | Result       | Adjusted HR* (95% CI)                                           |
|------------------------------------------------------------------------------------------------------------------------------------------------------------------------------------------------------------------------------------------------------------------------------------------------------------------------------------------------------------------------------------------------------------------------------------------------------------------------------------------------------------------------------------------------------------------------------------------------------------------------------------------|---------------------------------------------------------------|-------------------------|---------------|---------------------|--------------|-----------------------------------------------------------------|
| Gupta 2020 (STOP-COVID) (78)                                                                                                                                                                                                                                                                                                                                                                                                                                                                                                                                                                                                             | primary analysis: death (%)<br>estimated 30-day mortality (%) | 27                      | No TCZ*       | 3491                | 40.6<br>37.1 | 0.71 (0.56-0.92)<br>risk difference, 9.6%<br>(95% CI: 3.1,16.0) |
|                                                                                                                                                                                                                                                                                                                                                                                                                                                                                                                                                                                                                                          |                                                               |                         | TCZ IV/SC*    | 433                 | 28.9<br>27.5 |                                                                 |
| * adjusted for: age, sex, race, ethnicity, BMI, hypertension, diabetes, coronary artery disease, congestive heart failure, current tobacco use, active cancer, home medications (statin, angiotensin-converting enzyme inhibitor, angiotensin 2 receptor blocker), days from symptom onset to (ICU) admission, severity-of-illness covariates assessed on ICU admission (fever, renal/liver components of SOFAscore, PaO2/FiO2 ratio, # vasopressors received, white blood cell count, and inflammation (assessed by CRP, IL-6, and ferritin), and therapies received on ICU admission (HCQ, AZI, GCs, therapeutic anticoagulants, etc.) |                                                               |                         |               |                     |              |                                                                 |

Table S3.4.14.6: Efficacy outcome of trials investigating IL-6R/L blockers in CRS (associated with severe SARS-CoV-2 infection, Macrophage activating syndrome): Cohort studies VI

| Study                 | Primary / Secondary outcome                                                                                                                                                                                                                                                                                                                                                                              | Timepoint (days) | Treatment arm                    | No. of patients (n) | Result                                                 | p/95% CI                                                                                              |
|-----------------------|----------------------------------------------------------------------------------------------------------------------------------------------------------------------------------------------------------------------------------------------------------------------------------------------------------------------------------------------------------------------------------------------------------|------------------|----------------------------------|---------------------|--------------------------------------------------------|-------------------------------------------------------------------------------------------------------|
| Della-Torre 2020 (79) | % clinical improvement; time to clinical improvement (days); % death; time to death (days); % live discharge; time to discharge (days); % mechanical ventilation; time to mechanical ventilation (days); % fever resolution; time to fever resolution (days); % CRP normalisation; time to CRP normalisation (days); median time to clinical improvement in patients with lung consolidation <17% (days) | 28               | Standard of care                 | 28                  | 64; 19; 18; 4; 60; 13; 25; 0.99; 3; 100; 4; 61; 12; 24 | % clinical improvement: 0.99; 0.89; 0.42; 0.006; 0.99; 0.35; 0.52; 0.99; <0.0001; 0.06; <0.0001; 0.01 |
|                       |                                                                                                                                                                                                                                                                                                                                                                                                          |                  | SAR IV 400 mg + Standard of care | 28                  | 60; 18; 7; 19; 60; 12; 21; 5; 100; 1; 86; 6; 10        |                                                                                                       |

Table S3.4.14.7: Efficacy outcomes of trials investigating IL-6R/L blockers in CRS (associated with severe SARS-CoV-2 infection, Macrophage activating syndrome): Historically controlled comparison

| Study                                                                                              | Primary / Secondary outcome                                                                                                                                                                                                                                                                                                                         | Timepoint (days)                           | Treatment arm                                               | No. of patients (n) | Result                                   | p/95% CI                                                                                                           |
|----------------------------------------------------------------------------------------------------|-----------------------------------------------------------------------------------------------------------------------------------------------------------------------------------------------------------------------------------------------------------------------------------------------------------------------------------------------------|--------------------------------------------|-------------------------------------------------------------|---------------------|------------------------------------------|--------------------------------------------------------------------------------------------------------------------|
| Ramiro (CHIC study) 2020 (80)                                                                      | Clinical improvement (2 points) in WHO score (n); hospital mortality (n); mechanical ventilation (n); Clinical improvement (1 point) in WHO score (n); % WHO score 2 at day 7 (no hospitalization); % WHO score 2 at day 14; duration of mechanical ventilation in survivors (days); duration of hospitalisation in survivors and discharged (days) | described in "Primary / Secondary outcome" | Control group                                               | 86                  | 44; 41; 24; 45; 11; 24; 18.8; 15.9       | Clinical improvement (2 points) in WHO score (n): 0.0025; 0.0004; 0.0003; 0.0003; <0.0001; <0.0001; 0.5809; 0.0196 |
|                                                                                                    |                                                                                                                                                                                                                                                                                                                                                     |                                            | Treated group (TCZ 37/86;43%)                               | 86                  | 64; 14; 10; 69; 21; 58; 16.3; 10.8       |                                                                                                                    |
|                                                                                                    |                                                                                                                                                                                                                                                                                                                                                     |                                            | <b>Univariable analysis<br/>HR /coefficient<br/>(95%CI)</b> |                     |                                          |                                                                                                                    |
| Clinical improvement (2 points) in WHO score; hospital mortality; mechanical ventilation; clinical |                                                                                                                                                                                                                                                                                                                                                     | Effect of treatment versus control         |                                                             |                     | 1.79 (1.20, 2.67);<br>0.35 (0.19, 0.65); |                                                                                                                    |

|  |                                                                                                                                                                 |  |                                                                                                                 |
|--|-----------------------------------------------------------------------------------------------------------------------------------------------------------------|--|-----------------------------------------------------------------------------------------------------------------|
|  | improvement (1 point) in WHO score; independence from oxygen therapy; duration of mechanical ventilation in survivors; duration of hospitalisation in survivors |  | 0.29 (0.14, 0.60);<br>1.95 (1.33, 2.87);<br>1.80 (1.19, 2.71);<br>-2.57 (-12.08, 6.93);<br>-5.23 (-8.99, -1.46) |
|--|-----------------------------------------------------------------------------------------------------------------------------------------------------------------|--|-----------------------------------------------------------------------------------------------------------------|

Table S3.4.14.8: Efficacy outcomes of trials investigating IL-6R/L blockers in CRS (associated with severe SARS-CoV-2 infection, Macrophage activating syndrome): RCTs

| Study                                  | Primary / Secondary outcome                                                                                                                                                                                                                                                                   | Timepoint (days) | Treatment arm   | No. of patients (n) | Result                                             | p/95% CI                                                                                                                                                    |
|----------------------------------------|-----------------------------------------------------------------------------------------------------------------------------------------------------------------------------------------------------------------------------------------------------------------------------------------------|------------------|-----------------|---------------------|----------------------------------------------------|-------------------------------------------------------------------------------------------------------------------------------------------------------------|
| Hermine 2020 (CORIMUNO-TOCI 1) (81)    | patients (n) with scores > 5 on WHO-CPS on day 4*; survival without need of ventilation including noninvasive ventilation at day 14 (primary outcome by day 14, cumulative incidence)**; mechanical ventilation or death by day 14***; survival day 14 (%;95% CI); survival day 28 (%;95% CI) | 4/14/28          | Usual care (UC) | 67                  | 19 (28%); 36%; 27%; 91% (84 to 98); 88% (80 to 96) | * median posterior absolute risk difference (ARD) -9.0%; 90% CI -21.0 to 3.1; difference: **-.12 (-28 to 4), HR 0.58 (90% CrI, 0.33-1.00); ***-9 (-24 to 5) |
|                                        |                                                                                                                                                                                                                                                                                               |                  | TCZ + UC        | 63                  | 12 (19%); 24%; 17%; 89% (81 to 97); 89% (81 to 97) |                                                                                                                                                             |
| Salvarani 2020 (RCT-TCZ-COVID-19) (82) | PE: clinical worsening within 14 days <sup>a</sup> ; overall events at 14 d: admissions to ICU, deaths,                                                                                                                                                                                       | 14/30            | Standard care   | 66                  | 27.0%; 7.9%, 1.6%, 57.1%, 7.9%, 1.6%, 92.1%        | Relative ratio 1.05 (0.59,1.86) p=0.87; 1.26 (0.41,3.91),                                                                                                   |

|                                                       |                                                                                                                                                                                                                                                                                                                                                                                                                                                                                                                                                                                    |       |                         |     |                                               |                                                                                          |
|-------------------------------------------------------|------------------------------------------------------------------------------------------------------------------------------------------------------------------------------------------------------------------------------------------------------------------------------------------------------------------------------------------------------------------------------------------------------------------------------------------------------------------------------------------------------------------------------------------------------------------------------------|-------|-------------------------|-----|-----------------------------------------------|------------------------------------------------------------------------------------------|
|                                                       | discharges; overall events at 30 d: admissions to ICU, deaths, discharges                                                                                                                                                                                                                                                                                                                                                                                                                                                                                                          |       | Early TCZ               | 60  | 28.3%; 10.0%, 1.7%, 56.7%, 10.0%, 3.3%, 90.0% | 1.05 (0.07,16.4), 0.99 (0.73,1.35), 1.26 (0.41,3.91), 2.10 (0.20,22.6), 0.98 (0.87,1.09) |
| Stone 2020 (phase 3, BACC Bay Tocilizumab Trial) (83) | Primary outcome: mechanical ventilation or death at day 14 (%;95%CI), mechanical ventilation or death day 28 (%;95%CI);<br><br>clinical worsening on ordinal scale <sup>b</sup> at day 14 (%;95%CI), clinical worsening on ordinal scale day 28 (%;95%CI)<br><br>discontinuation of supplemental oxygen among patients receiving it at baseline at day 14 (%;95%CI), discontinuation of supplemental oxygen among patients receiving it at baseline at day 28 (%;95%CI)<br><br>median duration of receipt of supplemental oxygen (days), median duration of mechanical ventilation | 14/28 | Placebo + Standard care | 82  | 10.0 (5.1,18.9), 12.5 (6.9,22.0)              | PE: HR 0.83 (0.38,1.81) p=0.64                                                           |
|                                                       |                                                                                                                                                                                                                                                                                                                                                                                                                                                                                                                                                                                    |       |                         |     | 14.9 (8.7,24.7), 17.4 (10.7,27.7)             | HR 1.11 (0.59,2.10) p=0.73                                                               |
|                                                       |                                                                                                                                                                                                                                                                                                                                                                                                                                                                                                                                                                                    |       |                         |     | 78.8 (68.3,87.7), 84.9 (75.2,92.2)            | HR 0.94 (0.67,1.30) p=0.69                                                               |
|                                                       |                                                                                                                                                                                                                                                                                                                                                                                                                                                                                                                                                                                    |       |                         |     | 3.9, 27.9                                     | HR 0.97 (0.50,1.88)                                                                      |
|                                                       |                                                                                                                                                                                                                                                                                                                                                                                                                                                                                                                                                                                    |       | TCZ + Standard care     | 161 | 9.9 (6.2,15.7), 10.6 (6.7,16.6)               |                                                                                          |
|                                                       |                                                                                                                                                                                                                                                                                                                                                                                                                                                                                                                                                                                    |       |                         |     | 18.0 (12.9,24.9), 19.3 (14.0,26.2)            |                                                                                          |
|                                                       |                                                                                                                                                                                                                                                                                                                                                                                                                                                                                                                                                                                    |       |                         |     | 75.4 (67.9,82.2), 82.6 (75.9,88.4)            |                                                                                          |



|                                                                                                                                                                                                                                                               |                                                                     |  |                         |     |                          |                                         |
|---------------------------------------------------------------------------------------------------------------------------------------------------------------------------------------------------------------------------------------------------------------|---------------------------------------------------------------------|--|-------------------------|-----|--------------------------|-----------------------------------------|
|                                                                                                                                                                                                                                                               |                                                                     |  |                         |     | 4.0, 15.0                |                                         |
|                                                                                                                                                                                                                                                               | admission to ICU or death (days)                                    |  |                         |     | 15.9                     |                                         |
| Salama 2020 (phase 3, EMPACTA) (84)                                                                                                                                                                                                                           | Primary outcome: mechanical ventilation or death (%;95% CI)         |  | Placebo + Standard care | 128 | 19.3 (13.3,27.4)         | HR 0.56 (0.33,0.97)<br>p=0.04           |
|                                                                                                                                                                                                                                                               |                                                                     |  |                         |     |                          |                                         |
|                                                                                                                                                                                                                                                               | median time to hospital discharge or readiness for discharge (days) |  |                         |     | 7.0                      | HR 1.16 (0.91,1.48)                     |
|                                                                                                                                                                                                                                                               | median time to improvement in clinical status (days) <sup>c</sup>   |  |                         |     | NE                       | HR 1.15 (0.90,1.48)                     |
|                                                                                                                                                                                                                                                               | median time to clinical failure (days)                              |  |                         |     | 11 (8.6%; CI 4.9,14.7)   | HR 0.55 (0.33, 0.93)                    |
|                                                                                                                                                                                                                                                               | death no. (%;95% CI)                                                |  | TCZ + Standard care     | 249 | 12.0 (8.5,16.9)          | weighted difference:<br>2.0 (-5.2, 7.8) |
|                                                                                                                                                                                                                                                               |                                                                     |  |                         |     | 6.0                      |                                         |
|                                                                                                                                                                                                                                                               |                                                                     |  |                         |     | 6.0                      |                                         |
|                                                                                                                                                                                                                                                               |                                                                     |  |                         |     | NE                       |                                         |
|                                                                                                                                                                                                                                                               |                                                                     |  |                         |     | 26 (10.4%; CI 7.2, 14.9) |                                         |
| NE: not estimated                                                                                                                                                                                                                                             |                                                                     |  |                         |     |                          |                                         |
| <sup>a</sup> primary end point: defined by occurrence of 1 of the following events, whichever occurred first: a) admission to ICU with mechanical ventilation; b) death; c) paO <sub>2</sub> /FIO <sub>2</sub> ratio <150 mmHg.                               |                                                                     |  |                         |     |                          |                                         |
| <sup>b</sup> worsening defined as increase in score on the ordinal clinical improvement scale by at least 1 point among patients receiving supplemental oxygen at baseline or at least 2 points among patients not receiving supplemental oxygen at baseline. |                                                                     |  |                         |     |                          |                                         |
| <sup>c</sup> clinical status was determined with the use of the seven-category ordinal scale                                                                                                                                                                  |                                                                     |  |                         |     |                          |                                         |

### 3.4.15: Tumor necrosis factor receptor-associated periodic fever syndrome (TRAPS)

Table S3.4.15.1: Efficacy outcomes of trials investigating IL-6R/L blockers in TRAPS.

| <b>Study</b>   | <b>Treatment</b> | <b>Study population</b> | <b>No. of patients (n)</b> | <b>Mean age (years)</b> | <b>Mean disease duration (years)</b> | <b>CRP (mg/dL)</b> | <b>ESR (mm/h)</b> |
|----------------|------------------|-------------------------|----------------------------|-------------------------|--------------------------------------|--------------------|-------------------|
| No study found | -                | -                       | -                          | -                       | -                                    | -                  | -                 |

### 3.4.16: Chronic infantile neurological cutaneous and articular syndrome (CINCA)

Table S3.4.16.1: Efficacy outcomes of trials investigating IL-6R/L blockers in CINCA.

| <b>Study</b>   | <b>Treatment</b> | <b>Study population</b> | <b>No. of patients (n)</b> | <b>Mean age (years)</b> | <b>Mean disease duration (years)</b> | <b>CRP (mg/dL)</b> | <b>ESR (mm/h)</b> |
|----------------|------------------|-------------------------|----------------------------|-------------------------|--------------------------------------|--------------------|-------------------|
| No study found | -                | -                       | -                          | -                       | -                                    | -                  | -                 |

## 3.4.17: Late antibody-mediated kidney transplant rejection (ABMR)

Table S3.4.17.1: Efficacy outcomes of trials investigating IL-6R/L blockers in ABMR.

| Study                                      | Efficacy outcomes                                                                                                                                                                                                                                                                                     | Timepoint (weeks)                | Treatment arm                                                                              | No. of patients (n) | Result                                                                                                         | p/95% CI                                                                                                                                           |
|--------------------------------------------|-------------------------------------------------------------------------------------------------------------------------------------------------------------------------------------------------------------------------------------------------------------------------------------------------------|----------------------------------|--------------------------------------------------------------------------------------------|---------------------|----------------------------------------------------------------------------------------------------------------|----------------------------------------------------------------------------------------------------------------------------------------------------|
| Doberer 2020 (phase 2) (85)                | <i>HLA Antibody and Ig levels:</i><br>DSA MFI mean fluorescence intensity (MFI) week 12/52<br><br><i>Evolution of Rejection:</i><br>-51-week-biopsy decrease in molecular ABMR/"all rejection" scores<br><br>-T cell-mediated rejection scores<br><br><i>Clinical outcomes:</i><br>mean slope of eGFR | 12 <sup>a</sup> /52 <sup>b</sup> | Placebo + calcineurin- or mTOR inhibitor-based (triple) immunosuppressive therapy          | 10                  | 103% <sup>a</sup><br><br>-2.43 (95% CI: -3.4, -1.46) <sup>a</sup><br>-0.64 (95% CI: -1.13, -0.14) <sup>b</sup> | p=0.035 <sup>a</sup> ; p=0.001 <sup>b</sup><br><br>p=0.020 <sup>b</sup> /<br>p=0.037 <sup>b</sup><br><br>p=0.97 <sup>b</sup> / p=0.93 <sup>b</sup> |
|                                            |                                                                                                                                                                                                                                                                                                       |                                  | CLZ SC 25 mg Q4W + calcineurin- or mTOR inhibitor-based (triple) immunosuppressive therapy | 10                  | 77% <sup>a</sup><br><br>-0.96 (95% CI: -1.96, 0.03) <sup>a</sup><br>-0.29 (95% CI: -0.85, 0.26) <sup>b</sup>   | p=0.04 <sup>a</sup><br><br>p=0.37 <sup>b</sup>                                                                                                     |
| <sup>a</sup> part A<br><sup>b</sup> part B |                                                                                                                                                                                                                                                                                                       |                                  |                                                                                            |                     |                                                                                                                |                                                                                                                                                    |

## Section 4: Characteristics of articles and abstracts included: Safety aspects of interleukin-6 pathway inhibition

### 4.1. Cardiovascular events

#### 4.1.1: Composite Outcome (MACE): Comparison between IL-6R/L blockers and different bDMARDs (observational studies/randomized controlled trials)

Table S4.1.1.1: Baseline characteristics of observational studies investigating IL-6R/L blockers regarding MACE (major adverse cardiac events).

| Study         | Registry                                                                           | Inclusion criteria                                                                                       | Exclusion criteria                                                                                                                                                                                                                                                                                                                                                                                           |
|---------------|------------------------------------------------------------------------------------|----------------------------------------------------------------------------------------------------------|--------------------------------------------------------------------------------------------------------------------------------------------------------------------------------------------------------------------------------------------------------------------------------------------------------------------------------------------------------------------------------------------------------------|
| Kim 2017 (86) | US health care claims databases: Medicare, IMS PharMetrics Plus, Truven MarketScan | RA (ICD9 codes) patients, ≥ 18 years, starting TCZ or TNFi after failure of at least 1 bDMARD or tsDMARD | Nursing home residents, patients with HIV/AIDS, malignancy other than NMSC, end-stage renal disease, patients undergone dialysis or renal transplant prior index date; patients who received RTX, patients with hospitalizations for MI, stroke, ACS, or heart failure in the 90 days prior index date                                                                                                       |
| Kim 2018 (87) |                                                                                    |                                                                                                          |                                                                                                                                                                                                                                                                                                                                                                                                              |
| Xie 2019 (88) | US health care claims databases: Medicare, MarketScan                              | RA (ICD9 codes) patients, initiated at least 1 bDMARD for RA                                             | ICD9-CM diagnosis code(s) for other autoimmune/inflammatory diseases, including inflammatory bowel disease, psoriatic arthritis, psoriasis, or ankylosing spondylitis, to ensure that biologics were used to treat RA; 2) had any ICD-9-CM diagnosis code for past myocardial infarction (MI), stroke, ICD-9 procedure code or current procedural terminology code for percutaneous coronary intervention or |

|  |  |  |                                                                                                                                    |
|--|--|--|------------------------------------------------------------------------------------------------------------------------------------|
|  |  |  | coronary artery bypass grafting; history of malignancy (except non-melanoma skin cancer), HIV infection, or organ transplantation. |
|--|--|--|------------------------------------------------------------------------------------------------------------------------------------|

Table S4.1.1.2: Risk of bias analysis (Newcastle-Ottawa Scale [NOS] for Cohort studies)

| Study         | Representativeness of exposed cohort | Selection of non-exposed cohort | Ascertainment of exposure | Outcome not presented at start | Comparability of cohort | Assessment of outcome | Follow-up length | Adequacy of follow-up | Summary |
|---------------|--------------------------------------|---------------------------------|---------------------------|--------------------------------|-------------------------|-----------------------|------------------|-----------------------|---------|
| Kim 2017 (86) | Low                                  | Low                             | High                      | Low                            | Low                     | High                  | Low              | Low                   | High    |
| Kim 2018 (87) | Low                                  | Low                             | High                      | Low                            | Low                     | High                  | Low              | Low                   | High    |
| Xie 2019 (88) | Low                                  | Low                             | High                      | Low                            | Low                     | High                  | Low              | Low                   | High    |

Table S4.1.1.3: Safety outcomes of observational studies regarding MACE.

| Study         | Treatment group |           | N patients | N events | Incidence rate (95% CI)  | age/gender aHR (I vs C) | aHR (I vs C)      | Adjusted for                                                                                                                                                                                                                                                                                                                                                                                                                                                                                                                                                  |
|---------------|-----------------|-----------|------------|----------|--------------------------|-------------------------|-------------------|---------------------------------------------------------------------------------------------------------------------------------------------------------------------------------------------------------------------------------------------------------------------------------------------------------------------------------------------------------------------------------------------------------------------------------------------------------------------------------------------------------------------------------------------------------------|
| Kim 2017 (86) | Combined TCZ    |           | 9,218      | 36       | 0.52/100PY (0.37; 0.71)  | NR                      | 0.84 (0.56; 1.26) | demographics (age, sex, region, race/ethnicity [only available in the Medicare data]), prior DMARD use, cardiovascular comorbidities, other chronic diseases, cardiovascular medications, other long-term medications, and markers of health care utilization intensity                                                                                                                                                                                                                                                                                       |
|               | Combined TNF-i  |           | 18,810     | 89       | 0.59/100PY (0.47; 0.72)  | NR                      | REF               |                                                                                                                                                                                                                                                                                                                                                                                                                                                                                                                                                               |
| Kim 2018 (87) | Combined TCZ    |           | 6,237      | 32       | 0.70/100PY (0.49; 0.97)  | NR                      | 0.82 (0.55; 1.22) |                                                                                                                                                                                                                                                                                                                                                                                                                                                                                                                                                               |
|               | Combined ABA    |           | 14,685     | 112      | 0.96/100PY (0.79; 1.15)  | NR                      | REF               |                                                                                                                                                                                                                                                                                                                                                                                                                                                                                                                                                               |
| Xie 2019 (88) | Medicare        | TCZ       | 7,369      | 104      | 12.9/1000 PY (10.7;15.7) | NR                      | REF               | demographic characteristics (age, sex), co-morbidities (history of CVD, heart failure, atrial fibrillation, abdominal aortic aneurism, peripheral arterial disease, diabetes mellitus, hyperlipidemia, hypertension, obesity, chronic kidney disease, chronic obstructive pulmonary disease, fibromyalgia, any hospitalized infection), health care utilization (any hospitalization, number of physician visits), drug use (methotrexate, nonsteroidal antiinflammatory drugs [NSAIDs], statin potency, other lipid-lowering drug use at baseline, number of |
|               |                 | all TNF-i | 6,895      | 600      | 15.0/1000 PY (13.9;16.3) | NR                      | 1.27 (1.02;1.59)  |                                                                                                                                                                                                                                                                                                                                                                                                                                                                                                                                                               |
|               |                 | ABA       | 11,979     | 199      | 13.7/1000 PY (11.9;15.7) | NR                      | 1.01 (0.79;1.28)  |                                                                                                                                                                                                                                                                                                                                                                                                                                                                                                                                                               |
|               |                 | RTX       | 5,472      | 105      | 16.6/1000 PY (13.7;20.1) | NR                      | 1.16 (0.89;1.53)  |                                                                                                                                                                                                                                                                                                                                                                                                                                                                                                                                                               |
|               | MarketScan      | TCZ       | 4,523      | 21       | 5.2/1000 PY (3.4;7.9)    | NR                      | REF               |                                                                                                                                                                                                                                                                                                                                                                                                                                                                                                                                                               |
|               |                 | all TNF-i | 40,153     | 222      | 5.8 (5.1;6.6)            | NR                      | 1.29 (0.81;2.05)  |                                                                                                                                                                                                                                                                                                                                                                                                                                                                                                                                                               |
|               |                 | ABA       | 8,105      | 67       | 8.7 (6.9;11.1)           | NR                      | 1.60 (0.98; 2.61) |                                                                                                                                                                                                                                                                                                                                                                                                                                                                                                                                                               |

|                                                                                                                                |  |     |       |    |                    |    |                   |                                                                                                                                 |
|--------------------------------------------------------------------------------------------------------------------------------|--|-----|-------|----|--------------------|----|-------------------|---------------------------------------------------------------------------------------------------------------------------------|
|                                                                                                                                |  | RTX | 2,997 | 35 | 11.0<br>(7.9;15.3) | NR | 1.69 (0.98; 2.90) | biologics used prior to initiation of treatment, and oral steroid dose in the 6 months before initiation of treatment), smoking |
| I: intervention; C: control; aHR: adjusted hazard ratio; HR: hazard ratio; REF: reference; PY: patient years; NR: not reported |  |     |       |    |                    |    |                   |                                                                                                                                 |

Table S4.1.1.4: Baseline characteristics of RCTs investigating IL-6R/L blockers regarding MACE (major adverse cardiac events)

| Study                      | Treatment                  | Target        | Population          |
|----------------------------|----------------------------|---------------|---------------------|
| Giles 2020 (ENTRACTE) (89) | Tocilizumab vs. Etanercept | IL-6R vs. TNF | csDMARD-IR; TNFi-IR |

Table S4.1.1.5: Risk of bias analysis (Cochrane Risk of Bias Tool for RCTs)

| Study                      | Random sequence generation | Allocation concealment | Blinding of participants and personnel | Blinding of outcome assessment | Incomplete outcome data | Selective reporting | Other sources of bias | Summary | Comment    |
|----------------------------|----------------------------|------------------------|----------------------------------------|--------------------------------|-------------------------|---------------------|-----------------------|---------|------------|
| Giles 2020 (ENTRACTE) (89) | Low                        | Low                    | High                                   | Unclear                        | Low                     | Low                 | Low                   | High    | Open label |



Table S4.1.1.6: Safety outcomes of RCTs regarding MACE.

| Study                      | Treatment group | N patients | N events | Incidence rate (95% CI) | age/gender aHR (I vs C) | HR               | Adjusted for                                                                               |
|----------------------------|-----------------|------------|----------|-------------------------|-------------------------|------------------|--------------------------------------------------------------------------------------------|
| Giles 2020 (ENTRACTE) (89) | TCZ             | 1,538      | 83       | 1.82/100 PY (1.46;2.24) | NR                      | 1.05 (0.77;1.43) | stratified by previous exposure to TNF-i therapy and history of cardiovascular (CV) events |
|                            | ETN             | 1,542      | 78       | 1.70/100 PY (1.35;2.10) | NR                      | REF              |                                                                                            |

#### 4.1.2: Myocardial infarction: Comparison between IL-6R/L blockers and different bDMARDs (observational studies/randomized controlled trials)

Table S4.1.2.1: Baseline characteristics of observational studies investigating IL-6R/L blockers regarding myocardial infarction.

| Study              | Registry                                                                           | Inclusion criteria                                                                                                       | Exclusion criteria                                                                                                                                                                                                                                                                                     |
|--------------------|------------------------------------------------------------------------------------|--------------------------------------------------------------------------------------------------------------------------|--------------------------------------------------------------------------------------------------------------------------------------------------------------------------------------------------------------------------------------------------------------------------------------------------------|
| Kim 2017 (86)      | US health care claims databases: Medicare, IMS PharMetrics Plus, Truven MarketScan | RA (ICD9 codes) patients, ≥ 18 years, starting TCZ or TNFi after failure of at least 1 bDMARD or tsDMARD                 | Nursing home residents, patients with HIV/AIDS, malignancy other than NMSC, end-stage renal disease, patients undergone dialysis or renal transplant prior index date; patients who received RTX, patients with hospitalizations for MI, stroke, ACS, or heart failure in the 90 days prior index date |
| Kim 2018 (87)      |                                                                                    |                                                                                                                          |                                                                                                                                                                                                                                                                                                        |
| Zhang 2016 (90)    | US health care claims database: Medicare                                           | RA (ICD codes); initiated an anti-TNF (ADA, certolizumab, ETN, GOL, infliximab) or any non-TNF biologics (ABA, RTX, TCZ) | History of coronary heart disease                                                                                                                                                                                                                                                                      |
| Generali 2018 (91) | Administrative healthcare database Italy                                           | RA (ICD9 codes), patients starting treatment with TCZ or ETN for the first time                                          | none                                                                                                                                                                                                                                                                                                   |
| Lukas 2020 (92)    | REGATE (French)                                                                    | RA patients treated with TCZ                                                                                             | none                                                                                                                                                                                                                                                                                                   |

Table S4.1.2.2: Risk of bias analysis (Newcastle-Ottawa Scale [NOS] for Cohort studies)

| Study              | Representativeness of exposed cohort | Selection of non-exposed cohort | Ascertainment of exposure | Outcome not presented at start | Comparability of cohort | Assessment of outcome | Follow-up length | Adequacy of follow-up | Summary |
|--------------------|--------------------------------------|---------------------------------|---------------------------|--------------------------------|-------------------------|-----------------------|------------------|-----------------------|---------|
| Zhang 2016 (90)    | Low                                  | Low                             | High                      | Low                            | Low                     | High                  | Low              | Low                   | High    |
| Generali 2018 (91) | Low                                  | Low                             | High                      | Low                            | Low                     | High                  | Low              | Low                   | High    |
| Lukas 2020 (92)    | Low                                  | High                            | Low                       | Low                            | Low                     | Low                   | Low              | Low                   | High    |

Table S4.1.2.3: Safety outcomes of observational studies regarding myocardial infarction.

| Study         | Treatment group | N patients | N events | Incidence rate (95% CI)  | age/gender aHR (I vs C) | aHR (I vs C)     | Adjusted for                                                                                                                                                                                                                                                            |
|---------------|-----------------|------------|----------|--------------------------|-------------------------|------------------|-------------------------------------------------------------------------------------------------------------------------------------------------------------------------------------------------------------------------------------------------------------------------|
| Kim 2017 (86) | Combined TCZ    | 9,218      | NR       | NR                       | NR                      | 0.70 (0.37;1.34) | demographics (age, sex, region, race/ethnicity [only available in the Medicare data]), prior DMARD use, cardiovascular comorbidities, other chronic diseases, cardiovascular medications, other long-term medications, and markers of health care utilization intensity |
|               | Combined TNF-i  | 18,810     | 41       | 0.27/100 PY (0.20; 0.36) | NR                      | REF              |                                                                                                                                                                                                                                                                         |
| Kim 2018 (87) | Combined TCZ    | 6,237      | NR       | NR                       | NR                      | 1.11 (0.65;1.89) |                                                                                                                                                                                                                                                                         |
|               | Combined ABA    | 14,685     | NR       | NR                       | NR                      | REF              |                                                                                                                                                                                                                                                                         |

|                     |       |        |     |                            |     |                  |                                                                                                                                                                                                                                                                                                                                                                                                                                                  |
|---------------------|-------|--------|-----|----------------------------|-----|------------------|--------------------------------------------------------------------------------------------------------------------------------------------------------------------------------------------------------------------------------------------------------------------------------------------------------------------------------------------------------------------------------------------------------------------------------------------------|
| Zhang 2016 (90)     | ABA   | 13,608 | 138 | 7.36/1000 PY (6.23; 8.70)  | NR  | REF              | age, sex, race, original reason for Medicare enrolment (old age or disability), receipt of subsidised Medicare premium (a surrogate for low income), CV risk factors, other comorbid diseases (heart failure, COPD) and use of CV medications (antihypertense medications categorised into ACE inhibitors, $\beta$ blockers, and other; statins; NSAIDs); acute myocardial infarction comparing biologics with different mechanisms to Abatacept |
|                     | ADA   | 10,241 | 77  | 6.82/1000 PY (5.46; 8.53)  | NR  | NAP              |                                                                                                                                                                                                                                                                                                                                                                                                                                                  |
|                     | CZP   | 2,956  | 19  | 8.02/1000 PY (5.11; 12.57) | NR  | NAP              |                                                                                                                                                                                                                                                                                                                                                                                                                                                  |
|                     | ETN   | 9763   | 92  | 7.91/1000 PY (6.45; 9.71)  | NR  | NAP              |                                                                                                                                                                                                                                                                                                                                                                                                                                                  |
|                     | GOL   | 1,774  | <11 | 5.71/1000 PY (2.97; 10.97) | NR  | NAP              |                                                                                                                                                                                                                                                                                                                                                                                                                                                  |
|                     | INF   | 12,758 | 171 | 8.78/1000 PY (7.56; 10.20) | NR  | NAP              |                                                                                                                                                                                                                                                                                                                                                                                                                                                  |
|                     | RTX   | 7,475  | 71  | 8.43/1000 PY (6.68; 10.64) | NR  | 1.07 (0.80;1.42) |                                                                                                                                                                                                                                                                                                                                                                                                                                                  |
|                     | TCZ   | 3,332  | 17  | 6.23/1000 PY (3.87; 10.02) | NR  | 0.88 (0.51;1.51) |                                                                                                                                                                                                                                                                                                                                                                                                                                                  |
|                     | TNF-i | NR     | NR  | NR                         | NR  | 1.28 (1.04;1.56) |                                                                                                                                                                                                                                                                                                                                                                                                                                                  |
| Generali 2018 (91)  | ETN   | 1,086  | NR  | NR                         | NR  | REF              | sex, age, disease duration, methotrexate (MTX), corticosteroids, non-steroidal anti-inflammatory drugs (NSAIDs), number of previous biologics, presence of hypertension, dyslipidaemia, diabetes and previous CV events                                                                                                                                                                                                                          |
|                     | TCZ   | 666    | NR  | NR                         | NR  | 0.39 (0.15;1.06) |                                                                                                                                                                                                                                                                                                                                                                                                                                                  |
| Lukas 2020 (92)     | TCZ   | 5,591  | 12  | 0.21/100 PY                | NAP | NAP              |                                                                                                                                                                                                                                                                                                                                                                                                                                                  |
| NAP: not applicable |       |        |     |                            |     |                  |                                                                                                                                                                                                                                                                                                                                                                                                                                                  |

Table S4.1.2.4: Baseline characteristics of RCTs investigating IL-6R/L blockers regarding myocardial infarction.

| Study                      | Treatment                  | Target        | Population          |
|----------------------------|----------------------------|---------------|---------------------|
| Giles 2020 (ENTRACTE) (89) | Tocilizumab vs. Etanercept | IL-6R vs. TNF | csDMARD-IR; TNFi-IR |

Table S4.1.2.5: Safety outcomes of RCTs regarding MACE.

| Study                      | Treatment group | N patients | N events | Incidence rate (95% CI) | age/gender aHR (I vs C) | HR               | Adjusted for                                                                               |
|----------------------------|-----------------|------------|----------|-------------------------|-------------------------|------------------|--------------------------------------------------------------------------------------------|
| Giles 2020 (ENTRACTE) (89) | TCZ             | 1,538      | 29       | 0.61/100 PY (0.41;0.87) | NR                      | 0.90 (0.54;1.48) | stratified by previous exposure to TNF-i therapy and history of cardiovascular (CV) events |
|                            | ETN             | 1,542      | 32       | 0.67/100 PY (0.46;0.95) | NR                      | REF              |                                                                                            |

#### 4.1.3: Stroke/Transient ischemic attack: Comparison between IL-6R/L blockers and different bDMARDs (observational studies/randomized controlled trials)

Table S4.1.3.1: Baseline characteristics of observational studies investigating IL-6R/L blockers regarding stroke/transient ischemic attack.

| Study              | Registry                                                                           | Inclusion criteria                                                                                       | Exclusion criteria                                                                                                                                                                                                                                                                                     |
|--------------------|------------------------------------------------------------------------------------|----------------------------------------------------------------------------------------------------------|--------------------------------------------------------------------------------------------------------------------------------------------------------------------------------------------------------------------------------------------------------------------------------------------------------|
| Kim 2017 (86)      | US health care claims databases: Medicare, IMS PharMetrics Plus, Truven MarketScan | RA (ICD9 codes) patients, ≥ 18 years, starting TCZ or TNFi after failure of at least 1 bDMARD or tsDMARD | Nursing home residents, patients with HIV/AIDS, malignancy other than NMSC, end-stage renal disease, patients undergone dialysis or renal transplant prior index date; patients who received RTX, patients with hospitalizations for MI, stroke, ACS, or heart failure in the 90 days prior index date |
| Kim 2018 (87)      |                                                                                    |                                                                                                          |                                                                                                                                                                                                                                                                                                        |
| Generali 2018 (91) | Administrative healthcare database Italy                                           | RA (ICD9 codes), patients starting treatment with TCZ or ETN for the first time                          | none                                                                                                                                                                                                                                                                                                   |
| Lukas 2020 (92)    | REGATE (French)                                                                    | RA patients treated with TCZ                                                                             | none                                                                                                                                                                                                                                                                                                   |

Table S4.1.3.2: Safety outcomes of observational studies regarding stroke/transient ischemic attack.

| Study              | Treatment group | N patients | N events | Incidence rate (95% CI)  | age/gender aHR (I vs C) | aHR (I vs C)      | Adjusted for                                                                                                                                                                                                                                                            |
|--------------------|-----------------|------------|----------|--------------------------|-------------------------|-------------------|-------------------------------------------------------------------------------------------------------------------------------------------------------------------------------------------------------------------------------------------------------------------------|
| Kim 2017 (86)      | Combined TCZ    | 9,218      | 23       | 0.33/100 PY (0.21; 0.49) | NR                      | 0.94 (0.56; 1.59) | demographics (age, sex, region, race/ethnicity [only available in the Medicare data]), prior DMARD use, cardiovascular comorbidities, other chronic diseases, cardiovascular medications, other long-term medications, and markers of health care utilization intensity |
|                    | Combined TNF-i  | 18,810     | 49       | 0.32/100 PY (0.24; 0.42) | NR                      | REF               |                                                                                                                                                                                                                                                                         |
| Kim 2018 (87)      | Combined TCZ    | 6,237      | NR       | NR                       | NR                      | 0.73 (0.39; 1.39) |                                                                                                                                                                                                                                                                         |
|                    | Combined ABA    | 14,685     | NR       | NR                       | NR                      | REF               |                                                                                                                                                                                                                                                                         |
| Generali 2018 (91) | ETN             | 1,086      | NR       | NR                       | NR                      | REF               | sex, age, disease duration, methotrexate (MTX), corticosteroids, non-steroidal anti-inflammatory drugs (NSAIDs), number of previous biologics, presence of hypertension, dyslipidaemia, diabetes and previous CV events                                                 |
|                    | TCZ             | 666        | NR       | NR                       | NR                      | 1.44 (0.24;8.68)  |                                                                                                                                                                                                                                                                         |
| Lukas 2020 (92)    | TCZ             | 5,591      | 23       | 0.41/100 PY              | NAP                     | NAP               |                                                                                                                                                                                                                                                                         |

Table S4.1.3.3: Baseline characteristics of RCTs investigating IL-6R/L blockers regarding stroke/transient ischemic attack.

| Study                      | Treatment                  | Target        | Population          |
|----------------------------|----------------------------|---------------|---------------------|
| Giles 2020 (ENTRACTE) (89) | Tocilizumab vs. Etanercept | IL-6R vs. TNF | csDMARD-IR; TNFi-IR |

Table S4.1.3.4: Safety outcomes of RCTs regarding stroke/transient ischemic attack.

| Study                      | Treatment group | N patients | N events | Incidence rate (95% CI) | age/gender aHR (I vs C) | HR               | Adjusted for                                                                               |
|----------------------------|-----------------|------------|----------|-------------------------|-------------------------|------------------|--------------------------------------------------------------------------------------------|
| Giles 2020 (ENTRACTE) (89) | TCZ             | 1,538      | 26       | 0.53/100 PY (0.35;0.78) | NR                      | 1.55 (0.83;2.90) | stratified by previous exposure to TNF-i therapy and history of cardiovascular (CV) events |
|                            | ETN             | 1,542      | 16       | 0.35/100 PY (0.20;0.56) | NR                      | REF              |                                                                                            |



#### 4.1.4: Heart failure: Comparison between IL-6R/L blockers and different bDMARDs (observational studies/randomized controlled trials)

Table S4.1.4.1: Baseline characteristics of observational studies investigating IL-6R/L blockers regarding heart failure.

| Study         | Registry                                                                           | Inclusion criteria                                                                                       | Exclusion criteria                                                                                                                                                                                                                                                                                     |
|---------------|------------------------------------------------------------------------------------|----------------------------------------------------------------------------------------------------------|--------------------------------------------------------------------------------------------------------------------------------------------------------------------------------------------------------------------------------------------------------------------------------------------------------|
| Kim 2018 (87) | US health care claims databases: Medicare, IMS PharMetrics Plus, Truven MarketScan | RA (ICD9 codes) patients, ≥ 18 years, starting TCZ or TNFi after failure of at least 1 bDMARD or tsDMARD | Nursing home residents, patients with HIV/AIDS, malignancy other than NMSC, end-stage renal disease, patients undergone dialysis or renal transplant prior index date; patients who received RTX, patients with hospitalizations for MI, stroke, ACS, or heart failure in the 90 days prior index date |

Table S4.1.4.2: Safety outcomes of observational studies regarding heart failure.

| Study         | Treatment group | N patients | N events | Incidence rate (95% CI) | age/gender aHR (I vs C) | aHR (I vs C)      | Adjusted for                                                                                                                                                                                              |
|---------------|-----------------|------------|----------|-------------------------|-------------------------|-------------------|-----------------------------------------------------------------------------------------------------------------------------------------------------------------------------------------------------------|
| Kim 2018 (87) | Combined TCZ    | 6,237      | 32       | NR                      | NR                      | 1.18 (0.71; 1.97) | demographics (age, sex, region, race/ethnicity [only available in the Medicare data]), prior DMARD use, cardiovascular comorbidities, other chronic diseases, cardiovascular medications, other long-term |
|               | Combined ABA    | 14,685     | 112      | NR                      | NR                      | REF               |                                                                                                                                                                                                           |



#### 4.1.5: Coronary Revascularisation: Comparison between IL-6R/L blockers and different bDMARDs (observational studies/randomized controlled trials)

Table S4.1.5.1: Baseline characteristics of observational studies investigating IL-6R/L blockers regarding coronary revascularization.

| Study         | Registry                                                                           | Inclusion criteria                                                                                       | Exclusion criteria                                                                                                                                                                                                                                                                                     |
|---------------|------------------------------------------------------------------------------------|----------------------------------------------------------------------------------------------------------|--------------------------------------------------------------------------------------------------------------------------------------------------------------------------------------------------------------------------------------------------------------------------------------------------------|
| Kim 2018 (87) | US health care claims databases: Medicare, IMS PharMetrics Plus, Truven MarketScan | RA (ICD9 codes) patients, ≥ 18 years, starting TCZ or TNFi after failure of at least 1 bDMARD or tsDMARD | Nursing home residents, patients with HIV/AIDS, malignancy other than NMSC, end-stage renal disease, patients undergone dialysis or renal transplant prior index date; patients who received RTX, patients with hospitalizations for MI, stroke, ACS, or heart failure in the 90 days prior index date |

Table S4.1.5.2: Safety outcomes of observational studies regarding coronary revascularization.

| Study         | Treatment group | N patients | N events | Incidence rate (95% CI) | age/gender aHR (I vs C) | aHR (I vs C)      | Adjusted for                                                                                                                                                                                              |
|---------------|-----------------|------------|----------|-------------------------|-------------------------|-------------------|-----------------------------------------------------------------------------------------------------------------------------------------------------------------------------------------------------------|
| Kim 2018 (87) | Combined TCZ    | 6,237      | NR       | NR                      | NR                      | 0.97 (0.56; 1.68) | demographics (age, sex, region, race/ethnicity [only available in the Medicare data]), prior DMARD use, cardiovascular comorbidities, other chronic diseases, cardiovascular medications, other long-term |
|               | Combined ABA    | 14,685     | NR       | NR                      | NR                      | REF               |                                                                                                                                                                                                           |

|  |  |  |  |  |  |  |                                                               |
|--|--|--|--|--|--|--|---------------------------------------------------------------|
|  |  |  |  |  |  |  | medications, and markers of health care utilization intensity |
|--|--|--|--|--|--|--|---------------------------------------------------------------|

#### 4.1.6: Venous thromboembolism (VTE): Comparison between IL-6R/L blockers and different bDMARDs (randomized controlled trials)

Table S4.1.6.1: Baseline characteristics of RCTs investigating IL-6R/L blockers regarding VTE.

| Study                      | Treatment                  | Target        | Population          |
|----------------------------|----------------------------|---------------|---------------------|
| Giles 2020 (ENTRACTE) (89) | Tocilizumab vs. Etanercept | IL-6R vs. TNF | csDMARD-IR; TNFi-IR |

Table S4.1.6.2: Safety outcomes of RCTs regarding VTE.

| Study                      | Treatment group | N patients | N events | Incidence rate (95% CI) | age/gender aHR (I vs C) | HR               | Adjusted for                                                                               |
|----------------------------|-----------------|------------|----------|-------------------------|-------------------------|------------------|--------------------------------------------------------------------------------------------|
| Giles 2020 (ENTRACTE) (89) | TCZ             | 1,538      | DVT: 10  | 0.2/100 PY              | NR                      | 0.83 (0.34;2.03) | stratified by previous exposure to TNF-i therapy and history of cardiovascular (CV) events |
|                            |                 |            | PE: 1    | 0.06/100 PY             | NR                      | 0.13 (0.02;1.04) |                                                                                            |
|                            | ETN             | 1,542      | DVT: 12  | 0.3/100 PY              | NR                      | REF              |                                                                                            |
|                            |                 |            | PE: 8    | 0.2/100 PY              | NR                      | REF              |                                                                                            |

DVT: deep vein thrombosis; PE: pulmonary embolism

## 4.2. Vaccination

### 4.2.1: Vaccination: Comparison between IL-6R/L blockers and different b/csDMARDs (clinical trials)

Table S4.2.1.1: Included clinical trials investigating IL-6R/L blockers regarding antibody response after vaccination.

| Study                        | Treatment                                                                             | Population                                                                                                 | Antibody response to                              | Intervention                                                                                               | Outcome                                                                                                                                                            |
|------------------------------|---------------------------------------------------------------------------------------|------------------------------------------------------------------------------------------------------------|---------------------------------------------------|------------------------------------------------------------------------------------------------------------|--------------------------------------------------------------------------------------------------------------------------------------------------------------------|
| Crnkic Kapetanovic 2013 (93) | Rituximab Mono vs. Rituximab + MTX vs. Abatacept vs. Tocilizumab vs. MTX vs. Controls | RA patients receiving MTX or bDMARDs other than TNF-i                                                      | pneumococcal conjugate vaccine                    | one dose (0.5 ml) of heptavalent pneumococcal conjugate vaccine (Prevenar) intramuscularly                 | IgG Streptococcus pneumoniae capsular polysaccharides 6B and 23F (before and week 4 and 6)                                                                         |
| Mori 2013 (94)               | Tocilizumab vs. Tocilizumab+MTX vs. MTX vs. Controls                                  | RA patients receiving TCZ (at least the first dose of 8 mg/kg IV Q4W) and/or MTX for $\geq 12$ weeks       | pneumococcal polysaccharide vaccine               | 23-valent pneumococcal polysaccharide vaccine (PPV23)                                                      | IgG Streptococcus pneumoniae capsular polysaccharides 6B and 23F (before and week 4 and 6) and functional antibody activity reported as opsonisation indices (OIs) |
| Tsuru 2014 (95)              | Tocilizumab vs. TNF-I vs. csDMARDs                                                    | Patients (n=28 RA and n=10 Castleman's disease) were treated with TCZ, 15 RA patients treated with TNF-i + | influenza and pneumococcal polysaccharide vaccine | single dose containing A (New Caledonia (NC):H1N1), A (Hiroshima (HIR):H3N2) and B (Malaysia (MAL) strain; | Antibody titers were measured every 4 weeks for a total of 12 weeks after vaccination                                                                              |

|                                |                                  |                                                          |                                                                              |                                                                                               |                                                                                                                             |
|--------------------------------|----------------------------------|----------------------------------------------------------|------------------------------------------------------------------------------|-----------------------------------------------------------------------------------------------|-----------------------------------------------------------------------------------------------------------------------------|
|                                |                                  | MTX and 24 patients treated with csDMARDs                |                                                                              | 23-valent pneumococcal polysaccharide vaccine (PPV23) (TCZ group, n=21)                       |                                                                                                                             |
| Bingham III 2015 (VISARA) (96) | Tocilizumab + MTX vs. MTX        | RA patients, TNFi-IR                                     | pneumococcal polysaccharide vaccine (PPV23) and tetanus toxoid vaccine (TTV) | Week 3:<br>PPV23 administered i.m or s.c<br>TTV administered i.m in opposite deltoid          | % of patients responding to ≥6/12 (PPV23) serotypes (primary) and % responding to TTV (secondary) at week 8                 |
| Shinoki 2012 (97)              | Tocilizumab vs. healthy controls | sJIA patients treated with TCZ±GC±NSAID (no csDMARD/MTX) | influenza vaccine                                                            | standard doses of A/Solomon/3/2006(H1N1), A/Hiroshima/52/2005(H3N2), and B/Malaysia/2506/2004 | seroprotection after vaccination; Blood samples were drawn before and 4–7 weeks (mean 5.2 weeks) after the last vaccination |

Table S4.2.1.2: Risk of bias analysis

| Study                        | Random sequence generation | Allocation concealment | Blinding of participants and personnel | Blinding of outcome assessment | Incomplete outcome data | Selective reporting | Other sources of bias | Summary | Comment        |
|------------------------------|----------------------------|------------------------|----------------------------------------|--------------------------------|-------------------------|---------------------|-----------------------|---------|----------------|
| Crnkic Kapetanovic 2013 (93) | Unclear                    | Unclear                | High                                   | High                           | Low                     | Low                 | Low                   | High    | Not randomized |
| Mori 2013 (94)               | Unclear                    | Unclear                | High                                   | High                           | Low                     | Low                 | Low                   | High    | Open label     |

|                                |         |         |      |         |     |     |     |      |                |
|--------------------------------|---------|---------|------|---------|-----|-----|-----|------|----------------|
| Tsuru 2014 (95)                | Unclear | Unclear | High | High    | Low | Low | Low | High | Open label     |
| Bingham III 2015 (VISARA) (96) | Unclear | Unclear | High | Unclear | Low | Low | Low | High | Open label     |
| Shinoki 2012 (97)              | Unclear | Unclear | High | High    | Low | Low | Low | High | Not randomized |

Table S4.2.1.3: Outcomes of clinical trials investigating IL-6R/L blockers regarding antibody response after vaccination.

| Study                        | Primary / Secondary outcome                                                                                                                                                                                                                                                                                                                                                | Treatment arm                     | No. of patients (n) | Result                              | p/95% CI |
|------------------------------|----------------------------------------------------------------------------------------------------------------------------------------------------------------------------------------------------------------------------------------------------------------------------------------------------------------------------------------------------------------------------|-----------------------------------|---------------------|-------------------------------------|----------|
| Crnkic Kapetanovic 2013 (93) | antibody response (AR) defined as post- and pre-vaccination ratio of antibody levels and positive antibody response (posAR) was AR $\geq 2$<br><br>prevaccination antibody levels for 6B, mg/L, geometric mean antibody levels (GML;95% CI);<br>postvaccination antibody levels for 6B, mg/L, GML (95% CI);<br>prevaccination antibody levels for 23F, mg/L, GML (95% CI); | RTX monotherapy                   | 29                  | 10.3%; 0.3; 0.4; 0.2; 0.3           |          |
|                              |                                                                                                                                                                                                                                                                                                                                                                            | RTX + MTX                         | 26                  | 0%; 0.4; 0.4; 0.3; 0.4              |          |
|                              |                                                                                                                                                                                                                                                                                                                                                                            | ABA                               | 17                  | 17.6%; 0.6; 1.1; 0.4; 1.1           |          |
|                              |                                                                                                                                                                                                                                                                                                                                                                            | TCZ                               | 16                  | 50%; 0.4; 1.7; 0.2; 2.2             |          |
|                              |                                                                                                                                                                                                                                                                                                                                                                            | MTX                               | 85                  | NR numerically; 2.0; 3.5; 0.7; 1.9  |          |
|                              |                                                                                                                                                                                                                                                                                                                                                                            | Controls (SpA patients on NSAIDs) | 86                  | NR numerically; 2.9; 9.5; 0.97; 6.4 |          |

|                 |                                                                                                                                                                                                                                                                                                                                                                                                                                                                                                     |                            |    |                                          |                                                                                                                                                                                                                                                                                                              |
|-----------------|-----------------------------------------------------------------------------------------------------------------------------------------------------------------------------------------------------------------------------------------------------------------------------------------------------------------------------------------------------------------------------------------------------------------------------------------------------------------------------------------------------|----------------------------|----|------------------------------------------|--------------------------------------------------------------------------------------------------------------------------------------------------------------------------------------------------------------------------------------------------------------------------------------------------------------|
|                 | postvaccination antibody levels for 23F, mg/L, GML (95% CI)                                                                                                                                                                                                                                                                                                                                                                                                                                         |                            |    |                                          |                                                                                                                                                                                                                                                                                                              |
| Mori 2013 (94)  | Positive antibody response was defined as a 2-fold or more increase in the IgG concentration or as a $\geq 10$ -fold or more increase in the OI<br><br>% of patients with twofold or more increases in serotype-specific IgG concentrations for serotypes 6B and 23F; Percentages of patients with 10-fold or more increases in OIs for serotypes 6B and 23F in the RA treatment groups                                                                                                             | MTX                        | 62 | 21%; 16%*                                | p=0.046 (TCZ vs MTX); p=0.0009 (TCZ vs TCZ+MTX); p=0.005 (TCZ vs TCZ+MTX); p=0.044 (TCZ vs Cont)<br><br>% of patients with 10-fold or more increases in OIs for serotypes 6B and 23F in the RA treatment groups. p=0.019 (TCZ vs MTX); p=0.027 (TCZ vs MTX); p=0.020 (TCZ vs TCZ+MTX). *p=0.028 (TCZ vs MTX) |
|                 |                                                                                                                                                                                                                                                                                                                                                                                                                                                                                                     | TCZ+MTX                    | 54 | 20%                                      |                                                                                                                                                                                                                                                                                                              |
|                 |                                                                                                                                                                                                                                                                                                                                                                                                                                                                                                     | TCZ                        | 50 | 46%; 34%*                                |                                                                                                                                                                                                                                                                                                              |
|                 |                                                                                                                                                                                                                                                                                                                                                                                                                                                                                                     | RA control group           | 24 | 21%;                                     |                                                                                                                                                                                                                                                                                                              |
| Tsuru 2014 (95) | seropositive response was defined as the HI titer at the post-vaccination $\geq 4$ -fold increase from the baseline titer against influenza antigen; seroprotective defined as post-vaccination HI titer $\geq 1:40$ . For pneumococcal vaccine, seropositive response was defined as $\geq 2$ -fold increase in antibody concentration from the baseline antibody levels in 6/12 serotypes of pneumococcal vaccine:<br><br>seropositive response A(NC), A(HIR), B(MAL); seroprotective level after | TCZ (RA+CD)                | 38 | 17/38; 18/38; 24/38; 36/38; 35/38; 32/38 |                                                                                                                                                                                                                                                                                                              |
|                 |                                                                                                                                                                                                                                                                                                                                                                                                                                                                                                     | TNF-i (RA)                 | 15 | 6/15; 8/15; 4/15; 11/15; 12/15; 8/15     |                                                                                                                                                                                                                                                                                                              |
|                 |                                                                                                                                                                                                                                                                                                                                                                                                                                                                                                     | DMARDs (RA)                | 24 | 18/24; 13/24; 19/24; 22/24; 23/24; 21/24 |                                                                                                                                                                                                                                                                                                              |
|                 |                                                                                                                                                                                                                                                                                                                                                                                                                                                                                                     | Pneumococcal vaccine (TCZ) | 21 | 21/21                                    |                                                                                                                                                                                                                                                                                                              |



|                                |                                                                                                                                                                                                                                                               |                             |    |                            |                                            |
|--------------------------------|---------------------------------------------------------------------------------------------------------------------------------------------------------------------------------------------------------------------------------------------------------------|-----------------------------|----|----------------------------|--------------------------------------------|
|                                | vaccination A(NC), A(HIR), B(MAL); pneumococcal vaccine: seropositive response                                                                                                                                                                                |                             |    |                            |                                            |
| Bingham III 2015 (VISARA) (96) | % of responders to ≥6 of 12 anti-pneumococcal antibody serotype; % of responders to tetanus toxoid vaccine; %patients with ≥2-fold increases in anti-tetanus toxoid antibody levels; % patients with ≥4-fold increases in anti-tetanus toxoid antibody levels | MTX*                        | 26 | 70.8%; 39.1%; 65.2%; 39.1% | 95% CI: 52.6 to 89.0; 19.2 to 59.1; NR; NR |
|                                |                                                                                                                                                                                                                                                               | TCZ IV 8mg/kg Q4W + MTX*    | 50 | 60.0%; 42.0%; 72.0%; 42.0% | 95% CI: 46.4 to 73.6; 28.3 to 55.7; NR; NR |
| Shinoki 2012 (97)              | seroprotection rate (%) after vaccination A/H1N1; seroprotection rate (%) after vaccination A/H3N2; seroprotection rate (%) after vaccination B                                                                                                               | TCZ                         | 27 | 88.9%; 85.2%, 40.7%        | p=0.40; 0.15; 0.76                         |
|                                |                                                                                                                                                                                                                                                               | age-matched healthy control | 17 | 76.5%; 100.0%; 35.3%       |                                            |
| * all patients                 |                                                                                                                                                                                                                                                               |                             |    |                            |                                            |

### 4.3. Infections

#### 4.3.1: Serious infections: Comparison between IL-6R/L blockers and different bDMARDs (observational studies/randomized controlled trials)

Table S4.3.1.1: Baseline characteristics of observational studies investigating IL-6R/L blockers regarding serious infections.

| Study                   | Registry                                                                           | Inclusion criteria                                                                                                          | Exclusion criteria                                                                                      |
|-------------------------|------------------------------------------------------------------------------------|-----------------------------------------------------------------------------------------------------------------------------|---------------------------------------------------------------------------------------------------------|
| Carrara 2019 (98)       | RECORD (health databases of Lombardy Region, Italy)                                | RA (ICD9 codes) patients treated with bDMARDs                                                                               | none                                                                                                    |
| Mori 2017 (99)          | SARABA (multiple medical centers in Japan)                                         | RA patients (ACR 1987; ACR/EULAR 2010 criteria) starting first bDMARD                                                       | patients receiving bDMARDs previously                                                                   |
| Rutherford 2018 a (100) | BSRBR-RA (British)                                                                 | RA patients treated with bDMARDs                                                                                            | none                                                                                                    |
| Pawar 2019 (101)        | US health care claims databases: Medicare, IMS PharMetrics Plus, Truven MarketScan | RA (ICD9/10 codes) patients treated with TCZ, ABA or TNF-i; $\geq 1$ different biologic agent or tofacitinib any time prior | nursing home residents and patients with pre-existing malignancy prior and at the index date; RTX users |
| Grøn 2019 (102)         | DANBIO (Danish); ARTIS (Swedish)                                                   | RA patients treated with ABA, TCZ or RTX                                                                                    | none                                                                                                    |
| Grøn 2020 (103)         | DANIBO                                                                             | RA patients treated with ABA, TCZ or RTX                                                                                    | none                                                                                                    |
| Morel 2017 (104)        | REGATE (French)                                                                    | RA patients treated with TCZ                                                                                                | none                                                                                                    |
| Sakai 2015 (105)        | REAL (Japanese)                                                                    | RA patients (1987 ACR criteria), treatment with csDMARDs or bDMARDs                                                         | none                                                                                                    |

|                |                                          |                                                                                                                                                |                                                                                          |
|----------------|------------------------------------------|------------------------------------------------------------------------------------------------------------------------------------------------|------------------------------------------------------------------------------------------|
| Yun 2016 (106) | US health care claims database: Medicare | RA (ICD9 codes) patients treated with bDMARDs after having been treated with a different biologic agent at any time (i.e., biologic switchers) | patients with PsA, psoriasis, ankylosing spondylitis (AS), or inflammatory bowel disease |
|----------------|------------------------------------------|------------------------------------------------------------------------------------------------------------------------------------------------|------------------------------------------------------------------------------------------|

Table S4.3.1.2: Risk of bias analysis (Newcastle-Ottawa Scale [NOS] for Cohort studies)

| Study                   | Representativeness of exposed cohort | Selection of non-exposed cohort | Ascertainment of exposure | Outcome not presented at start | Comparability of cohort | Assessment of outcome | Follow-up length | Adequacy of follow-up | Summary |
|-------------------------|--------------------------------------|---------------------------------|---------------------------|--------------------------------|-------------------------|-----------------------|------------------|-----------------------|---------|
| Carrara 2019 (98)       | Low                                  | Low                             | High                      | Low                            | Low                     | High                  | Low              | Low                   | High    |
| Mori 2017 (99)          | Low                                  | Low                             | Low                       | Low                            | Low                     | Low                   | Low              | Low                   | Low     |
| Rutherford 2018 a (100) | Low                                  | Low                             | Low                       | Low                            | Low                     | Low                   | Low              | Low                   | Low     |
| Pawar 2019 (101)        | Low                                  | Low                             | High                      | Low                            | Low                     | High                  | Low              | Low                   | High    |
| Grøn 2019 (102)         | Low                                  | Low                             | Low                       | Low                            | Low                     | High                  | Low              | Low                   | High    |
| Grøn 2020 (103)         | Low                                  | Low                             | Low                       | Low                            | Low                     | High                  | Low              | Low                   | High    |
| Morel 2017 (104)        | Low                                  | High                            | Low                       | Low                            | High                    | Low                   | Low              | Low                   | High    |
| Sakai 2015 (105)        | Low                                  | Low                             | Low                       | Low                            | Low                     | Low                   | Low              | Low                   | Low     |

|                |     |     |      |     |     |      |     |     |      |
|----------------|-----|-----|------|-----|-----|------|-----|-----|------|
| Yun 2016 (106) | Low | Low | High | Low | Low | High | Low | Low | High |
|----------------|-----|-----|------|-----|-----|------|-----|-----|------|

Table S4.3.1.3: Safety outcomes of observational studies regarding serious infections.

| Study             | Treatment group | N patients | N events | Incidence rate (95% CI)  | age/gender aHR (I vs C) | aHR (I vs C)     | Adjusted for                                                                                                                                                |
|-------------------|-----------------|------------|----------|--------------------------|-------------------------|------------------|-------------------------------------------------------------------------------------------------------------------------------------------------------------|
| Carrara 2019 (98) | ETN             | NR         | 68       | 8.2/1000 PY (6.4;10.4)   | NR                      | REF              | sex, age, disease duration, Charlson Comorbidity Index, concomitant use of MTX, leflunomide, GC, NSAIDs, number of previous bDMARDs and previous infections |
|                   | ADA             | NR         | 52       | 10.7/1000 PY (8;14.1)    | NR                      | 1.37 (0.95;1.96) |                                                                                                                                                             |
|                   | IFX             | NR         | 26       | 8.1/1000 PY (5.3;11.9)   | NR                      | 0.96 (0.60;1.56) |                                                                                                                                                             |
|                   | CZP             | NR         | 4        | 9. /1000 PY (2.7;25.2)   | NR                      | 1.31 (0.48;3.58) |                                                                                                                                                             |
|                   | GOL             | NR         | 4        | 8.8/1000 PY (2.4;22.7)   | NR                      | 1.09 (0.37;3.21) |                                                                                                                                                             |
|                   | ABA             | NR         | 4        | 2.8/1000 PY (0.8;7.3)    | NR                      | 0.29 (0.10;0.82) |                                                                                                                                                             |
|                   | RTX             | NR         | 13       | 13.2/1000 PY (7.0;22.6)  | NR                      | 0.95 (0.48;1.91) |                                                                                                                                                             |
|                   | TCZ             | NR         | 10       | 10.8 /1000 PY (5.2;19.8) | NR                      | 1.24 (0.59;2.61) |                                                                                                                                                             |

|                         |                |        |       |                            |    |                  |                                                                                                                                                                                                                                                               |
|-------------------------|----------------|--------|-------|----------------------------|----|------------------|---------------------------------------------------------------------------------------------------------------------------------------------------------------------------------------------------------------------------------------------------------------|
| Mori 2017 (99)          | ETN            | 413    | 25    | 8.0/100 PY<br>(5.4;11.9)   | NR | REF              | age, sex, BMI, smoking history, RA duration, RA stage III/IV, RA class 3/4, previous use of biological agents, concurrent use of MTX, concurrent use of prednisolone, and comorbid diseases (chronic kidney disease, diabetes mellitus, chronic lung disease) |
|                         | IFX            | 335    | 15    | 5.7/100 PY<br>(3.5;9.5)    | NR | 1.54 (0.78;3.04) |                                                                                                                                                                                                                                                               |
|                         | ADA            | 264    | 15    | 7.4/100 PY<br>(4.5;12.3)   | NR | 1.72 (0.88;3.34) |                                                                                                                                                                                                                                                               |
|                         | ABA            | 189    | 12    | 8.4/100 PY<br>(4.8;14.8)   | NR | 1.11 (0.55;2.21) |                                                                                                                                                                                                                                                               |
|                         | TCZ            | 395    | 19    | 6.0/100 PY<br>(3.8;9.4)    | NR | 1.02 (0.55;1.87) |                                                                                                                                                                                                                                                               |
| Rutherford 2018 a (100) | ETN            | 8,630  | 852   | 5.56/100 PY<br>(5.20;5.95) | NR | REF              | age, gender, DAS28-ESR, HAQ, disease duration, smoking, seropositivity, polypharmacy, baseline steroid usage                                                                                                                                                  |
|                         | IFX            | 4,908  | 472   | 5.35/100 PY<br>(4.89;5.85) | NR | 0.89 (0.79;1.00) |                                                                                                                                                                                                                                                               |
|                         | ADA            | 7,818  | 709   | 5.42/100 PY<br>(5.04;5.84) | NR | 1.00 (0.90;1.10) |                                                                                                                                                                                                                                                               |
|                         | RTX            | 5,101  | 372   | 6.29/100 PY<br>(5.69;6.97) | NR | 0.91 (0.80;1.03) |                                                                                                                                                                                                                                                               |
|                         | TCZ            | 2,174  | 137   | 6.98/100 PY<br>(5.90;8.25) | NR | 1.21 (1.01;1.46) |                                                                                                                                                                                                                                                               |
|                         | CZP            | 1,446  | 64    | 3.80/100 PY<br>(2.97;4.85) | NR | 0.75 (0.58;0.97) |                                                                                                                                                                                                                                                               |
| Pawar 2019 (101)        | Combined TCZ   | 16,074 | 618   | 4.68/100 PY<br>(4.31;5.05) | NR | 1.05 (0.95;1.16) | index year, demographics, comorbid conditions, combined comorbidity index, claims-based index of RA severity index, use of DMARDs (during all available data) and other prescription drugs                                                                    |
|                         | Combined TNF-i | 33,109 | 1,155 | 3.99/100 PY<br>(3.76;4.22) | NR | REF              |                                                                                                                                                                                                                                                               |

|                     |              |        |     |                              |                  |                            |                                                                                                                                                                                                                                                                                                                                                       |
|---------------------|--------------|--------|-----|------------------------------|------------------|----------------------------|-------------------------------------------------------------------------------------------------------------------------------------------------------------------------------------------------------------------------------------------------------------------------------------------------------------------------------------------------------|
|                     | Combined ABA | 10,414 | 295 | 3.24/100 PY<br>(2.87;3.61)   | NR               | 1.40 (1.20; 1.63)          | including GC, NSAIDs and analgesics, use of prophylactic antibiotics/antivirals, vaccination, history of any invasive procedures or surgery; cancer screening tests; physician orders of outpatient laboratory tests for acute phase reactants                                                                                                        |
| Grøn 2019<br>(102)  | Combined ABA | 2,725  | NR  | NR                           | 0.93 (0.74;1.15) | 0.88 (0.69; 1.12)          | age, gender, DAS28, disease duration, HAQ, smoking, previous malignancy, previous serious infection, previous number of prescriptions, previous COPD, tertiles of prescriptions                                                                                                                                                                       |
|                     | Combined RTX | 3,363  | NR  | NR                           | REF              | REF                        |                                                                                                                                                                                                                                                                                                                                                       |
|                     | Combined TCZ | 2,899  | NR  | NR                           | 0.75 (0.60;0.95) | 0.78 (0.61; 1.01)          |                                                                                                                                                                                                                                                                                                                                                       |
| Grøn 2020<br>(103)* | ABA          | 1,115  | 598 | 76/100 PY<br>(70;80)         | NR               | 0.94 (0.81; 1.08)          | calendar year, RA disease duration (years), number of previous bDMARDs, GCs, DAS28, HAQ, CRP, use of concomitant MTX, IgM RF status, current smoking status, history of cancer, hospitalized, knee or hip prosthesis, COPD, diabetes, myocardial infarction, or chronic kidney disease, reimbursement of a prescription of antibiotics and antivirals |
|                     | RTX          | 1,017  | 579 | 66/100 PY<br>(61;72)         | NR               | REF                        |                                                                                                                                                                                                                                                                                                                                                       |
|                     | TCZ          | 1,564  | 883 | 69/100 PY<br>(65;75)         | NR               | 0.94 (0.81; 1.03)          |                                                                                                                                                                                                                                                                                                                                                       |
| Morel 2017<br>(104) | TCZ          | 1,491  | 125 | 4.7/100 PY<br>(3.8; 5.5)     | NR               | no control group/reference | -                                                                                                                                                                                                                                                                                                                                                     |
| Sakai 2015<br>(105) | TNF-i        | 304    | 7   | 3.03/100 PY<br>(1.35;5.95)   | NR               | REF                        | age, gender, DAS28-CRP, comorbidity, corticosteroids $\geq$ 5 mg/day                                                                                                                                                                                                                                                                                  |
|                     | TCZ          | 302    | 24  | 10.68/100 PY<br>(7.02;15.63) | NR               | 2.23 (0.93;5.37)           |                                                                                                                                                                                                                                                                                                                                                       |

|                                                                                                                                                                                                       |     |       |     |                            |    |                  |                                                                                                                                                                                                 |
|-------------------------------------------------------------------------------------------------------------------------------------------------------------------------------------------------------|-----|-------|-----|----------------------------|----|------------------|-------------------------------------------------------------------------------------------------------------------------------------------------------------------------------------------------|
| Yun 2016 (106)                                                                                                                                                                                        | ADA | 4,845 | 317 | 14.6/100 PY<br>(13.1;16.3) | NR | 1.08 (0.93;1.25) | infection risk score decile, number of previous bDMARDs, disability status, GC use during baseline, MTX use during baseline, most recent bDMARD used during baseline, and Medicaid eligibility. |
|                                                                                                                                                                                                       | CZP | 1,866 | 106 | 14.2/100 PY<br>(11.7;17.2) | NR | 1.07 (0.86;1.32) |                                                                                                                                                                                                 |
|                                                                                                                                                                                                       | ETN | 3,814 | 87  | 14.1/100 PY<br>(11.5;17.4) | NR | 1.24 (1.07;1.45) |                                                                                                                                                                                                 |
|                                                                                                                                                                                                       | GOL | 1,394 | 275 | 15.9/100 PY<br>(14.2;17.9) | NR | 1.14 (0.90;1.44) |                                                                                                                                                                                                 |
|                                                                                                                                                                                                       | IFX | 3,944 | 370 | 17.0/100 PY<br>(15.3;18.8) | NR | 1.39 (1.21;1.60) |                                                                                                                                                                                                 |
|                                                                                                                                                                                                       | RTX | 4,718 | 541 | 18.7/100 PY<br>(17.2;20.3) | NR | 1.36 (1.21;1.53) |                                                                                                                                                                                                 |
|                                                                                                                                                                                                       | TCZ | 2,016 | 129 | 14.9/100 PY<br>(12.6;17.8) | NR | 1.10 (0.89;1.34) |                                                                                                                                                                                                 |
|                                                                                                                                                                                                       | ABA | 9,204 | 705 | 13.1/100 PY<br>(12.2;14.1) | NR | REF              |                                                                                                                                                                                                 |
| * overall infections; defined as a prescription of antibiotics or hospitalization due to infection; data reported as 0-24 months after starting treatment; incidence rate adjusted for age and gender |     |       |     |                            |    |                  |                                                                                                                                                                                                 |

Table S4.3.1.4.1: Safety outcomes of observational studies regarding subtypes of serious infections.

| Study                   | Treatment group | Incidence rate (95% CI) Sepsis | aHR (95% CI) Sepsis | Incidence rate (95% CI) Respiratory infection | aHR (95% CI) Respiratory infection | Incidence rate (95% CI) Skin infection | aHR (95% CI) Skin infection | Incidence rate (95% CI) GI-infection | aHR (95% CI) GI-infection |
|-------------------------|-----------------|--------------------------------|---------------------|-----------------------------------------------|------------------------------------|----------------------------------------|-----------------------------|--------------------------------------|---------------------------|
| Rutherford 2018 a (100) | ETN             | 0.15/100 PY (0.10;0.23)        | REF                 | 1.82/100 PY (1.61;2.04)                       | REF                                | 1.31/100 PY (1.14;1.51)                | REF                         | 0.5/100 PY (0.40;0.63)               | REF                       |
|                         | IFX             | 0.14/100 PY (0.08;0.24)        | 0.83 (0.41;1.66)    | 2.25/100 PY (1.96;2.59)                       | 1.16 (0.96;1.39)                   | 1.21/100 PY (1.00;1.46)                | 0.84 (0.66;1.06)            | 0.51/100 PY (0.38;0.68)              | 0.95 (0.66;1.38)          |
|                         | ADA             | 0.16/100 PY (0.10;0.25)        | 1.04 (0.57;1.91)    | 2.28/100 PY (2.04;2.55)                       | 1.23 (1.04;1.45)                   | 0.89/100 PY (0.74;1.06)                | 0.65 (0.52;0.82)            | 0.38/100 PY (0.29;0.50)              | 0.77 (0.54;1.11)          |
|                         | RTX             | 0.44/100 PY (0.30;0.64)        | 2.08 (1.14;3.80)    | 2.71/100 PY (2.32;3.16)                       | 1.03 (0.83;1.28)                   | 0.9/100 PY (0.69;1.17)                 | 0.54 (0.39;0.75)            | 0.58/100 PY (0.41;0.81)              | 0.93 (0.61;1.42)          |
|                         | TCZ             | 0.31/100 PY (0.14;0.68)        | 1.83 (0.63;5.35)    | 3.16/100 PY (2.46;4.05)                       | 1.61 (1.15;2.25)                   | 1.38/100 PY (0.94;2.01)                | 0.71 (0.40;1.24)            | 0.76/100 PY (0.46;1.27)              | 1.45 (0.72;2.90)          |
|                         | CZP             | 0.12/100 PY (0.03;0.47)        | 1.03 (0.24;4.41)    | 1.72/100 PY (1.20;2.48)                       | 0.96 (0.63;1.46)                   | 0.42/100 PY (0.20;0.87)                | 0.27 (0.11;0.67)            | 0.18/100 PY (0.06;0.55)              | 0.51 (0.16;1.63)          |
| Pawar 2019 (101)        | Combined TCZ    | 1.72/100 PY (1.50;1.95)        | 1.04 (0.88;1.22)    | 1.39/100 PY (1.19;1.59)                       | 0.92 (0.77;1.10)                   | 0.28/100 PY (0.19;0.36)                | 2.38 (1.47;3.86)            | 0.52/100 PY (0.40;0.64)*             | 2.34 (1.64; 3.34)*        |
|                         | Combined TNF-i  | 1.51/100 PY (1.37;1.65)        | REF                 | 1.34/100 PY (1.21;1.48)                       | REF                                | 0.12/100 PY (0.08;0.15)                | REF                         | 0.21 /100 PY (0.16;0.26)*            | REF*                      |
|                         | Combined ABA    | NR                             | NR                  | NR                                            | NR                                 | NR                                     | NR                          | NR*                                  | NR*                       |



|                  |       |                            |    |                            |    |                             |    |                             |    |
|------------------|-------|----------------------------|----|----------------------------|----|-----------------------------|----|-----------------------------|----|
| Sakai 2015 (105) | TCZ   | 1.34/100 PY<br>(0.37;3.56) | NA | 3.12/100 PY<br>(1.39;6.12) | NR | 1.78/100 PY<br>(0.60; 4.23) | NR | 0.89/100 PY<br>(0.18; 2.85) | NR |
|                  | TNF-i | 0                          | NA | 1.30/100 PY<br>(0.36;3.46) | NR | 0.43/100 PY<br>(0.04;2.02)  | NR | 0.43/100 PY<br>(0.04; 2.02) | NR |
| * diverticulitis |       |                            |    |                            |    |                             |    |                             |    |

Table S4.3.1.4.2: Safety outcomes of observational studies regarding subtypes of serious infections.

| Study                   | Treatment group | Incidence rate (95% CI) Bone/joint infection | aHR (95% CI) Bone/joint infection | Incidence rate (95% CI) Genitourinary infection | aHR (95% CI) Genitourinary infection | Incidence rate (95% CI) Other infection | aHR (95% CI) Other infection |
|-------------------------|-----------------|----------------------------------------------|-----------------------------------|-------------------------------------------------|--------------------------------------|-----------------------------------------|------------------------------|
| Rutherford 2018 a (100) | ETN             | 0.67/100 PY<br>(0.55;0.81)                   | REF                               | 0.61/100 PY<br>(0.50;0.75)                      | REF                                  | 0.36/100 PY<br>(0.28;0.47)              | REF                          |
|                         | IFX             | 0.43/100 PY<br>(0.31;0.59)                   | 0.56 (0.38; 0.83)                 | 0.48/100 PY<br>(0.35;0.64)                      | 0.74 (0.50;1.07)                     | 0.25/100 PY<br>(0.16;0.38)              | 0.54 (0.31;0.91)             |
|                         | ADA             | 0.51/100 PY<br>(0.40;0.65)                   | 0.80 (0.58; 1.09)                 | 0.68/100 PY<br>(0.55;0.84)                      | 1.18 (0.87;1.59)                     | 0.41/100 PY<br>(0.31;0.53)              | 1.08 (0.74 1.58)             |
|                         | RTX             | 0.49/100 PY<br>(0.34;0.71)                   | 0.67 (0.43; 1.02)                 | 0.81/100 PY<br>(0.61;1.08)                      | 1.15 (0.79;1.68)                     | 0.32/100 PY<br>(0.21;0.50)              | 0.72 (0.41;1.29)             |
|                         | TCZ             | 0.46/100 PY<br>(0.24;0.88)                   | 0.46 (0.17; 1.27)                 | 0.46/100 PY<br>(0.24;0.88)                      | 0.67 (0.27;1.66)                     | 0.41/100 PY<br>(0.20;0.81)              | 1.15 (0.49;2.67)             |

|                     |                |                            |                   |                            |                  |                             |                  |
|---------------------|----------------|----------------------------|-------------------|----------------------------|------------------|-----------------------------|------------------|
|                     | CZP            | 0.53/100 PY<br>(0.28;1.03) | 0.73 (0.32; 1.68) | 0.36/100 PY<br>(0.16;0.79) | 0.55 (0.20;1.52) | 0.3/100 PY<br>(0.12;0.71)   | 0.50 (0.16;1.60) |
| Pawar 2019<br>(101) | Combined TCZ   | NR                         | NR                | 0.49/100 PY<br>(0.37;0.60) | 0.77 (0.58;1.04) | NR                          | NR               |
|                     | Combined TNF-i | NR                         | NR                | 0.54/100 PY<br>(0.46;0.63) | REF              | NR                          | NR               |
|                     | Combined ABA   | NR                         | NR                | NR                         | NR               | NR                          | NR               |
| Sakai 2015 (105)    | TCZ            | 2.23/100 PY<br>(0.84;4.88) | NA                | 0.89/100 PY<br>(0.18;2.85) | NR               | 0.45/100 PY<br>(0.04;2.08)  | NR               |
|                     | TNF-i          | 0                          | NA                | 0.43/100 PY<br>(0.04;2.02) | NR               | 0.43/100 PY<br>(0.04; 2.02) | NR               |

#### 4.3.2: Opportunistic infections: Comparison between IL-6R/L blockers and different bDMARDs (observational studies/randomized controlled trials)

Table S4.3.2.1: Baseline characteristics of observational studies investigating IL-6R/L blockers regarding opportunistic infections.

| Study            | Registry                                                                           | Inclusion criteria                                                                                                    | Exclusion criteria                                                                                      |
|------------------|------------------------------------------------------------------------------------|-----------------------------------------------------------------------------------------------------------------------|---------------------------------------------------------------------------------------------------------|
| Pawar 2019 (101) | US health care claims databases: Medicare, IMS PharMetrics Plus, Truven MarketScan | RA (ICD9/10 codes) patients treated with TCZ, ABA or TNF-i; ≥1 different biologic agent or tofacitinib any time prior | nursing home residents and patients with pre-existing malignancy prior and at the index date; RTX users |

|                         |                                            |                                                 |                                                                              |
|-------------------------|--------------------------------------------|-------------------------------------------------|------------------------------------------------------------------------------|
| Rutherford 2018 b (107) | BSRBR-RA                                   | RA patients treated with bDMARDs                | a priori decision by authors to exclude tuberculosis (TB) from main analysis |
| Leon 2019 (108)         | Hospital Clínico San Carlos, Madrid, Spain | RA (ICD 10 codes) patients treated with bDMARDs | none                                                                         |

Table S4.3.2.2: Risk of bias analysis (Newcastle-Ottawa Scale [NOS] for Cohort studies)

| Study                   | Representative-ness of exposed cohort | Selection of non-exposed cohort | Ascertainment of exposure | Outcome not presented at start | Comparability of cohort | Assessment of outcome | Follow-up length | Adequacy of follow-up | Summary |
|-------------------------|---------------------------------------|---------------------------------|---------------------------|--------------------------------|-------------------------|-----------------------|------------------|-----------------------|---------|
| Rutherford 2018 b (107) | Low                                   | Low                             | Low                       | Low                            | Low                     | Low                   | Low              | Low                   | Low     |
| Leon 2019 (108)         | Low                                   | Low                             | Low                       | Low                            | Low                     | Low                   | Low              | Low                   | Low     |

Table S4.3.2.3: Safety outcomes of observational studies regarding opportunistic infections.

| Study            | Treatment group | N patients | N events | Incidence rate (95% CI) | age/gender aHR (I vs C) | aHR (I vs C)      | Adjusted for                                                                                                                                             |
|------------------|-----------------|------------|----------|-------------------------|-------------------------|-------------------|----------------------------------------------------------------------------------------------------------------------------------------------------------|
| Pawar 2019 (101) | Combined TCZ    | 16,074     | 18       | 0.13/100 PY (0.07;0.20) | NR                      | 0.99 (0.55; 1.79) | index year, demographics, comorbid conditions, combined comorbidity index, claims-based index of RA severity index, use of DMARDs (during all available) |

|                         |                |        |     |                            |    |                   |                                                                                                                                                                                                                                                                                   |
|-------------------------|----------------|--------|-----|----------------------------|----|-------------------|-----------------------------------------------------------------------------------------------------------------------------------------------------------------------------------------------------------------------------------------------------------------------------------|
|                         | Combined TNF-i | 33,109 | 37  | NR                         | NR | REF               | data) and other prescription drugs including GC, NSAIDs and analgesics, use of prophylactic antibiotics/antivirals, vaccination, history of any invasive procedures or surgery; cancer screening tests; physician orders of outpatient laboratory tests for acute phase reactants |
|                         | Combined ABA   | 10,414 | NR  | 0.13/100 PY (0.09;0.17)    | NR | NR                |                                                                                                                                                                                                                                                                                   |
| Rutherford 2018 b (107) | TNF-i          | 16,742 | 114 | 134 /100 000 PY (111; 161) | NR | REF               | age, gender, disease severity and duration, smoking, seropositivity, polypharmacy (as a surrogate for comorbidity)                                                                                                                                                                |
|                         | RTX            | 5,072  | 25  | 146/100 000 PY (98; 217)   | NR | 0.96 (0.62; 1.50) |                                                                                                                                                                                                                                                                                   |
|                         | TCZ            | 2,171  | 3   | 78/100 000 PY (25; 241)    | NR | 0.52 (0.17; 1.65) |                                                                                                                                                                                                                                                                                   |
| Leon 2019 (108)         | ADA            | 28.4*  | 11  | 26.3/1000 PY (8.4; 81.6)   | NR | NR                |                                                                                                                                                                                                                                                                                   |
|                         | ETN            | 23.5`* | 9   | 20.7/1000 PY (10.7; 39.8)  | NR | NR                |                                                                                                                                                                                                                                                                                   |
|                         | IFX            | 7*     | 3   | 26.3/1000 PY (8.4;81.6)    | NR | NR                |                                                                                                                                                                                                                                                                                   |
|                         | RTX            | 17.3*  | 9   | 40.3/1000 PY (20.9; 77.4)  | NR | NR                |                                                                                                                                                                                                                                                                                   |
|                         | ABA            | 6.2*   | 2   | 22.5/1000 PY (5.6; 90)     | NR | NR                |                                                                                                                                                                                                                                                                                   |
|                         | CZP            | 10.6*  | 2   | 23.2/1000 PY (5.8; 92.8)   | NR | NR                |                                                                                                                                                                                                                                                                                   |

|                                              |     |      |   |                              |    |    |  |
|----------------------------------------------|-----|------|---|------------------------------|----|----|--|
|                                              | TCZ | 5.3* | 1 | 15.1/1000 PY<br>(2.1; 107.6) | NR | NR |  |
|                                              | GOL | 1.7* | 0 | -                            | NR | NR |  |
| * data reported as percentage of total n=441 |     |      |   |                              |    |    |  |

#### 4.3.3: Tuberculosis: Comparison between IL-6R/L blockers and different bDMARDs (observational studies/randomized controlled trials)

Table S4.3.3.1: Baseline characteristics of observational studies investigating IL-6R/L blockers regarding tuberculosis.

| Study                   | Registry                                                                           | Inclusion criteria                                                                                                                                                                                                                                                           | Exclusion criteria                                                                                                                                               |
|-------------------------|------------------------------------------------------------------------------------|------------------------------------------------------------------------------------------------------------------------------------------------------------------------------------------------------------------------------------------------------------------------------|------------------------------------------------------------------------------------------------------------------------------------------------------------------|
| Pawar 2019 (101)        | US health care claims databases: Medicare, IMS PharMetrics Plus, Truven MarketScan | RA (ICD9/10 codes) patients treated with TCZ, ABA or TNF-i; $\geq 1$ different biologic agent or tofacitinib any time prior                                                                                                                                                  | nursing home residents and patients with pre-existing malignancy prior and at the index date; RTX users                                                          |
| Rutherford 2018 b (107) | BSRBR-RA                                                                           | RA patients treated with bDMARDs                                                                                                                                                                                                                                             | a priori decision by authors to exclude tuberculosis (TB) from main analysis                                                                                     |
| Lim 2017 (109)          | Taichung Veterans General Hospital, Taiwan                                         | RA (ICD9 codes), $\geq 18$ years old, first bDMARDs or tDMARDs; in Taiwan, latent TB screening and treatment policy before initiation of biologics commenced in 2012. As per TB risk management plan, every patient must undergo TB screening before initiation of biologics | concomitant diagnosis of psoriatic arthritis, spondyloarthritis, inflammatory bowel diseases or Behcet's disease. Patients who had used bDMARDs or tDMARDs prior |

|                 |                                                              |                                                                                                                                                                                                                                                                                                                                                                                                                                                                                                                          |                                               |
|-----------------|--------------------------------------------------------------|--------------------------------------------------------------------------------------------------------------------------------------------------------------------------------------------------------------------------------------------------------------------------------------------------------------------------------------------------------------------------------------------------------------------------------------------------------------------------------------------------------------------------|-----------------------------------------------|
| Wang 2019 (110) | multiple medical centers, computerized database in Hong Kong | Rheumatology disease (RA, ankylosing spondylitis, psoriatic arthritis, Felty's syndrome and other miscellaneous); IBD (ulcerative colitis, Crohn's disease and undetermined colitis); and dermatology disease (psoriasis); <i>it is possible that some TB cases who had taken anti-TB treatment in private institutions were missed, and this could result in an underestimation of the IR of TB (all patients should undergo latent TB screening prior to biologic initiation based on Hong Kong's local guideline)</i> | two or more of the mentioned disease subtypes |
|-----------------|--------------------------------------------------------------|--------------------------------------------------------------------------------------------------------------------------------------------------------------------------------------------------------------------------------------------------------------------------------------------------------------------------------------------------------------------------------------------------------------------------------------------------------------------------------------------------------------------------|-----------------------------------------------|

Table S4.3.3.2: Risk of bias analysis (Newcastle-Ottawa Scale [NOS] for Cohort studies)

| Study           | Representativeness of exposed cohort | Selection of non-exposed cohort | Ascertainment of exposure | Outcome not presented at start | Comparability of cohort | Assessment of outcome | Follow-up length | Adequacy of follow-up | Summary |
|-----------------|--------------------------------------|---------------------------------|---------------------------|--------------------------------|-------------------------|-----------------------|------------------|-----------------------|---------|
| Lim 2017 (109)  | Low                                  | Low                             | High                      | Low                            | Low                     | High                  | Low              | Low                   | High    |
| Wang 2019 (110) | Low                                  | Low                             | Low                       | Low                            | Low                     | Low                   | Low              | Low                   | Low     |

Table S4.3.3.3: Safety outcomes of observational studies regarding tuberculosis.

| Study                   | Treatment group | N patients | N events | Incidence rate (95% CI) | age/gender aHR (I vs C) | aHR (I vs C)      | Adjusted for                                                                                                                                                                                                                                                                                                                                                                                                                              |
|-------------------------|-----------------|------------|----------|-------------------------|-------------------------|-------------------|-------------------------------------------------------------------------------------------------------------------------------------------------------------------------------------------------------------------------------------------------------------------------------------------------------------------------------------------------------------------------------------------------------------------------------------------|
| Pawar 2019 (101)        | Combined TCZ    | 16,074     | 0        | 0.00/100 PY (0.00;0.00) | NR                      | NAP               | index year, demographics, comorbid conditions, combined comorbidity index, claims-based index of RA severity index, use of DMARDs (during all available data) and other prescription drugs including GC, NSAIDs and analgesics, use of prophylactic antibiotics/antivirals, vaccination, history of any invasive procedures or surgery; cancer screening tests; physician orders of outpatient laboratory tests for acute phase reactants |
|                         | Combined TNF-i  | 33,109     | 0        | 0.00/100 PY (0.00;0.00) | NR                      | NR                |                                                                                                                                                                                                                                                                                                                                                                                                                                           |
|                         | Combined ABA    | 10,414     | NR       | NR                      | NR                      | REF               |                                                                                                                                                                                                                                                                                                                                                                                                                                           |
| Rutherford 2018 b (107) | TNF-i           | 16,742     | 56       | 65/100,000 PY (50;85)   | NR                      | REF               | age, gender, disease severity and duration, smoking, seropositivity, polypharmacy (as a surrogate for comorbidity)                                                                                                                                                                                                                                                                                                                        |
|                         | RTX             | 5,072      | 2        | 12/100,000 PY (3;46)    | NR                      | 0.16 (0.04; 0.67) |                                                                                                                                                                                                                                                                                                                                                                                                                                           |
|                         | TCZ             | 2,171      | 1        | 26/100,000 PY (4;183)   | NR                      | 0.35 (0.05; 2.55) |                                                                                                                                                                                                                                                                                                                                                                                                                                           |
| Lim 2017 (109)          | ETN             | 443        | 13       | 889.3/100,000 PY        | REF                     | NR                | age, gender                                                                                                                                                                                                                                                                                                                                                                                                                               |
|                         | ADA             | 332        | 11       | 1055.6/100,000 PY       | 1.27 (0.76;2.13)*       | NR                |                                                                                                                                                                                                                                                                                                                                                                                                                                           |
|                         | GOL             | 60         | 0        | 0                       | NAP                     | NR                |                                                                                                                                                                                                                                                                                                                                                                                                                                           |

|                                                                                                                                                                                                                    |                |      |    |                   |     |                     |                                                                                                                                        |
|--------------------------------------------------------------------------------------------------------------------------------------------------------------------------------------------------------------------|----------------|------|----|-------------------|-----|---------------------|----------------------------------------------------------------------------------------------------------------------------------------|
|                                                                                                                                                                                                                    | TCZ            | 31   | 0  | 0                 | NAP | NR                  |                                                                                                                                        |
|                                                                                                                                                                                                                    | ABA            | 74   | 0  | 0                 | NAP | NR                  |                                                                                                                                        |
|                                                                                                                                                                                                                    | TOF            | 11   | 0  | 0                 | NAP | NR                  |                                                                                                                                        |
| Wang 2019<br>(110)                                                                                                                                                                                                 | Combined TNF-i | 2840 | 57 | 956.1/100,000 PY  | NR  | 4.34 (1.31;14.39)** | age, sex, comorbidity and concurrent use of immunosuppressant when comparing risk of TB among different disease subtypes and biologics |
|                                                                                                                                                                                                                    | ABA            | 147  | 0  | 0/100,000 PY      | NR  | NR                  |                                                                                                                                        |
|                                                                                                                                                                                                                    | RTX            | 167  | 2  | 1404.5/100,000 PY | NR  | NR                  |                                                                                                                                        |
|                                                                                                                                                                                                                    | TCZ            | 371  | 4  | 633.8/100,000 PY  | NR  | NR                  |                                                                                                                                        |
|                                                                                                                                                                                                                    | TOF            | 38   | 0  | 0/100,000 PY      | NR  | NR                  |                                                                                                                                        |
|                                                                                                                                                                                                                    | UST            | 19   | 0  | 0/100,000 PY      | NR  | NR                  |                                                                                                                                        |
| <p>TOF: tofacitinib; UST: ustekinumab<br/> * TB HR for ADA was 1.87 (95% CI:1.27;2.73) in patients without TB infection history<br/> ** aHR: risk of TB with TNF inhibitor vs. a non-TNF biologic as reference</p> |                |      |    |                   |     |                     |                                                                                                                                        |



#### 4.3.4: Pneumocystis jirovecii pneumonia: Comparison between IL-6R/L blockers and different bDMARDs (observational studies/randomized controlled trials)

Table S4.3.4.1: Baseline characteristics of observational studies investigating IL-6R/L blockers regarding pneumocystis jirovecii pneumonia.

| Study                   | Registry | Inclusion criteria               | Exclusion criteria                                                           |
|-------------------------|----------|----------------------------------|------------------------------------------------------------------------------|
| Rutherford 2018 b (107) | BSRBR-RA | RA patients treated with bDMARDs | a priori decision by authors to exclude tuberculosis (TB) from main analysis |

Table S4.3.4.2: Safety outcomes of observational studies regarding pneumocystis jirovecii pneumonia.

| Study                   | Treatment group | N patients | N events | Incidence rate (95% CI) | age/gender aHR (I vs C) | aHR (I vs C)  | Adjusted for                                                                                                       |
|-------------------------|-----------------|------------|----------|-------------------------|-------------------------|---------------|--------------------------------------------------------------------------------------------------------------------|
| Rutherford 2018 b (107) | TNF-i           | 16,742     | 15       | NR                      | NR                      | REF           | age, gender, disease severity and duration, smoking, seropositivity, polypharmacy (as a surrogate for comorbidity) |
|                         | RTX             | 5,072      | 9        | 52/100,000 PY           | NR                      | 3.2 (1.4;7.5) |                                                                                                                    |
|                         | TCZ             | 2,171      | NR       | NR                      | NR                      | NR            |                                                                                                                    |

#### 4.3.5: Herpes zoster: Comparison between IL-6R/L blockers and different bDMARDs (observational studies/randomized controlled trials)

Table S4.3.5.1: Baseline characteristics of observational studies investigating IL-6R/L blockers regarding herpes zoster.

| Study             | Registry                                                                           | Inclusion criteria                                                                                                          | Exclusion criteria                                                                                                                                                                                                                                                                                                                                                              |
|-------------------|------------------------------------------------------------------------------------|-----------------------------------------------------------------------------------------------------------------------------|---------------------------------------------------------------------------------------------------------------------------------------------------------------------------------------------------------------------------------------------------------------------------------------------------------------------------------------------------------------------------------|
| Pawar 2019 (101)  | US health care claims databases: Medicare, IMS PharMetrics Plus, Truven MarketScan | RA (ICD9/10 codes) patients treated with TCZ, ABA or TNF-i; $\geq 1$ different biologic agent or tofacitinib any time prior | nursing home residents and patients with pre-existing malignancy prior and at the index date; RTX users                                                                                                                                                                                                                                                                         |
| Curtis 2016 (111) | US health care claims databases: Medicare, MarketScan                              | RA (ICD9 codes) patients, first use of TOFA or bDMARD                                                                       | prior diagnosis of herpes infection (ICD 9 codes), any diagnostic of mucocutaneous ulcers (ICD9), or any prior use of acyclovir, valacyclovir, or famciclovir. Diagnosis for ankylosing spondylitis, psoriasis, psoriatic arthritis, or IBD; any cancer diagnosis, other nonmelanoma skin cancer                                                                                |
| Yun 2015 (112)    | US health care claims database: Medicare                                           | RA (ICD9 codes) patients, history of prior biologic agent use                                                               | diagnosis of cancer or other autoimmune diseases (i.e., psoriatic arthritis, psoriasis, ankylosing spondylitis, or inflammatory bowel disease); patients who used antiviral medication (famciclovir, aciclovir, or valaciclovir) during the 3 months before the index date or who had a diagnosis code of HZ at any time before the index date (not just the 12-month baseline) |

Table S4.3.5.2: Risk of bias analysis (Newcastle-Ottawa Scale [NOS] for Cohort studies)

| Study             | Representativeness of exposed cohort | Selection of non-exposed cohort | Ascertainment of exposure | Outcome not presented at start | Comparability of cohort | Assessment of outcome | Follow-up length | Adequacy of follow-up | Summary |
|-------------------|--------------------------------------|---------------------------------|---------------------------|--------------------------------|-------------------------|-----------------------|------------------|-----------------------|---------|
| Curtis 2016 (111) | Low                                  | Low                             | High                      | Low                            | Low                     | High                  | Low              | Low                   | High    |
| Yun 2015 (112)    | Low                                  | Low                             | High                      | Low                            | Low                     | High                  | Low              | Low                   | High    |

Table S4.3.5.3: Safety outcomes of observational studies regarding herpes zoster.

| Study            | Treatment group | N patients | N events | Incidence rate (95% CI) | age/gender aHR (I vs C) | aHR (I vs C)      | Adjusted for                                                                                                                                                                                                                                                                                                                                                                                                                              |
|------------------|-----------------|------------|----------|-------------------------|-------------------------|-------------------|-------------------------------------------------------------------------------------------------------------------------------------------------------------------------------------------------------------------------------------------------------------------------------------------------------------------------------------------------------------------------------------------------------------------------------------------|
| Pawar 2019 (101) | Combined TCZ    | 16,074     | 15       | 0.11/100 PY (0.06;0.17) | NR                      | 0.90 (0.48; 1.69) | index year, demographics, comorbid conditions, combined comorbidity index, claims-based index of RA severity index, use of DMARDs (during all available data) and other prescription drugs including GC, NSAIDs and analgesics, use of prophylactic antibiotics/antivirals, vaccination, history of any invasive procedures or surgery; cancer screening tests; physician orders of outpatient laboratory tests for acute phase reactants |
|                  | Combined TNF-i  | 33,109     | 33       | 0.11/100 PY (0.07;0.15) | NR                      | REF               |                                                                                                                                                                                                                                                                                                                                                                                                                                           |
|                  | Combined ABA    | 10,414     | NR       | NR                      | NR                      | NR                |                                                                                                                                                                                                                                                                                                                                                                                                                                           |

|                    |      |        |     |                            |    |                   |                                                                                                                                                                                                                                                                                                      |
|--------------------|------|--------|-----|----------------------------|----|-------------------|------------------------------------------------------------------------------------------------------------------------------------------------------------------------------------------------------------------------------------------------------------------------------------------------------|
| Curtis 2016 (111)* | ADA  | NR     | NR  | 1.95/100 PY<br>(1.65;2.31) | NR | 1.00 (0.80; 1.25) | age, gender, GC, MTX, number of biologics, prior hospitalized infection, prior hospitalization for other reasons, prior outpatient infection (other than varicella), zoster vaccination                                                                                                              |
|                    | CZP  | NR     | NR  | 2.55/100 PY<br>(2.04;3.20) | NR | 1.14 (0.87; 1.48) |                                                                                                                                                                                                                                                                                                      |
|                    | ETN  | NR     | NR  | 2.08/100 PY<br>(1.77;2.45) | NR | 1.06 (0.85; 1.32) |                                                                                                                                                                                                                                                                                                      |
|                    | GOL  | NR     | NR  | 2.12/100 PY<br>(1.53;2.94) | NR | 1.09 (0.76; 1.57) |                                                                                                                                                                                                                                                                                                      |
|                    | IFX  | NR     | NR  | 2.71/100 PY<br>(2.33;3.08) | NR | 1.17 (0.97; 1.43) |                                                                                                                                                                                                                                                                                                      |
|                    | RXT  | 4,785  | NR  | 2.67/100 PY<br>(2.22;3.22) | NR | 1.12 (0.89; 1.41) |                                                                                                                                                                                                                                                                                                      |
|                    | TCZ  | 6,266  | NR  | 2.48/100 PY<br>(2.07;2.98) | NR | 1.12 (0.88; 1.42) |                                                                                                                                                                                                                                                                                                      |
|                    | TOFA | 1,746  | NR  | 3.87/100 PY<br>(2.82;5.32) | NR | 2.01 (1.40; 2.88) |                                                                                                                                                                                                                                                                                                      |
|                    | ABA  | 11,434 | NR  | 2.33/100 PY<br>(2.04;2.67) | NR | REF               |                                                                                                                                                                                                                                                                                                      |
| Yun 2015 (112)     | ABA  | NR     | 142 | 1.87/100 PY<br>(1.58;2.20) | NR | REF               | age, sex, race, oral glucocorticoids use during baseline, methotrexate use during baseline, number of hospitalizations during baseline, previous biologic agent type, disabled status, number of hospitalizations during baseline, and HZ vaccination before new biologic agent treatment initiation |
|                    | RTX  | NR     | 82  | 2.27/100 PY<br>(1.83;2.82) | NR | 1.20 (0.88;1.63)  |                                                                                                                                                                                                                                                                                                      |
|                    | TCZ  | NR     | 18  | 2.15/100 PY<br>(1.35;3.40) | NR | 1.05 (0.60;1.84)  |                                                                                                                                                                                                                                                                                                      |
|                    | ADA  | NR     | 46  | 1.74/100 PY<br>(1.31;2.33) | NR | 1.04 (0.72;1.51)  |                                                                                                                                                                                                                                                                                                      |

|                                                                                                                                        |             |    |     |                            |    |                               |
|----------------------------------------------------------------------------------------------------------------------------------------|-------------|----|-----|----------------------------|----|-------------------------------|
|                                                                                                                                        | CZP         | NR | 19  | 2.45/100 PY<br>(1.57;3.85) | NR | 1.30 (0.77;2.23)              |
|                                                                                                                                        | ETN         | NR | 48  | 2.15/100 PY<br>(1.62;2.86) | NR | 1.26 (0.87;1.81)              |
|                                                                                                                                        | GOL         | NR | 11  | 1.61/100 PY<br>(0.89;2.91) | NR | 0.91 (0.47;1.76)              |
|                                                                                                                                        | IFX         | NR | 57  | 1.82/100 PY<br>(1.40;2.36) | NR | 0.98 (0.69;1.39)              |
|                                                                                                                                        | MTX yes     | NR | 251 | 1.94/100 PY<br>(1.67;2.26) | NR | REF <sup>a</sup>              |
|                                                                                                                                        | MTX no      | NR | 172 | 1.98/100 PY<br>(1.75;2.24) | NR | 1.07 (0.88–1.29) <sup>a</sup> |
|                                                                                                                                        | No GC       | NR | 128 | 1.50/100 PY<br>(1.26;1.78) | NR | REF <sup>b</sup>              |
|                                                                                                                                        | ≤7.5mg/d GC | NR | 209 | 2.12/100 PY<br>(1.85;2.43) | NR | 1.55 (1.25;1.93) <sup>b</sup> |
|                                                                                                                                        | >7.5mg/d GC | NR | 86  | 2.74/100 PY<br>(2.22;3.39) | NR | 2.35 (1.81;3.04) <sup>b</sup> |
| <p>* Glucocorticoids:<br/> ≤7.5 mg/day vs. 0 mg/day: HR: 1.05 (0.91; 1.20)<br/> &gt;7.5 mg/day vs. 0 mg/day: HR: 1.40 (1.19; 1.65)</p> |             |    |     |                            |    |                               |

#### 4.4. Malignancies

##### 4.4.1: All types of cancer: Comparison between IL-6R/L blockers and different bDMARDs (observational studies/randomized controlled trials)

Table S4.4.1.1: Baseline characteristics of observational studies investigating IL-6R/L blockers regarding all types of cancer (excluding NMSC).

| Study               | Registry                                                                                                                                                       | Inclusion criteria                                                                                      | Exclusion criteria                                                                                    |
|---------------------|----------------------------------------------------------------------------------------------------------------------------------------------------------------|---------------------------------------------------------------------------------------------------------|-------------------------------------------------------------------------------------------------------|
| Wadström 2017 (113) | Swedish Rheumatology Quality of Care Register (SRQ)/ARTIS, Swedish Patient Register Swedish Cancer Register Prescribed Drug Register Total Population Register | RA patients treated with TNF-i, non-TNF-i; bDMARD-naive patients with csDMARDs                          | juvenile idiopathic arthritis, systemic lupus erythematosus, psoriatic arthritis, spondyloarthropathy |
| Kim 2019 (114)      | US health care claims databases: Medicare, IMS PharMetrics Plus, Truven MarketScan                                                                             | RA (ICD9/10 codes) patients treated with TCZ or TNF-i; ≥1 different biologic agent or tofacitinib prior | nursing home residents, patients with preexisting malignancies at baseline, RTX users                 |

Table S4.4.1.2: Risk of bias analysis (Newcastle-Ottawa Scale [NOS] for Cohort studies)

| Study               | Representativeness of exposed cohort | Selection of non-exposed cohort | Ascertainment of exposure | Outcome not presented at start | Comparability of cohort | Assessment of outcome | Follow-up length | Adequacy of follow-up | Summary |
|---------------------|--------------------------------------|---------------------------------|---------------------------|--------------------------------|-------------------------|-----------------------|------------------|-----------------------|---------|
| Wadström 2017 (113) | Low                                  | Low                             | Low                       | Low                            | Low                     | Low                   | Low              | Low                   | Low     |
| Kim 2019 (114)      | Low                                  | Low                             | High                      | Low                            | Low                     | High                  | Low              | Low                   | High    |

Table S4.4.1.3: Safety outcomes of observational studies regarding all types of cancer (invasive solid or hematologic malignant neoplasm excluding NMSC).

| Study               | Treatment group | N patients | N events | Incidence rate (95% CI) | age/gender aHR (I vs C) | aHR (I vs C)      |                   | Adjusted for                                                                                                                                                                                                                                                                                                                                                 |
|---------------------|-----------------|------------|----------|-------------------------|-------------------------|-------------------|-------------------|--------------------------------------------------------------------------------------------------------------------------------------------------------------------------------------------------------------------------------------------------------------------------------------------------------------------------------------------------------------|
| Wadström 2017 (113) | TCZ             | 1,798      | 50       | 959/100,000 PY          | 0.87 (0.66;1.16)        | 0.89 (0.67; 1.18) | 1.12 (0.81; 1.54) | age, sex, and start-year, comorbidities, educational level, number of hospitalizations and days spent in inpatient care, use of GCs, use of NSAIDs at baseline, number of prescription drugs at baseline, and sick leave and disability year before cohort entry; disease duration, DAS28-CRP, CRP, erythrocyte sedimentation rate, HAQ, previous bDMARD use |
|                     | ABA             | 2,021      | 61       | 1026/100,000 PY         | 0.88 (0.68;1.13)        | 0.88 (0.68; 1.14) | 1.10 (0.82; 1.48) |                                                                                                                                                                                                                                                                                                                                                              |
|                     | RTX             | 3,586      | 141      | 1074/100,000 PY         | 0.86 (0.72;1.02)        | 0.86 (0.73; 1.03) | 1.06 (0.86; 1.30) |                                                                                                                                                                                                                                                                                                                                                              |

|                |                       |         |       |                             |                  |                   |     |                                                                                              |
|----------------|-----------------------|---------|-------|-----------------------------|------------------|-------------------|-----|----------------------------------------------------------------------------------------------|
|                | TNF-i (first bDMARD)  | 10,782  | 478   | 978/100,000 PY              | 0.92 (0.84;1.01) | 0.93 (0.85; 1.01) | REF |                                                                                              |
|                | TNF-i (second bDMARD) | 4,347   | 169   | 917/100,000 PY              | 0.88 (0.76;1.03) | 0.89 (0.76; 1.04) | NR  |                                                                                              |
|                | csDMARD               | 46,610  | 3,260 | 1,328/100,000 PY            | REF              | REF               | NR  |                                                                                              |
|                | General population    | 107,491 | 4,193 | 953/100,000 PY              | 0.90 (0.82;0.99) | NAP               | NR  |                                                                                              |
| Kim 2019 (114) | Combined TCZ          | 13,102  | 162   | 14.77/1000 PY (12.49;17.04) | NR               | 0.96 (0.79, 1.17) |     | sex, age, baseline use of MTX, baseline use of GC, and receipt of any cancer screening tests |
|                | Combined TNF-i        | 26,727  | 322   | 14.60/1000 PY (13.00;16.19) | NR               | REF               |     |                                                                                              |



#### 4.4.2: Invasive solid cancer: Comparison between IL-6R/L blockers and different bDMARDs (observational studies/randomized controlled trials)

Table S4.4.2.1: Baseline characteristics of observational studies investigating IL-6R/L blockers regarding invasive solid cancer.

| Study               | Registry                                                                                                                                                       | Inclusion criteria                                                             | Exclusion criteria                                                                                    |
|---------------------|----------------------------------------------------------------------------------------------------------------------------------------------------------------|--------------------------------------------------------------------------------|-------------------------------------------------------------------------------------------------------|
| Wadström 2017 (113) | Swedish Rheumatology Quality of Care Register (SRQ)/ARTIS, Swedish Patient Register Swedish Cancer Register Prescribed Drug Register Total Population Register | RA patients treated with TNF-i, non-TNF-i; bDMARD-naive patients with csDMARDs | juvenile idiopathic arthritis, systemic lupus erythematosus, psoriatic arthritis, spondyloarthropathy |

Table S4.4.2.2: Safety outcomes of observational studies regarding invasive solid cancer.

| Study               | Treatment group | N patients | N events | Incidence rate (95% CI) | age/gender aHR (I vs C) | aHR (I vs C)      |                   | Adjusted for                                                                                                                                                                                                                                                      |
|---------------------|-----------------|------------|----------|-------------------------|-------------------------|-------------------|-------------------|-------------------------------------------------------------------------------------------------------------------------------------------------------------------------------------------------------------------------------------------------------------------|
| Wadström 2017 (113) | TCZ             | 1,798      | 47       | 899/100,000 PY          | 0.92 (0.69;1.23)        | 0.95 (0.71; 1.27) | 1.14 (0.81; 1.59) | age, sex, and start-year, comorbidities, educational level, number of hospitalizations and days spent in inpatient care, use of GCs, use of NSAIDs at baseline, number of prescription drugs at baseline, and sick leave and disability year before cohort entry; |
|                     | ABA             | 2,021      | 54       | 903/100,000 PY          | 0.86 (0.66;1.13)        | 0.88 (0.67; 1.16) | 1.04 (0.76; 1.42) |                                                                                                                                                                                                                                                                   |

|  |                       |         |       |                  |                  |                   |                  |                                                                                            |
|--|-----------------------|---------|-------|------------------|------------------|-------------------|------------------|--------------------------------------------------------------------------------------------|
|  | RTX                   | 3,586   | 132   | 985/100,000 PY   | 0.88 (0.74;1.05) | 0.90 (0.75; 1.08) | 1.05 (0.84;1.31) | disease duration, DAS28-CRP, CRP, erythrocyte sedimentation rate, HAQ, previous bDMARD use |
|  | TNF-i (first bDMARD)  | 10,782  | 434   | 884/100,000 PY   | 0.94 (0.85;1.03) | 0.94 (0.86; 1.04) | REF              |                                                                                            |
|  | TNF-i (second bDMARD) | 4,347   | 153   | 827/100,000 PY   | 0.89 (0.76;1.05) | 0.91 (0.77; 1.07) | NR               |                                                                                            |
|  | csDMARD               | 46,610  | 2,910 | 1,175/100,000 PY | REF              | REF               | NR               |                                                                                            |
|  | General population    | 107,491 | 3,883 | 877/100,000 PY   | 0.93 (0.84;1.03) | NAP               | NR               |                                                                                            |

#### 4.4.3: Invasive hematologic cancer: Comparison between IL-6R/L blockers and different bDMARDs (observational studies/randomized controlled trials)

Table S4.4.3.1: Baseline characteristics of observational studies investigating IL-6R/L blockers regarding invasive hematologic cancer.

| Study               | Registry                                                                                    | Inclusion criteria                                                             | Exclusion criteria                                                                                    |
|---------------------|---------------------------------------------------------------------------------------------|--------------------------------------------------------------------------------|-------------------------------------------------------------------------------------------------------|
| Wadström 2017 (113) | Swedish Rheumatology Quality of Care Register (SRQ)/ARTIS, Swedish Patient Register Swedish | RA patients treated with TNF-i, non-TNF-i; bDMARD-naive patients with csDMARDs | juvenile idiopathic arthritis, systemic lupus erythematosus, psoriatic arthritis, spondyloarthropathy |

|  |                                                                    |  |  |
|--|--------------------------------------------------------------------|--|--|
|  | Cancer Register Prescribed Drug Register Total Population Register |  |  |
|--|--------------------------------------------------------------------|--|--|

Table S4.4.3.2: Safety outcomes of observational studies regarding invasive hematologic cancer.

| Study               | Treatment group       | N patients | N events | Incidence rate (95% CI) | age/gender aHR (I vs C) | aHR (I vs C)      |                   | Adjusted for                                                                                                                                                                                                                                                                                                                                                 |
|---------------------|-----------------------|------------|----------|-------------------------|-------------------------|-------------------|-------------------|--------------------------------------------------------------------------------------------------------------------------------------------------------------------------------------------------------------------------------------------------------------------------------------------------------------------------------------------------------------|
|                     |                       |            |          |                         |                         |                   |                   |                                                                                                                                                                                                                                                                                                                                                              |
| Wadström 2017 (113) | TCZ                   | 1,798      | 3        | 54/100,000 PY           | <5 events               | <5 events         | <5 events         | age, sex, and start-year, comorbidities, educational level, number of hospitalizations and days spent in inpatient care, use of GCs, use of NSAIDs at baseline, number of prescription drugs at baseline, and sick leave and disability year before cohort entry; disease duration, DAS28-CRP, CRP, erythrocyte sedimentation rate, HAQ, previous bDMARD use |
|                     | ABA                   | 2,021      | 9        | 141 /100,000 PY         | 1.07 (0.55;2.06)        | 1.04 (0.53; 2.03) | 1.82 (0.81; 4.05) |                                                                                                                                                                                                                                                                                                                                                              |
|                     | RTX                   | 3,586      | 17       | 114 /100,000 PY         | 0.78 (0.48;1.27)        | 0.74 (0.45; 1.22) | 1.12 (0.62; 2.04) |                                                                                                                                                                                                                                                                                                                                                              |
|                     | TNF-i (first bDMARD)  | 10,782     | 54       | 104 /100,000 PY         | 0.85 (0.65;1.10)        | 0.85 (0.65; 1.10) | REF               |                                                                                                                                                                                                                                                                                                                                                              |
|                     | TNF-i (second bDMARD) | 4,347      | 20       | 102/100,000 PY          | 0.85 (0.54;1.33)        | 0.84 (0.54; 1.32) | NR                |                                                                                                                                                                                                                                                                                                                                                              |
|                     | csDMARD               | 46,610     | 448      | 164/100,000 PY          | REF                     | REF               | NR                |                                                                                                                                                                                                                                                                                                                                                              |
|                     | General population    | 107,491    | 403      | 84/100,000 PY           | 0.71 (0.59;0.85)        | NAP               | NR                |                                                                                                                                                                                                                                                                                                                                                              |

#### 4.4.4: Non-Hodgkin's Lymphoma: Comparison between IL-6R/L blockers and different bDMARDs (observational studies/randomized controlled trials)

Table S4.4.4.1: Baseline characteristics of observational studies investigating IL-6R/L blockers regarding Non-Hodgkin's Lymphoma.

| Study               | Registry                                                                                   | Inclusion criteria                                                                                      | Exclusion criteria                                                                    |
|---------------------|--------------------------------------------------------------------------------------------|---------------------------------------------------------------------------------------------------------|---------------------------------------------------------------------------------------|
| Kim 2019 (114)      | US health care claims databases: Medicare, IMS PharMetrics Plus, Truven MarketScan         | RA (ICD9/10 codes) patients treated with TCZ or TNF-i; ≥1 different biologic agent or tofacitinib prior | nursing home residents, patients with preexisting malignancies at baseline, RTX users |
| Hellgren 2020 (115) | Swedish Rheumatology Quality Register (SRQ)/ARTIS; Swedish National Patient Register (NPR) | RA patients, ≥18 years of age treated with bDMARDs (TNF-i/non-TNF-i)                                    | patients diagnosed with SLE, JIA, AS                                                  |

Table S4.4.4.2: Risk of bias analysis (Newcastle-Ottawa Scale [NOS] for Cohort studies)

| Study               | Representativeness of exposed cohort | Selection of non-exposed cohort | Ascertainment of exposure | Outcome not presented at start | Comparability of cohort | Assessment of outcome | Follow-up length | Adequacy of follow-up | Summary |
|---------------------|--------------------------------------|---------------------------------|---------------------------|--------------------------------|-------------------------|-----------------------|------------------|-----------------------|---------|
| Hellgren 2020 (115) | Low                                  | Low                             | Low                       | Low                            | Low                     | High                  | Low              | Low                   | High    |

Table S4.4.4.3: Safety outcomes of observational studies regarding Non-Hodgkin's Lymphoma.

| Study                | Treatment group | N patients | N events | Incidence rate (95% CI)  | age/gender aHR (I vs C) | aHR (I vs C)      | Adjusted for                                                                                                                            |
|----------------------|-----------------|------------|----------|--------------------------|-------------------------|-------------------|-----------------------------------------------------------------------------------------------------------------------------------------|
| Kim 2019 (114)       | Combined TCZ    | 13,102     | 11       | 0.99/1000 PY (0.41;1.58) | NR                      | 1.31 (0.60, 2.88) | sex, age, baseline use of MTX, baseline use of GC, and receipt of any cancer screening tests                                            |
|                      | Combined TNF-i  | 26,727     | 22       | 0.91/1000 PY (0.53;1.28) | NR                      | REF               |                                                                                                                                         |
| Hellgren 2020 (115)* | ETN             | 6,384      | 17       | 51.9/100,000 PY          | NR                      | REF               | age, sex, educational level, number of previous bDMARDs and comorbidities until start of follow-up and DAS28 and HAQ at start of bDMARD |
|                      | ADA             | 3,806      | 15       | 69.2/100,000 PY          | NR                      | 1.02 (0.52;1.99)  |                                                                                                                                         |
|                      | IFX             | 3,257      | 9        | 51.6/100,000 PY          | NR                      | 0.64 (0.27;1.56)  |                                                                                                                                         |
|                      | CZP             | 1,644      | 2        | 34.4/100,000 PY          | NR                      | NR                |                                                                                                                                         |
|                      | GOL             | 1,577      | 3        | 57.8/100,000 PY          | NR                      | NR                |                                                                                                                                         |
|                      | ABA             | 2,115      | 7        | 95.3/100,000 PY          | NR                      | 1.61 (0.50;5.22)  |                                                                                                                                         |
|                      | RTX             | 3,188      | 3        | 20.8/100,000 PY          | NR                      | NR                |                                                                                                                                         |

|                                                                          |     |       |   |                     |    |    |  |
|--------------------------------------------------------------------------|-----|-------|---|---------------------|----|----|--|
|                                                                          | TCZ | 1,895 | 2 | 30.7/100,000<br>PY  | NR | NR |  |
|                                                                          | ANR | 83    | 1 | 243.8/100,000<br>PY | NR | NR |  |
| * reported data include different subtypes of lymphomas<br>ANR: anakinra |     |       |   |                     |    |    |  |

#### 4.4.5: Non melanoma skin cancer (NMSC): Comparison between IL-6R/L blockers and different bDMARDs (observational studies/randomized controlled trials)

Table S4.4.5.1: Baseline characteristics of observational studies investigating IL-6R/L blockers regarding NMSC.

| Study               | Registry                                                                                                                                                       | Inclusion criteria                                                             | Exclusion criteria                                                                                    |
|---------------------|----------------------------------------------------------------------------------------------------------------------------------------------------------------|--------------------------------------------------------------------------------|-------------------------------------------------------------------------------------------------------|
| Wadström 2017 (113) | Swedish Rheumatology Quality of Care Register (SRQ)/ARTIS, Swedish Patient Register Swedish Cancer Register Prescribed Drug Register Total Population Register | RA patients treated with TNF-i, non-TNF-i; bDMARD-naive patients with csDMARDs | juvenile idiopathic arthritis, systemic lupus erythematosus, psoriatic arthritis, spondyloarthropathy |

Table S4.4.5.2: Safety outcomes of observational studies regarding NMSC.

| Study               | Treatment group       | N patients | N events | Incidence rate (95% CI) | age/gender aHR (I vs C) | aHR (I vs C)      |                   | Adjusted for                                                                                                                                                                                                                                                                                                                                                 |
|---------------------|-----------------------|------------|----------|-------------------------|-------------------------|-------------------|-------------------|--------------------------------------------------------------------------------------------------------------------------------------------------------------------------------------------------------------------------------------------------------------------------------------------------------------------------------------------------------------|
|                     |                       |            |          |                         |                         |                   |                   |                                                                                                                                                                                                                                                                                                                                                              |
| Wadström 2017 (113) | TCZ                   | 1,798      | 5        | 90/100,000 PY           | 1.16 (0.48;2.80)        | 0.93 (0.39; 2.21) | 1.04 (0.39; 2.80) | age, sex, and start-year, comorbidities, educational level, number of hospitalizations and days spent in inpatient care, use of GCs, use of NSAIDs at baseline, number of prescription drugs at baseline, and sick leave and disability year before cohort entry; disease duration, DAS28-CRP, CRP, erythrocyte sedimentation rate, HAQ, previous bDMARD use |
|                     | ABA                   | 2,021      | 17       | 266/100,000 PY          | 2.98 (1.81;4.90)        | 2.15 (1.31; 3.52) | 2.12 (1.14; 3.95) |                                                                                                                                                                                                                                                                                                                                                              |
|                     | RTX                   | 3,586      | 24       | 159 /100,000 PY         | 1.38 (0.90;2.11)        | 1.01 (0.66; 1.55) | 1.05 (0.62; 1.77) |                                                                                                                                                                                                                                                                                                                                                              |
|                     | TNF-i (first bDMARD)  | 10,782     | 54       | 104 /100,000 PY         | 1.24 (0.95;1.62)        | 1.09 (0.84; 1.42) | REF               |                                                                                                                                                                                                                                                                                                                                                              |
|                     | TNF-i (second bDMARD) | 4,347      | 17       | 86/100,000 PY           | 1.05 (0.66;1.69)        | 0.86 (0.54; 1.39) | NR                |                                                                                                                                                                                                                                                                                                                                                              |
|                     | csDMARD               | 46,610     | 467      | 171/100,000 PY          | REF                     | REF               | NR                |                                                                                                                                                                                                                                                                                                                                                              |
|                     | General population    | 107,491    | 263      | 55/100,000 PY           | 0.64 (0.46;0.88)        | NAP               | NR                |                                                                                                                                                                                                                                                                                                                                                              |

#### 4.4.6: Melanoma: Comparison between IL-6R/L blockers and different bDMARDs (observational studies/randomized controlled trials)

Table S4.4.6.1: Baseline characteristics of observational studies investigating IL-6R/L blockers regarding invasive melanoma.

| Study               | Registry                                                                                                                                                       | Inclusion criteria                                                                                      | Exclusion criteria                                                                                    |
|---------------------|----------------------------------------------------------------------------------------------------------------------------------------------------------------|---------------------------------------------------------------------------------------------------------|-------------------------------------------------------------------------------------------------------|
| Wadström 2017 (113) | Swedish Rheumatology Quality of Care Register (SRQ)/ARTIS, Swedish Patient Register Swedish Cancer Register Prescribed Drug Register Total Population Register | RA patients treated with TNF-i, non-TNF-i; bDMARD-naive patients with csDMARDs                          | juvenile idiopathic arthritis, systemic lupus erythematosus, psoriatic arthritis, spondyloarthropathy |
| Kim 2019 (114)      | US health care claims databases: Medicare, IMS PharMetrics Plus, Truven MarketScan                                                                             | RA (ICD9/10 codes) patients treated with TCZ or TNF-i; ≥1 different biologic agent or tofacitinib prior | nursing home residents, patients with preexisting malignancies at baseline, RTX users                 |
| Mercer 2017 (116)   | EULAR RODS Study Group: AIR, ARTIS, ATTRA, BSRBR-RA, DANBIO, GISEA, Orenca and RA, RABBIT, REGistry— RoAcTEmra, Reuma.pt, SCQM                                 | RA patients treated with TNF-i, non-TNF-i; bDMARDs                                                      | history of invasive melanoma prior to registration                                                    |



Table S4.4.6.2: Risk of bias analysis (Newcastle-Ottawa Scale [NOS] for Cohort studies)

| Study             | Representativeness of exposed cohort | Selection of non-exposed cohort | Ascertainment of exposure | Outcome not presented at start | Comparability of cohort | Assessment of outcome | Follow-up length | Adequacy of follow-up | Summary |
|-------------------|--------------------------------------|---------------------------------|---------------------------|--------------------------------|-------------------------|-----------------------|------------------|-----------------------|---------|
| Mercer 2017 (116) | Low                                  | Low                             | Low                       | Low                            | Low                     | Low                   | Low              | Low                   | Low     |

Table S4.4.6.3: Safety outcomes of observational studies regarding invasive melanoma.

| Study               | Treatment group      | N patients | N events | Incidence rate (95% CI) | age/gender aHR (I vs C) | aHR (I vs C)      |                   | Adjusted for                                                                                                                                                                                                                                                                                                                                                 |
|---------------------|----------------------|------------|----------|-------------------------|-------------------------|-------------------|-------------------|--------------------------------------------------------------------------------------------------------------------------------------------------------------------------------------------------------------------------------------------------------------------------------------------------------------------------------------------------------------|
| Wadström 2017 (113) | TCZ                  | 1,798      | 3        | 54/100,000 PY           | <5 events               | <5 events         | <5 events         | age, sex, and start-year, comorbidities, educational level, number of hospitalizations and days spent in inpatient care, use of GCs, use of NSAIDs at baseline, number of prescription drugs at baseline, and sick leave and disability year before cohort entry; disease duration, DAS28-CRP, CRP, erythrocyte sedimentation rate, HAQ, previous bDMARD use |
|                     | ABA                  | 2,021      | 7        | 110/100,000 PY          | 1.33 (0.61;2.90)        | 1.43 (0.66; 3.09) | 2.39 (0.90; 6.33) |                                                                                                                                                                                                                                                                                                                                                              |
|                     | RTX                  | 3,586      | 9        | 60/100,000 PY           | 0.69 (0.36;1.35)        | 0.73 (0.38; 1.39) | 1.07 (0.47; 2.45) |                                                                                                                                                                                                                                                                                                                                                              |
|                     | TNF-i (first bDMARD) | 10,782     | 32       | 62/100,000 PY           | 0.85 (0.60;1.18)        | 0.84 (0.60; 1.18) | REF               |                                                                                                                                                                                                                                                                                                                                                              |

|                   |                       |         |     |                          |                  |                   |    |                                                                                              |
|-------------------|-----------------------|---------|-----|--------------------------|------------------|-------------------|----|----------------------------------------------------------------------------------------------|
|                   | TNF-i (second bDMARD) | 4,347   | 13  | 66/100,000 PY            | 0.92 (0.52;1.61) | 0.94 (0.53; 1.66) | NR |                                                                                              |
|                   | csDMARD               | 46,610  | 234 | 86/100,000 PY            | REF              | REF               | NR |                                                                                              |
|                   | General population    | 107,491 | 290 | 61/100,000 PY            | 0.84 (0.57;1.23) | NAP               | NR |                                                                                              |
| Kim 2019 (114)    | Combined TCZ          | 13,102  | 12  | 1.09/1000 PY (0.47;1.70) | NR               | 0.71 (0.36;1.40)  |    | sex, age, baseline use of MTX, baseline use of GC, and receipt of any cancer screening tests |
|                   | Combined TNF-i        | 26,727  | 322 | 1.36/1000 PY (0.90;1.82) | NR               | REF               |    |                                                                                              |
| Mercer 2017 (116) | TCZ                   | 2,606   | 4   | 4.1/1000 PY              | NR               | NR                |    | NAP                                                                                          |
|                   | ABA                   | 1,563   | 2   | 4.4/1000 PY              | NR               | NR                |    |                                                                                              |
|                   | RTX                   | 9,431   | 13  | 29/1000 PY               | NR               | NR                |    |                                                                                              |
|                   | TNF-i                 | 48,304  | 106 | 242/1000 PY              | NR               | NR                |    |                                                                                              |
|                   | bDMARD naive          | 68,411  | 160 | 300/1000 PY              | NR               | NR                |    |                                                                                              |

## 4.5. Gastrointestinal and hepatic events

### 4.5.1: Diverticulitis: Comparison between IL-6R/L blockers and different bDMARDs (observational studies/randomized controlled trials)

Table S4.5.1.1: Baseline characteristics of observational studies investigating IL-6R/L blockers regarding diverticulitis.

| Study                         | Registry                                                                                                                          | Inclusion criteria                                                                                                          | Exclusion criteria                                                                                      |
|-------------------------------|-----------------------------------------------------------------------------------------------------------------------------------|-----------------------------------------------------------------------------------------------------------------------------|---------------------------------------------------------------------------------------------------------|
| Pawar 2019 (101)              | US health care claims databases: Medicare, IMS PharMetrics Plus, Truven MarketScan                                                | RA (ICD9/10 codes) patients treated with TCZ, ABA or TNF-i; $\geq 1$ different biologic agent or tofacitinib any time prior | nursing home residents and patients with pre-existing malignancy prior and at the index date; RTX users |
| Rutherford 2018 a (100)       | BSRBR-RA (British)                                                                                                                | RA patients treated with bDMARDs                                                                                            | none                                                                                                    |
| Rempenault (EULAR 2020) (117) | French registries: AIR (Autoimmunity and Rituximab), ABA (Orencia and Rheumatoid Arthritis -ORA), TCZ (REGistry-RoActEmra-REGATE) | RA patients treated with RTX, TCZ or ABA                                                                                    | NR                                                                                                      |

Table S4.5.1.2: Risk of bias analysis (Newcastle-Ottawa Scale [NOS] for Cohort studies)

| Study                         | Representativeness of exposed cohort | Selection of non-exposed cohort | Ascertainment of exposure | Outcome not presented at start | Comparability of cohort | Assessment of outcome | Follow-up length | Adequacy of follow-up | Summary  |
|-------------------------------|--------------------------------------|---------------------------------|---------------------------|--------------------------------|-------------------------|-----------------------|------------------|-----------------------|----------|
| Rempenault (EULAR 2020) (117) | Abstract                             | Abstract                        | Abstract                  | Abstract                       | Abstract                | Abstract              | Abstract         | Abstract              | Abstract |

Table S4.5.1.3: Safety outcomes of observational studies regarding diverticulitis.

| Study            | Treatment group | N patients | N events | Incidence rate (95% CI)  | age/gender aHR (I vs C) | aHR (I vs C)     | Adjusted for                                                                                                                                                                                                                                                                                                                                                                                                                              |
|------------------|-----------------|------------|----------|--------------------------|-------------------------|------------------|-------------------------------------------------------------------------------------------------------------------------------------------------------------------------------------------------------------------------------------------------------------------------------------------------------------------------------------------------------------------------------------------------------------------------------------------|
| Pawar 2019 (101) | Combined TCZ    | 16,074     | 70       | 0.52/100 PY (0.40;0.64)  | NR                      | 2.34 (1.64;3.34) | index year, demographics, comorbid conditions, combined comorbidity index, claims-based index of RA severity index, use of DMARDs (during all available data) and other prescription drugs including GC, NSAIDs and analgesics, use of prophylactic antibiotics/antivirals, vaccination, history of any invasive procedures or surgery; cancer screening tests; physician orders of outpatient laboratory tests for acute phase reactants |
|                  | Combined TNF-i  | 33,109     | 61       | 0.21/100 PY (0.16; 0.26) | NR                      | REF              |                                                                                                                                                                                                                                                                                                                                                                                                                                           |
|                  | Combined ABA    | 10,414     | NR       | NR                       | NR                      | NR               |                                                                                                                                                                                                                                                                                                                                                                                                                                           |

|                                     |     |       |    |                            |    |                                     |                                                                                                                                                                                                                                                                                         |
|-------------------------------------|-----|-------|----|----------------------------|----|-------------------------------------|-----------------------------------------------------------------------------------------------------------------------------------------------------------------------------------------------------------------------------------------------------------------------------------------|
| Rutherford<br>2018 a (100)*         | ETN | 8,630 | NR | 0.5/100 PY<br>(0.40;0.63)  | NR | REF                                 | age, gender, DAS28-ESR, HAQ, disease duration, smoking, seropositivity, polypharmacy, baseline steroid usage                                                                                                                                                                            |
|                                     | IFX | 4,908 | NR | 0.51/100 PY<br>(0.38;0.68) | NR | 0.95 (0.66;1.38)                    |                                                                                                                                                                                                                                                                                         |
|                                     | ADA | 7,818 | NR | 0.38/100 PY<br>(0.29;0.50) | NR | 0.77 (0.54;1.11)                    |                                                                                                                                                                                                                                                                                         |
|                                     | RTX | 5,101 | NR | 0.58/100 PY<br>(0.41;0.81) | NR | 0.93 (0.61;1.42)                    |                                                                                                                                                                                                                                                                                         |
|                                     | TCZ | 2,174 | NR | 0.76/100 PY<br>(0.46;1.27) | NR | 1.45 (0.72;2.90)                    |                                                                                                                                                                                                                                                                                         |
|                                     | CZP | 1,446 | NR | 0.18/100 PY<br>(0.06;0.55) | NR | 0.51 (0.16;1.63)                    |                                                                                                                                                                                                                                                                                         |
| Rempenault<br>(EULAR 2020)<br>(117) | TCZ | 1,496 | 21 | 5.3/1000 PY                | NR | <u>TCZ vs RTX:</u><br>4.5 (2.6;7.6) | age, sex, history of diabetes and neoplasia, Charlson Comorbidity Index, number of previous csDMARDs and TNFi, history of TNFi, daily dose of GC at baseline, co-treatment with a csDMARDs, average DAS28 during follow-up, duration of RA, and exposure time to the considered bDMARDs |
|                                     | RTX | 1,986 | 10 | 1.6/1000 PY                | NR |                                     |                                                                                                                                                                                                                                                                                         |
|                                     | ABA | 1,019 | 10 | 4.2/1000 PY                | NR | <u>TCZ vs ABA:</u><br>3.4 (1.7;6.5) |                                                                                                                                                                                                                                                                                         |
| * any GI-infection                  |     |       |    |                            |    |                                     |                                                                                                                                                                                                                                                                                         |

#### 4.5.2: Gastrointestinal perforation (GIP): Comparison between IL-6R/L blockers and different bDMARDs (observational studies/randomized controlled trials)

Table S4.5.2.1: Baseline characteristics of observational studies investigating IL-6R/L blockers regarding GIP.

| Study                         | Registry                                                                                                                                                               | Inclusion criteria                                                                                                                                                                                                             | Exclusion criteria                                                                                                                                                |
|-------------------------------|------------------------------------------------------------------------------------------------------------------------------------------------------------------------|--------------------------------------------------------------------------------------------------------------------------------------------------------------------------------------------------------------------------------|-------------------------------------------------------------------------------------------------------------------------------------------------------------------|
| Monemi 2016 (118)             | US health care claims databases: Truven Health MarketScan Commercial Claims and Encounters (commercial), Medicare Supplemental and Coordination of Benefits (Medicare) | TCZ-IV RA clinical trial all-exposure population, global TCZ postmarketing safety database population, and a US healthcare claims database population of patients with RA, including patients who received TCZ, TNF-i, or ABA. | history of GIP, GI cancer, ulcerative colitis, or Crohn disease during the 12 months prior to the index date                                                      |
| Rempenault (EULAR 2020) (117) | French registries: AIR (Autoimmunity and Rituximab), ABA (Orencia and Rheumatoid Arthritis -ORA), TCZ (REGistry–RoAcTEmra-REGATE)                                      | RA patients treated with RTX, TCZ or ABA                                                                                                                                                                                       | NR                                                                                                                                                                |
| Strangfeld 2017 (119)         | RABBIT (German)                                                                                                                                                        | RA patients starting atreatment with a bDMARD, or csDMARD after failure of at least one csDMARD.                                                                                                                               | none                                                                                                                                                              |
| Barbulescu 2020 (120)         | SRQ/ARTIS                                                                                                                                                              | RA patients (ICD10 codes) treated with bDMARDs                                                                                                                                                                                 | history of any gastrointestinal perforation (upper GIP excluded from main analysis)                                                                               |
| Xie 2016 (121)                | US health care claims databases: Medicare, MarketScan                                                                                                                  | RA patients (ICD9 codes) ≥ 18 years, bDMARD or TOFA                                                                                                                                                                            | any prior diagnosis of GI-perforation (inpatient or outpatient) using all available previous data (minimum of 6 months), diagnosis of inflammatory bowel disease, |

|  |  |  |                                                          |
|--|--|--|----------------------------------------------------------|
|  |  |  | any cancer diagnosis, other than nonmelanoma skin cancer |
|--|--|--|----------------------------------------------------------|

Table S4.5.2.2: Risk of bias analysis (Newcastle-Ottawa Scale [NOS] for Cohort studies)

| Study                         | Representativeness of exposed cohort | Selection of non-exposed cohort | Ascertainment of exposure | Outcome not presented at start | Comparability of cohort | Assessment of outcome | Follow-up length | Adequacy of follow-up | Summary  |
|-------------------------------|--------------------------------------|---------------------------------|---------------------------|--------------------------------|-------------------------|-----------------------|------------------|-----------------------|----------|
| Monemi 2016 (118)             | Low                                  | Low                             | High                      | Low                            | Low                     | High                  | Low              | Low                   | High     |
| Rempenault (EULAR 2020) (117) | Abstract                             | Abstract                        | Abstract                  | Abstract                       | Abstract                | Abstract              | Abstract         | Abstract              | Abstract |
| Strangfeld 2017 (119)         | Low                                  | Low                             | Low                       | Low                            | Low                     | Low                   | Low              | Low                   | Low      |
| Barbulescu 2020 (120)         | Low                                  | Low                             | High                      | Low                            | Low                     | High                  | Low              | Low                   | High     |
| Xie 2016 (121)                | Low                                  | Low                             | High                      | Low                            | Low                     | High                  | Low              | Low                   | High     |

Table S4.5.2.3: Safety outcomes of observational studies regarding GIP.

| Study                          | Treatment group                | N patients | N events | Incidence rate (95% CI) <sup>a</sup> | age/gender aHR (I vs C) | aHR (I vs C)                                                                                                                                                                                                |                            | Adjusted for                                                                                                                                                                                                                                                                            |
|--------------------------------|--------------------------------|------------|----------|--------------------------------------|-------------------------|-------------------------------------------------------------------------------------------------------------------------------------------------------------------------------------------------------------|----------------------------|-----------------------------------------------------------------------------------------------------------------------------------------------------------------------------------------------------------------------------------------------------------------------------------------|
|                                |                                |            |          |                                      |                         |                                                                                                                                                                                                             |                            |                                                                                                                                                                                                                                                                                         |
| Monemi 2016 (118)*             | Combined TNF-i (ADA, ETN, IFX) | 17,333     | 10       | 0.6/1000 PY (0.3;1.2)                | NR                      | REF                                                                                                                                                                                                         | REF                        | age, sex, cumulative oral GC and NSAID use 180 days prior to index date, history of diverticulitis, number of prior biologics, and observed duration of RA                                                                                                                              |
|                                | TCZ                            | 3,602      | 6        | 1.8/1000 PY (0.7;4.0)                | NR                      | 2.2 (0.7;6.6) <sup>a</sup>                                                                                                                                                                                  | 2.2 (0.9;5.4) <sup>b</sup> |                                                                                                                                                                                                                                                                                         |
|                                | ABA                            | 6,320      | 5        | 0.8/1000 PY (0.3;2.0)                | NR                      | NR                                                                                                                                                                                                          | NR                         |                                                                                                                                                                                                                                                                                         |
| Monemi 2016 (118)**            | Combined TNF-i (ADA, ETN, IFX) | 17,333     | 5        | 0.4/1000 PY (0.1;0.8)                | NR                      | REF                                                                                                                                                                                                         | REF                        |                                                                                                                                                                                                                                                                                         |
|                                | TCZ                            | 3,602      | 5        | 1.5/1000 PY (0.5;3.6)                | NR                      | 4.0 (1.1;14.1) <sup>a</sup>                                                                                                                                                                                 | 3.1 (1.1;8.4) <sup>b</sup> |                                                                                                                                                                                                                                                                                         |
|                                | ABA                            | 6,320      | 5        | 0.8/1000 PY (0.3;2.0)                | NR                      | NR                                                                                                                                                                                                          | NR                         |                                                                                                                                                                                                                                                                                         |
| Rempenault (EULAR 2020) (117)* | TCZ                            | 1,496      | 9        | 2.3/1000 PY                          | NR                      | <u>TCZ vs RTX:</u><br>2.8 (1.5;5.1)<br><br><u>TCZ vs ABA:</u><br>5.4 (1.4;19.9)<br><br>older age (p=0.05), GCs at baseline (p=0.10) and average daily dose of GCs during follow-up (p=0.08) associated with |                            | age, sex, history of diabetes and neoplasia, Charlson Comorbidity Index, number of previous csDMARDs and TNFi, history of TNFi, daily dose of GC at baseline, co-treatment with a csDMARDs, average DAS28 during follow-up, duration of RA, and exposure time to the considered bDMARDs |
|                                | RTX                            | 1,986      | 8        | 1.3/1000 PY                          | NR                      |                                                                                                                                                                                                             |                            |                                                                                                                                                                                                                                                                                         |
|                                | ABA                            | 1,019      | 2        | 0.8/1000 PY                          | NR                      |                                                                                                                                                                                                             |                            |                                                                                                                                                                                                                                                                                         |



|                                   |                         |        |     |                             |    |                                 |                                         |                                                                         |
|-----------------------------------|-------------------------|--------|-----|-----------------------------|----|---------------------------------|-----------------------------------------|-------------------------------------------------------------------------|
|                                   |                         |        |     |                             |    | GIP only in univariate analysis |                                         |                                                                         |
| Rempenault (EULAR 2020) (117)***  | TCZ                     | 1,496  | 6   | 1.5/1000 PY                 | NR | TCZ vs RTX:<br>3.8(1.7;8.5)     |                                         |                                                                         |
|                                   | RTX                     | 1,986  | 3   | 0.5/1000 PY                 | NR |                                 |                                         |                                                                         |
|                                   | ABA                     | 1,019  | 2   | 0.8/1000 PY                 | NR | TCZ vs ABA:<br>6.9(1.9;25.4)    |                                         |                                                                         |
| Rempenault (EULAR 2020) (117)**** | TCZ                     | 1,496  | 3   | 0.7/1000 PY                 | NR | TCZ vs RTX:<br>1.4 (0.5;3.9)    |                                         |                                                                         |
|                                   | RTX                     | 1,986  | 5   | 0.8/1000 PY                 | NR |                                 |                                         |                                                                         |
|                                   | ABA                     | 1,019  | 0   | -                           | NR | TCZ vs ABA:<br>NAP              |                                         |                                                                         |
| Strangfeld 2017 (119)**           | csDMARD                 | 4,423  | 11  | 0.61/1000 PY<br>(0.3;1.1)   | NR | REF                             | age, sex, treatment with GCs and NSAIDs |                                                                         |
|                                   | TNF-i                   | 6,711  | 13  | 0.52/1000 PY<br>(0.3;0.9)   | NR | 1.04 (0.48;2.26)                |                                         |                                                                         |
|                                   | TCZ                     | 877    | 11  | 2.69/1000 PY<br>(1.4;4.8)   | NR | 4.48 (2.01;9.99)                |                                         |                                                                         |
|                                   | ABA                     | 371    | 1   | 0.51/1000 PY<br>(0.01;2.8)  | NR | NR                              |                                         |                                                                         |
|                                   | RTX                     | 928    | 1   | 0.2/1000 PY<br>(0.01;1.1)   | NR | NR                              |                                         |                                                                         |
|                                   | other bDMARDs (RTX+ABA) | NR     | NR  | NR                          | NR | 0.33 (0.08;1.44)                |                                         |                                                                         |
| Barbulescu 2020 (120)**           | General population      | 76,304 | 333 | 1.07/1000 PY<br>(0.95;1.33) | NR | REF                             | NAP <sup>c</sup>                        | Incidence rates per 1000 person-years were standardized for sex and age |

|                 |                  |         |     |                             |    |      |                                  |                                                                                                                                                                |
|-----------------|------------------|---------|-----|-----------------------------|----|------|----------------------------------|----------------------------------------------------------------------------------------------------------------------------------------------------------------|
|                 | Bionaive RA pat. | 62,532  | 570 | 1.60/1000 PY<br>(1.46;1.74) | NR | 1.02 | NAP <sup>c</sup>                 | (categorised in 10-years groups). HRs adjusted (by multivariable Cox regression) for demographic characteristics (age, sex) and cumulated use of GC            |
|                 | TNF-i            | 17,594  | 57  | 1.84/1000 PY<br>(1.38;3.63) | NR | 0.99 | REF <sup>c</sup>                 |                                                                                                                                                                |
|                 | ABA              | 2,527   | 13  | 3.32/1000 PY<br>(1.66;16.6) | NR | 1.41 | 1.07<br>(0.55;2.10) <sup>c</sup> |                                                                                                                                                                |
|                 | RTX              | 3,552   | 22  | 2.02/1000 PY<br>(1.26;5.65) | NR | 1.07 | 0.89<br>(0.50;1.58) <sup>c</sup> |                                                                                                                                                                |
|                 | TCZ              | 2,377   | 22  | 4.51/1000 PY<br>(2.68;10.4) | NR | 2.36 | 2.20<br>(1.28;3.79) <sup>c</sup> |                                                                                                                                                                |
| Xie 2016 (121)* | Combined TNF-i   | 115,044 | 109 | 0.83/1000 PY<br>(0.69;1.00) | NR | NR   |                                  | age, sex, race, concurrent medications, diabetes, peptic ulcer disease, gastroesophageal reflux disease, diverticulitis, and other gastrointestinal conditions |
|                 | ADA              | 34,787  | 28  | 0.97/1000 PY<br>(0.69;1.35) | NR | NR   |                                  |                                                                                                                                                                |
|                 | ETN              | 35,076  | 34  | 0.74/1000 PY<br>(0.51;1.07) | NR | NR   |                                  |                                                                                                                                                                |
|                 | IFX              | 28,722  | 38  | 0.85/1000 PY<br>(0.62;1.18) | NR | NR   |                                  |                                                                                                                                                                |
|                 | ABA              | 31,214  | 3   | 1.07/1000 PY<br>(0.79;1.45) | NR | NR   |                                  |                                                                                                                                                                |
|                 | RTX              | 4,391   | 43  | 0.73/1000 PY<br>(0.15;2.12) | NR | NR   |                                  |                                                                                                                                                                |
|                 | TCZ              | 11,705  | 16  | 1.55/1000 PY<br>(0.95;2.54) | NR | NR   |                                  |                                                                                                                                                                |
|                 | TOFA             | 4,755   | 3   | 0.86/1000 PY<br>(0.10;3.60) | NR | NR   |                                  |                                                                                                                                                                |

|                  |                |         |    |                             |    |                   |
|------------------|----------------|---------|----|-----------------------------|----|-------------------|
| Xie 2016 (121)** | Combined TNF-i | 115,044 | 59 | 0.46/1000 PY<br>(0.35;0.58) | NR | REF               |
|                  | ADA            | 34,787  | 17 | 0.48/1000 PY<br>(0.30;0.78) | NR | NR                |
|                  | ETN            | 35,076  | 18 | 0.47/1000 PY<br>(0.30;0.75) | NR | NR                |
|                  | IFX            | 28,722  | 20 | 0.46/1000 PY<br>(0.30;0.71) | NR | NR                |
|                  | ABA            | 31,214  | 30 | 0.76/1000 PY<br>(0.53;1.09) | NR | 1.41 (0.90;2.21)  |
|                  | RTX            | 4,391   | 2  | 0.48/1000 PY<br>(0.06;1.75) | NR | 1.72 (0.52;5.69)  |
|                  | TCZ            | 11,705  | 13 | 1.26/1000 PY<br>(0.73;2.18) | NR | 2.55 (1.33;4.88)  |
|                  | TOFA           | 4,755   | 2  | 0.86/1000 PY<br>(0.10;3.60) | NR | 3.24 (1.05;10.04) |
| Xie 2016 (121)#  | Combined TNF-i | 115,044 | 49 | 0.38/1000 PY<br>(0.28;0.50) | NR | NR                |
|                  | ADA            | 34,787  | 17 | 0.48/1000 PY<br>(0.30;0.78) | NR | NR                |
|                  | ETN            | 35,076  | 10 | 0.26/1000 PY<br>(0.14;0.49) | NR | NR                |
|                  | IFX            | 28,722  | 17 | 0.39/1000 PY<br>(0.24;0.63) | NR | NR                |
|                  | ABA            | 31,214  | 12 | 0.31/1000 PY<br>(0.17;0.54) | NR | NR                |

|                                                                                                                                                                                                                                                                                                                                                                                                                                                                                                                                                                                                                                                                                                                                                                                                                                                                                                                                                                                                                                                                                                                                                                                                                                                                                                                                                                                                                                                                                                                                                                                                                                                                                                                                                                           |      |        |   |                             |    |    |  |
|---------------------------------------------------------------------------------------------------------------------------------------------------------------------------------------------------------------------------------------------------------------------------------------------------------------------------------------------------------------------------------------------------------------------------------------------------------------------------------------------------------------------------------------------------------------------------------------------------------------------------------------------------------------------------------------------------------------------------------------------------------------------------------------------------------------------------------------------------------------------------------------------------------------------------------------------------------------------------------------------------------------------------------------------------------------------------------------------------------------------------------------------------------------------------------------------------------------------------------------------------------------------------------------------------------------------------------------------------------------------------------------------------------------------------------------------------------------------------------------------------------------------------------------------------------------------------------------------------------------------------------------------------------------------------------------------------------------------------------------------------------------------------|------|--------|---|-----------------------------|----|----|--|
|                                                                                                                                                                                                                                                                                                                                                                                                                                                                                                                                                                                                                                                                                                                                                                                                                                                                                                                                                                                                                                                                                                                                                                                                                                                                                                                                                                                                                                                                                                                                                                                                                                                                                                                                                                           | RTX  | 4,391  | 1 | 0.24/1000 PY<br>(0.01;1.35) | NR | NR |  |
|                                                                                                                                                                                                                                                                                                                                                                                                                                                                                                                                                                                                                                                                                                                                                                                                                                                                                                                                                                                                                                                                                                                                                                                                                                                                                                                                                                                                                                                                                                                                                                                                                                                                                                                                                                           | TCZ  | 11,705 | 3 | 0.29/1000 PY<br>(0.06;0.85) | NR | NR |  |
|                                                                                                                                                                                                                                                                                                                                                                                                                                                                                                                                                                                                                                                                                                                                                                                                                                                                                                                                                                                                                                                                                                                                                                                                                                                                                                                                                                                                                                                                                                                                                                                                                                                                                                                                                                           | TOFA | 4,755  | 0 | 0.00/1000 PY<br>(0.00;1.58) | NR | NR |  |
| <p>* any GIP<br/> ** lower GIP<br/> *** GIP due to diverticulitis (diverticular GIP)<br/> **** GIP due to another etiology<br/> # upper GIP</p> <p><sup>a</sup> specific definition: inpatient admissions with evidence of perforation based on presence of the word perforation in ICD-9-CM diagnosis for esophageal rupture; gastric, duodenal, peptic, or gastrojejunal ulcers; and unspecified GIP (appendicitis, diverticulitis, diverticulosis, or ischemic colitis associated with surgical GI procedures not included)</p> <p><sup>b</sup> sensitive definition: inpatient admissions with evidence of perforation based on (1) presence of the word perforation in ICD-9-CM diagnosis descriptions: esophageal rupture; gastric, duodenal, peptic, or gastrojejunal ulcers; appendicitis; and GI perforation of an unspecific location in the large intestine or (2) an ICD-9-CM diagnosis of diverticulitis, diverticulosis, or ischemic colitis plus a Current Procedural Terminology code for suture or resection of the small or large intestine</p> <p><sup>c</sup> lower GI perforations, crude and IPTW-adjusted incidence rates and contrasts between non-TNFi and TNFi. IPTW adjustment for age, sex, education level, year of treatment start, disease history (GI perforations, diverticular disease, intestinal vascular disease, inflammatory bowel disease, other GI disorders, diabetes, chronic obstructive pulmonary disease, hospitalised infections, cardiovascular disease, cancer, joint surgery, number of hospitalisations), RA duration, rheumatoid factor, erythrocyte sedimentation rate, CRP, DAS28-CRP, HAQ, comedication with MTX, other csDMARDs, selective COX2 inhibitors, NSAIDs, GC and cumulated use of GCs and of NSAIDs</p> |      |        |   |                             |    |    |  |

## 4.5.3: Hepatic events:

Table S4.5.3.1: Baseline characteristics of observational studies investigating IL-6R/L blockers regarding hepatic events.

| Study               | Registry                                                                                           | Inclusion criteria                                                                                                                                          | Exclusion criteria                                                                                                                                                                                                                                                                                                                                                                                                                                                                                                                              |
|---------------------|----------------------------------------------------------------------------------------------------|-------------------------------------------------------------------------------------------------------------------------------------------------------------|-------------------------------------------------------------------------------------------------------------------------------------------------------------------------------------------------------------------------------------------------------------------------------------------------------------------------------------------------------------------------------------------------------------------------------------------------------------------------------------------------------------------------------------------------|
| Koike 2014 (122)    | Post-marketing data, Japan                                                                         | RA patients treated with TCZ                                                                                                                                | NR                                                                                                                                                                                                                                                                                                                                                                                                                                                                                                                                              |
| Genovese 2017 (123) | Pooled data from RCTs (five phase 3 studies and one phase 4 study) and long-term extension studies | All-exposure population, RA patients who received $\geq 1$ dose of TCZ at 4 mg/kg, 8 mg/kg, or 10 mg/kg and who had $\geq 1$ postbaseline safety assessment | in all trials, pat. were excluded from entering the study if they had alanine aminotransferase (ALT) or aspartate aminotransferase (AST) levels $>1.5x$ the upper limit of normal (ULN) at screening. Patients with known active current or history of recurrent hepatitis B and C, history of alcohol or chemical abuse during the 6 months before screening, evidence of serious uncontrolled concomitant hepatic disease, or current hepatic disease as determined by the principal investigator were also excluded from the clinical trials |

Table S4.5.3.2: Risk of bias analysis (Newcastle-Ottawa Scale [NOS] for Cohort studies)

| Study               | Representativeness of exposed cohort | Selection of non-exposed cohort | Ascertainment of exposure | Outcome not presented at start | Comparability of cohort | Assessment of outcome | Follow-up length | Adequacy of follow-up | Summary  |
|---------------------|--------------------------------------|---------------------------------|---------------------------|--------------------------------|-------------------------|-----------------------|------------------|-----------------------|----------|
| Koike 2014 (122)    | Low                                  | Low                             | High                      | Low                            | High                    | High                  | Low              | Low                   | High     |
| Genovese 2017 (123) | Low                                  | Low                             | Low                       | Low                            | Low                     | Moderate              | Low              | Low                   | Moderate |

Table S4.5.3.3: Safety outcomes of observational studies regarding hepatic events I

| Study               | Treatment group | N patients | N events hepatic events | Incidence rate hepatic events                       | N patients history or carrier of hepatitis B/C | N events hepatitis B/C virus reactivation | Incidence rate hepatitis B/C virus reactivation | Adjusted for |
|---------------------|-----------------|------------|-------------------------|-----------------------------------------------------|------------------------------------------------|-------------------------------------------|-------------------------------------------------|--------------|
| Koike 2014 (122)    | TCZ             | 7,901      | 28                      | 0.84/100 PY                                         | Hep B n= 52<br>Hep C n=76                      | 0                                         | NAP                                             | -            |
| Genovese 2017 (123) | TCZ             | 4,171      | NR                      | 0.78/100 PY<br><br>hepatic serious AEs: 0.04/100 PY | NR                                             | NR                                        | NR                                              | -            |

Table S4.5.3.4: Safety outcomes of observational studies regarding hepatic events (transaminase elevations) II

| Study                                                                                      | Treatment group | N patients | AST elevation greater ULN (%) | ALT elevation greater ULN (%) | AST elevation >1-3x ULN (%) | ALT elevation >1-3x ULN (%) | AST elevation >3-5x ULN (%) | ALT elevation >3-5x ULN (%) | AST elevation >5x ULN (%) | ALT elevation >5x ULN (%) | Single ALT/AST elevation >3x ULN (%) | Elevations >3x ULN returning to normal (%) |
|--------------------------------------------------------------------------------------------|-----------------|------------|-------------------------------|-------------------------------|-----------------------------|-----------------------------|-----------------------------|-----------------------------|---------------------------|---------------------------|--------------------------------------|--------------------------------------------|
| Genovese 2017 (123)                                                                        | TCZ             | 4,171      | 70.6                          | 59.4                          | 59                          | 55                          | 8.9                         | 3.3                         | 2.9                       | 0.9                       | 7.7/3.6                              | 80                                         |
| ALT: alanine aminotransferase; AST: aspartate aminotransferase; ULN: upper limit of normal |                 |            |                               |                               |                             |                             |                             |                             |                           |                           |                                      |                                            |

## 4.6. Adverse events of special interest

### 4.6.1: Withdrawal and immunologic events: Comparison between IL-6R/L blockers and different bDMARDs (observational studies/randomized controlled trials)

Table S4.6.1.1: Safety outcomes of observational studies investigating IL-6R/L blockers regarding withdrawals.

| Study              | Registry                                    | Treatment group | Type of ratio | Incidence rate (95% CI) | age/gender aHR (I vs C) | aHR (I vs C)     | Risk of bias assessment |
|--------------------|---------------------------------------------|-----------------|---------------|-------------------------|-------------------------|------------------|-------------------------|
| Brodzky 2017 (124) | Debrecen Medical and Health Sciences Center | TCZ             | HR            | NR                      | NR                      | 0.474 (p=0.151)  | Low                     |
|                    |                                             | CZP             |               | NR                      | NR                      | REF              |                         |
|                    |                                             | ETA             |               | NR                      | NR                      | 0.63 (p=0.265)   |                         |
|                    |                                             | ADA             |               | NR                      | NR                      | 0.554 (p=0.152)  |                         |
|                    |                                             | RTX             |               | NR                      | NR                      | 0.505 (p=0.139)  |                         |
|                    |                                             | IFX             |               | NR                      | NR                      | 1.04 (p=0.923)   |                         |
|                    |                                             | GOL             |               | NR                      | NR                      | 0.918 (p=0.854)  |                         |
| Ebina 2018 (125)   | ANSWER cohort                               | TCZ             | HR            | NR                      | NR                      | 0.90 (0.44;1.84) | Low                     |
|                    |                                             | IFX             |               | NR                      | NR                      | REF              |                         |
|                    |                                             | ABA             |               | NR                      | NR                      | 0.53 (0.24;1.19) |                         |
|                    |                                             | ADA             |               | NR                      | NR                      | 1.06 (0.46;2.40) |                         |
|                    |                                             | CZP             |               | NR                      | NR                      | 0.77 (0.32;1.84) |                         |
|                    |                                             | ETN             |               | NR                      | NR                      | 0.73 (0.33;1.64) |                         |



|                       |                                          |     |                                                      |    |    |                  |     |
|-----------------------|------------------------------------------|-----|------------------------------------------------------|----|----|------------------|-----|
|                       |                                          | GOL |                                                      | NR | NR | 0.85 (0.39;1.83) |     |
| Ebina 2020 (126)      | ANSWER cohort                            | ADA | HR                                                   | NR | NR | 1.8 (1.0;3.1)    | Low |
|                       |                                          | CZP |                                                      | NR | NR | 0.8 (0.3;2.0)    |     |
|                       |                                          | ETN |                                                      | NR | NR | 0.4 (0.2;0.9)    |     |
|                       |                                          | GOL |                                                      | NR | NR | 1.0 (0.6;1.9)    |     |
|                       |                                          | IFX |                                                      | NR | NR | 1.2 (0.5;2.7)    |     |
|                       |                                          | TCZ |                                                      | NR | NR | 1.4 (0.9;2.3)    |     |
|                       |                                          | TOF |                                                      | NR | NR | 1.8 (0.9;3.5)    |     |
|                       |                                          | ABA |                                                      | NR | NR | REF              |     |
| Ebina 2019 (127)      | ANSWER cohort (elderly ≥65 years of age) | ADA | HR                                                   | NR | NR | 3.16 (1.36;7.35) | Low |
|                       |                                          | CZP |                                                      | NR | NR | 2.23 (0.61;8.15) |     |
|                       |                                          | ETN |                                                      | NR | NR | 2.50 (1.15;5.43) |     |
|                       |                                          | GOL |                                                      | NR | NR | 3.58 (1.63;7.82) |     |
|                       |                                          | IFX |                                                      | NR | NR | 3.62 (1.58;8.26) |     |
|                       |                                          | TCZ |                                                      | NR | NR | 3.04 (1.45;6.38) |     |
|                       |                                          | ABA |                                                      | NR | NR | REF              |     |
| Gottenberg 2019 (128) | AIR                                      | TCZ | life expectancy difference without failure after IPW | NR | NR | 0.5 (-0.4;1.4)   | Low |
|                       | ORA                                      | ABA |                                                      | NR | NR | REF              |     |
|                       | REGATE                                   | RTX |                                                      | NR | NR | 0.3 (-0.4;1.0)   |     |

Table S4.6.1.2: Safety outcomes of observational studies investigating IL-6R/L blockers regarding immunologic events.

| Study             | Registry                  | Treatment group | N events | Type of ratio                        | Incidence rate (95% CI)             | age/gender aHR (I vs C) | aHR (I vs C)     | Risk of bias assessment |
|-------------------|---------------------------|-----------------|----------|--------------------------------------|-------------------------------------|-------------------------|------------------|-------------------------|
| Yun 2017 (129)    | US claims data (Medicare) | TCZ (iv)        | 13       | Adjusted RR (95% CI) with first dose | 155.5/10 <sup>6</sup> (90.3;267.8)  | NR                      | 22.2 (11.6;42.4) | High                    |
|                   |                           | RXT (iv)        | 16       |                                      | 239.5/10 <sup>6</sup> (146.7;390.9) | NR                      | 18.0 (8.9; 36.2) |                         |
|                   |                           | ABA (iv)        | 16       |                                      | 41.1/10 <sup>6</sup> (25.2;67.1)    | NR                      | 7.1 (3.9; 12.8)  |                         |
|                   |                           | IFX (iv)        | 48       |                                      | 145.1/10 <sup>6</sup> (109.3;192.5) | NR                      | 26.9 (17.4–41.5) |                         |
|                   |                           | GOL (iv)        | 0        |                                      | 0/10 <sup>6</sup> (0;153.703)       | NR                      | NAP              |                         |
|                   |                           | ABA (sc)        | 0        |                                      | 0/10 <sup>6</sup> (0; 175.8)        | NR                      | NAP              |                         |
|                   |                           | TCZ (sc)        | 0        |                                      | 0/10 <sup>6</sup> (0; 38.425)       | NR                      | NAP              |                         |
|                   |                           | TNFi (sc)       | 44       |                                      | 5.8/10 <sup>6</sup> (4.3; 7.8)      | NR                      | REF              |                         |
| Salmon 2018 (130) | AIR                       | RTX (iv)        | 56       | -                                    | 0.7/100 PY                          | NR                      | NR               | Low                     |
|                   | ORA                       | TCZ (iv)        | 29       |                                      | 1/100 PY                            | NR                      | NR               |                         |
|                   | REGATE                    | ABA (iv)        | 15       |                                      | 0.6/100 PY                          | NR                      | NR               |                         |

#### 4.6.2: Changes in lipid profile: Comparison between IL-6R/L blockers and different bDMARDs (observational studies/randomized controlled trials)

Table S4.6.2.1: Baseline characteristics of RCTs investigating IL-6R/L blockers regarding changes in lipid profile.

| Study                        | Registry                                     | Inclusion criteria                        | Exclusion criteria                                                                                                                                                                         | Risk of bias assessment |
|------------------------------|----------------------------------------------|-------------------------------------------|--------------------------------------------------------------------------------------------------------------------------------------------------------------------------------------------|-------------------------|
| McInnes 2015 (MEASURE) (131) | RCT                                          | moderately to severely active RA, MTX-IR  | initiation of lipid-lowering, oral antidiabetic or antihypertensive medications or change in dose within 12 weeks of baseline was prohibited, and GC ( $\leq 10$ mg) had to remain stable. | Low                     |
| Gabay 2016 (132)             | Post-hoc analysis of ADACTA trial (phase IV) | RA patients, MTX-IR, receiving ADA or TCZ | none                                                                                                                                                                                       | High                    |

Table S4.6.2.2: Outcomes of RCTs investigating IL-6R/L blockers regarding changes in lipid profile.

| Study                         | Primary / Secondary outcome                                                                                                                                                                                                  | Timepoint (weeks) | Treatment arm | No. of patients (n) | Result                                         | p / 95% CI                                      |
|-------------------------------|------------------------------------------------------------------------------------------------------------------------------------------------------------------------------------------------------------------------------|-------------------|---------------|---------------------|------------------------------------------------|-------------------------------------------------|
| McInnes 2015 (MEASURE) (131)* | total cholesterol (median $\Delta$ from baseline); LDL-C (median $\Delta$ from baseline); HDL-C (median $\Delta$ from baseline); triglycerides (median $\Delta$ from baseline); total cholesterol/HDL ratio (median $\Delta$ | 12                | Placebo + MTX | 63                  | -; -1.9; 2.4; 2.2; 0.9; 2.5; -0.99; -0.47      | 10.4 (4.8;16.9)<br>p=0.0004;<br>11.0 (3.8;18.6) |
|                               |                                                                                                                                                                                                                              |                   | TCZ + MTX     | 69                  | 12.6; 10.6; 3.1; 28.1; 11.3; 4.7; -0.21; -0.17 | p=0.0076;<br>3.0 (-2.4;8.6)<br>p=0.2753;        |

|                                                                                                                                                                                                                                                                                                                                                                                                                                                                                                                                                                                                                                                                                                     |                                                                                                                                                                                                                                                                                                                                                                        |   |                    |     |                                                    |                                                                                                                                                          |
|-----------------------------------------------------------------------------------------------------------------------------------------------------------------------------------------------------------------------------------------------------------------------------------------------------------------------------------------------------------------------------------------------------------------------------------------------------------------------------------------------------------------------------------------------------------------------------------------------------------------------------------------------------------------------------------------------------|------------------------------------------------------------------------------------------------------------------------------------------------------------------------------------------------------------------------------------------------------------------------------------------------------------------------------------------------------------------------|---|--------------------|-----|----------------------------------------------------|----------------------------------------------------------------------------------------------------------------------------------------------------------|
|                                                                                                                                                                                                                                                                                                                                                                                                                                                                                                                                                                                                                                                                                                     | from baseline); ApoB/ApoA1 ratio (median $\Delta$ from baseline); mean change from baseline in PWV (pulse wave velocity) m/s (week 12); mean change from baseline in PWV (pulse wave velocity) m/s (week 24)                                                                                                                                                           |   |                    |     |                                                    | 25.4 (10.1;40.8)<br>p=0.0011;<br>9.7 (4.3;14.5)<br>p=0.0008;<br>2.1(-4.1;7.9)<br>p=0.5108;<br>0.22 to 1.35<br>(p=0.0067);<br>-0.27 to 0.87<br>(p=0.3042) |
| Gabay 2016 (132)                                                                                                                                                                                                                                                                                                                                                                                                                                                                                                                                                                                                                                                                                    | total cholesterol (mean $\Delta$ from baseline); triglycerides (mean $\Delta$ from baseline); LDL-C (mean $\Delta$ from baseline); HDL-C (mean $\Delta$ from baseline); total cholesterol/HDL ratio (mean $\Delta$ from baseline); HDL-SAA (median $\Delta$ from baseline); sPLA <sub>2</sub> IIA (median $\Delta$ from baseline); Lp(a) (mean $\Delta$ from baseline) | 8 | ADA 40 mg SC Q2W   | 162 | 0.17; 0.07; 0.07; 0.07;<br>-0.01; -1.1; -1.3; -1.1 | 0.67 (0.47;0.86)<br>p<0.0001;<br>0.24 (0.10;0.38)                                                                                                        |
|                                                                                                                                                                                                                                                                                                                                                                                                                                                                                                                                                                                                                                                                                                     |                                                                                                                                                                                                                                                                                                                                                                        |   | TCZ 8 mg/kg IV Q4W | 162 | 0.79; 0.29; 0.52; 0.14;<br>0.24; -3.2; -4.1; -7.6  | p= 0.0008;<br>0.46 (0.30;0.62)<br>p<0.0001;<br>0.07 (0.001;0.14)<br>p=0.0453;<br>0.27 (0.12;0.42)<br>p=0.0005;<br><br>p=0.0077;<br>p<0.0001;<br>p<0.0001 |
| <p>HDL: high-density lipoprotein; HDL-C: high-density lipoprotein cholesterol; LDL: low-density lipoprotein; LDL-C: low-density lipoprotein cholesterol; HDL-SAA: high-density lipoprotein-associated serum amyloid A; sPLA<sub>2</sub> IIA: secretory phospholipase A<sub>2</sub> II; Lp(a): lipoprotein (a)</p> <p>* part 1: 24 wks; TCZ 8 mg/kg q4w (n=69) or placebo (n=63) (MTX continued in both groups); part 2: open label follow-up 24-104 wks; HDL-associated serum amyloid A content decreased in TCZ recipients. TCZ induced reductions (&gt;30%) in secretory phospholipase A2-IIA, lipoprotein(a), fibrinogen and D-dimers and elevation of paraoxonase (all p&lt;0.0001 vs PBO).</p> |                                                                                                                                                                                                                                                                                                                                                                        |   |                    |     |                                                    |                                                                                                                                                          |

#### 4.6.3: Diabetes and changes in HbA1c: Comparison between IL-6R/L blockers and different bDMARDs (observational studies/randomized controlled trials)

Table S4.6.3.1: Safety outcomes of observational studies investigating IL-6R/L blockers regarding risk of diabetes treatment intensification and switching to insulin.

| Study           | Registry                    | Treatment group | N events | Type of ratio | Incidence rate (95% CI)      | age/gender aHR (I vs C) | aHR (I vs C)     | Risk of bias assessment |
|-----------------|-----------------------------|-----------------|----------|---------------|------------------------------|-------------------------|------------------|-------------------------|
| Chen 2020 (133) | US claims data (MarketScan) | TCZ             | 94       | HR            | 182.7/1000 PY (149.2; 223.6) | NR                      | 0.94 (0.74;1.19) | High                    |
|                 |                             | TNF-i           | 875      |               | 185.4/1000 PY (173.5; 198.1) | NR                      | 0.97 (0.82;1.15) |                         |
|                 |                             | RTX             | 124      |               | 198.0/1000 PY (166.0; 236.1) | NR                      | 0.99 (0.79;1.23) |                         |
|                 |                             | ABA             | 248      |               | 196.2/1000 PY (173.2; 222.2) | NR                      | REF              |                         |
|                 |                             | TOFA            | 58       |               | 148.2/1000 PY (114.6; 191.7) | NR                      | 0.67 (0.50;0.90) |                         |

Table S4.6.3.2: Baseline characteristics of post hoc analyses investigating effects of IL-6R/L blockers vs. TNF-i on glycosylated hemoglobin (HbA1c) in patients with RA and subgroups of patients with RA and diabetes

| Study                         | Registry                                                         | Inclusion criteria                                                                                                                         | Exclusion criteria                                         | Risk of bias assessment |
|-------------------------------|------------------------------------------------------------------|--------------------------------------------------------------------------------------------------------------------------------------------|------------------------------------------------------------|-------------------------|
| Genovese/Burmester 2020 (134) | post-hoc analysis of phase III study (MOBILITY, TARGET, MONARCH) | moderately to severely active RA, MTX-IR, TNFi-IR; pat. with diabetes were identified by medical history or use of antidiabetic medication | pat. with HbA1c $\geq$ 9% were excluded from all 3 studies | High                    |

Table S4.6.3.3: Outcomes of post hoc analyses investigating effects of IL-6R/L blockers vs. TNF-i on glycosylated hemoglobin (HbA1c) in patients with RA and subgroups of patients with RA and diabetes.

| Study                         | Primary / Secondary outcome                                                                                                                                   | Timepoint (weeks) | Treatment arm              | No. of patients (n) | Result | p-value vs. placebo/adalimumab |
|-------------------------------|---------------------------------------------------------------------------------------------------------------------------------------------------------------|-------------------|----------------------------|---------------------|--------|--------------------------------|
| Genovese/Burmester 2020 (134) | Change from baseline at week 24:<br>a) Patients with a medical history of diabetes or baseline use of antidiabetic medication:<br>LS mean difference (95% CI) | 24                | Placebo + csDMARDs         | 15                  |        |                                |
|                               |                                                                                                                                                               |                   | SAR 150 mg Q2W + csDMARDs  | 16                  | -0.47  | 0.0021                         |
|                               |                                                                                                                                                               |                   | SAR 200 mg Q2W + csDMARDs  | 15                  | -0.67  | < 0.0001                       |
|                               |                                                                                                                                                               |                   | ADA 40 mg Q2W monotherapy  | 14                  |        |                                |
|                               |                                                                                                                                                               |                   | SAR 200 mg Q2W monotherapy | 6                   | -0.43  | 0.0257                         |
|                               | b) baseline HbA1c $\geq$ 7.0%:<br>LS mean difference (95% CI)                                                                                                 | 24                | Placebo + csDMARDs         | 11                  |        |                                |
|                               |                                                                                                                                                               |                   | SAR 150 mg Q2W + csDMARDs  | 10                  | -0.48  | 0.0097                         |
|                               |                                                                                                                                                               |                   | SAR 200 mg Q2W + csDMARDs  | 9                   | -0.69  | 0.0003                         |
|                               |                                                                                                                                                               |                   | ADA 40 mg Q2W monotherapy  | 6                   |        |                                |
|                               |                                                                                                                                                               |                   | SAR 200 mg Q2W monotherapy | 4                   | -0.96  | 0.0002                         |
| LS: least squares             |                                                                                                                                                               |                   |                            |                     |        |                                |

#### 4.6.4: Effects on anemia and risk of neutropenia: Comparison between IL-6R/L blockers and different bDMARDs (observational studies/randomized controlled trials)

Table S4.6.4.1: Safety outcomes of observational studies investigating IL-6R/L blockers regarding changes in hemoglobin in patients with anemia at index date.

| Study                                                                                                                                                                                                                                                                                              | Registry                                    | Treatment group | N patients | Mean Hb (95% CI) (g/dL) index date | Δ Hb at 6 months (g/dL) mean (95% CI) | Δ Hb at 12 months (g/dL) mean (95% CI) | Δ Hb at 24 months (g/dL) mean (95% CI) | Risk of bias assessment |
|----------------------------------------------------------------------------------------------------------------------------------------------------------------------------------------------------------------------------------------------------------------------------------------------------|---------------------------------------------|-----------------|------------|------------------------------------|---------------------------------------|----------------------------------------|----------------------------------------|-------------------------|
| Paul 2018 (135)                                                                                                                                                                                                                                                                                    | Centricity Electronic Medical Record (CEMR) | TCZ             | 3,732      | 12.06 (11.98;12.14)                | 0.40 (0.24;0.56)                      | 0.55 (0.32;0.78)                       | 0.72 (0.36;1.08)                       | High                    |
|                                                                                                                                                                                                                                                                                                    |                                             | TOFA            | 3,126      | 11.89 (11.81;11.97)                | 0.40 (0.22;0.58)                      | 0.46 (0.15;0.76)                       | 0.58 (0.05;1.11)                       |                         |
|                                                                                                                                                                                                                                                                                                    |                                             | obDMARD         | 55,964     | 11.90 (11.87;11.92)                | 0.20 (0.16;0.24)                      | 0.25 (0.21;0.30)                       | 0.35 (0.29;0.41)                       |                         |
|                                                                                                                                                                                                                                                                                                    |                                             | onbDMARD        | 91,236)    | 11.86 (11.84;11.88)                | 0.17 (0.14;0.19)                      | 0.21 (0.18;0.24)                       | 0.26 (0.22;0.30)                       |                         |
| Hb: hemoglobin; obDMARD: biologic DMARDs excluding tocilizumab; onbDMARD: non-biologic DMARDs excluding tofacitinib; treatment groups balanced on sex and baseline measures, analysis was adjusted for age, sex, and duration of RA, history of CVD, CKD, cancer, and diabetes prior to index date |                                             |                 |            |                                    |                                       |                                        |                                        |                         |

Table S4.6.4.2: Safety outcomes of observational studies investigating IL-6R/L blockers regarding changes in neutrophils and neutropenia associated risk of infection.

| Study            | Registry                                                     | Treatment group                           | N patients | Neutrophils Grade 1 (n;%) | Neutrophils Grade 2 (n;%) | Neutrophils Grade 3 (n;%) | Neutrophils Grade 4 (n;%) | Serious infections around grade 1/2 neutrophil count (100 PY [95% CI]) | Serious infections around grade 3/4 neutrophil count (100 PY [95% CI]) | Risk of bias assessment |
|------------------|--------------------------------------------------------------|-------------------------------------------|------------|---------------------------|---------------------------|---------------------------|---------------------------|------------------------------------------------------------------------|------------------------------------------------------------------------|-------------------------|
| Moots 2017 (136) | pooled analysis of data from phase II and IV clinical trials | Placebo controlled pooled: Placebo+DMARDs | 1454       | 88 (6.1)                  | 41 (2.8)                  | 3 (0.2)                   | 0                         | 10.48 (2.16;30.62)                                                     | 0                                                                      | High                    |
|                  |                                                              | Placebo controlled pooled: all TCZ        | 2644       | 461 (17.4)                | 284 (10.7)                | 73 (2.8)                  | 8 (0.3)                   | 2.40 (0.88;5.22)                                                       | 0                                                                      |                         |
|                  |                                                              | LTE all-exposure population: DMARD-IR     | 2904       | 655 (22.6)                | 554 (19.1)                | 164 (5.6)                 | 17 (0.6)                  | 2.22 (1.49;3.19)                                                       | 1.97 (0.05;10.99)                                                      |                         |
|                  |                                                              | LTE all-exposure population: TNFi-IR      | 464        | 101 (21.8)                | 56 (12.1)                 | 22 (4.7)                  | 5 (1.1)                   | 3.68 (1.19;8.59)                                                       | 0                                                                      |                         |



|                                                                                                                                                                                                                                                                                                                    |  |                                        |      |            |            |           |          |                  |                   |  |
|--------------------------------------------------------------------------------------------------------------------------------------------------------------------------------------------------------------------------------------------------------------------------------------------------------------------|--|----------------------------------------|------|------------|------------|-----------|----------|------------------|-------------------|--|
|                                                                                                                                                                                                                                                                                                                    |  | LTE all-exposure population: MTX-naive | 417  | 83 (19.9)  | 84 (20.1)  | 28 (6.7)  | 2 (0.5)  | 3.32 (1.22;7.22) | 9.70 (0.25;54.05) |  |
|                                                                                                                                                                                                                                                                                                                    |  | LTE all-exposure population: all TCZ*  | 4163 | 900 (21.6) | 757 (18.2) | 223 (5.4) | 27 (0.6) | 2.48 (1.79;3.34) | 2.77 (0.34;10.01) |  |
| Grade 1 neutrophil count is defined as ANC < lower limit of normal to 1.5x10 <sup>9</sup> /l; grade 2, ANC <1.5 to 1.0x10 <sup>9</sup> ; grade 3, ANC <1.0 to 0.5x10 <sup>9</sup> /l; grade 4, ANC <0.5x10 <sup>9</sup> /l. ANC: absolute neutrophil count<br>* number of patients who had neutrophil measurements |  |                                        |      |            |            |           |          |                  |                   |  |

#### 4.6.5: Renal insufficiency: Comparison between IL-6R/L blockers and different bDMARDs (observational studies/randomized controlled trials)

Table S4.6.5.1: Safety outcomes of observational studies investigating IL-6R/L blockers in patients with RA and renal insufficiency

| Study                      | Registry       | Treatment group                        | N patients | Hemoglobin, g/dL, mean (95% CI) Week 0 | Hemoglobin, g/dL, mean (95% CI) Week 24 | Anemia, n (%) Week 0 | Anemia, n (%) Week 24 | Δ hemoglobin, mean (95% CI) | Risk of bias assessment |
|----------------------------|----------------|----------------------------------------|------------|----------------------------------------|-----------------------------------------|----------------------|-----------------------|-----------------------------|-------------------------|
| Mori 2015 (ACTRA-RI) (137) | ACTRA-RI study | Patients with renal insufficiency: TCZ | 64         | 11.5 (11.1;11.9)                       | 12.5 (12.1;12.9)                        | 36 (56.3)            | 24 (37.5)             | 0.96 (0.67;1.26)            | High                    |

|  |                                                           |     |                                                  |                                                             |                                          |           |                  |  |
|--|-----------------------------------------------------------|-----|--------------------------------------------------|-------------------------------------------------------------|------------------------------------------|-----------|------------------|--|
|  | Patients with renal insufficiency: TCZ + MTX              | 28  | 11.5 (10.9;12.0)                                 | 12.0 (11.5;12.4)                                            | 12 (42.9)                                | 9 (32.1)  | 0.48 (0.16;0.81) |  |
|  | Patients without renal insufficiency: TCZ                 | 106 | 12.3 (12;12.6)                                   | 13.2 (12.9;13.5)                                            | 36 (34)                                  | 21 (19.8) | 0.89 (0.61;1.16) |  |
|  | Patients without renal insufficiency: TCZ + MTX           | 173 | 12.1 (11.9;12.4)                                 | 12.9 (12.7;13.2)                                            | 65 (37.6)                                | 25 (14.5) | 0.81 (0.65;0.98) |  |
|  |                                                           |     |                                                  |                                                             |                                          |           |                  |  |
|  |                                                           |     | <b>Discontinuation within the first 24 weeks</b> | <b>Adverse events within the first 24 weeks, number (%)</b> | <b>Severe adverse events, number (%)</b> |           |                  |  |
|  | With renal insufficiency (n=102) MTX user, number (%)     |     | 5/33 (15.2)                                      | 4/33 (12.1)                                                 | 1/33 (3.0)                               |           |                  |  |
|  | With renal insufficiency (n=102) MTX non-user, number (%) |     | 4/69 (5.8)                                       | 5/69 (7.2)                                                  | 4/69 (5.8)                               |           |                  |  |
|  | Without renal insufficiency                               |     | 15/188 (8.0)                                     | 9/188 (4.8)                                                 | 4/188 (2.1)                              |           |                  |  |

|  |  |                                                                          |  |              |             |             |  |  |
|--|--|--------------------------------------------------------------------------|--|--------------|-------------|-------------|--|--|
|  |  | (n=303)<br>MTX user,<br>number (%)                                       |  |              |             |             |  |  |
|  |  | Without renal<br>insufficiency<br>(n=303)<br>MTX non-user,<br>number (%) |  | 10/115 (8.7) | 7/115 (6.1) | 2/115 (1.7) |  |  |

#### 4.6.6: Interstitial lung disease (ILD): Comparison between IL-6R/L blockers and different bDMARDs (observational studies/randomized controlled trials)

Table S4.6.6.1: Safety outcomes of observational studies investigating IL-6R/L blockers regarding risk of ILD and its complications.

| Study             | Registry                              | Treatment group | N patients | N events | Type of ratio | Incidence rate (95% CI) | age/gender aHR (I vs C) | aHR (I vs C)    | Risk of bias assessment |
|-------------------|---------------------------------------|-----------------|------------|----------|---------------|-------------------------|-------------------------|-----------------|-------------------------|
| Curtis 2015 (138) | US claims data (MarketScan; Medicare) | TNFi            | 7,951      | 9        | HR            | 1.6/1000 PY (0.8;3.1)   | NR                      | REF             | High                    |
|                   |                                       | TCZ             | 1,528      | 1        |               | 1/1000 PY (0;5.5)       | NR                      | 0.5 (0.06;4.0)  |                         |
|                   |                                       | RTX             | 1,134      | 4        |               | 4.7/1000 PY (1.3;12.1)  | NR                      | 2.2 (0.67;7.25) |                         |
|                   |                                       | ABA             | 2,683      | 2        |               | 1.1/1000 PY (0.1;4.1)   | NR                      | 0.6 (0.13;2.84) |                         |
|                   |                                       | ETN             | NR         | 0        |               | 0/1000 PY (0;3)         | NR                      | NR              |                         |
|                   |                                       | ADA             | NR         | 3        |               | 1.8/1000 PY (0.4;5.2)   | NR                      | NR              |                         |
|                   |                                       | IFX             | NR         | 3        |               | 4.1/1000 PY (0.8;12.0)  | NR                      | NR              |                         |

|  |  |     |    |   |  |                       |    |    |  |
|--|--|-----|----|---|--|-----------------------|----|----|--|
|  |  | CZP | NR | 3 |  | 3.2/1000 PY (0.7;9.3) | NR | NR |  |
|  |  | GOL | NR | 0 |  | 0/1000 PY (0;2.7)     | NR | NR |  |

#### 4.6.7: Neurological AEs: Comparison between IL-6R/L blockers and different bDMARDs (observational studies/randomized controlled trials)

Table S4.6.7.1: Safety outcomes of observational studies investigating IL-6R/L blockers regarding risk of idiopathic facial nerve palsy.

| Study                                                                          | Registry | Treatment group       | N patients | N events | Type of ratio | Incidence rate (95% CI) | age/gender aHR (I vs C) | aHR (I vs C) | Risk of bias assessment |
|--------------------------------------------------------------------------------|----------|-----------------------|------------|----------|---------------|-------------------------|-------------------------|--------------|-------------------------|
| Strangfeld 2019 (EULAR Abstract) (139)                                         | RABBIT   | csDMARDs              | NR         | 3        | HR            | 0.2/1000 PY (0.0;0.5)   | NR                      | NR           | Abstract                |
|                                                                                |          | ETN* (original)       | NR         | 4        |               | 0.7/1000 PY (0.2;1.6)   | NR                      | NR           |                         |
|                                                                                |          | ETN (biosimilar, SB4) | NR         | 1        |               | 1.9/1000 PY (0.1;6.9)   | NR                      | NR           |                         |
|                                                                                |          | GOL                   | NR         | 1        |               | 0.7/1000 PY (0.0;2.4)   | NR                      | NR           |                         |
|                                                                                |          | RTX*                  | NR         | 5        |               | 0.8/1000 PY (0.3;1.6)   | NR                      | NR           |                         |
|                                                                                |          | ABA                   | NR         | 1        |               | 0.3/1000 PY (0.0;1.2)   | NR                      | NR           |                         |
|                                                                                |          | TCZ                   | NR         | 3        |               | 0.5/1000 PY (0.1;1.1)   | NR                      | NR           |                         |
| * n=1 patient was exposed to both ENT (original) and RTX at the time of event. |          |                       |            |          |               |                         |                         |              |                         |

#### 4.6.8: Bone mineral density and osteoporosis: Comparison between IL-6R/L blockers and different bDMARDs (observational studies/randomized controlled trials)

Table S4.6.8.1: Safety outcomes of observational studies investigating IL-6R/L blockers regarding risk of osteoporotic fracture and other subtypes of fractures.

| Study                            | Registry                                          | Treatment group        | N patients        | N events osteoporotic fracture     | Type of ratio        | Incidence rate (95% CI)        | age/gender aHR (I vs C)        | HR (95% CI) TNF-i vs. TCZ        | Risk of bias assessment |
|----------------------------------|---------------------------------------------------|------------------------|-------------------|------------------------------------|----------------------|--------------------------------|--------------------------------|----------------------------------|-------------------------|
| Shin 2019 (EULAR Abstract) (140) | Korean National Health Insurance Service datasets | TNF-i                  | 2,339             | 54                                 | HR                   | 1.69/100 PY                    | NR                             | 1.00 (0.53;1.92)                 | Abstract                |
|                                  |                                                   | TCZ                    | 647               | 4                                  |                      | 0.7/100 PY                     | NR                             |                                  |                         |
|                                  |                                                   | <b>Treatment group</b> | <b>N patients</b> | <b>N events spinal fracture</b>    | <b>Type of ratio</b> | <b>Incidence rate (95% CI)</b> | <b>age/gender aHR (I vs C)</b> | <b>HR (95% CI) TNF-i vs. TCZ</b> |                         |
|                                  |                                                   | TNF-i                  | 2,339             | 29                                 | HR                   | 0.90/100 PY                    | NR                             | 0.98 (0.43;2.24)                 |                         |
|                                  |                                                   | TCZ                    | 647               | 10                                 |                      | 1.27/100 PY                    | NR                             |                                  |                         |
|                                  |                                                   | <b>Treatment group</b> | <b>N patients</b> | <b>N events no-spinal fracture</b> | <b>Type of ratio</b> | <b>Incidence rate (95% CI)</b> | <b>age/gender aHR (I vs C)</b> | <b>HR (95% CI) TNF-i vs. TCZ</b> |                         |
|                                  |                                                   | TNF-i                  | 2,339             | 25                                 | HR                   | 0.78/100 PY                    | NR                             | 1.03 (0.36;2.90)                 |                         |

|  |  |     |     |   |  |             |    |  |  |
|--|--|-----|-----|---|--|-------------|----|--|--|
|  |  | TCZ | 647 | 6 |  | 0.76/100 PY | NR |  |  |
|--|--|-----|-----|---|--|-------------|----|--|--|

Table S4.6.8.2: Outcomes of prospective studies investigating effects of IL-6R/L blockers on bone mineral density.

| Study           | Primary / Secondary outcome                                                                                                            | Timepoint (weeks) | Treatment arm                                                                                              | No. of patients (n) | Result                                      | p-value             | Risk of bias assessment |
|-----------------|----------------------------------------------------------------------------------------------------------------------------------------|-------------------|------------------------------------------------------------------------------------------------------------|---------------------|---------------------------------------------|---------------------|-------------------------|
| Kume 2014 (141) | Lumbar spine:<br>BMD at week 52, mean (S.D.), g/cm <sup>2</sup><br>-all patients<br>-Normal BMD at baseline<br>-Osteopenia at baseline | 52                | TCZ 8mg/kg IV Q4W+MTX<br>(no GC, no bisphosphonates or PTH)                                                | 86                  | 0.986 (0.21), 1.091<br>(0.14), 0.843 (0.18) | 0.12, 0.24,<br>0.02 | High                    |
|                 | Femoral neck:<br>BMD at week 52, mean (S.D.), g/cm <sup>2</sup><br>-all patients<br>-Normal BMD at baseline<br>-Osteopenia at baseline | 52                | TCZ 8mg/kg IV Q4W+MTX<br>(no GC, no bisphosphonates or PTH)                                                | 86                  | 0.826 (0.12), 0.919<br>(0.14), 0.698 (0.21) | 0.27, 0.19,<br>0.03 |                         |
| Chen 2017 (142) | Lumbar spine<br>-BMD (g/cm <sup>2</sup> )<br>- T-score                                                                                 | 104               | TCZ 4 or 8mg/kg IV Q4W +csDMARD +<br>stable GC<br>(no antiosteoporosis medication)<br><b>ACPA-positive</b> | 54                  | 0.93, -0.99;<br>0.67, -1.76;<br>0.66, -1.76 | 0.087,<br>0.027;    | High                    |

|                                                                     |                                                               |  |                                                                                                            |    |                                             |                                  |  |
|---------------------------------------------------------------------|---------------------------------------------------------------|--|------------------------------------------------------------------------------------------------------------|----|---------------------------------------------|----------------------------------|--|
|                                                                     | Femoral neck, right<br>-BMD (g/cm <sup>2</sup> )<br>- T-score |  | TCZ 4 or 8mg/kg IV Q4W +csDMARD +<br>stable GC<br>(no antiosteoporosis medication)<br><b>ACPA-negative</b> | 22 | 1.08, -0.17;<br>0.81, -0.98;<br>0.82, -0.88 | 0.046,<br>0.043;<br>0.064; 0.036 |  |
|                                                                     | Femoral neck, left<br>-BMD (g/cm <sup>2</sup> )<br>- T-score  |  |                                                                                                            |    |                                             |                                  |  |
| ACPA: anticitrullinated protein antibody; BMD: bone mineral density |                                                               |  |                                                                                                            |    |                                             |                                  |  |

#### 4.6.9: Pregnancy: Clinical trials and post-marketing data.

Table S4.6.9.1: Pregnancy outcome after exposure to IL-6R inhibition.

| Study                                                                                                                                                                       | Registry                     | Treatment group            | N patients | Live birth, n (%) | Liveborn children, n | Spontaneous abortion, n (%) | ETOP, n (%) | Stillbirth, n | Mal-formation, n (%) | Preterm birth, n (%) | Risk of bias assessment |
|-----------------------------------------------------------------------------------------------------------------------------------------------------------------------------|------------------------------|----------------------------|------------|-------------------|----------------------|-----------------------------|-------------|---------------|----------------------|----------------------|-------------------------|
| Hoeltzenbein 2016 (143)                                                                                                                                                     | Roche Global Safety Database | TCZ Exposure Prospective   | 180        | 109 (60.6%)       | 111                  | 39 (21.7%)                  | 31 (17.2%)  | 1             | 5/111 (4.5%)         | 29/93 (31.1%)        | High                    |
|                                                                                                                                                                             |                              | TCZ Exposure Retrospective | 108        | 55 (50.9%)        | 56                   | 31 (28.7%)                  | 22 (20.4%)  | 0             | NR                   | 2/56 (20.0%)         |                         |
| ETOP: elective termination of pregnancy.<br>no increased risks for adverse pregnancy outcomes were observed after paternal exposure in n=13 pregnancies with known outcome. |                              |                            |            |                   |                      |                             |             |               |                      |                      |                         |

Table S4.6.9.2: Pregnancy outcome after exposure to IL-6R inhibition.

| Study                         | Registry                                                                                     | Treatment group             | N patients       | Liveborn children, n | Spontaneous abortion, n | Induced abortion, n | Congenital malformations, n | Risk of bias assessment |
|-------------------------------|----------------------------------------------------------------------------------------------|-----------------------------|------------------|----------------------|-------------------------|---------------------|-----------------------------|-------------------------|
| Weber-Schoendorfer 2016 (144) | Pharmakovigilanzzentrum<br>Embryonaltoxikologie<br>(further referred to as Embryotox Berlin) | TCZ Exposure<br>Prospective | 16<br>(maternal) | 11                   | 4                       | 1                   | 0                           | High                    |

## 4.6.10: Randomized controlled trials (RCTs) and long-term extension studies (LTEs)

Table S4.6.10.1: Sarilumab: Overview of RCTs.

| Study           | Trial      | Treatment                 | Risk of bias assessment |
|-----------------|------------|---------------------------|-------------------------|
| Emery 2019 (57) | ASCERTAIN  | TCZ 4 or 8 IV Q4W + DMARD | Unclear                 |
|                 |            | SAR 150 Q2W + DMARD       |                         |
|                 |            | SAR 200 Q2W + DMARD       |                         |
|                 | 1309 (OLE) | TCZ 4 IV Q4W + MTX        | High                    |
|                 |            | TCZ 8 IV Q4W + MTX        |                         |
|                 |            | SAR 150 + MTX             |                         |
|                 |            | SAR 200 + MTX             |                         |



|                   |                          |                    |     |
|-------------------|--------------------------|--------------------|-----|
| Tanaka 2019 (3)   | KAKEHASI<br>(PBO period) | PBO + MTX          | Low |
|                   |                          | SAR 150 Q2W + MTX  |     |
|                   |                          | SAR 200 Q2W + MTX  |     |
| Kameda 2020 (145) | HARUKA                   | SAR 150 Q2W        | Low |
|                   |                          | SAR 200 Q2W        |     |
|                   |                          | SAR 150 Q2W + nMTX |     |
|                   |                          | SAR 200 Q2W + nMTX |     |

Table S4.6.10.2: Sarilumab: Rates of serious AEs, serious infections, opportunistic infections, deaths, malignancies and CVE (RCTs).

| Study           | Trial      | Treatment group           | N patients | Any serious AE n (%) | Serious infections n (%) | OI n (%) | Any major CVE n (%) | Any malignancy n (%) | Deaths of any cause n (%) |
|-----------------|------------|---------------------------|------------|----------------------|--------------------------|----------|---------------------|----------------------|---------------------------|
| Emery 2019 (57) | ASCERTAIN  | TCZ 4 or 8 IV Q4W + DMARD | 101        | 7 (6.9)              | 2 (2.0)                  | 0        | 0                   | NR                   | 1 (1.0)                   |
|                 |            | SAR 150 Q2W + DMARD       | 49         | 1 (2.0)              | 0                        | 0        | 0                   | NR                   | NR                        |
|                 |            | SAR 200 Q2W + DMARD       | 51         | 3 (5.9)              | 1 (2.0)                  | 0        | 0                   | NR                   | NR                        |
|                 | 1309 (OLE) | TCZ 4 IV Q4W + MTX        | 25         | 0                    | 0                        | 0        | 0                   | NR                   | NR                        |
|                 |            | TCZ 8 IV Q4W + MTX        | 24         | 1 (4.2)              | 0                        | 0        | 0                   | NR                   | NR                        |
|                 |            | SAR 150 + MTX             | 26         | 0                    | 0                        | 0        | 0                   | NR                   | NR                        |
|                 |            | SAR 200 + MTX             | 26         | 0                    | 0                        | 0        | 0                   | NR                   | NR                        |
|                 |            | PBO + MTX                 | 81         | 6 (7.4)              | 0                        | 0        | 0                   | 0                    | 0                         |

|                   |                       |                    |    |          |         |         |   |          |   |
|-------------------|-----------------------|--------------------|----|----------|---------|---------|---|----------|---|
| Tanaka 2019 (3)   | KAKEHASI (PBO period) | SAR 150 Q2W + MTX  | 81 | 4 (4.9)  | 5 (6.2) | 1 (1.2) | 0 | 0        | 0 |
|                   |                       | SAR 200 Q2W + MTX  | 80 | 4 (5.0)  | 0       | 0       | 0 | 1 (1.3)  | 0 |
| Kameda 2020 (145) | HARUKA                | SAR 150 Q2W        | 30 | 1 (3.3)  | 1 (3.3) | 0       | 0 | 0        | 0 |
|                   |                       | SAR 200 Q2W        | 31 | 2 (6.5)  | 1 (3.2) | 0       | 0 | 2 (13.3) | 0 |
|                   |                       | SAR 150 Q2W + nMTX | 15 | 0        | 0       | 0       | 0 | 0        | 0 |
|                   |                       | SAR 200 Q2W + nMTX | 15 | 3 (20.0) | 1 (6.7) | 0       | 0 | 0        | 0 |

Table S4.6.10.3: Sarilumab: Rates of GIP, injection-site / infusion reactions, immunogenicity and neutropenia (RCTs).

| Study           | Trial                 | Treatment group           | N patients | GIP n (%) | Inj/Inf reaction n (%) | ADA n (%) | Any neutropenia n (%) |
|-----------------|-----------------------|---------------------------|------------|-----------|------------------------|-----------|-----------------------|
| Emery 2019 (57) | ASCERTAIN             | TCZ 4 or 8 IV Q4W + DMARD | 101        | NR        | 1 (1.0)                | NR        | 4 (3.9)               |
|                 |                       | SAR 150 Q2W + DMARD       | 49         | NR        | 4 (8.2)                | NR        | 6 (12.2)              |
|                 |                       | SAR 200 Q2W + DMARD       | 51         | NR        | 4 (7.8)                | NR        | 8 (15.7)              |
|                 | 1309 (OLE)            | TCZ 4 IV Q4W + MTX        | 25         | NR        | NR                     | NR        | NR                    |
|                 |                       | TCZ 8 IV Q4W + MTX        | 24         | NR        | NR                     | NR        | NR                    |
|                 |                       | SAR 150 + MTX             | 26         | NR        | NR                     | NR        | NR                    |
|                 |                       | SAR 200 + MTX             | 26         | NR        | NR                     | NR        | NR                    |
| Tanaka 2019 (3) | KAKEHASI (PBO period) | PBO + MTX                 | 81         | 0         | 3 (3.7)                | 1 (1.2)   | 0                     |
|                 |                       | SAR 150 Q2W + MTX         | 81         | 0         | 11 (13.6)              | 1 (1.2)   | 7 (8.6)               |

|                   |        |                    |    |   |           |          |          |
|-------------------|--------|--------------------|----|---|-----------|----------|----------|
|                   |        | SAR 200 Q2W + MTX  | 80 | 0 | 12 (15.0) | 1 (1.3)  | 9 (11.3) |
| Kameda 2020 (145) | HARUKA | SAR 150 Q2W        | 30 | 0 | 1 (3.3)   | 5 (16.7) | 1 (3.3)  |
|                   |        | SAR 200 Q2Q        | 31 | 0 | 6 (19.4)  | 2 (6.5)  | 3 (9.7)  |
|                   |        | SAR 150 Q2W + nMTX | 15 | 0 | 0         | 0        | 5 (33.3) |
|                   |        | SAR 200 Q2W + nMTX | 15 | 0 | 1 (6.7)   | 0        | 3 (20.0) |

Table S4.6.10.4: Sarilumab: Rates of serious AEs, deaths, malignancies and CVE (LTE).

| Study                  | Trial                                             | Treatment group                               | N patients | Any serious AE n (%), IR                | Any major CVE n (%), IR              | Any malignancy n (%), IR             | Deaths of any cause n (%), IR |
|------------------------|---------------------------------------------------|-----------------------------------------------|------------|-----------------------------------------|--------------------------------------|--------------------------------------|-------------------------------|
| Fleischmann 2020 (146) | MOBILITY TARGET ASCERTAIN ONE COMPARE EASY EXTEND | SAR 150/200/100 Q2W or SAR 100/150 QW + DMARD | 2887       | 685 (23.7)<br>IR/100 PY (nE): 9.4 (685) | 41 (1.4)<br>IR/100 PY (nE): 0.5 (45) | 52 (1.8)<br>IR/100 PY (nE): 0.7 (56) | 31 (1.1)<br>IR: 0.4 (31)      |
|                        |                                                   | SAR Mono                                      | 471        | 52 (11.0)<br>IR/100 PY (nE): 6.7 (52)   | 2 (0.4)<br>IR/100 PY (nE): 0.2 (2)   | 4 (0.8)<br>IR/100 PY (nE): 0.6 (5)   | 5 (1.1)<br>IR: 0.6 (5)        |

Table S4.6.10.5: Sarilumab: Rates of serious infections, opportunistic infections, serious demyelinating disorders and VTE (LTE).

| Study                  | Trial                                             | Treatment group                               | N patients | Serious infections n (%), IR           | OI n (%), IR                         | demyelinating disorders n (%), IR  | VTE n (%), IR                        |
|------------------------|---------------------------------------------------|-----------------------------------------------|------------|----------------------------------------|--------------------------------------|------------------------------------|--------------------------------------|
| Fleischmann 2020 (146) | MOBILITY TARGET ASCERTAIN ONE COMPARE EASY EXTEND | SAR 150/200/100 Q2W or SAR 100/150 QW + DMARD | 2887       | 232 (8.0)<br>IR/100 PY (nE): 3.7 (301) | 72 (2.5)<br>IR/100 PY (nE): 0.9 (76) | 0                                  | 46 (1.6)<br>IR/100 PY (nE): 0.8 (67) |
|                        |                                                   | SAR Mono                                      | 471        | 7 (1.5)<br>IR/100 PY (nE): 1.0 (8)     | 6 (1.3)<br>IR/100 PY (nE): 0.7 (6)   | 1 (0.2)<br>IR/100 PY (nE): 0.1 (1) | 3 (0.6)<br>IR/100 PY (nE): 0.4 (3)   |

Table S4.6.10.6: Sarilumab: Rates of GIP, injection-site / infusion reactions, immunogenicity, neutropenia and hepatic disorders (LTE).

| Study                  | Trial                                             | Treatment group                               | N patients | GIP n (%), IR                      | Inj/Inf reaction n (%), IR    | ADA n (%), IR | Any neutropenia n (%), IR     | Hepatic disorders n (%), IR |
|------------------------|---------------------------------------------------|-----------------------------------------------|------------|------------------------------------|-------------------------------|---------------|-------------------------------|-----------------------------|
| Fleischmann 2020 (146) | MOBILITY TARGET ASCERTAIN ONE COMPARE EASY EXTEND | SAR 150/200/100 Q2W or SAR 100/150 QW + DMARD | 2887       | 9 (0.3)<br>IR/100 PY (nE): 0.1 (9) | 333 (11.5)<br>IR: 23.6 (1934) | NR            | 536 (18.6)<br>IR: 13.8 (1132) | 448 (15.5)<br>IR: 8.9 (726) |
|                        |                                                   | SAR Mono                                      | 471        | 0                                  | 4 (8.2)                       | NR            | 85 (18.0)<br>IR: 27.7 (225)   | 39 (8.3)<br>IR: 7.1 (58)    |

Table S4.6.10.7: Sirukumab: Overview of RCTs.

| Study               | Trial             | Treatment    | Risk of bias assessment |
|---------------------|-------------------|--------------|-------------------------|
| Aletaha 2017 (14)   | SIRROUND-T        | PBO          | Low                     |
|                     |                   | SIR 50 Q4W   |                         |
|                     |                   | SIR 100 Q2W  |                         |
| Takeuchi 2017 (11)  | SIRROUND-D        | PBO          | Unclear                 |
|                     |                   | SIR 50 Q4W   |                         |
|                     |                   | SIR 100 Q2W  |                         |
|                     |                   | SIR combined |                         |
| Takeuchi 2018 (147) | no name available | SIR 50 Q4W   | Low                     |
|                     |                   | SIR 100 Q2W  |                         |
|                     |                   | SIR combined |                         |
| Taylor 2018 (21)    | SIRROUND-T        | ADA 40 Q2W   | Low                     |
|                     |                   | SIR 50 Q4W   |                         |
|                     |                   | SIR 100 Q2W  |                         |

Table S4.6.10.8: Sirukumab: Rates of serious AEs, serious infections, opportunistic infections, deaths, malignancies and CVE (RCTs).

| Study               | Trial             | Treatment group | N patients | Any serious AEn (%) | Serious infections n (%) | OIn (%) | Any major CVE n (%) | Any malignancy n (%) | Deaths of any cause n (%) |
|---------------------|-------------------|-----------------|------------|---------------------|--------------------------|---------|---------------------|----------------------|---------------------------|
| Aletaha 2017 (14)   | SIRROUND-T        | PBO             | 294        | 15 (5)              | 2 (<1)                   | 0       | 2 (<1)              | 1 (<1)               | 0                         |
|                     |                   | SIR 50 Q4W      | 292        | 28 (10)             | 13 (4)                   | 0       | 1 (<1)              | 4 (1)                | 0                         |
|                     |                   | SIR 100 Q2W     | 292        | 22 (8)              | 8 (3)                    | 0       | 0                   | 1 (<1)               | 0                         |
| Takeuchi 2017 (11)  | SIRROUND-D        | PBO             | 556        | 38 (6.8)            | 10 (1.8)                 | 0       | 2 (0.4)             | 2 (0.4)              | 1 (0.2)                   |
|                     |                   | SIR 50 Q4W      | 663        | 73 (11.0)           | 27 (4.1)                 | 0       | 8 (1.2)             | 2 (0.3)              | 7 (1.1)                   |
|                     |                   | SIR 100 Q2W     | 662        | 65 (9.8)            | 22 (3.3)                 | 0       | 3 (0.5)             | 5 (0.8)              | 3 (0.5)                   |
|                     |                   | SIR combined    | 1325       | 138 (10.4)          | 49 (3.7)                 | 0       | 11 (0.8)            | 7 (0.5)              | 10 (0.8)                  |
| Takeuchi 2018 (147) | no name available | SIR 50 Q4W      | 61         | 4 (6.6)             | 1 (1.6)                  | 0       | 0                   | 0                    | 0                         |
|                     |                   | SIR 100 Q2W     | 61         | 5 (8.2)             | 2 (3.3)                  | 0       | 0                   | 1 (1.6)              | 0                         |
|                     |                   | SIR combined    | 122        | 9 (7.4)             | 3 (2.5)                  | 0       | 0                   | 1 (0.8)              | 0                         |
| Taylor 2018 (21)    | SIRROUND-T        | ADA 40 Q2W      | 186        | 16 (8.6)            | 4 (2.2)                  | 0       | 0                   | 1 (0.5)              | 0                         |
|                     |                   | SIR 50 Q4W      | 186        | 29 (15.6)           | 14 (7.5)                 | 1       | 1 (0.5)             | 3 (1.6)              | 3 (1.6)                   |
|                     |                   | SIR 100 Q2W     | 187        | 22 (11.8)           | 5 (2.7)                  | 0       | 2 (1.1)             | 2 (1.1)              | 1 (0.5)                   |

Table S4.6.10.9: Sirukumab: Rates of GIP, injection-site / infusion reactions, immunogenicity, neutropenia and hepatic disorders (RCTs).

| Study               | Trial             | Treatment group | N patients | GIP n (%) | Inj/Inf reaction n (%) | Antidrug antibody n (%) | Any neutropenia n (%) |
|---------------------|-------------------|-----------------|------------|-----------|------------------------|-------------------------|-----------------------|
| Aletaha 2017 (14)   | SIRROUND-T        | PBO             | 294        | 0         | 9 (3)                  | NR                      | 9 (3)                 |
|                     |                   | SIR 50 Q4W      | 292        | 2(<1)     | 29 (10)                | NR                      | 94 (32)               |
|                     |                   | SIR 100 Q2W     | 292        | 3 (1)     | 68 (23)                | NR                      | 103 (35)              |
| Takeuchi 2017 (11)  | SIRROUND-D        | PBO             | 556        | 1 (0.2)   | 14 (2.5)               | NR                      | 5 (0.9)               |
|                     |                   | SIR 50 Q4W      | 663        | 1 (0.2)   | 71 (10.7)              | NR                      | 38 (5.7)              |
|                     |                   | SIR 100 Q2W     | 662        | 0         | 108 (16.3)             | NR                      | 29 (4.4)              |
|                     |                   | SIR combined    | 1325       | 1 (0.2)   | 179 (13.5)             | NR                      | 67 (5.1)              |
| Takeuchi 2018 (147) | no name available | SIR 50 Q4W      | 61         | 0         | 26 (42.6)              | NR                      | 7 (11.5)              |
|                     |                   | SIR 100 Q2W     | 61         | 0         | 27 (44.3)              | NR                      | 4 (6.6)               |
|                     |                   | SIR combined    | 122        | 0         | 53 (43.4)              | NR                      | 11 (9.0)              |
| Taylor 2018 (21)    | SIRROUND-T        | ADA 40 Q2W      | 186        | 0         | 16 (8.6)               | 171 (91.9)              | 4 (2.2)               |
|                     |                   | SIR 50 Q4W      | 186        | 1 (0.5)   | 20 (10.8)              | 7 (3.8)                 | 17 (9.1)              |
|                     |                   | SIR 100 Q2W     | 187        | 1 (0.5)   | 43 (23.0)              | 9 (4.9)                 | 11 (5.9)              |

Table S4.6.10.10: Sirukumab: Rates of serious AEs, serious infections, opportunistic infections, deaths, malignancies and CVE (LTE).

| Study             | Trial                | Treatment group | N patients | Any serious AEn (%) | Serious infections n (%) | OIn (%) | Any major CVE n (%) | Any malignancy n (%) | Deaths of any cause n (%) |
|-------------------|----------------------|-----------------|------------|---------------------|--------------------------|---------|---------------------|----------------------|---------------------------|
| Thorne 2018 (148) | SIRROUND-D (2 years) | PBO             | 556        | 40 (7.2)            | 11 (2.0)                 | 0       | 1 (0.2)             | 2 (0.4)              | 1 (0.2)                   |
|                   |                      | SIR 50 Q4W      | 798        | 141 (17.7)          | 58 (7.3)                 | 1 (0.1) | 13 (1.6)            | 8 (1.0)              | 10 (1.3)                  |
|                   |                      | SIR 100 Q2W     | 799        | 132 (16.5)          | 47 (5.9)                 | 4 (0.5) | 5 (0.6)             | 12 (1.5)             | 11 (1.4)                  |
|                   |                      | SIR combined    | 1597       | 273 (17.1)          | 105 (6.6)                | 5 (0.3) | 18 (1.1)            | 20 (1.3)             | 21 (1.3)                  |

Table S4.6.10.11: Sirukumab: Rates of GIP, injection-site / infusion reactions, immunogenicity, neutropenia and hepatic disorders (LTE).

| Study             | Trial                | Treatment group | N patients | GIP n (%) | Inj/Inf reaction n (%) | ADA n (%) | Any neutropenia n (%) |
|-------------------|----------------------|-----------------|------------|-----------|------------------------|-----------|-----------------------|
| Thorne 2018 (148) | SIRROUND-D (2 years) | PBO             | 556        | 1 (0.2)   | 14 (2.5)               | 0         | 5 (0.9)               |
|                   |                      | SIR 50 Q4W      | 798        | 3 (0.4)   | 84 (10.5)              | 14 (1.7)  | 52 (6.5)              |
|                   |                      | SIR 100 Q2W     | 799        | 1 (0.1)   | 135 (16.9)             | 6 (0.7)   | 45 (5.6)              |
|                   |                      | SIR combined    | 1597       | 4 (0.3)   | 219 (13.7)             | 20 (2.4)  | 97 (6.1)              |



#### 4.6.11: Juvenile idiopathic arthritis (JIA): Comparison between IL-6R/L blockers and different bDMARDs (observational studies/randomized controlled trials)

Table S4.6.11.1: Safety outcomes of observational studies investigating IL-6R/L blockers in JIA regarding serious AEs.

| pcJIA Study         | Registry              | Treatment group | N patients | N events | Incidence rate (95% CI)    | age/gender aHR | RR                                                                              | Risk of bias assessment |
|---------------------|-----------------------|-----------------|------------|----------|----------------------------|----------------|---------------------------------------------------------------------------------|-------------------------|
| Horneff 2016 (149)  | BIKER                 | TCZ             | 74         | 3        | 4.1/100 PY (1.3;12.8)      | NR             | ETN vs ADA: 2.06 (1.35;3.16)<br>ADA vs TCZ: ns<br>ETN vs TCZ: 5.48 (1.74;17.25) | High                    |
|                     |                       | ADA             | 236        | 26       | 11.0/100 PY (7.5;16.2)     | NR             |                                                                                 |                         |
|                     |                       | ETN             | 419        | 119      | 22.07/100 PY (19.0;27.2)   | NR             |                                                                                 |                         |
| Grönlund 2020 (150) | JIA database, Finland | TCZ             | 56         | 11       | 12.9/100 PY                | No control     | No control                                                                      | High                    |
| sJIA Study          | Registry              | Treatment group | N patients | N events | Incidence rate (95% CI)    | age/gender aHR | RR*                                                                             | Risk of bias assessment |
| Klein 2020 (151)    | BIKER                 | TCZ             | 109        | 51       | 20.91/100 PY (15.56;27.48) | NR             | 1.33 (1.06;1.66)                                                                | High                    |
|                     |                       | ETA             | 151        | 14       | 3.53/100 PY (1.93;5.92)    | NR             | 0.47 (0.33;0.68)                                                                |                         |
|                     |                       | ANR             | 71         | 8        | 6.61/100 PY (2.85;13.03)   | NR             | 0.69 (0.46;1.09)                                                                |                         |
|                     |                       | CAM             | 51         | 19       | 20.26/100 PY (12.17;31.56) | NR             | 1.41 (1.09;1.83)                                                                |                         |

CAM: canakinumab

\* relative risk for an adverse event for each biologic in study by Klein et al. 2020 (BIKER) was estimated in comparison with the other three bDMARDs combined (applies to all further risk information in the tables below).

Table S4.6.11.2: Safety outcomes of observational studies investigating IL-6R/L blockers in JIA regarding serious infections.

| pcJIA Study         | Registry              | Treatment group | N patients | N events | Incidence rate (95% CI)  | age/gender aHR | RR                           | Risk of bias assessment |
|---------------------|-----------------------|-----------------|------------|----------|--------------------------|----------------|------------------------------|-------------------------|
| Horneff 2016 (149)  | BIKER                 | TCZ             | 74         | 3        | 4.14/100 PY (1.31;12.57) | NR             | ADA vs TCZ: ns               | High                    |
|                     |                       | ADA             | 236        | 13       | 5.5/100 PY (3.19;9.47)   | NR             | ETN vs TCZ: ns               |                         |
|                     |                       | ETN             | 419        | 50       | 9.54/100 PY (7.23;12.59) | NR             | ETN vs ADA: 1.73 (0.94;3.19) |                         |
| Grönlund 2020 (150) | JIA database, Finland | TCZ             | 56         | 3        | NR                       | No control     | No control                   | High                    |
| sJIA Study          | Registry              | Treatment group | N patients | N events | Incidence rate (95% CI)  | age/gender aHR | RR                           | Risk of bias assessment |
| Klein 2020 (151)    | BIKER                 | TCZ             | 109        | 13       | 5.33/100 PY (2.84;9.11)  | NR             | 1.31 (0.49;3.48)             | High                    |
|                     |                       | ETA             | 151        | 4        | 1.01/100 PY (0.27;2.58)  | NR             | 0.23 (0.05;1.03)             |                         |
|                     |                       | ANR             | 71         | 6        | 4.96/100 PY (1.82;10.79) | NR             | 2.82 (1.05;7.60)             |                         |
|                     |                       | CAM             | 51         | 3        | 3.2/100 PY (0.66;9.33)   | NR             | 0.54 (0.14;2.01)             |                         |

Table S4.6.11.3: Safety outcomes of observational studies investigating IL-6R/L blockers in JIA regarding malignancies.

| pcJIA Study         | Registry              | Treatment group | N patients | N events | Incidence rate (95% CI) | age/gender aHR | RR                  | Risk of bias assessment |
|---------------------|-----------------------|-----------------|------------|----------|-------------------------|----------------|---------------------|-------------------------|
| Horneff 2016 (149)  | BIKER                 | TCZ             | 74         | 0        | NAP                     | NR             | ETN vs ADA: ns      | High                    |
|                     |                       | ADA             | 236        | 0        | NAP                     | NR             | ADA vs TCZ: ns      |                         |
|                     |                       | ETN             | 419        | 1        | 0.19/100 PY (0.03;1.35) | NR             | ETN vs TCZ: ns      |                         |
| Grönlund 2020 (150) | JIA database, Finland | TCZ             | 56         | 0        | NAP                     | No control     | No control          | High                    |
| sJIA Study          | Registry              | Treatment group | N patients | N events | Incidence rate (95% CI) | age/gender aHR | RR                  | Risk of bias assessment |
| Klein 2020 (151)    | BIKER                 | TCZ             | 109        | 1        | 0.41/100 PY (0.01;2.28) | NR             | 5.85 (0.09;381.76)  | High                    |
|                     |                       | ETA             | 151        | 1        | 0.25/100 PY (0.01;1.40) | NR             | 1.84 (0.01;7763.91) |                         |
|                     |                       | ANR             | 71         | 0        | NAP                     | NR             | NAP                 |                         |
|                     |                       | CAM             | 51         | 0        | NAP                     | NR             | NAP                 |                         |

Table S4.6.11.4: Safety outcomes of observational studies investigating IL-6R/L blockers in JIA regarding GIP.

| sJIA Study       | Registry | Treatment group | N patients | N events | Incidence rate (95% CI) | age/gender aHR | RR  | Risk of bias assessment |
|------------------|----------|-----------------|------------|----------|-------------------------|----------------|-----|-------------------------|
| Klein 2020 (151) | BIKER    | TCZ             | 109        | 0        | 0                       | NAP            | NAP | High                    |
|                  |          | ETA             | 151        | 0        | 0                       | NAP            | NAP |                         |
|                  |          | ANR             | 71         | 0        | 0                       | NAP            | NAP |                         |
|                  |          | CAM             | 51         | 0        | 0                       | NAP            | NAP |                         |

Table S4.6.11.5: Safety outcomes of observational studies investigating IL-6R/L blockers in JIA regarding hepatic events.

| pcJIA Study         | Registry              | Treatment group | N patients | N events | Incidence rate (95% CI)  | age/gender aHR | RR             | Risk of bias assessment |
|---------------------|-----------------------|-----------------|------------|----------|--------------------------|----------------|----------------|-------------------------|
| Horneff 2016 (149)  | BIKER                 | TCZ             | 74         | 3        | 4.14/100 PY (1.31;12.57) | NR             | ETA vs ADA: ns | High                    |
|                     |                       | ADA             | 236        | 6        | 2.54/100 PY (1.14;5.65)  | NR             | ADA vs TCZ: ns |                         |
|                     |                       | ETN             | 419        | 10       | 1.91/100 PY (1.03;3.55)  | NR             | ETA vs TCZ: ns |                         |
| Grönlund 2020 (150) | JIA database, Finland | TCZ             | 56         | 11       | NR                       | No control     | No control     | High                    |

| sJIA Study       | Registry | Treatment group | N patients | N events | Incidence rate (95% CI) | age/gender aHR | RR                | Risk of bias assessment |
|------------------|----------|-----------------|------------|----------|-------------------------|----------------|-------------------|-------------------------|
| Klein 2020 (151) | BIKER    | TCZ             | 109        | 6        | 2.46/100 PY (0.90;5.35) | NR             | 2.12 (0.37;12.07) | High                    |
|                  |          | ETA             | 151        | 1        | 0.25/100 PY (0.01;1.40) | NR             | 0.14 (0.01;3.19)  |                         |
|                  |          | ANR             | 71         | 0        | NAP                     | NR             | NAP               |                         |
|                  |          | CAM             | 51         | 2        | 2.13/100 PY (0.26;7.69) | NR             | 1.65 (0.26;10.51) |                         |

Table S4.6.11.6: Safety outcomes of observational studies investigating IL-6R/L blockers in JIA regarding demyelination.

| pcJIA Study         | Registry              | Treatment group | N patients | N events | Incidence rate (95% CI) | age/gender aHR | RR               | Risk of bias assessment |
|---------------------|-----------------------|-----------------|------------|----------|-------------------------|----------------|------------------|-------------------------|
| Horneff 2016 (149)  | BIKER                 | TCZ             | 74         | 0        | NAP                     | NR             | ETA vs ADA: ns   | High                    |
|                     |                       | ADA             | 236        | 0        | NAP                     | NR             | ADA vs TCZ: ns   |                         |
|                     |                       | ETN             | 419        | 1        | 0.19/100 PY (0.03;1.35) | NR             | ETA vs TCZ: ns   |                         |
| Grönlund 2020 (150) | JIA database, Finland | TCZ             | 56         | 0        | NAP                     | No control     | No control       | High                    |
|                     |                       |                 |            |          |                         |                |                  |                         |
| sJIA Study          | Registry              | Treatment group | N patients | N events | Incidence rate (95% CI) | age/gender aHR | RR               | Risk of bias assessment |
| Klein 2020 (151)    | BIKER                 | TCZ             | 109        | 0        | NAP                     | NR             | NAP              | High                    |
|                     |                       | ETA             | 151        | 1        | 0.25/100 PY (0.01;1.40) | NR             | 0.14 (0.01;3.19) |                         |

|  |  |     |    |   |     |    |     |  |
|--|--|-----|----|---|-----|----|-----|--|
|  |  | ANR | 71 | 0 | NAP | NR | NAP |  |
|  |  | CAM | 51 | 0 | NAP | NR | NAP |  |

Table S4.6.11.7: Safety outcomes of observational studies investigating IL-6R/L blockers in JIA regarding tuberculosis.

| pcJIA Study         | Registry              | Treatment group | N patients | N events | Incidence rate (95% CI) | age/gender aHR | RR             | Risk of bias assessment |
|---------------------|-----------------------|-----------------|------------|----------|-------------------------|----------------|----------------|-------------------------|
| Horneff 2016 (149)  | BIKER                 | TCZ             | 74         | 0        | NAP                     | NR             | ETA vs ADA: ns | High                    |
|                     |                       | ADA             | 236        | 0        | NAP                     | NR             | ADA vs TCZ: ns |                         |
|                     |                       | ETN             | 419        | 0        | NAP                     | NR             | ETA vs TCZ: ns |                         |
| Grönlund 2020 (150) | JIA database, Finland | TCZ             | 56         | 0        | NAP                     | No control     | No control     | High                    |
| sJIA Study          | Registry              | Treatment group | N patients | N events | Incidence rate (95% CI) | age/gender aHR | RR             | Risk of bias assessment |
| Klein 2020 (151)    | BIKER                 | TCZ             | 109        | 0        | NAP                     | NR             | NAP            | High                    |
|                     |                       | ETA             | 151        | 0        | NAP                     | NR             | NAP            |                         |
|                     |                       | ANR             | 71         | 0        | NAP                     | NR             | NAP            |                         |
|                     |                       | CAM             | 51         | 0        | NAP                     | NR             | NAP            |                         |

Table S4.6.11.8: Safety outcomes of observational studies investigating IL-6R/L blockers in JIA regarding withdrawals.

| pcJIA Study         | Registry              | Treatment group | N patients | N (%) events | Incidence rate (95% CI) | age/gender aHR | RR; p value                                                                                                                  | Risk of bias assessment |
|---------------------|-----------------------|-----------------|------------|--------------|-------------------------|----------------|------------------------------------------------------------------------------------------------------------------------------|-------------------------|
| Horneff 2016 (149)  | BIKER                 | TCZ             | 74         | 2 (2.7)      | NR                      | NR             | ADA vs ETN: 2.28 (1.03; 5.04); 0.042<br><br>TCZ vs ADA: 0.37 (0.08; 1.79); 0.216<br><br>TCZ vs ETN: 0.84 (0.18; 4.01); 0.826 | High                    |
|                     |                       | ADA             | 236        | 15 (3.6)     | NR                      | NR             |                                                                                                                              |                         |
|                     |                       | ETN             | 419        | 15 (6.4)     | NR                      | NR             |                                                                                                                              |                         |
| Grönlund 2020 (150) | JIA database, Finland | TCZ             | 56         | 2 (12.5)     | NAP                     | No control     | No control                                                                                                                   | High                    |

Table S4.6.11.9: Safety outcomes of observational studies investigating IL-6R/L blockers in JIA regarding macrophage activation syndrome (MAS).

| sJIA Study       | Registry | Treatment group | N patients | N events | Incidence rate (95% CI) | age/gender aHR | RR               | Risk of bias assessment |
|------------------|----------|-----------------|------------|----------|-------------------------|----------------|------------------|-------------------------|
| Klein 2020 (151) | BIKER    | TCZ             | 109        | 6        | 2.46/100 PY (0.90;5.35) | NR             | 1.91 (0.49;7.46) | High                    |
|                  |          | ETA             | 151        | 2        | 0.5/100 PY (0.06;1.82)  | NR             | 0.32 (0.04;2.91) |                         |
|                  |          | ANR             | 71         | 1        | 0.83/100 PY (0.02;4.60) | NR             | 0.62 (0.08;4.93) |                         |

|  |  |     |    |   |                        |    |                  |  |
|--|--|-----|----|---|------------------------|----|------------------|--|
|  |  | CAM | 51 | 3 | 3.2/100 PY (0.66;9.33) | NR | 1.07 (0.24;4.87) |  |
|--|--|-----|----|---|------------------------|----|------------------|--|



Section 5: Characteristics of articles and abstracts included: Biomarkers for prediction of therapeutic response of interleukin-6 pathway inhibition.

Table S5.1: Overview of included studies.

| <b>Biomarker</b>       | <b>Study</b>                    | <b>Agent</b>                                 |
|------------------------|---------------------------------|----------------------------------------------|
| <b>CRP</b>             | Shafran 2020 (152)              | Tocilizumab (anti-IL-6R)                     |
| <b>IL-6</b>            | Shimamoto 2013 (153)            | Tocilizumab (anti-IL-6R)                     |
|                        | Nishimoto 2014 (DREAM) (154)    | Tocilizumab (anti-IL-6R)                     |
|                        | Strand 2020 (155)               | Sarilumab (anti-IL-6R) vs ADA (TNF-i)        |
|                        | Boyapati 2020 (156)             | Sarilumab (anti-IL-6R) vs ADA (TNF-i)        |
| <b>anti-CCP status</b> | Cappelli 2017 (157)             | Tocilizumab (anti-IL-6R)                     |
| <b>Genetic</b>         | Sanayama 2014 (158)             | Tocilizumab (anti-IL-6R)                     |
|                        | Maldonado-Montoro 2016 (159)    | Tocilizumab (anti-IL-6R)                     |
|                        | Jiménez Morales 2019 (160)      | Tocilizumab (anti-IL-6R) vs. RTX (anti-CD20) |
| <b>Cellular</b>        | Daien 2015 (161)                | Tocilizumab (anti-IL-6R) vs. TNF-i           |
|                        | Humby 2020 (ACR Abstract) (162) | Tocilizumab (anti-IL-6R) vs. RTX (anti-CD20) |
|                        | Dulic 2017 (163)                | Tocilizumab (anti-IL6R) vs. TNF-i            |
| <b>others</b>          | Gabay 2018 (164)                | Sarilumab (anti-IL-6R)                       |
|                        | Gabay 2020 (165)                | Sarilumab (anti-IL-6R) vs ADA (TNF-i)        |
|                        | Toussirot 2020 (166)            | Tocilizumab (anti-IL-6R)                     |

|                                        |                                        |                                                                  |
|----------------------------------------|----------------------------------------|------------------------------------------------------------------|
|                                        | Fioravanti 2019 (167)                  | Tocilizumab (anti-IL-6R)                                         |
|                                        | Gerasimova 2020 (EULAR Abstract) (168) | Tocilizumab (anti-IL-6R) and TOFA (JAK-i)                        |
| <b>Biometric<br/>(Body Mass Index)</b> | Gardette 2016 (169)                    | Tocilizumab (anti-IL-6R)                                         |
|                                        | Schaefer 2020 (170)                    | Tocilizumab (anti-IL-6R) vs csDMARDs vs RTX vs ABA (CD-80/CD-86) |
|                                        | Davies 2020 (EULAR Abstract) (171)     | Tocilizumab (anti-IL-6R)                                         |

Table S5.2: Outcomes of studies investigating biomarkers for prediction of therapeutic response of interleukin-6 pathway inhibition.

| Study                | Treatment group     | N patients | Biomarker     | Outcome measures                                                                                  | Results                                                                                                                                                                                                                                                                            | Conclusion                                                                                                                                               |
|----------------------|---------------------|------------|---------------|---------------------------------------------------------------------------------------------------|------------------------------------------------------------------------------------------------------------------------------------------------------------------------------------------------------------------------------------------------------------------------------------|----------------------------------------------------------------------------------------------------------------------------------------------------------|
| Shafran 2020 (152)   | TCZ pooled (8mg/kg) | 1126       | CRP           | Comparing CDAI values and change along 24 weeks follow-up to CRP values at BL or its early change | CDAI remission at wk 24 on TCZ associated with highest CRP at BL<br><br>Pat with highest DA had lowest CRP at BL<br><br>Pat with CDAI Rem at wk 24 had largest reductions of CRP by wk 4<br><br>Early CRP non-response indicative for achieving clinical treatment goals (p=0.038) | baseline CRP positive predictor of response for TCZ (negative RTX/MTX)<br><br>CRP reduction of <20% from BL by 4 wks during TCZ : poor prognostic marker |
|                      | RTX                 | 250        |               |                                                                                                   |                                                                                                                                                                                                                                                                                    |                                                                                                                                                          |
|                      | MTX                 | 249        |               |                                                                                                   |                                                                                                                                                                                                                                                                                    |                                                                                                                                                          |
| Shimamoto 2013 (153) | TCZ                 | 32         | s IL-6        | DAS 28 at BL and 4 wks after treatment                                                            | Pre-treatment IL-6 levels significant lower in TCZ responsive pts (DAS28<3.2) than TCZ-non responders                                                                                                                                                                              | low serum IL-6 is associated with a favorable response to TCZ                                                                                            |
|                      | IFX                 | 29         | TNF- $\alpha$ |                                                                                                   |                                                                                                                                                                                                                                                                                    |                                                                                                                                                          |
|                      | healthy controls    | 13         |               |                                                                                                   |                                                                                                                                                                                                                                                                                    |                                                                                                                                                          |

|                                        |                                |     |                 |                                                                                                                                                                   |                                                                                                                                                                                                                                                                                                                                                                                                                                                                                                                                                                                                           |                                                                                                                                                       |
|----------------------------------------|--------------------------------|-----|-----------------|-------------------------------------------------------------------------------------------------------------------------------------------------------------------|-----------------------------------------------------------------------------------------------------------------------------------------------------------------------------------------------------------------------------------------------------------------------------------------------------------------------------------------------------------------------------------------------------------------------------------------------------------------------------------------------------------------------------------------------------------------------------------------------------------|-------------------------------------------------------------------------------------------------------------------------------------------------------|
| Nishimoto 2014 (DREAM) (154)           | Cessation of TCZ (monotherapy) | 187 | s IL-6<br>MMP-3 | DAS-28 for 52 wks                                                                                                                                                 | Pat with low serum IL-6 (<12.9 pg/mL) and normal MMP-3 levels, the rate of continued LDA reached 38.0% at 52 weeks.                                                                                                                                                                                                                                                                                                                                                                                                                                                                                       | low serum IL-6 associated with favorable progression after TCZ cessation                                                                              |
| Strand 2020 (155)<br>MONARCH- post hoc | SAR                            | 148 | s IL-6          | HRQoL BL, wk 24 and wk 52<br><br><ul style="list-style-type: none"> <li>• Short Form 36 (SF-36)</li> <li>• (FACIT)-fatigue</li> <li>• AM stiffness VAS</li> </ul> | high baseline IL-6 levels reported better improvements in HRQoL (PCS, physical functioning domain, and AM-stiffness VAS) with SAR versus ADA                                                                                                                                                                                                                                                                                                                                                                                                                                                              | high levels of IL-6 at BL are associated with greater improvements in health-related quality of life                                                  |
|                                        | ADA                            | 152 |                 |                                                                                                                                                                   |                                                                                                                                                                                                                                                                                                                                                                                                                                                                                                                                                                                                           |                                                                                                                                                       |
| Boyapati 2020 (156)                    | SAR 200 Q2W                    | 184 | s IL-6          | Efficacy and patient-reported outcomes were compared between and within groups according to IL-6 tertile using linear and logistic regression                     | Pat. with high BL IL-6 levels (all $\geq 3$ times the upper limit of normal; n = 100): higher disease activity at BL vs pat. with low IL-6 levels (n = 100).<br><br>clinical improvement over 24 weeks with SAR versus ADA greater in pat. with high compared to low BL IL-6 levels.<br><br>MOBILITY: patients with low IL-6 levels (n = 397) vs. pat with high IL-6 levels (n = 398) higher disease activity and joint damage at BL, were more likely to have joint progression, and had less clinical improvement over 52 weeks' treatment with PBO plus MTX compared to SAR 150 mg or 200 mg plus MTX. | IL-6 may be prognostic marker of disease progression and severity<br><br>Pat. with high IL-6 levels likely to benefit from SAR compared to ADA or MTX |
|                                        | ADA 40 Q2W                     | 185 |                 |                                                                                                                                                                   |                                                                                                                                                                                                                                                                                                                                                                                                                                                                                                                                                                                                           |                                                                                                                                                       |
|                                        | SAR 150 Q2W                    | 400 |                 |                                                                                                                                                                   |                                                                                                                                                                                                                                                                                                                                                                                                                                                                                                                                                                                                           |                                                                                                                                                       |
|                                        | SAR 200 Q2W                    | 399 |                 |                                                                                                                                                                   |                                                                                                                                                                                                                                                                                                                                                                                                                                                                                                                                                                                                           |                                                                                                                                                       |
|                                        | PBO                            | 398 |                 |                                                                                                                                                                   |                                                                                                                                                                                                                                                                                                                                                                                                                                                                                                                                                                                                           |                                                                                                                                                       |

|                              |                            |                                                   |                                                     |                                                                                                                                                                     |                                                                                                                                                            |                                                                                                   |
|------------------------------|----------------------------|---------------------------------------------------|-----------------------------------------------------|---------------------------------------------------------------------------------------------------------------------------------------------------------------------|------------------------------------------------------------------------------------------------------------------------------------------------------------|---------------------------------------------------------------------------------------------------|
|                              |                            |                                                   |                                                     |                                                                                                                                                                     | BL IL-6 and C-reactive protein levels predictors of outcomes                                                                                               |                                                                                                   |
| Cappelli 2017 (157)          | TCZ                        | 316                                               | anti CCP status (negative/positive)                 | Visit 1 and 2 (4-8 months) <ul style="list-style-type: none"> <li>• Disease Activity (CDAI)</li> <li>• mDAS</li> <li>• VAS fatigue, global DA, pain, HAQ</li> </ul> | both groups significant improvement<br><br>magnitude of improvement did not differ significantly by CCP status                                             | anti CCP status did not predict treatment response                                                |
| Sanayama 2014 (158)          | TCZ                        | Training Cohort n=40<br><br>Valid.<br>Cohort n=20 | PBMC gene expression using DNA microarray           | physician's global assessment (good/moderate/no response) at 6 months                                                                                               | type I interferon response genes (IFI6, MX2, and OASL) and MT1G associated with TCZ-response                                                               | type I interferon signaling and metallothioneins are candidate biomarkers to predict TCZ-response |
| Maldonado-Montoro 2016 (159) | TCZ                        | 79                                                | gene polymorphisms                                  | EULAR response, remission, LDA and DAS28 improvement rates 6/18 months                                                                                              | GALNT18 C-allele or the CD69 A-allele associated with good TCZ response                                                                                    | genetic biomarkers could predict TCZ response                                                     |
| Jiménez Morales 2019 (160)   | TCZ                        | 87                                                | gene polymorphisms                                  | EULAR response, remission, LDA and DAS28 improvement rates at 6/12/18 months                                                                                        | FCGR3A rs396991-TT genotype treated with TCZ: higher EULAR response (OR, 5.075; 95%CI, 1.20–21.33; p = .027) at 12 months                                  | genetic biomarkers could predict TCZ response                                                     |
|                              | RTX                        | 55                                                |                                                     |                                                                                                                                                                     |                                                                                                                                                            |                                                                                                   |
| Daien 2015 (161)             | TCZ                        | 20                                                | B, T, NK and NK T (NKT) cells at BL, 3 and 6 months | DAS 28                                                                                                                                                              | Pts with TCZ significantly increased proportion of Tregs at 3 but not at 6 months.<br><br>% of NK cells higher at BL for TCZ-treated patients with disease | NK cells at baseline could be a predictive factor of TCZ response                                 |
|                              | TNFi (6 ETN, 8 CZP, 1 ADA) | 15                                                |                                                     |                                                                                                                                                                     |                                                                                                                                                            |                                                                                                   |
|                              | Controls                   | 25                                                |                                                     |                                                                                                                                                                     |                                                                                                                                                            |                                                                                                   |

|                                  |                      |    |                                                                                                                                               |                                                                                                                                      |                                                                                                                                                                                                                                                                                                                                                                                                                                            |                                                                                                                                           |
|----------------------------------|----------------------|----|-----------------------------------------------------------------------------------------------------------------------------------------------|--------------------------------------------------------------------------------------------------------------------------------------|--------------------------------------------------------------------------------------------------------------------------------------------------------------------------------------------------------------------------------------------------------------------------------------------------------------------------------------------------------------------------------------------------------------------------------------------|-------------------------------------------------------------------------------------------------------------------------------------------|
|                                  |                      |    |                                                                                                                                               |                                                                                                                                      | remission than active disease at 3 months                                                                                                                                                                                                                                                                                                                                                                                                  |                                                                                                                                           |
| Humby 2020 (ACR Abstract) (162)  | TCZ                  | 81 | Synovial tissue at trial entry histologically classified: B-cell rich (BCR) or B-cell poor (BCP)                                              | Week 16:<br>CDAI $\geq$ 50% improvement from BL and Major Treatment response (MTR)= CDAI improvement $\geq$ 50% and CDAI $\leq$ 10.1 | PEP (TCZ):<br>23 (56.1) BCP vs 16 (51.6) BCR<br>Co-PEP (TCZ):<br>19 (46.3) BCP vs. 11 (35.5) BCR                                                                                                                                                                                                                                                                                                                                           | in RA BCP population failing csDMARDs and TNFi therapy, TCZ is more effective than RTX in achieving significant falls in disease activity |
|                                  | RTX                  | 83 |                                                                                                                                               |                                                                                                                                      |                                                                                                                                                                                                                                                                                                                                                                                                                                            |                                                                                                                                           |
| Dulic 2017 (163)                 | TNF-i responders     | 30 | PBMC: helper T-cells, Th1/Th2/Th17 cells, Treg, naïve T cells, memory T-cells; before, 8 weeks and at least 6 months after biological therapy | DAS 28                                                                                                                               | % of regulatory T-cells (Tregs) becomes normal in all long-term-treated groups;<br><br>TNF-i responders/non-responders frequencies of naïve CD4+ and CD8+ cells are lower, whereas those of proinflammatory Th1, Th2, and Th17 cells and HLA-DR+-activated cells are higher than those in untreated RA or healthy controls;<br><br>TCZ responders, Th1 proportion was decreased; Th2 and Th17 is increased vs. TNF-i patients and controls | CD4CD69 ratio < 2.43 at BL, could be predictive for therapeutic response to TNF-i                                                         |
|                                  | TNF-i non responders | 19 |                                                                                                                                               |                                                                                                                                      |                                                                                                                                                                                                                                                                                                                                                                                                                                            |                                                                                                                                           |
|                                  | TCZ responders       | 43 |                                                                                                                                               |                                                                                                                                      |                                                                                                                                                                                                                                                                                                                                                                                                                                            |                                                                                                                                           |
|                                  | Treatment naïve RA   | 19 |                                                                                                                                               |                                                                                                                                      |                                                                                                                                                                                                                                                                                                                                                                                                                                            |                                                                                                                                           |
| Gabay 2018 (164) TARGET-substudy | SAR 150 q2w          | 97 |                                                                                                                                               | CDAI                                                                                                                                 |                                                                                                                                                                                                                                                                                                                                                                                                                                            | sICAM-1 was predictive of achieving LDA with SAR                                                                                          |
|                                  | SAR 200 q2w          | 97 |                                                                                                                                               |                                                                                                                                      |                                                                                                                                                                                                                                                                                                                                                                                                                                            |                                                                                                                                           |

|                                      |                          |     |                                                                                                                                                       |                  |                                                                                                                                                                                                                               |                                                                                                                                  |
|--------------------------------------|--------------------------|-----|-------------------------------------------------------------------------------------------------------------------------------------------------------|------------------|-------------------------------------------------------------------------------------------------------------------------------------------------------------------------------------------------------------------------------|----------------------------------------------------------------------------------------------------------------------------------|
|                                      | csDMARD                  | 97  | Circulating markers for synovial inflammation                                                                                                         |                  | SAR significantly decreased C1M, C3M, CXCL13, MMP-3 and total RANKL levels at wk 24 versus PBO<br><br>sICAM-1 predictive by C-reactive protein CDAI low disease activity (LDA) response in the SAR 200mg q2w group at week 12 |                                                                                                                                  |
| Gabay 2020 (165)<br>MONARCH post hoc | SAR                      | 153 | circulating biomarkers associated with acute-phase response<br>bone remodelling<br>atherothrombosis<br>anaemia of chronic disease<br>synovial markers | ACR 20<br>DAS28  | Week 24: SAR vs ADA<br>sign. ↓ CRP, SAA, RANKL, Lp(a)<br><br>sign. ↑ procollagen type 1 N-terminal propeptide (P1NP)<br><br>high baseline SAA, CRP (MMP-3) more likely for clinical improvement and PRO SAR vs. ADA           | SAR associated with greater positive effects on bone remodelling, synovial inflammation and cardiovascular risk vs. ADA          |
|                                      | ADA                      | 154 |                                                                                                                                                       |                  |                                                                                                                                                                                                                               |                                                                                                                                  |
| Toussirot 2020 (166)                 | csDMARD/bDMARD<br>IR→TCZ | 107 | BMI<br>Lipid and metabolic parameters<br>Body composition                                                                                             | BL, 1/3/6 months | signif. ↑ in total and HMW adiponectin at the onset of treatment<br><br>significant ↑ in lean mass, while fat mass did not change                                                                                             | ↑ adiponectin levels could have positive effects on the CV risk<br><br>TCZ may have anabolic impact on lean mass/skeletal muscle |
| Fioravanti 2019 (167)                | TCZ                      | 44  | Lipid and metabolic parameters BL and 6 months                                                                                                        | DAS 28<br>HAQ    | signif. ↑ total cholesterol<br><br>signif. ↑ adiponectin                                                                                                                                                                      | ↑ adiponectin levels could have positive effects on the CV risk                                                                  |

|                                              |              |      |                                                        |                                                     |                                                                                                                                                                                       |                                                           |
|----------------------------------------------|--------------|------|--------------------------------------------------------|-----------------------------------------------------|---------------------------------------------------------------------------------------------------------------------------------------------------------------------------------------|-----------------------------------------------------------|
|                                              |              |      |                                                        |                                                     | signif. ↓ chemerin<br>no significant correlations with clinical and biochemical parameters                                                                                            |                                                           |
| Gerasimova 2020<br>(EULAR Abstract)<br>(168) | TCZ          | 29   | NT-proBNP in pts with no history of CVD and normal TTE | DAS 28                                              | ↓ NT-proBNP associated with positive dynamics DAS 28 and inflammatory markers (CRP, ESR)                                                                                              | ↑ NT-proBNP considered as a component of disease activity |
|                                              | TOFA         | 31   |                                                        |                                                     |                                                                                                                                                                                       |                                                           |
| Gardette 2016<br>(169)                       | TCZ          | 115  | BMI BL and after 6 months                              | ↓ DAS28 ≥ 1.2<br>EULAR good response<br>DAS28 < 2.6 | median BMI did not differ between responders and non-responders for DAS28                                                                                                             | BMI did not affect the response to TCZ in RA              |
| Schaefer 2020<br>(170)<br>RABBIT Registry    | TCZ          | 1173 | BMI                                                    | DAS28-ESR improvement after 6 months of treatment   | Obesity BMI 30 kg/m <sup>2</sup> reduced real-world effectiveness of TCZ<br>-0.22 (95% CI: -0.42; -0.03) units for women and -0.41 (95% CI: -0.74; -0.07) units for men receiving TCZ | Obesity has a negative impact on the effectiveness of TCZ |
| Davies 2020<br>(EULAR Abstract)<br>(171)     | TCZ IV or SC | 1241 | BMI                                                    | DAS28-ESR improvement after 6 months of treatment   | no significant effect of BMI in change of DAS28 for pat starting IV or SC TCZ                                                                                                         | BMI does not affect initial response to IV or SC TCZ      |

Section 6: Characteristics of articles and abstracts included: Patient adherence/preferences and economic aspects of interleukin-6 pathway inhibition.

Table S6.1: Outcomes of studies investigating patient adherence and preferences in patients treated with IL-6R/L blockers.

| RA Study                           | Registry/trial   | Treatment group | N patients                          | Outcome measures                                            | Results                                                                                                                                                                                                                                                                            | Conclusion                                                                                                                                                        |
|------------------------------------|------------------|-----------------|-------------------------------------|-------------------------------------------------------------|------------------------------------------------------------------------------------------------------------------------------------------------------------------------------------------------------------------------------------------------------------------------------------|-------------------------------------------------------------------------------------------------------------------------------------------------------------------|
| Forsblad-d'Elia 2015 (172)         | ARTIS            | TCZ             | 530                                 | Adherence/drug continuation<br>Predictors for discontinuing | 6 month, 1 and 2 year estimated drug continuations were 79%, 64% and 50%<br><br>Predictors:<br><ul style="list-style-type: none"> <li>low initial CRP:<br/>HR 0.76 (0.63;0.91)</li> <li>high HAQ:<br/>HR 1.23 (1.06;1.44)</li> <li>prior bDMARD<br/>HR 1.43 (1.12;1.83)</li> </ul> | TCZ discontinuation was predicted by low CRP, high HAQ and exposure to biologics in RA                                                                            |
| Pappas 2020 (EULAR Abstract) (173) | CORRONA registry | TCZ             | 1789<br>N=1303 with reported reason | Adherence/drug continuation<br>Predictors for discontinuing | median (95% CI) duration of persistence: 46 (38 to 55) mths<br><br>Predictors:<br><ul style="list-style-type: none"> <li>Smoking previous or current:<br/>HR 1.32 (1.03;1.75)</li> <li>use of 1 prior non-TNFi:<br/>HR 1.25 (1.03;1.52)</li> </ul>                                 | TCZ most frequently initiated after IR to $\geq 2$ bDMARDs<br><br>Smoking, use of 1 prior non-TNFi and higher baseline pain score associated with discontinuation |



|                                    |                                               |     |                                 |                                                                  |                                                                                                                                                                                                            |                                                                                                                                                                                                             |
|------------------------------------|-----------------------------------------------|-----|---------------------------------|------------------------------------------------------------------|------------------------------------------------------------------------------------------------------------------------------------------------------------------------------------------------------------|-------------------------------------------------------------------------------------------------------------------------------------------------------------------------------------------------------------|
|                                    |                                               |     |                                 |                                                                  | <ul style="list-style-type: none"> <li>• Patient pain:<br/>HR 1.07 (1.01;1.22)</li> <li>• IV TCZ: no insurance:<br/>HR 2.51 (1.02; 6.18)</li> <li>• high fatigue at BL:<br/>HR 1.04 (1.00;1.08)</li> </ul> |                                                                                                                                                                                                             |
| Best 2020 (174)                    | US data: ≥1 bDMARD-IR<br>MarketScan, Medicare | TCZ | 1630                            | Days of prim. persistence: adjusted mean (95% CI)                | TCZ 333 (311–356)                                                                                                                                                                                          | among patients with RA with ≥1 bDMARD-IR pat with TCZ exhibited a similar or significantly better bDMARD persistence                                                                                        |
|                                    |                                               | GOL | 745                             |                                                                  | ADA 280 (268–293)                                                                                                                                                                                          |                                                                                                                                                                                                             |
|                                    |                                               | ETA | 2760                            |                                                                  | CZP 262 (241–284)                                                                                                                                                                                          |                                                                                                                                                                                                             |
|                                    |                                               | CZP | 982                             |                                                                  | ETA 289 (274–304)                                                                                                                                                                                          |                                                                                                                                                                                                             |
|                                    |                                               | ADA | 3599                            |                                                                  | ABA 320 (305–335)                                                                                                                                                                                          |                                                                                                                                                                                                             |
|                                    |                                               | ABA | 2899                            |                                                                  | GOL 304 (274–333)                                                                                                                                                                                          |                                                                                                                                                                                                             |
| Saraux 2019 (EULAR Abstract) (175) | multicenter, observational                    | TCZ | 291                             | drug retention rate of TCZ sc at 12 months<br><br>QoL using EQ5D | drug retention rate month 12 63.6%; 62.6% in Mono, 64.3% in csDMARD combination<br><br>EQ-5D improved in all domains with a change from baseline of 0.11 ±0.29                                             | at 12 months, drug retention rate was 63.6% in patients receiving TCZ SC in real life, with no difference between monotherapy and combination with csDMARDs groups<br><br>QoL improved in all EQ-5D domains |
| Haraoui 2019 (176)                 | multicenter, observational                    | TCZ | n= 639 Mono<br><br>n=1273 Combi | drug retention rate after 6 months                               | 1504 patients (78.7%) continued to receive TCZ<br><br>no difference between bDMARD exposed or naïve or combination vs mono                                                                                 | in routine clinical practice, TCZ discontinuation rates were low and unaffected by prior use of bDMARDs;                                                                                                    |

|                   |                            |             |         |                                                                                                                                                                                                                    |                                                                                                                                                                                                                                                                                                                                                                                               |                                                                                                                                                                                                                                            |
|-------------------|----------------------------|-------------|---------|--------------------------------------------------------------------------------------------------------------------------------------------------------------------------------------------------------------------|-----------------------------------------------------------------------------------------------------------------------------------------------------------------------------------------------------------------------------------------------------------------------------------------------------------------------------------------------------------------------------------------------|--------------------------------------------------------------------------------------------------------------------------------------------------------------------------------------------------------------------------------------------|
|                   |                            |             |         |                                                                                                                                                                                                                    |                                                                                                                                                                                                                                                                                                                                                                                               | PROs in bDMARD naïve were numerically better                                                                                                                                                                                               |
| Tanaka 2018 (177) | multicenter, observational | TCZ SC      | 377     | change in % overall work impairment (OWI) among PWs at week 52 assessed using the Work Productivity and Activity Impairment Questionnaire (WPAI)                                                                   | OWI at week 52: <ul style="list-style-type: none"> <li>-18.9% (TCZ-SC group) and -19.0% (csDMARDs group) (ns)</li> <li>WPAI activity impairment in the overall group and HWs for TCZ significant better than csDMARD</li> <li>TCZ-SC-treated HWs sign. Improvement in QoL</li> <li>no difference in PW regarding QoL</li> </ul>                                                               | despite lack of differences in OWI between groups at week 52, overall group (particularly HWs) receiving TCZ-SC in addition to csDMARDs showed significant improvements in activity impairment, disease activity, and QoL vs csDMARD alone |
|                   |                            | csDMARD     | 347     |                                                                                                                                                                                                                    |                                                                                                                                                                                                                                                                                                                                                                                               |                                                                                                                                                                                                                                            |
| Strand 2017 (178) | ADACTA<br>AMBITION         | TCZ vs. ADA | 265/259 | PtGA<br>(FACIT)-Fatigue<br>SF-36<br><br>% of pat with improvements from baseline $\geq$ minimum clinically important differences (MCID) for each PRO<br><br>$\geq$ age-matched and gender-matched normative values | ADACTA <ul style="list-style-type: none"> <li>TCZ sign greater improvements in PtGA, pain, SF-36,</li> <li>more TCZ-treated patients reported improvements <math>\geq</math> MCID, and reported scores <math>\geq</math> normative values across all PROs vs ADA.</li> </ul><br>AMBITION <ul style="list-style-type: none"> <li>TCZ significant improvement in HAQ, fatigue, SF-36</li> </ul> | TCZ monotherapy resulted in more patients reporting clinically meaningful PRO improvements and PRO scores $\geq$ normative values compared with MTX or ADA monotherapy                                                                     |
|                   |                            | TCZ vs. MTX | 163/162 |                                                                                                                                                                                                                    |                                                                                                                                                                                                                                                                                                                                                                                               |                                                                                                                                                                                                                                            |

|                    |                                |                  |     |                                                                                                                                                             |                                                                                                                                                                                                                                                                                                                                                                                                              |                                                                                                                                                                                             |
|--------------------|--------------------------------|------------------|-----|-------------------------------------------------------------------------------------------------------------------------------------------------------------|--------------------------------------------------------------------------------------------------------------------------------------------------------------------------------------------------------------------------------------------------------------------------------------------------------------------------------------------------------------------------------------------------------------|---------------------------------------------------------------------------------------------------------------------------------------------------------------------------------------------|
|                    |                                |                  |     |                                                                                                                                                             | <ul style="list-style-type: none"> <li>• <math>\geq</math>MCID and reported scores <math>\geq</math>normative values across all PROs vs MTX</li> </ul>                                                                                                                                                                                                                                                       |                                                                                                                                                                                             |
| Strand 2018a (179) | MONARCH                        | SAR              | 184 | PtGA                                                                                                                                                        | at week 24:<br>SAR: sign. Improvement vs ADA in <ul style="list-style-type: none"> <li>• HAQ, PtGA, pain VAS, MS VAS, SF-36 PCS, WPS-RA</li> </ul>                                                                                                                                                                                                                                                           | SAR monotherapy resulted in greater improvements across multiple PROs than ADA mono                                                                                                         |
|                    |                                | ADA              | 185 | VAS pain<br>Chronic Illness Therapy-Fatigue (FACIT-F)<br>SF-36<br>HAQ<br>Rheumatoid Arthritis Impact of Disease (RAID)<br>Work Productivity Survey (WPS-RA) |                                                                                                                                                                                                                                                                                                                                                                                                              |                                                                                                                                                                                             |
| Strand 2018b (180) | OPTION<br>BREVACTA<br>SUMMACTA | OPTION: TCZ IV   | 205 | PtGA                                                                                                                                                        | Pat. with TCZ-IV reported improvements in PROs $\geq$ MCID (50%-82% vs 31%-57%) and scores $\geq$ normative values (16%-44% vs 5%-28%) at week 16 vs PBO.<br><br>greater % of pat. in BREVACTA with TCZ-SC reported improvements $\geq$ MCID (54%-73% vs 42%-55%) and scores $\geq$ normative values (8%-34% vs 4%-25%) at week 12 vs. PBO;<br><br>SUMMACTA: 61%-84% of pat. with TCZ-SC and 64%-84% of pat. | TCZ-IV or TCZ-SC with csDMARDs: more pat. reported clinically meaningful improvements and PRO scores $\geq$ normative values compared with PBO; improvements similar with TCZ-IV and TCZ-SC |
|                    |                                | OPTION: PBO      | 204 | VAS pain                                                                                                                                                    |                                                                                                                                                                                                                                                                                                                                                                                                              |                                                                                                                                                                                             |
|                    |                                | BREVACTA: TCZ SC | 437 | Chronic Illness Therapy-Fatigue (FACIT-F)                                                                                                                   |                                                                                                                                                                                                                                                                                                                                                                                                              |                                                                                                                                                                                             |
|                    |                                | BREVACTA: PBO    | 219 | SF-36                                                                                                                                                       |                                                                                                                                                                                                                                                                                                                                                                                                              |                                                                                                                                                                                             |
|                    |                                | SUMMACTA: TCZ SC | 558 | HAQ                                                                                                                                                         |                                                                                                                                                                                                                                                                                                                                                                                                              |                                                                                                                                                                                             |
|                    |                                | SUMMACTA: TCZ IV | 537 | % of pat with improvements from baseline $\geq$ minimum clinically important                                                                                |                                                                                                                                                                                                                                                                                                                                                                                                              |                                                                                                                                                                                             |

|                   |                |                  |            | differences (MCID) for each PRO<br><br>≥age-matched and gender-matched normative values | treated with TCZ-IV reported improvements ≥ MCID and 14%-41% and 15%-24%, respectively, scores ≥ normative values at week 24                                                                                                                                                                                                                                                                                                                                                                                                                                            |                                                                                                                                                                                     |
|-------------------|----------------|------------------|------------|-----------------------------------------------------------------------------------------|-------------------------------------------------------------------------------------------------------------------------------------------------------------------------------------------------------------------------------------------------------------------------------------------------------------------------------------------------------------------------------------------------------------------------------------------------------------------------------------------------------------------------------------------------------------------------|-------------------------------------------------------------------------------------------------------------------------------------------------------------------------------------|
|                   |                |                  |            |                                                                                         |                                                                                                                                                                                                                                                                                                                                                                                                                                                                                                                                                                         |                                                                                                                                                                                     |
| GCA Study         | Registry/trial | Treatment group  | N patients | Outcome measures                                                                        | Results                                                                                                                                                                                                                                                                                                                                                                                                                                                                                                                                                                 | Conclusion                                                                                                                                                                          |
| Strand 2019 (181) | GiACTA         | TCZ-QW + Pred-26 | 100        | SF-36 PCS and MCS and all eight individual domains                                      | TCZ-QW + Pred-26: signif. greater improvement in 4/8 SF-36 domains vs PBO + Pred-26 and 6/8 domains compared with PBO + Pred-52 (p < 0.01). I<br><br>improvement with TCZ-QW + Pred-26 met or exceeded minimum clinically important differences (MCID) in all 8 domains compared with 5 domains with PBO + Pred-26 and 0 with PBO + Pred-52<br><br>Domain scores in TCZ-QW + Pred-26 group at wk 52 met or exceeded age- and gender-matched normative values (A/G norms)<br><br>LSM changes from BL in FACIT-Fatigue scores increased significantly with TCZ-QW + Pred- | pat. with TCZ-QW + Pred-26 reported statistically significant and clinically meaningful improvement in SF-36 and FACIT-Fatigue scores compared with those receiving prednisone only |
|                   |                | PBO + Pred-26    | 50         |                                                                                         |                                                                                                                                                                                                                                                                                                                                                                                                                                                                                                                                                                         |                                                                                                                                                                                     |
|                   |                | PBO + Pred-52    | 51         | PtGA<br><br>FACIT-Fatigue                                                               |                                                                                                                                                                                                                                                                                                                                                                                                                                                                                                                                                                         |                                                                                                                                                                                     |

|                 |                |                 |            |                                    | 26, exceeding MCID and A/G norms ( $p < 0.001$ )                                                                                                                           |                                                                                                                                                        |
|-----------------|----------------|-----------------|------------|------------------------------------|----------------------------------------------------------------------------------------------------------------------------------------------------------------------------|--------------------------------------------------------------------------------------------------------------------------------------------------------|
| JIA Study       | Registry/trial | Treatment group | N patients | Outcome measures                   | Results                                                                                                                                                                    | Conclusion                                                                                                                                             |
| Ayaz 2020 (182) | Single center  | TCZ             | 9          | JADAS71 satisfaction questionnaire | no deterioration in terms of active joint counts, physician's VAS, patient's VAS and JADAS71. satisfaction in life quality, school success and reduced school absenteeism. | TCZ effective treatment option in JIA and switching from IV to SC route when necessary was found to be an effective and acceptable alternative by pat. |

Table S6.2: Outcomes of studies investigating economic aspects of treatment with IL-6R/L blockers.

| Study               | Registry/trial                                                                                       | Treatment group | N patients | Outcome measures                                                                                          | Results                                                                                                                                             | Conclusion                                                                                                            |
|---------------------|------------------------------------------------------------------------------------------------------|-----------------|------------|-----------------------------------------------------------------------------------------------------------|-----------------------------------------------------------------------------------------------------------------------------------------------------|-----------------------------------------------------------------------------------------------------------------------|
| Soini 2012 (183)    | Patient profiles (OPTION, TOWARD, LITHE) for a probabilistic microsimulation model $\geq$ csDMARD-IR | TCZ             | 3000       | $\Delta$ costs and QALYs<br>ACR 20/50/70                                                                  | TCZ+MTX more cost-effective than ADA+MTX or ETN+MTX or MTX alone                                                                                    | Tocilizumab + MTX is a potentially cost-effective bDMARD treatment for moderate-to-severe rheumatoid arthritis (msRA) |
|                     |                                                                                                      | ADA             |            |                                                                                                           |                                                                                                                                                     |                                                                                                                       |
|                     |                                                                                                      | ETN             |            |                                                                                                           |                                                                                                                                                     |                                                                                                                       |
| Johnston 2015 (184) | MarketScan<br>Medicare                                                                               | TCZ             | 1090       | per-patient per-month (PPPM) healthcare costs, including biologic costs, RA-related healthcare costs, and | TCZ had significantly lower (all $P < 0.05$ ) PPPM biologic costs (ABA = \$2,597, IFX = \$3,141, TCZ = \$1,894)<br>RA-related healthcare costs (ABA | TCZ had the lowest real-world healthcare costs, largely driven by lower costs directly related to bDMARD treatment    |
|                     |                                                                                                      | ABA             | 1759       |                                                                                                           |                                                                                                                                                     |                                                                                                                       |
|                     |                                                                                                      | IFX             | 922        |                                                                                                           |                                                                                                                                                     |                                                                                                                       |

|                      |                                                                                                                      |                                                                              |            |                                                                                                                                           |                                                                                                                                                                                                                                                                                                                  |                                                                                                                             |
|----------------------|----------------------------------------------------------------------------------------------------------------------|------------------------------------------------------------------------------|------------|-------------------------------------------------------------------------------------------------------------------------------------------|------------------------------------------------------------------------------------------------------------------------------------------------------------------------------------------------------------------------------------------------------------------------------------------------------------------|-----------------------------------------------------------------------------------------------------------------------------|
|                      |                                                                                                                      |                                                                              |            | all-cause healthcare costs                                                                                                                | = \$2,929, IFX = \$3,598, TCZ = \$2,236), and all-cause healthcare costs (ABA = \$3,735, IFX = \$4,600, TCZ = \$3,042)                                                                                                                                                                                           |                                                                                                                             |
| Verhoeven 2020 (185) | U-ACT Early                                                                                                          | TCZ                                                                          | total 317  | QALYs calculated based on the EQ5D<br><br>Δ costs and QALYs calculated for TCZ+MTX vs. MTX and TCZ vs. MTX over 2 and 5 year time horizon | QALYs increased between 2 and 5 years, without becoming statistically significant:<br><br>TCZ+MTX vs. MTX: 0.06 (-0.10; 0.22)<br>TCZ vs. MTX: -0.03 (-0.20; 0.13)<br><br>probability of TCZ (+MTX) being cost-effective intervention over 5 years, using different WTP thresholds for a QALY, was in general low | early initiation TCZ ± MTX, is not cost-effective vs MTX initiation in a step-up T2T strategy over 2 or 5 years in early RA |
|                      |                                                                                                                      | TCZ+MTX                                                                      |            |                                                                                                                                           |                                                                                                                                                                                                                                                                                                                  |                                                                                                                             |
|                      |                                                                                                                      | MTX                                                                          |            |                                                                                                                                           |                                                                                                                                                                                                                                                                                                                  |                                                                                                                             |
| Best 2020 (186)      | ADACTA                                                                                                               | TCZ                                                                          | 163        | patient-level drug costs                                                                                                                  | mean drug and administration costs per each clinical response achieved were lower with TCZ vs ADA                                                                                                                                                                                                                | in comparative assessment, the cost to achieve all 4 clinical endpoints was lower for TCZ vs ADA                            |
|                      |                                                                                                                      | ADA                                                                          | 162        | cost of hospitalization due to AE<br><br>cost per response (DAS28, ACR20/50/70)                                                           |                                                                                                                                                                                                                                                                                                                  |                                                                                                                             |
| Muszbek 2019 (187)   | Microsimulation based on patient profiles from MOBILITY<br><br>via a 6-month decision tree and lifetime Markov model | SAR 150<br>SAR 200<br>MTX<br><br>treatment comparators in the model included | total 1197 | QALYs were estimated via mapping 6-month ACR20/50/70 response to relative change in HAQ                                                   | Lifetime QALYs and costs for treatment sequences on the efficiency frontier were 3.43 and \$115,019 for active csDMARD, 5.79 and \$430,918 for SAR, and 5.94 and \$524,832 for etanercept (all others dominated).                                                                                                | SAR dominated ADA, CZP, GOL and TOFA treatment sequences (i.e., more effective and less costly)                             |

|  |  |                                         |  |  |                                                              |  |
|--|--|-----------------------------------------|--|--|--------------------------------------------------------------|--|
|  |  | bDMARDs and the<br>tsDMARD, tofacitinib |  |  | SAR vs TCZ and DMARD:<br>\$84,079/QALY and<br>\$134,286/QALY |  |
|--|--|-----------------------------------------|--|--|--------------------------------------------------------------|--|

Section 7: Figures and tables for colorblind persons

Figure S7.1: Efficacy of biological disease modifying anti-rheumatic drugs targeting the IL-6 receptor or ligand and their relative efficacy and or regulatory approvals

| Disease with approval                              | bDMARD targeting IL-6 receptor or IL-6 ligand |                      |           |              |               |                  |              |                      |                   |             |
|----------------------------------------------------|-----------------------------------------------|----------------------|-----------|--------------|---------------|------------------|--------------|----------------------|-------------------|-------------|
|                                                    | anti-IL-6 receptor                            |                      |           |              |               | anti-IL-6 ligand |              |                      |                   |             |
|                                                    | Tocilizumab                                   | Sarilumab            | Levilimab | Satralizumab | Vobarilizumab | Olokizumab       | Clazakizumab | Sirukumab            | Siltuximab        | PF-04236921 |
| Rheumatoid arthritis (RA)                          | Approved                                      | Approved             | Phase 2   |              | Phase 2       | Phase 3          | Phase 2      | Phase 3              |                   | Phase 1     |
| Systemic juvenile idiopathic arthritis (sJIA)      | Approved                                      | Phase 2 <sup>a</sup> |           |              |               |                  |              |                      |                   |             |
| Polyarticular-course JIA (pcJIA)                   | Approved                                      | Phase 2 <sup>b</sup> |           |              |               |                  |              |                      |                   |             |
| Adult-onset Still's disease (AoSD)                 | Approved (JPN)                                |                      |           |              |               |                  |              |                      |                   |             |
| Giant cell arteritis (GCA)                         | Approved                                      | Phase 3 <sup>c</sup> |           |              |               |                  |              | Phase 3 <sup>d</sup> |                   |             |
| Takayasu arteritis (TAK)                           | Approved (JPN)                                |                      |           |              |               |                  |              |                      |                   |             |
| Multicentric Castleman's disease (MCD)             | Approved (JPN)                                |                      |           |              |               |                  |              |                      | Approved (US, EU) |             |
| CAR-T cell induced Cytokine Release Syndrome (CRS) | Approved                                      |                      |           |              |               |                  |              |                      |                   |             |
| Neuromyelitis optica spectrum disorders (NMOSD)    | Phase 2/3                                     |                      |           | Approved     |               |                  |              |                      |                   |             |

  

|                                                            |  |
|------------------------------------------------------------|--|
| Approved and solid evidence for efficacy                   |  |
| Approved but no significant difference compared to placebo |  |
| Not approved but evidence for efficacy                     |  |
| Clinical trial recruiting participants                     |  |
| Clinical trial terminated                                  |  |
| Mixed results across trials                                |  |
| Not evaluated/reported                                     |  |



Table S7.2: Efficacy outcomes of clinical trials published from 2012 to 2020 investigating biologic disease modifying antirheumatic drugs (bDMARDs) specifically inhibiting IL-6 receptor or ligand compared against placebo or control group, shown across other studied immune-mediated diseases.

| Disease                                            | Study                                                      | Target | Population                                                               | Intervention / Control    | Primary endpoint                                                                                                                                  | Efficacy                                                       |
|----------------------------------------------------|------------------------------------------------------------|--------|--------------------------------------------------------------------------|---------------------------|---------------------------------------------------------------------------------------------------------------------------------------------------|----------------------------------------------------------------|
| Psoriatic arthritis                                | Mease et al. 2016 phase 2b                                 | IL-6   | NSAID-IR and/or csDMARD bDMARD naïve                                     | CLZ vs PBO                | ACR 20 response at week 16                                                                                                                        | no difference compared to placebo/control group                |
| Ankylosing spondylitis                             | Sieper et al. 2014 (BUILDER) phase 2/3                     | IL-6R  | TNFi-naïve                                                               | TCZ vs PBO                | ASAS 20 response at week 12                                                                                                                       |                                                                |
|                                                    | Sieper et al. 2015 (ALIGN) phase 2                         |        | NSAID-IR                                                                 | SAR vs PBO                | ASAS 20 response at week 12                                                                                                                       |                                                                |
| Osteoarthritis                                     | Richette et al. 2020 (TIDOA) phase 3                       | IL-6R  | refractory to analgetics                                                 | TCZ vs PBO                | ΔVAS pain at week 6                                                                                                                               |                                                                |
| Systemic lupus erythematosus                       | Wallace et al. 2017 (BUTTERFLY) phase 2                    | IL-6   | active disease (SLEDAI-2K/BILAG)                                         | PF-04236921 vs PBO        | SLE Responder Index (SRI-4) at week 24                                                                                                            |                                                                |
|                                                    | Rovin et al. 2016 phase 2                                  |        | class III or class IV Lupus nephritis                                    | SIR vs PBO                | reduction in proteinuria from baseline to week 24                                                                                                 |                                                                |
|                                                    | NCT02437890 phase 2                                        | IL-6R  | moderate to severe active SLE                                            | ALX-0061 vs PBO           | mBICLA response rate at week 24                                                                                                                   |                                                                |
| Myositis                                           | NCT02043548 phase 2                                        | IL-6R  | refractory PM/DM                                                         | TCZ vs PBO                | Mean Total Improvement Scores at visits 2-7                                                                                                       |                                                                |
| Sjögren's syndrome                                 | Felten et al. 2020 (ETAP) phase 2/3                        | IL-6R  | ESSDAI ≥ 5                                                               | TCZ vs PBO                | Response to treatment at week 24*                                                                                                                 |                                                                |
| Multiple Myeloma                                   | San-Miguel et al. 2014 phase 2                             | IL-6   | untreated MM and no candidate for stem cell transplantation              | SIL +VMP vs VMP           | Complete response rate**                                                                                                                          |                                                                |
|                                                    | Brighton et al. 2019 phase 2                               |        | high-Risk Smoldering multiple Myeloma                                    | SIL vs PBO                | 1-year progression-free survival rate                                                                                                             |                                                                |
| Systemic sclerosis associated ILD                  | Khanna et al. 2020 (focuSSced) phase 3                     | IL-6R  | diffuse cutaneous-SSc; mRSS 10-35; inflammatory status                   | TCZ vs PBO                | ΔmRSS from baseline to week 48; secondary outcome: ΔFVC% predicted from baseline to week 48                                                       | promising results or rather mixed results across groups/trials |
| Late Antibody-Mediated Kidney Transplant Rejection | Doberer et al. 2020 phase 2                                | IL-6   | kidney transplant recipients with donor-specific, antibody-positive ABMR | CLZ vs PBO                | safety and tolerability; secondary outcomes: course of eGFR, protein/creatinine ratio                                                             |                                                                |
| AA-Amyloidosis                                     | Okuda et al. 2014/2016 retrospective analyses              | IL-6R  | Amyloid A (AA) amyloidosis complicating rheumatic diseases               | TCZ vs TNFi               | Outcomes: retention rate, median ΔSAA, median ΔeGFR, mean ΔCDAI, mean ΔGC dose                                                                    |                                                                |
| Polymyalgia rheumatica                             | Lally et al. 2016 open label, phase 2a                     | IL-6R  | PMR treated with GCs for ≤ 4 weeks                                       | TCZ+GC vs GC              | relapse-free remission without GC treatment at 6 months                                                                                           | superior versus control                                        |
|                                                    | Devauchelle-Pensec et al. 2016 (TENOR) open label, phase 2 |        | active disease defined as PMR-AS≥10                                      | TCZ mono no control group | PMR-AS≤10 at week 12                                                                                                                              |                                                                |
| COVID-19 CRS/pneumonia                             | Hermine et al. 2020 (CORIMUNO-TOCI 1), open-label          | IL-6R  | moderate to severe pneumonia                                             | TCZ + SOC vs SOC          | (1) %patients dead or needing NIV or mechanic ventilation on day 4 (scores >5 on WHO-CPS); and (2) survival without need of ventilation at day 14 | promising results or rather mixed results across groups/trials |
|                                                    | Salvarani et al. 2020 (RCT-TCZ-COVID-19), open-label       |        | mild pneumonia                                                           | TCZ + SOC vs SOC          | clinical worsening within 14 days***                                                                                                              |                                                                |
|                                                    | Stone et al. 2020 (BACC Bay Tocilizumab Trial), phase 3    |        | mild pneumonia                                                           | TCZ + SOC vs PBO + SOC    | mechanical ventilation or death (time frame: 28 days)                                                                                             |                                                                |

## Section 8 References

1. Huizinga TWJ, Fleischmann RM, Jasson M, Radin AR, Van Adelsberg J, Fiore S, et al. Sarilumab, a fully human monoclonal antibody against IL-6R alpha in patients with rheumatoid arthritis and an inadequate response to methotrexate: efficacy and safety results from the randomised SARIL-RA-MOBILITY part a trial. *Annals of the rheumatic diseases*. 2014;73(9):1626-34.
2. Genovese MC, Fleischmann R, Kivitz AJ, Rell-Bakalarska M, Martincova R, Fiore S, et al. Sarilumab Plus Methotrexate in Patients With Active Rheumatoid Arthritis and Inadequate Response to Methotrexate: Results of a Phase III Study. *Arthritis & Rheumatology*. 2015;67(6):1424-37.
3. Tanaka Y, Wada K, Takahashi Y, Hagino O, van Hoogstraten H, Graham NMH, et al. Sarilumab plus methotrexate in patients with active rheumatoid arthritis and inadequate response to methotrexate: results of a randomized, placebo-controlled phase III trial in Japan. *Arthritis Research & Therapy*. 2019;21(1):79.
4. Mazurov V, Zotkin E, Ilivanova E, Kropotina T, Plaksina T, Nesmeyanova O, et al. Efficacy of levilimab, novel monoclonal anti-IL-6 receptor antibody, in combination with methotrexate in patients with rheumatoid arthritis: 1-year results of phase 2 aurora study. *Annals of the Rheumatic Diseases Conference: annual european congress of rheumatology of the european league against rheumatism, EULAR 2020, Germany*. 2020;79(SUPPL 1):637-8.
5. Ablynx. A Dose-Range Finding Study for ALX-0061 Combination Therapy in Subjects With Rheumatoid Arthritis. Available: <https://clinicaltrials.gov/ct2/show/NCT02309359> [Accessed 09 Nov 2020].
6. Ablynx A Phase IIb Study for ALX-0061 Monotherapy in Subjects With Rheumatoid Arthritis Available: <https://clinicaltrials.gov/ct2/show/study/NCT02287922> [Accessed 09 Nov 2021].
7. Nasonov E, Stoilov R, Tyabut T, Genovese MC. Olokizumab, monoclonal antibody against il6, in patients with moderately to severely active rheumatoid arthritis inadequately controlled by methotrexate: Efficacy and safety results of phase III credo-1 study. *Annals of the Rheumatic Diseases Conference: annual european congress of rheumatology of the european league against rheumatism, EULAR 2020, Germany*. 2020;79(SUPPL 1):16-7.
8. Mease PJ, Strand V, Shalamberidze L, Dimic A, Raskina T, Xu LA, et al. A phase II, double-blind, randomised, placebo-controlled study of BMS945429 (ALD518) in patients with rheumatoid arthritis with an inadequate response to methotrexate. *Annals of the Rheumatic Diseases*. 2012;71(7):1183-9.
9. Baek HJ, Lim MJ, Park W, Park SH, Shim SC, Yoo DH, et al. Efficacy and safety of tocilizumab in Korean patients with active rheumatoid arthritis. *Korean Journal of Internal Medicine*. 2019;34(4):917-31.
10. Hoffmann-La Roche. A Study of Tocilizumab in Combination With DMARD Therapy in Patients With Active Rheumatoid Arthritis. Available: <https://clinicaltrials.gov/ct2/show/NCT00773461> [Accessed 10 Nov 2020].
11. Takeuchi T, Thorne C, Karpouzas G, Sheng S, Xu W, Rao R, et al. Sirukumab for rheumatoid arthritis: the phase III SIRROUND-D study. *Annals of the Rheumatic Diseases*. 2017;76(12):2001-8.
12. Fleischmann R, van Adelsberg J, Lin Y, Castelar-Pinheiro GDR, Brzezicki J, Hrycaj P, et al. Sarilumab and Nonbiologic Disease-Modifying Antirheumatic Drugs in Patients With Active Rheumatoid Arthritis and Inadequate Response or Intolerance to Tumor Necrosis Factor Inhibitors. *Arthritis and Rheumatology*. 2017;69(2):277-90.
13. Takeuchi T, Tanaka Y, Yamanaka H, Amano K, Nagamine R, Park W, et al. Efficacy and safety of olokizumab in Asian patients with moderate-to-severe rheumatoid arthritis, previously exposed to anti-TNF therapy: Results from a randomized phase II trial. *Modern Rheumatology*. 2016;26(1):15-23.
14. Aletaha D, Bingham CO, 3rd, Tanaka Y, Agarwal P, Kurrasch R, Tak PP, et al. Efficacy and safety of sirukumab in patients with active rheumatoid arthritis refractory to anti-TNF therapy (SIRROUND-T): a randomised, double-blind, placebo-controlled, parallel-group, multinational, phase 3 study. *Lancet*. 2017;389(10075):1206-17.

15. Genovese MC, Fleischmann R, Furst D, Janssen N, Carter J, Dasgupta B, et al. Efficacy and safety of olokizumab in patients with rheumatoid arthritis with an inadequate response to TNF inhibitor therapy: outcomes of a randomised Phase IIb study. *Annals of the Rheumatic Diseases*. 2014;73(9):1607-15.
16. Yazici Y, Curtis JR, Ince A, Baraf H, Malamet RL, Teng LL, et al. Efficacy of tocilizumab in patients with moderate to severe active rheumatoid arthritis and a previous inadequate response to disease-modifying antirheumatic drugs: the ROSE study. *Annals of the Rheumatic Diseases*. 2012;71(2):198-205.
17. Kivitz A, Olech E, Borofsky M, Zazueta BM, Navarro-Sarabia F, Radominski SC, et al. Subcutaneous tocilizumab versus placebo in combination with disease-modifying antirheumatic drugs in patients with rheumatoid arthritis. *Arthritis care & research*. 2014;66(11):1653-61.
18. Roche H-L. TORPEDO Study: A Study on Rapid Effect of Tocilizumab in Patients With Rheumatoid Arthritis With an Inadequate Response to Disease-Modifying Antirheumatic Drugs (DMARDs) or Anti-TNF. Available: <https://clinicaltrials.gov/ct2/show/NCT00977106> [Accessed 10 Nov 2020].
19. Gabay C, Emery P, van Vollenhoven R, Dikranian A, Alten R, Pavelka K, et al. Tocilizumab monotherapy versus adalimumab monotherapy for treatment of rheumatoid arthritis (ADACTA): a randomised, double-blind, controlled phase 4 trial. *Lancet*. 2013;381(9877):1541-50.
20. Burmester GR, Lin Y, Patel R, Van Adelsberg J, Mangan EK, Graham NMH, et al. Efficacy and safety of sarilumab monotherapy versus adalimumab monotherapy for the treatment of patients with active rheumatoid arthritis (MONARCH): A randomised, double-blind, parallel-group phase III trial. *Annals of the Rheumatic Diseases*. 2017;76(5):840-7.
21. Taylor PC, Schiff MH, Wang Q, Jiang Y, Zhuang Y, Kurrasch R, et al. Efficacy and safety of monotherapy with sirukumab compared with adalimumab monotherapy in biologic-naïve patients with active rheumatoid arthritis (SIRROUND-H): A randomised, double-blind, parallel-group, multinational, 52-week, phase 3 study. *Annals of the Rheumatic Diseases*. 2018;77(5):658-66.
22. Weinblatt ME, Mease P, Mysler E, Takeuchi T, Drescher E, Berman A, et al. The efficacy and safety of subcutaneous clazakizumab in patients with moderate-to-severe rheumatoid arthritis and an inadequate response to methotrexate: results from a multinational, phase IIb, randomized, double-blind, placebo/active-controlled, dose-ranging study. *Arthritis & Rheumatology*. 2015;67(10):2591-600.
23. Burmester GR, Rubbert-Roth A, Cantagrel A, Hall S, Leszczynski P, Feldman D, et al. A randomised, double-blind, parallel-group study of the safety and efficacy of subcutaneous tocilizumab versus intravenous tocilizumab in combination with traditional disease-modifying antirheumatic drugs in patients with moderate to severe rheumatoid arthritis (SUMMACTA study). *Annals of the Rheumatic Diseases*. 2014;73(1):69-74.
24. Ogata A, Tanimura K, Sugimoto T, Inoue H, Urata Y, Matsubara T, et al. Phase III study of the efficacy and safety of subcutaneous versus intravenous tocilizumab monotherapy in patients with rheumatoid arthritis. *Arthritis care & research*. 2014;66(3):344-54.
25. Ogata A, Atsumi T, Fukuda T, Hirabayashi Y, Inaba M, Ishiguro N, et al. Sustainable Efficacy of Switching From Intravenous to Subcutaneous Tocilizumab Monotherapy in Patients With Rheumatoid Arthritis. *Arthritis care & research*. 2015;67(10):1354-62.
26. Ogata A, Tanaka Y, Ishii T, Kaneko M, Miwa H, Ohsawa S, et al. A randomized, double-blind, parallel-group, phase III study of shortening the dosing interval of subcutaneous tocilizumab monotherapy in patients with rheumatoid arthritis and an inadequate response to subcutaneous tocilizumab every other week: Results of the 12-week double-blind period. *Modern Rheumatology*. 2018;28(1):76-84.
27. Dougados M, Kissel K, Sheeran T, Tak PP, Conaghan PG, Mola EM, et al. Adding tocilizumab or switching to tocilizumab monotherapy in methotrexate inadequate responders: 24-week symptomatic and structural results of a 2-year randomised controlled strategy trial in rheumatoid arthritis (ACT-RAY). *Annals of the Rheumatic Diseases*. 2013;72(1):43-50.

28. Dougados M, Kissel K, Conaghan PG, Mola EM, Schett G, Gerli R, et al. Clinical, radiographic and immunogenic effects after 1 year of tocilizumab-based treatment strategies in rheumatoid arthritis: the ACT-RAY study. *Annals of the Rheumatic Diseases*. 2014;73(5):803-9.
29. Kaneko Y, Atsumi T, Tanaka Y, Inoo M, Kobayashi-Haraoka H, Amano K, et al. Comparison of adding tocilizumab to methotrexate with switching to tocilizumab in patients with rheumatoid arthritis with inadequate response to methotrexate: 52-week results from a prospective, randomised, controlled study (SURPRISE study). *Annals of the Rheumatic Diseases*. 2016;75(11):1917-23.
30. Emery P, van Hoogstraten H, Thangavelu K, Mangan E, St John G, Verschueren P. Subcutaneous Sarilumab in Patients With Rheumatoid Arthritis who Previously Received Subcutaneous Sarilumab or Intravenous Tocilizumab: An Open-Label Extension of a Randomized Clinical Trial. *ACR Open Rheumatology*. 2020;2(11):672-80.
31. Burmester GR, Rigby WF, van Vollenhoven RF, Kay J, Rubbert-Roth A, Kelman A, et al. Tocilizumab in early progressive rheumatoid arthritis: FUNCTION, a randomised controlled trial. *Annals of the Rheumatic Diseases*. 2016;75(6):1081-91.
32. Burmester GR, Rigby WF, van Vollenhoven RF, Kay J, Rubbert-Roth A, Blanco R, et al. Tocilizumab combination therapy or monotherapy or methotrexate monotherapy in methotrexate-naive patients with early rheumatoid arthritis: 2-year clinical and radiographic results from the randomised, placebo-controlled FUNCTION trial. *Annals of the Rheumatic Diseases*. 2017;76(7):1279-84.
33. Bijlsma JWJ, Welsing PMJ, Woodworth TG, Middelink LM, Petho-Schramm A, Bernasconi C, et al. Early rheumatoid arthritis treated with tocilizumab, methotrexate, or their combination (U-Act-Early): a multicentre, randomised, double-blind, double-dummy, strategy trial. *Lancet*. 2016;388(10042):343-55.
34. Hetland ML, Haavardsholm EA, Rudin A, Nordstrom D, Nurmohamed M, Gudbjornsson B, et al. Active conventional treatment and three different biological treatments in early rheumatoid arthritis: phase IV investigator initiated, randomised, observer blinded clinical trial. *BMJ*. 2020;371:m4328.
35. Edwards CJ, Östör AJK, Naisbett-Groet B, Kiely P. Tapering versus steady-state methotrexate in combination with tocilizumab for rheumatoid arthritis: A randomized, double-blind trial. *Rheumatology (United Kingdom)*. 2018;57(1):84-91.
36. Kremer JM, Rigby W, Singer NG, Birchwood C, Gill D, Reiss W, et al. Sustained Response Following Discontinuation of Methotrexate in Patients With Rheumatoid Arthritis Treated With Subcutaneous Tocilizumab: Results From a Randomized, Controlled Trial. *Arthritis & Rheumatology*. 2018;70(8):1200-8.
37. Pablos JL, Navarro F, Blanco FJ, Román-Ivorra JA, Alonso A, Martín Mola E, et al. Efficacy of tocilizumab monotherapy after response to combined tocilizumab and methotrexate in patients with rheumatoid arthritis: the randomised JUST-ACT study. *Clinical and experimental rheumatology*. 2019;37(3):437-44.
38. Peterfy C, Kremer J, Rigby W, Singer N, Birchwood C, Gill D, et al. Magnetic Resonance Imaging (MRI) Results Following Discontinuation of Methotrexate in Rheumatoid Arthritis Treated with Subcutaneous Tocilizumab: The COMP-ACT MRI Substudy. *Journal of Rheumatology*. 2020;47(3):325-32.
39. Burmester GR, Buttgerit F, Bernasconi C, Alvaro-Gracia JM, Castro N, Dougados M, et al. Continuing versus tapering glucocorticoids after achievement of low disease activity or remission in rheumatoid arthritis (SEMIRA): a double-blind, multicentre, randomised controlled trial. *Lancet*. 2020;396(10246):267-76.
40. Huizinga TWJ, Conaghan PG, Martin-Mola E, Schett G, Amital H, Xavier RM, et al. Clinical and radiographic outcomes at 2 years and the effect of tocilizumab discontinuation following sustained remission in the second and third year of the ACT-RAY study. *Annals of the rheumatic diseases*. 2015;74(1):35-43.

41. Kaneko Y, Kato M, Tanaka Y, Inoo M, Kobayashi-Haraoka H, Amano K, et al. Tocilizumab discontinuation after attaining remission in patients with rheumatoid arthritis who were treated with tocilizumab alone or in combination with methotrexate: results from a prospective randomised controlled study (the second year of the SURPRISE study). *Annals of the Rheumatic Diseases*. 2018;77(9):1268-75.
42. Kedra J, Dieudé P, Marotte H, Lafourcade A, Ducourau E, Schaeffer T, et al. Towards the lowest efficacious dose (toledo): Results of a multicenter non-inferiority randomized open-label controlled Trial Assessing Tocilizumab or Abatacept Injection Spacing in Rheumatoid Arthritis Patients in Remission. American College of Rheumatology Conference: Annual Meeting, ACR, USA, Atlanta. 2019;71:4916-9.
43. De Benedetti F, Brunner HI, Ruperto N, Kenwright A, Wright S, Calvo I, et al. Randomized trial of tocilizumab in systemic juvenile idiopathic arthritis. *New England Journal of Medicine*. 2012;367(25):2385-95.
44. Malattia C, Ruperto N, Pederzoli S, Palmisani E, Pistorio A, Wouters C, et al. Tocilizumab may slow radiographic progression in patients with systemic or polyarticular-course juvenile idiopathic arthritis: post hoc radiographic analysis from two randomized controlled trials. *Arthritis Research & Therapy*. 2020;22(1):211.
45. Brunner HI, Ruperto N, Zuber Z, Keane C, Harari O, Kenwright A, et al. Efficacy and safety of tocilizumab in patients with polyarticular-course juvenile idiopathic arthritis: Results from a phase 3, randomised, double-blind withdrawal trial. *Annals of the Rheumatic Diseases*. 2015;74(6):1110-7.
46. Kaneko Y, Kameda H, Ikeda K, Ishii T, Murakami K, Takamatsu H, et al. Tocilizumab in patients with adult-onset still's disease refractory to glucocorticoid treatment: a randomised, double-blind, placebo-controlled phase III trial. *Annals of the Rheumatic Diseases*. 2018;77(12):1720-9.
47. Stone JH, Tuckwell K, Dimonaco S, Klearman M, Aringer M, Blockmans D, et al. Trial of Tocilizumab in Giant-Cell Arteritis. *New England Journal of Medicine*. 2017;377(4):317-28.
48. Stone J, Spotswood H, Unizony S, Aringer M, Blockmans D, Brouwer E, et al. Time to flare in patients with new-onset versus relapsing giant cell arteritis treated with tocilizumab or placebo plus prednisone Tapering: 3-Year Results from a Randomized Controlled Phase 3 Trial. American College of Rheumatology Conference: Annual Meeting, ACR, USA, Atlanta 2019;71:3278-80.
49. Calderón-Goercke M, Loricera J, Prieto-Pena D, Castañeda S, Caceres VA, Villa I, et al. Tocilizumab in giant cell arteritis: Route of administration: Intravenous or subcutaneous. American College of Rheumatology Conference: Annual Meeting, ACR, USA, Atlanta. 2019;71:4744-6.
50. Schmidt WA, Dasgupta B, Luqmani R, Unizony SH, Blockmans D, Lai Z, et al. A Multicentre, Randomised, Double-Blind, Placebo-Controlled, Parallel-Group Study to Evaluate the Efficacy and Safety of Sirukumab in the Treatment of Giant Cell Arteritis. *Rheumatology & Therapy*. 2020;25:25.
51. Nakaoka Y, Isobe M, Takei S, Tanaka Y, Ishii T, Yokota S, et al. Efficacy and safety of tocilizumab in patients with refractory Takayasu arteritis: results from a randomised, double-blind, placebo-controlled, phase 3 trial in Japan (the TAKT study). *Annals of the Rheumatic Diseases*. 2018;77(3):348-54.
52. van Rhee F, Wong RS, Munshi N, Rossi JF, Ke XY, Fossa A, et al. Siltuximab for multicentric Castleman's disease: a randomised, double-blind, placebo-controlled trial. *Lancet Oncology*. 2014;15(9):966-74.
53. Le RQ, Li L, Yuan W, Shord SS, Nie L, Habtemariam BA, et al. FDA Approval Summary: Tocilizumab for Treatment of Chimeric Antigen Receptor T Cell-Induced Severe or Life-Threatening Cytokine Release Syndrome. *Oncologist*. 2018;23(8):943-7.
54. Zhang C, Zhang M, Qiu W, Ma H, Zhang X, Zhu Z, et al. Safety and efficacy of tocilizumab versus azathioprine in highly relapsing neuromyelitis optica spectrum disorder (TANGO): an open-label, multicentre, randomised, phase 2 trial. *Lancet Neurol*. 2020;19(5):391-401.
55. Yamamura T, Kleiter I, Fujihara K, Palace J, Greenberg B, Zakrzewska-Pniewska B, et al. Trial of Satralizumab in Neuromyelitis Optica Spectrum Disorder. *New England Journal of Medicine*. 2019;381(22):2114-24.

56. Traboulssee A GB, Bennett JL, Szczechowski L, Fox E, Shkrobot S, Yamamura T, Terada Y, Kawata Y, Wright P, Gianella-Borradori A, Garren H, Weinschenker BG. Safety and efficacy of satralizumab monotherapy in neuromyelitis optica spectrum disorder: a randomised, double-blind, multicentre, placebo-controlled phase 3 trial. *Lancet Neurol* 2020;19(5):402-412
57. Emery P, Rondon J, Parrino J, Lin Y, Pena-Rossi C, van Hoogstraten H, et al. Safety and tolerability of subcutaneous sarilumab and intravenous tocilizumab in patients with rheumatoid arthritis. *Rheumatology*. 2019;58(5):849-58.
58. Mease PJ, Gottlieb AB, Berman A, Drescher E, Xing J, Wong R, et al. The Efficacy and Safety of Clazakizumab, an Anti-Interleukin-6 Monoclonal Antibody, in a Phase IIb Study of Adults With Active Psoriatic Arthritis. *Arthritis & Rheumatology*. 2016;68(9):2163-73.
59. Sieper J, Porter-Brown B, Thompson L, Harari O, Dougados M. Assessment of short-term symptomatic efficacy of tocilizumab in ankylosing spondylitis: results of randomised, placebo-controlled trials. *Annals of the Rheumatic Diseases*. 2014;73(1):95-100.
60. Sieper J, Braun J, Kay J, Badalamenti S, Radin AR, Jiao L, et al. Sarilumab for the treatment of ankylosing spondylitis: Results of a Phase II, randomised, double-blind, placebo-controlled study (ALIGN). *Annals of the Rheumatic Diseases*. 2015;74(6):1051-7.
61. Richette P LA, Sellam J, Wendling D, Piperno M, Goupille P, Pers YM, Eymard F, Ottaviani S, Ornetti P, Flipo RM, Fautrel B, Peyr O, Bertola JP, Vicaut E, Chevalier X. . Efficacy of tocilizumab in patients with hand osteoarthritis: double blind, randomised, placebo-controlled, multicentre trial. *Ann Rheum Dis*. 2020 Oct 14:annrheumdis-2020-218547. doi: 10.1136/annrheumdis-2020-218547. Epub ahead of print. PMID: 33055078.
62. Lally L, Forbess L, Hatzis C, Spiera R. Brief Report: A Prospective Open-Label Phase IIa Trial of Tocilizumab in the Treatment of Polymyalgia Rheumatica. *Arthritis and Rheumatology*. 2016;68(10):2550-4.
63. Devauchelle-Pensec V, Berthelot JM, Cornec D, Renaudineau Y, Marhadour T, Jousse-Joulin S, et al. Efficacy of first-line tocilizumab therapy in early polymyalgia rheumatica: A prospective longitudinal study. *Annals of the Rheumatic Diseases*. 2016;75(8):1506-10.
64. Khanna D, Lin CJF, Furst DE, Goldin J, Kim G, Kuwana M, et al. Tocilizumab in systemic sclerosis: a randomised, double-blind, placebo-controlled, phase 3 trial. *The Lancet Respiratory Medicine*. 2020;8(10):963-74.
65. Oddis C. Tocilizumab in the Treatment of Refractory Polymyositis and Dermatomyositis (TIM). Available: <https://clinicaltrials.gov/ct2/show/study/NCT02043548> [Accessed 15 Nov 2020].
66. Wallace DJ, Strand V, Merrill JT, Popa S, Spindler AJ, Eimon A, et al. Efficacy and safety of an interleukin 6 monoclonal antibody for the treatment of systemic lupus erythematosus: a phase II dose-ranging randomised controlled trial. *Annals of the Rheumatic Diseases*. 2017;76(3):534-42.
67. Rovin BH, van Vollenhoven RF, Aranow C, Wagner C, Gordon R, Zhuang Y, et al. A Multicenter, Randomized, Double-Blind, Placebo-Controlled Study to Evaluate the Efficacy and Safety of Treatment With Sirukumab (CNTO 136) in Patients With Active Lupus Nephritis. *Arthritis & Rheumatology*. 2016;68(9):2174-83.
68. Ablynx. A Phase II Study to Evaluate Safety and Efficacy of ALX-0061 in Subjects With Systemic Lupus Erythematosus Available: <https://clinicaltrials.gov/ct2/show/NCT02437890> [Accessed 09 Nov 2021].
69. Felten R, Devauchelle-Pensec V, Seror R, Duffau P, Saadoun D, Hachulla E, et al. Interleukin 6 receptor inhibition in primary Sjögren syndrome: a multicentre double-blind randomised placebo-controlled trial. *Annals of the Rheumatic Diseases*. 2020 Nov 18;annrheumdis-2020-218467. doi: 10.1136/annrheumdis-2020-218467. Online ahead of print.
70. Okuda Y, Ohnishi M, Matoba K, Jouyama K, Yamada A, Sawada N, et al. Comparison of the clinical utility of tocilizumab and anti-TNF therapy in AA amyloidosis complicating rheumatic diseases. *Modern Rheumatology*. 2014;24(1):137-43.
71. Okuda Y, Yamada T, Ueda M, Ando Y. First nationwide survey of 199 patients with amyloid a amyloidosis in Japan. *Internal Medicine*. 2018;57(23):3351-5.

72. San-Miguel J, Bladé J, Shpilberg O, Grosicki S, Maloisel F, Min C-K, et al. Phase 2 randomized study of bortezomib-melphalan-prednisone with or without siltuximab (anti-IL-6) in multiple myeloma. *Blood*. 2014;123(26):4136-42.
73. Brighton TA, Khot A, Harrison SJ, Ghez D, Weiss BM, Kirsch A, et al. Randomized, Double-Blind, Placebo-Controlled, Multicenter Study of Siltuximab in High-Risk Smoldering Multiple Myeloma. *Clin Cancer Res*. 2019;25(13):3772-5.
74. Rodriguez-Bano J, Pachon J, Carratala J, Ryan P, Jarrin I, Yllescas M, et al. Treatment with tocilizumab or corticosteroids for COVID-19 patients with hyperinflammatory state: a multicentre cohort study (SAM-COVID-19). *Clin Microbiol Infect*. 2020;27:27.
75. Ip A, Berry DA, Hansen E, Goy AH, Pecora AL, Sinclair BA, et al. Hydroxychloroquine and tocilizumab therapy in COVID-19 patients-An observational study. *PLoS ONE*. 2020;15(8 August).
76. Guaraldi G, Meschiari M, Cozzi-Lepri A, Milic J, Tonelli R, Menozzi M, et al. Tocilizumab in patients with severe COVID-19: a retrospective cohort study. *The Lancet Rheumatology*. 2020;2(8):e474-e84.
77. Biran N, Ip A, Ahn J, Go RC, Wang S, Mathura S, et al. Tocilizumab among patients with COVID-19 in the intensive care unit: a multicentre observational study. *The Lancet Rheumatology*. 2020;2(10):e603-e12.
78. Gupta S, Wang W, Hayek SS, Chan L, Mathews KS, Melamed ML, et al. Association Between Early Treatment With Tocilizumab and Mortality Among Critically Ill Patients With COVID-19. *JAMA Internal Medicine*. 2020;20:20.
79. Della-Torre E, Campochiaro C, Cavalli G, De Luca G, Napolitano A, La Marca S, et al. Interleukin-6 blockade with sarilumab in severe COVID-19 pneumonia with systemic hyperinflammation: An open-label cohort study. *Annals of the Rheumatic Diseases*. 2020;79(10):1277-85.
80. Ramiro S, Mostard RLM, Magro-Checa C, van Dongen CMP, Dormans T, Buijs J, et al. Historically controlled comparison of glucocorticoids with or without tocilizumab versus supportive care only in patients with COVID-19-associated cytokine storm syndrome: results of the CHIC study. *Annals of the Rheumatic Diseases*. 2020;79(9):1143-51.
81. Hermine O, Mariette X, Tharaux PL, Resche-Rigon M, Porcher R, Ravaud P, et al. Effect of Tocilizumab vs Usual Care in Adults Hospitalized With COVID-19 and Moderate or Severe Pneumonia: A Randomized Clinical Trial. *JAMA Internal Medicine*. 2020;20:20.
82. Salvarani C, Dolci G, Massari M, Merlo DF, Cavuto S, Savoldi L, et al. Effect of Tocilizumab vs Standard Care on Clinical Worsening in Patients Hospitalized with COVID-19 Pneumonia: A Randomized Clinical Trial. *JAMA Internal Medicine*. 2020;Article in Press.
83. Stone JH, Frigault MJ, Serling-Boyd NJ, Fernandes AD, Harvey L, Foulkes AS, et al. Efficacy of Tocilizumab in Patients Hospitalized with Covid-19. *New England journal of medicine*. 2020;Article in Press.
84. Salama C, Han J, Yau L, Reiss WG, Kramer B, Neidhart JD, et al. Tocilizumab in Patients Hospitalized with Covid-19 Pneumonia. *New England Journal of Medicine*. 2020;384(1):20-30.
85. Doberer K, Duerr M, Halloran PF, Eskandary F, Budde K, Regele H, et al. A Randomized Clinical Trial of Anti-IL-6 Antibody Clazakizumab in Late Antibody-Mediated Kidney Transplant Rejection. *Journal of the American Society of Nephrology*. published online ahead of print Dec 18, 2020.
86. Kim SC, Solomon DH, Rogers JR, Gale S, Klearman M, Sarsour K, et al. Cardiovascular Safety of Tocilizumab Versus Tumor Necrosis Factor Inhibitors in Patients With Rheumatoid Arthritis: A Multi-Database Cohort Study. *Arthritis and Rheumatology*. 2017;69(6):1154-64.
87. Kim SC, Solomon DH, Rogers JR, Gale S, Klearman M, Sarsour K, et al. No difference in cardiovascular risk of tocilizumab versus abatacept for rheumatoid arthritis: A multi-database cohort study. *Seminars in Arthritis and Rheumatism*. 2018;48(3):399-405.
88. Xie F, Yun H, Levitan EB, Muntner P, Curtis JR. Tocilizumab and the Risk of Cardiovascular Disease: Direct Comparison Among Biologic Disease-Modifying Antirheumatic Drugs for Rheumatoid Arthritis Patients. *Arthritis Care and Research*. 2019;71(8):1004-18.

89. Giles JT, Sattar N, Gabriel S, Ridker PM, Gay S, Warne C, et al. Cardiovascular Safety of Tocilizumab Versus Etanercept in Rheumatoid Arthritis: A Randomized Controlled Trial. *Arthritis & Rheumatology*. 2020;72(1):31-40.
90. Zhang J, Xie F, Yun H, Chen L, Muntner P, Levitan EB, et al. Comparative effects of biologics on cardiovascular risk among older patients with rheumatoid arthritis. *Annals of the Rheumatic Diseases*. 2016;75(10):1813-8.
91. Generali E, Carrara G, Selmi C, Verstappen S, Zambon A, Bortoluzzi A, et al. Comparison of the risks of hospitalisation for cardiovascular events in patients with rheumatoid arthritis treated with tocilizumab and etanercept. *Clinical and Experimental Rheumatology*. 2018;36(2):310-3.
92. Lukas C, Redondin M, Pane I, Soubrier M, Houvenagel E, Sibilia J, et al. Cardiovascular events and change in cholesterol levels in patients with rheumatoid arthritis treated with tocilizumab: data from the REGATE Registry. *Clinical and experimental rheumatology*. 2020.
93. Crnkic Kapetanovic M, Saxne T, Jonsson G, Truedsson L, Geborek P. Rituximab and abatacept but not tocilizumab impair antibody response to pneumococcal conjugate vaccine in patients with rheumatoid arthritis. *Arthritis Research & Therapy*. 2013;15(5):R171.
94. Mori S, Ueki Y, Akeda Y, Hirakata N, Oribe M, Shiohira Y, et al. Pneumococcal polysaccharide vaccination in rheumatoid arthritis patients receiving tocilizumab therapy. *Annals of the Rheumatic Diseases*. 2013;72(8):1362-6.
95. Tsuru T, Terao K, Murakami M, Matsutani T, Suzuki M, Amamoto T, et al. Immune response to influenza vaccine and pneumococcal polysaccharide vaccine under IL-6 signal inhibition therapy with tocilizumab. *Modern Rheumatology*. 2014;24(3):511-6.
96. Bingham CO, 3rd, Rizzo W, Kivitz A, Hassanali A, Upmanyu R, Klearman M. Humoral immune response to vaccines in patients with rheumatoid arthritis treated with tocilizumab: results of a randomised controlled trial (VISARA). *Annals of the Rheumatic Diseases*. 2015;74(5):818-22.
97. Shinoki T, Hara R, Kaneko U, Miyamae T, Imagawa T, Mori M, et al. Safety and response to influenza vaccine in patients with systemic-onset juvenile idiopathic arthritis receiving tocilizumab. *Modern Rheumatology*. 2012;22(6):871-6.
98. Carrara G, Bortoluzzi A, Sakellariou G, Silvagni E, Zanetti A, Govoni M, et al. Risk of hospitalisation for serious bacterial infections in patients with rheumatoid arthritis treated with biologics. Analysis from the RECORD linkage on rheumatic disease study of the Italian Society for Rheumatology. *Clinical and Experimental Rheumatology*. 2019;37(1):60-6.
99. Mori S, Yoshitama T, Hidaka T, Sakai F, Hasegawa M, Hashiba Y, et al. Comparative risk of hospitalized infection between biological agents in rheumatoid arthritis patients: A multicenter retrospective cohort study in Japan. *PLoS ONE*. 2017;12(6).
100. Rutherford AI, Subesinghe S, Hyrich KL, Galloway JB. Serious infection across biologic-treated patients with rheumatoid arthritis: Results from the British Society for Rheumatology Biologics Register for Rheumatoid Arthritis. *Annals of the Rheumatic Diseases*. 2018;77(6):905-10.
101. Pawar A, Desai RJ, Solomon DH, Santiago Ortiz AJ, Gale S, Bao M, et al. Risk of serious infections in tocilizumab versus other biologic drugs in patients with rheumatoid arthritis: A multidatabase cohort study. *Annals of the Rheumatic Diseases*. 2019;78(4):456-64.
102. Grøn KL, Arkema EV, Glinthorg B, Mehnert F, Østergaard M, Dreyer L, et al. Risk of serious infections in patients with rheumatoid arthritis treated in routine care with abatacept, rituximab and tocilizumab in Denmark and Sweden. *Annals of the Rheumatic Diseases*. 2019;78(3):320-7.
103. Grøn KL, Glinthorg B, Nørgaard M, Mehnert F, Østergaard M, Dreyer L, et al. Overall infection risk in rheumatoid arthritis during treatment with abatacept, rituximab and tocilizumab; an observational cohort study. *Rheumatology (Oxford, England)*. 2020;59(8):1949-56.
104. Morel J, Constantin A, Baron G, Dernis E, Flipo RM, Rist S, et al. Risk factors of serious infections in patients with rheumatoid arthritis treated with tocilizumab in the French Registry REGATE. *Rheumatology (United Kingdom)*. 2017;56(10):1746-54.
105. Sakai R, Cho SK, Nanki T, Watanabe K, Yamazaki H, Tanaka M, et al. Head-to-head comparison of the safety of tocilizumab and tumor necrosis factor inhibitors in rheumatoid arthritis



- patients (RA) in clinical practice: results from the registry of Japanese RA patients on biologics for long-term safety (REAL) registry. *Arthritis Research & Therapy*. 2015;17:74.
106. Yun H, Xie F, Delzell E, Levitan EB, Chen L, Lewis JD, et al. Comparative Risk of Hospitalized Infection Associated with Biologic Agents in Rheumatoid Arthritis Patients Enrolled in Medicare. *Arthritis and Rheumatology*. 2016;68(1):56-66.
107. Rutherford AI, Patarata E, Subesinghe S, Hyrich KL, Galloway JB. Opportunistic infections in rheumatoid arthritis patients exposed to biologic therapy: Results from the British Society for Rheumatology Biologics Register for Rheumatoid Arthritis. *Rheumatology (United Kingdom)*. 2018;57(6):997-1001.
108. Leon L, Penuelas M, Candel FJ, Freites D, Rodriguez-Rodriguez L, Fernandez-Gutierrez B, et al. Indicator opportunistic infections after biological treatment in rheumatoid arthritis, 10 years follow-up in a real-world setting. *Therapeutic Advances in Musculoskeletal Disease*. 2019;11:1759720X19878004.
109. Lim CH, Chen HH, Chen YH, Chen DY, Huang WN, Tsai JJ, et al. The risk of tuberculosis disease in rheumatoid arthritis patients on biologics and targeted therapy: A 15-year real world experience in Taiwan. *PLoS ONE*. 2017;12(6).
110. Wang X, Wong SH, Wang XS, Tang W, Liu CQ, Niamul G, et al. Risk of tuberculosis in patients with immune-mediated diseases on biological therapies: A population-based study in a tuberculosis endemic region. *Rheumatology (United Kingdom)*. 2019;58(5):803-10.
111. Curtis JR, Xie F, Yun H, Bernatsky S, Winthrop KL. Real-world comparative risks of herpes virus infections in tofacitinib and biologic-treated patients with rheumatoid arthritis. *Annals of the Rheumatic Diseases*. 2016;75(10):1843-7.
112. Yun H, Xie F, Delzell E, Chen L, Levitan EB, Lewis JD, et al. Risks of herpes zoster in patients with rheumatoid arthritis according to biologic disease-modifying therapy. *Arthritis Care and Research*. 2015;67(5):731-6.
113. Wadström H, Frisell T, Askling J. Malignant neoplasms in patients with rheumatoid arthritis treated with tumor necrosis factor inhibitors, tocilizumab, abatacept, or rituximab in clinical practice: A nationwide cohort study from Sweden. *JAMA Internal Medicine*. 2017;177(11):1605-12.
114. Kim SC, Pawar A, Desai RJ, Solomon DH, Gale S, Bao M, et al. Risk of malignancy associated with use of tocilizumab versus other biologics in patients with rheumatoid arthritis: A multi-database cohort study. *Seminars in Arthritis and Rheumatism*. 2019;49(2):222-8.
115. Hellgren K, Di Giuseppe D, Smedby KE, Sundström C, Askling J, Baecklund E. Lymphoma risks in patients with rheumatoid arthritis treated with biological drugs—a Swedish cohort study of risks by time, drug and lymphoma subtype. *Rheumatology (Oxford, England)*. 2020.
116. Mercer LK, Askling J, Raaschou P, Dixon WG, Dreyer L, Hetland ML, et al. Risk of invasive melanoma in patients with rheumatoid arthritis treated with biologics: Results from a collaborative project of 11 European biologic registers. *Annals of the Rheumatic Diseases*. 2017;76(2):386-91.
117. Rempenault C, Lukas C, Combe B, Schaeverbeke T, Wendling D, Pham T, et al. RISK OF DIVERTICULITIS AND GASTRO-INTESTINAL PERFORATION IN RHEUMATOID ARTHRITIS TREATED WITH TOCILIZUMAB COMPARED TO RITUXIMAB AND ABATACEPT: A PROSPECTIVE PROPENSITY-MATCHED COHORT STUDY. *Annals of the Rheumatic Diseases Conference: annual european congress of rheumatology of the european league against rheumatism, EULAR 2020, Germany*. 2020;79(Suppl 1):17-.
118. Monemi S, Berber E, Sarsour K, Wang J, Lampl K, Bharucha K, et al. Incidence of Gastrointestinal Perforations in Patients with Rheumatoid Arthritis Treated with Tocilizumab from Clinical Trial, Postmarketing, and Real-World Data Sources. *Rheumatology & Therapy*. 2016;3(2):337-52.
119. Strangfeld A, Richter A, Siegmund B, Herzer P, Rockwitz K, Demary W, et al. Risk for lower intestinal perforations in patients with rheumatoid arthritis treated with tocilizumab in comparison to treatment with other biologic or conventional synthetic DMARDs. *Annals of the Rheumatic Diseases*. 2017;76(3):504-10.

120. Barbulescu A, Delcoigne B, Askling J, Frisell T. Gastrointestinal perforations in patients with rheumatoid arthritis treated with biological disease-modifying antirheumatic drugs in Sweden: A nationwide cohort study. *RMD Open*. 2020;6(2).
121. Xie F, Yun H, Bernatsky S, Curtis JR. Brief Report: Risk of Gastrointestinal Perforation Among Rheumatoid Arthritis Patients Receiving Tofacitinib, Tocilizumab, or Other Biologic Treatments. *Arthritis and Rheumatology*. 2016;68(11):2612-7.
122. Koike T, Harigai M, Inokuma S, Ishiguro N, Ryu J, Takeuchi T, et al. Effectiveness and safety of tocilizumab: postmarketing surveillance of 7901 patients with rheumatoid arthritis in Japan. *Journal of Rheumatology*. 2014;41(1):15-23.
123. Genovese MC, Kremer JM, van Vollenhoven RF, Alten R, Scali JJ, Kelman A, et al. Transaminase Levels and Hepatic Events During Tocilizumab Treatment: Pooled Analysis of Long-Term Clinical Trial Safety Data in Rheumatoid Arthritis. *Arthritis & Rheumatology*. 2017;69(9):1751-61.
124. Brodzsky V, Biro A, Szekanecz Z, Soos B, Baji P, Rencz F, et al. Determinants of biological drug survival in rheumatoid arthritis: evidence from a Hungarian rheumatology center over 8 years of retrospective data. *Clinicoeconomics & Outcomes Research*. 2017;9:139-47.
125. Ebina K, Hashimoto M, Yamamoto W, Ohnishi A, Kabata D, Hirano T, et al. Drug retention and discontinuation reasons between seven biologics in patients with rheumatoid arthritis -The ANSWER cohort study. *PLoS ONE*. 2018;13(3).
126. Ebina K, Hirano T, Maeda Y, Yamamoto W, Hashimoto M, Murata K, et al. Drug retention of 7 biologics and tofacitinib in biologics-naive and biologics-switched patients with rheumatoid arthritis: the ANSWER cohort study. *Arthritis Research & Therapy*. 2020;22(1):142.
127. Ebina K, Hashimoto M, Yamamoto W, Hirano T, Hara R, Katayama M, et al. Drug tolerability and reasons for discontinuation of seven biologics in elderly patients with rheumatoid arthritis -The ANSWER cohort study. *PLoS ONE*. 2019;14(5).
128. Gottenberg JE, Morel J, Perrodeau E, Bardin T, Combe B, Dougados M, et al. Comparative effectiveness of rituximab, abatacept, and tocilizumab in adults with rheumatoid arthritis and inadequate response to TNF inhibitors: prospective cohort study. *BMJ*. 2019;364:l67.
129. Yun H, Xie F, Beyl RN, Chen L, Lewis JD, Saag KG, et al. Risk of Hypersensitivity to Biologic Agents Among Medicare Patients With Rheumatoid Arthritis. *Arthritis care & research*. 2017;69(10):1526-34.
130. Salmon JH, Perotin JM, Morel J, Dramé M, Cantagrel A, Ziegler LE, et al. Serious infusion-related reaction after rituximab, abatacept and tocilizumab in rheumatoid arthritis: prospective registry data. *Rheumatology (Oxford, England)*. 2018;57(1):134-9.
131. McInnes IB, Thompson L, Giles JT, Bathon JM, Salmon JE, Beaulieu AD, et al. Effect of interleukin-6 receptor blockade on surrogates of vascular risk in rheumatoid arthritis: MEASURE, a randomised, placebo-controlled study. *Annals of the Rheumatic Diseases*. 2015;74(4):694-702.
132. Gabay C, McInnes IB, Kavanaugh A, Tuckwell K, Klearman M, Pulley J, et al. Comparison of lipid and lipid-associated cardiovascular risk marker changes after treatment with tocilizumab or adalimumab in patients with rheumatoid arthritis. *Annals of the Rheumatic Diseases*. 2016;75(10):1806-12.
133. Chen SK, Lee H, Jin Y, Liu J, Kim SC. Use of biologic or targeted-synthetic disease-modifying anti-rheumatic drugs and risk of diabetes treatment intensification in patients with rheumatoid arthritis and diabetes mellitus. *Rheumatol Adv Pract*. 2020;4(2):rkaa027.
134. Genovese MC, Burmester GR, Hagino O, Thangavelu K, Iglesias-Rodriguez M, John GS, et al. Interleukin-6 receptor blockade or TNF $\alpha$  inhibition for reducing glycaemia in patients with RA and diabetes: Post hoc analyses of three randomised, controlled trials. *Arthritis Research and Therapy*. 2020;22(1).
135. Paul SK, Montvida O, Best JH, Gale S, Pethoe-Schramm A, Sarsour K. Effectiveness of biologic and non-biologic antirheumatic drugs on anaemia markers in 153,788 patients with rheumatoid arthritis: New evidence from real-world data. *Seminars in Arthritis and Rheumatism*. 2018;47(4):478-84.

136. Moots RJ, Sebba A, Rigby W, Ostor A, Porter-Brown B, Donaldson F, et al. Effect of tocilizumab on neutrophils in adult patients with rheumatoid arthritis: pooled analysis of data from phase 3 and 4 clinical trials. *Rheumatology*. 2017;56(4):541-9.
137. Mori S, Yoshitama T, Hidaka T, Hirakata N, Ueki Y. Effectiveness and safety of tocilizumab therapy for patients with rheumatoid arthritis and renal insufficiency: a real-life registry study in Japan (the ACTRA-RI study). *Annals of the rheumatic diseases*. 2015;74(3):627-30.
138. Curtis JR, Sarsour K, Napalkov P, Costa LA, Schulman KL. Incidence and complications of interstitial lung disease in users of tocilizumab, rituximab, abatacept and anti-tumor necrosis factor  $\alpha$  agents, a retrospective cohort study. *Arthritis Research and Therapy*. 2015;17(1).
139. Strangfeld A, Meißner Y, Schaefer M, Baganz L, Schneider M, Wilden E, et al. No confirmation of increased risk of idiopathic facial nerve palsy under tocilizumab. *Annals of the Rheumatic Diseases Conference: annual european congress of rheumatology of the european league against rheumatism, EULAR 2019, Spain 2019*;78:351-2.
140. Shin A, Dong YH, Shin S, Ha YJ, Lee YJ, Lee EB, et al. The comparative risk of osteoporotic fractures among patients with rheumatoid arthritis receiving TNF inhibitors versus other biologics: A nation-wide cohort study in Korea. 2019;78(Annals of the Rheumatic Diseases Conference: annual european congress of rheumatology of the european league against rheumatism, EULAR 2019, Spain 2019):726.
141. Kume K, Amano K, Yamada S, Kanazawa T, Ohta H, Hatta K, et al. The effect of tocilizumab on bone mineral density in patients with methotrexate-resistant active rheumatoid arthritis. *Rheumatology*. 2014;53(5):900-3.
142. Chen YM, Chen HH, Huang WN, Liao TL, Chen JP, Chao WC, et al. Tocilizumab potentially prevents bone loss in patients with anticitrullinated protein antibody-positive rheumatoid arthritis. *PLoS ONE*. 2017;12(11).
143. Hoeltzenbein M, Beck E, Rajwanshi R, Gøtestam Skorpen C, Berber E, Schaefer C, et al. Tocilizumab use in pregnancy: Analysis of a global safety database including data from clinical trials and post-marketing data. *Seminars in Arthritis and Rheumatism*. 2016;46(2):238-45.
144. Weber-Schoendorfer C, Schaefer C. Pregnancy outcome after tocilizumab therapy in early pregnancy—a case series from the German Embryotox Pharmacovigilance Center. *Reproductive Toxicology*. 2016;60:29-32.
145. Kameda H, Wada K, Takahashi Y, Hagino O, van Hoogstraten H, Graham N, et al. Sarilumab monotherapy or in combination with non-methotrexate disease-modifying antirheumatic drugs in active rheumatoid arthritis: A Japan phase 3 trial (HARUKA). *Modern Rheumatology*. 2020;30(2):239-48.
146. Fleischmann R, Genovese MC, Lin Y, John GS, van der Heijde D, Wang S, et al. Long-term safety of sarilumab in rheumatoid arthritis: An integrated analysis with up to 7 years' follow-up. *Rheumatology (United Kingdom)*. 2020;59(2):292-302.
147. Takeuchi T, Yamanaka H, Harigai M, Tamamura R, Kato Y, Ukyo Y, et al. Sirukumab in rheumatoid arthritis refractory to sulfasalazine or methotrexate: a randomized phase 3 safety and efficacy study in Japanese patients. *Arthritis Research & Therapy*. 2018;20(1):42.
148. Thorne C, Takeuchi T, Karpouzas GA, Sheng S, Kurrasch R, Fei K, et al. Investigating sirukumab for rheumatoid arthritis: 2-year results from the phase III SIRROUND-D study. *RMD Open*. 2018;4(2):e000731.
149. Horneff G, Klein A, Klotsche J, Minden K, Huppertz HI, Weller-Heinemann F, et al. Comparison of treatment response, remission rate and drug adherence in polyarticular juvenile idiopathic arthritis patients treated with etanercept, adalimumab or tocilizumab. *Arthritis Research and Therapy*. 2016;18(1).
150. Grönlund MM, Remes-Pakarinen T, Kröger L, Markula-Patjas K, Backström M, Putto-Laurila A, et al. Efficacy and safety of tocilizumab in a real-life observational cohort of patients with polyarticular juvenile idiopathic arthritis. *Rheumatology (United Kingdom)*. 2020;59(4):732-41.

151. Klein A, Klotsche J, Hügler B, Minden K, Hospach A, Weller-Heinemann F, et al. Long-term surveillance of biologic therapies in systemic-onset juvenile idiopathic arthritis: data from the German BIKER registry. *Rheumatology (Oxford, England)*. 2020;59(9):2287-98.
152. Shafran IH, Alasti F, Smolen JS, Aletaha D. Implication of baseline levels and early changes of C-reactive protein for subsequent clinical outcomes of patients with rheumatoid arthritis treated with tocilizumab. *Annals of the Rheumatic Diseases*. 2020;79(7):874-82.
153. Shimamoto K, Ito T, Ozaki Y, Amuro H, Tanaka A, Nishizawa T, et al. Serum interleukin 6 before and after therapy with tocilizumab is a principal biomarker in patients with rheumatoid arthritis. *Journal of Rheumatology*. 2013;40(7):1074-81.
154. Nishimoto N, Amano K, Hirabayashi Y, Horiuchi T, Ishii T, Iwahashi M, et al. Drug free REmission/low disease activity after cessation of tocilizumab (Actemra) Monotherapy (DREAM) study. *Modern Rheumatology*. 2014;24(1):17-25.
155. Strand V, Boklage SH, Kimura T, Joly F, Boyapati A, Msihid J. High levels of interleukin-6 in patients with rheumatoid arthritis are associated with greater improvements in health-related quality of life for sarilumab compared with adalimumab. *Arthritis Research & Therapy*. 2020;22(1):250.
156. Boyapati A, Schwartzman S, Msihid J, Choy E, Genovese MC, Burmester GR, et al. Association of High Serum Interleukin-6 Levels With Severe Progression of Rheumatoid Arthritis and Increased Treatment Response Differentiating Sarilumab From Adalimumab or Methotrexate in a Post Hoc Analysis. *Arthritis & Rheumatology*. 2020;28:28.
157. Cappelli LC, Palmer JL, Kremer J, Bingham CO, 3rd. Tocilizumab treatment leads to improvement in disease activity regardless of CCP status in rheumatoid arthritis. *Seminars in Arthritis & Rheumatism*. 2017;47(2):165-9.
158. Sanayama Y, Ikeda K, Saito Y, Kagami S, Yamagata M, Furuta S, et al. Prediction of therapeutic responses to tocilizumab in patients with rheumatoid arthritis: biomarkers identified by analysis of gene expression in peripheral blood mononuclear cells using genome-wide DNA microarray. *Arthritis & Rheumatology*. 2014;66(6):1421-31.
159. Maldonado-Montoro M, Canadas-Garre M, Gonzalez-Utrilla A, Plaza-Plaza JC, Calleja-Hernandez MY. Genetic and clinical biomarkers of tocilizumab response in patients with rheumatoid arthritis. *Pharmacological Research*. 2016;111:264-71.
160. Jiménez Morales A, Maldonado-Montoro M, Martínez de la Plata JE, Pérez Ramírez C, Daddaoua A, Alarcón Payer C, et al. FCGR2A/FCGR3A Gene Polymorphisms and Clinical Variables as Predictors of Response to Tocilizumab and Rituximab in Patients With Rheumatoid Arthritis. *Journal of Clinical Pharmacology*. 2019;59(4):517-31.
161. Daien CI, Gailhac S, Audo R, Mura T, Hahne M, Combe B, et al. High levels of natural killer cells are associated with response to tocilizumab in patients with severe rheumatoid arthritis. *Rheumatology*. 2015;54(4):601-8.
162. Humby F, Buch MH, Durez P, Lewis M, Bombardieri M, Rizvi H, et al. A randomised, open labelled clinical trial to investigate synovial mechanisms determining response-resistance to rituximab versus tocilizumab in rheumatoid arthritis patients failing TNF inhibitor therapy. *American College of Rheumatology Conference: Annual Meeting, ACR, USA, Atlanta*. 2019;71:5180-3.
163. Dulic S, Vászárhelyi Z, Sava F, Berta L, Szalay B, Toldi G, et al. T-Cell Subsets in Rheumatoid Arthritis Patients on Long-Term Anti-TNF or IL-6 Receptor Blocker Therapy. *Mediators of Inflammation*. 2017;2017.
164. Gabay C, Msihid J, Zilberstein M, Paccard C, Lin Y, Graham NMH, et al. Identification of sarilumab pharmacodynamic and predictive markers in patients with inadequate response to TNF inhibition: a biomarker substudy of the phase 3 TARGET study. *RMD Open*. 2018;4(1):e000607.
165. Gabay C, Burmester GR, Strand V, Msihid J, Zilberstein M, Kimura T, et al. Sarilumab and adalimumab differential effects on bone remodelling and cardiovascular risk biomarkers, and predictions of treatment outcomes. *Arthritis Research & Therapy*. 2020;22(1):70.

166. Toussiot E, Marotte H, Mulleman D, Cormier G, Coury F, Gaudin P, et al. Increased high molecular weight adiponectin and lean mass during tocilizumab treatment in patients with rheumatoid arthritis: a 12-month multicentre study. *Arthritis Research & Therapy*. 2020;22(1):224.
167. Fioravanti A, Tenti S, Bacarelli MR, Damiani A, Li Gobbi F, Bandinelli F, et al. Tocilizumab modulates serum levels of adiponectin and chemerin in patients with rheumatoid arthritis: potential cardiovascular protective role of IL-6 inhibition. *Clinical & Experimental Rheumatology*. 2019;37(2):293-300.
168. Gerasimova H, Popkova T, Kirillova I, Cherkasova M, Martynova A, Novikova D, et al. Significant improvement of NT-probnp levels in rheumatoid arthritis patients treated with tocilizumab and tofacitinib. *Annals of the Rheumatic Diseases Conference: annual european congress of rheumatology of the european league against rheumatism, EULAR 2020, Germany*. 2020;79(SUPPL 1):625-6.
169. Gardette A, Ottaviani S, Sellam J, Berenbaum F, Lioté F, Meyer A, et al. Body mass index and response to tocilizumab in rheumatoid arthritis: A real life study. *Clinical Rheumatology*. 2016;35(4):857-61.
170. Schäfer M, Meißner Y, Kekow J, Berger S, Remstedt S, Manger B, et al. Obesity reduces the real-world effectiveness of cytokine-targeted but not cell-targeted disease-modifying agents in rheumatoid arthritis. *Rheumatology (Oxford, England)*. 2020;59(8):1916-26.
171. Davies R, Vivekanantham A, Lunt M, Watson K, Hyrich K, Bluett J. The effect of bodyweight on response to intravenous or subcutaneous tocilizumab in patients with rheumatoid arthritis. *Annals of the Rheumatic Diseases Conference: annual european congress of rheumatology of the european league against rheumatism, EULAR 2020, Germany*. 2020;79(SUPPL 1):985.
172. Forsblad-d'Elia H, Bengtsson K, Kristensen LE, Jacobsson LTH. Drug adherence, response and predictors thereof for tocilizumab in patients with rheumatoid arthritis: Results from the Swedish biologics register. *Rheumatology (United Kingdom)*. 2015;54(7):1186-93.
173. Pappas DA, Blachley T, Best JH, Zlotnick S, Emeanuru K, Kremer JM. Persistence of tocilizumab therapy among patients with rheumatoid arthritis: Data from the us-based corona rheumatoid arthritis registry. *Annals of the Rheumatic Diseases Conference: annual european congress of rheumatology of the european league against rheumatism, EULAR 2020, Germany*. 2020;79(SUPPL 1):631-2.
174. Best JH, Vlad SC, Tominna L, Abbasi I. Real-World Persistence with Tocilizumab Compared to Other Subcutaneous Biologic Disease-Modifying Antirheumatic Drugs Among Patients with Rheumatoid Arthritis Switching from Another Biologic. *Rheumatology and Therapy*. 2020;7(2):345-55.
175. Sarau A, Barnette T, Baudens G, Idier I, Delaporte F, Hilliquin P. Subcutaneous tocilizumab in monotherapy or in combination with csDMARD in patients with moderate to severe rheumatoid arthritis: Observational study to describe real-world drug retention rate at 12 months. *Annals of the Rheumatic Diseases Conference: annual european congress of rheumatology of the european league against rheumatism, EULAR 2019, Spain*. 2019;78:725-6.
176. Haraoui B, Casado G, Czirják L, Taylor A, Dong L, Button P, et al. Tocilizumab Patterns of Use, Effectiveness, and Safety in Patients with Rheumatoid Arthritis: Final Results from a Set of Multi-National Non-Interventional Studies. *Rheumatology and Therapy*. 2019;6(2):231-43.
177. Tanaka Y, Kameda H, Saito K, Kaneko Y, Tanaka E, Yasuda S, et al. Effect of subcutaneous tocilizumab treatment on work/housework status in biologic-naïve rheumatoid arthritis patients using inverse probability of treatment weighting: FIRST ACT-SC study. *Arthritis Research and Therapy*. 2018;20(1).
178. Strand V, Michalska M, Birchwood C, Pei J, Tuckwell K, Finch R, et al. Impact of tocilizumab monotherapy on patient-reported outcomes in patients with rheumatoid arthritis from two randomised controlled trials. *RMD Open*. 2017;3(2):e000496.
179. Strand V, Gossec L, Proudfoot CWJ, Chen CI, Reaney M, Guillonneau S, et al. Patient-reported outcomes from a randomized phase III trial of sarilumab monotherapy versus adalimumab monotherapy in patients with rheumatoid arthritis. *Arthritis Research & Therapy*. 2018;20(1):129.

180. Strand V, Michalska M, Birchwood C, Pei J, Tuckwell K, Finch R, et al. Impact of tocilizumab administered intravenously or subcutaneously on patient-reported quality-of-life outcomes in patients with rheumatoid arthritis. *RMD Open*. 2018;4(1):e000602.
181. Strand V, Dimonaco S, Tuckwell K, Klearman M, Collinson N, Stone JH. Health-related quality of life in patients with giant cell arteritis treated with tocilizumab in a phase 3 randomised controlled trial. *Arthritis Research & Therapy*. 2019;21(1):64.
182. Ayaz NA, Karadağ ŞG, Koç R, Demirkan FG, Çakmak F, Sönmez HE. Patient satisfaction and clinical effectiveness of switching from intravenous tocilizumab to subcutaneous tocilizumab in patients with juvenile idiopathic arthritis: an observational study. *Rheumatology International*. 2020;40(7):1111-6.
183. Soini EJ, Hallinen TA, Puolakka K, Vihervaara V, Kauppi MJ. Cost-effectiveness of adalimumab, etanercept, and tocilizumab as first-line treatments for moderate-to-severe rheumatoid arthritis. *Journal of Medical Economics*. 2012;15(2):340-51.
184. Johnston SS, McMorrow D, Farr AM, Juneau P, Ogale S. Comparison of Healthcare Costs Between Rheumatoid Arthritis Patients Treated with Infused Biologics After Switching from Another Biologic. *Drugs - Real World Outcomes*. 2015;2(1):99-109.
185. Verhoeven MMA, Tekstra J, van Laar JM, Pethö-Schramm A, Borm MEA, Bijlsma JWJ, et al. Impact on costs and quality-adjusted-life-years of treat-to-target treatment strategies initiating methotrexate, or tocilizumab, or their combination in early rheumatoid arthritis. 5 year economic evaluation. *The Journal of rheumatology*. 2020.
186. Best JH, Vlad SC, Pei J. Comparative Cost per Response for 4 Clinical Endpoints with Tocilizumab Monotherapy vs Adalimumab Monotherapy in a Head-to-Head Randomized Double-Blind Superiority Trial (ADACTA) in Patients with Rheumatoid Arthritis. *Rheumatology & Therapy*. 2020;7(1):165-71.
187. Muszbek N, Proudfoot C, Fournier M, Chen CI, Kuznik A, Kiss Z, et al. Economic Evaluation of Sarilumab in the Treatment of Adult Patients with Moderately-to-Severely Active Rheumatoid Arthritis Who Have an Inadequate Response to Conventional Synthetic Disease-Modifying Antirheumatic Drugs. *Advances in Therapy*. 2019;36(6):1337-57.
